# Supplementary material for: Halogen bonding between entirely negative fluorine atoms? Evidence from the crystal packing of some gold(i) and gold(iii) complexes with extensively fluorinated m-terphenyl ligands and triphenylphosphane
Source: Royal Society of Chemistry journal article supplement (doi:10.1039/d0ce00671h), 2020-01-01
Supplement: d0ce00671h1.pdf [file d0ce00671h1.pdf]

Halogen bonding between entirely negative fluorine atoms? Evidence from the crystal packing of some gold(I) and gold(III) complexes with extensively fluorinated *m*-terphenyl ligands and triphenylphosphane

Alexandru Sava, Krisztina T. Kegyes, Bianca T. Popuş, Bernadette C. Dan, Cristian Silvestru,  
Ciprian I. Raţ\*

*Supramolecular Organic and Organometallic Chemistry Centre, Department of Chemistry, Faculty of Chemistry and Chemical Engineering, Babeş-Bolyai University, 11 Arany Janos, 400028 Cluj-Napoca, Romania.*

## Contents

|                                                         |    |
|---------------------------------------------------------|----|
| Synthesis and characterisation .....                    | 1  |
| Overview of synthetic routes .....                      | 1  |
| General experimental details .....                      | 1  |
| Numbering schemes for NMR assignments .....             | 2  |
| Synthetic procedures .....                              | 3  |
| Through space coupling .....                            | 7  |
| Crystallographic data .....                             | 8  |
| Tables S1-S6 .....                                      | 8  |
| Figures S4-S12 .....                                    | 11 |
| NMR spectra .....                                       | 16 |
| MS data.....                                            | 52 |
| Computational study .....                               | 64 |
| References .....                                        | 71 |
| Single point calculations compact archive entries ..... | 73 |

## Synthesis and characterisation

### Overview of synthetic routes

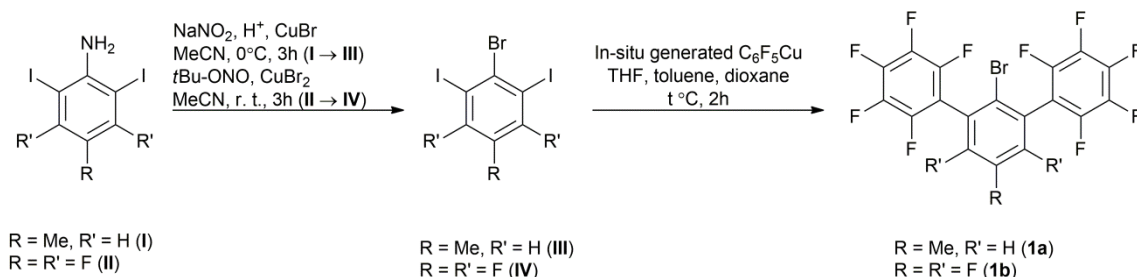

**Scheme S1.** Synthesis of proligands **1a** and **1b** starting from the corresponding iodo-substituted anilines **I** and **II**.

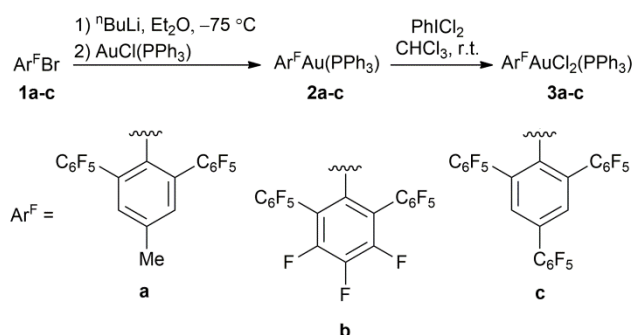

**Scheme S2.** Synthesis of the gold complexes **2a-c** and **3a-c**.

### General experimental details

Compounds **I**, **II**, **III** and **3a-3c**, were prepared in air, while the syntheses of **IV**, **1a-c** and **2a-c** were performed under argon using standard Schlenk techniques, with work-up carried out in air. Where required, solvents were dried by standard procedures and were freshly distilled under argon prior to use. Bromopentafluorobenzene, 3,4,5-trifluoroaniline, *p*-toluidine, *tert*-butyl nitrite (90%), butyllithium (1.6M in hexanes) and triphenylphosphane were purchased from commercial suppliers and used without further purification. Aniline was distilled before it was used. The other starting materials were prepared according to known (**1c**,<sup>1</sup>  $\text{AuCl}(\text{tth})$ ,<sup>2</sup>  $\text{PhICl}_2$ ,<sup>3</sup>) or modified literature procedures (2,6-*l*<sub>2</sub>-4-MeC<sub>6</sub>H<sub>2</sub>NH<sub>2</sub> (**I**),<sup>4</sup> 2,6-*l*<sub>2</sub>-C<sub>6</sub>F<sub>3</sub>NH<sub>2</sub> (**II**),<sup>5</sup>  $\text{AuCl}(\text{PPh}_3)$ <sup>6</sup>). Syntheses of the unreported aryl bromides, 2,6-*l*<sub>2</sub>-4-MeC<sub>6</sub>H<sub>2</sub>Br (**III**) and 2,6-*l*<sub>2</sub>-C<sub>6</sub>F<sub>3</sub>Br (**IV**), were also carried out by adapting literature procedures.<sup>7,8</sup>

The melting points are not corrected. MS/HRMS spectra were recorded on a Thermo Scientific Orbitrap XL mass spectrometer equipped with a standard ESI/APCI source. Data analysis and calculations of the theoretical isotopic patterns were carried out with the Xcalibur software package.<sup>9</sup> The <sup>1</sup>H, <sup>13</sup>C, <sup>31</sup>P and <sup>19</sup>F NMR spectra were recorded at room temperature on Bruker Avance III 400 or Bruker Avance III 600 instruments, while 2D <sup>1</sup>H–<sup>19</sup>F HOESY experiments were recorded on a Bruker AM-400 instrument. The <sup>1</sup>H chemical shifts are reported in  $\delta$  units (ppm) relative to the residual peak of the deuterated solvent (CHCl<sub>3</sub>, 7.26 ppm; CHD<sub>2</sub>CN, 1.94 ppm). The <sup>13</sup>C chemical shifts are reported in  $\delta$  units (ppm) relative to the peak of the deuterated solvent (CDCl<sub>3</sub>, 77.16 ppm; CD<sub>3</sub>CN, 1.32 ppm).<sup>10</sup> Where possible, the <sup>1</sup>H, <sup>13</sup>C and <sup>19</sup>F resonances were assigned using 2D correlation NMR experiments (COSY, HSQC, HMBC, HOESY). The <sup>31</sup>P and <sup>19</sup>F NMR chemical shifts are reported in  $\delta$  units (ppm) relative to H<sub>3</sub>PO<sub>4</sub> (0 ppm) and CFCl<sub>3</sub> (0 ppm), respectively, using the chemical shift of the lock solvent as a reference. The NMR spectra were processed using the MestReNova software.<sup>11</sup> For proligands **1a-1b** and gold(I) complexes <sup>19</sup>F were assigned according to numbering in Scheme S3. For gold(III) species, numbering in Scheme S4 was used, in accordance with the restricted rotation around C–C bonds connecting the flanking C<sub>6</sub>F<sub>5</sub> rings to the central aromatic ring (*vide infra*). <sup>1</sup>H and <sup>13</sup>C resonances for the triphenylphosphane in gold(I) complexes were attributed using *o,m,p,i*-nomenclature and for gold(III) complexes the unequivalence of the phenyl rings was indicated according to Figure S1 as Ph<sup>a</sup> and Ph<sup>b</sup>.

The details of the crystal structure determination and refinement for compounds **2a-2c** and **3a-3c** are given in Table S1. Data were collected on Bruker SMART APEX (**2a-2c**, **3a** and **3c**) and Agilent Technologies XCalibur (**3b**)

diffractometers, using graphite-monochromated Mo-K $\alpha$  radiation ( $\lambda = 0.71073 \text{ \AA}$ ). For this purpose the crystals were attached with Paratone oil to a cryo-loop. The structures were refined with anisotropic thermal parameters. All hydrogen atoms were refined with a riding model and a mutual isotropic thermal parameter. For structure solving and refinement the SHELXL-2018 software package were used.<sup>12</sup> The drawings were created with the Diamond program.<sup>13</sup> CCDC reference numbers: 1985132 (**2a**), 1981844 (**2b**), 1985133 (**2c**), 1981845 (**3a**), 1981847 (**3b**·CHCl<sub>3</sub>), 1981846 (**3c**·CHCl<sub>3</sub>).

### Numbering schemes for NMR assignments

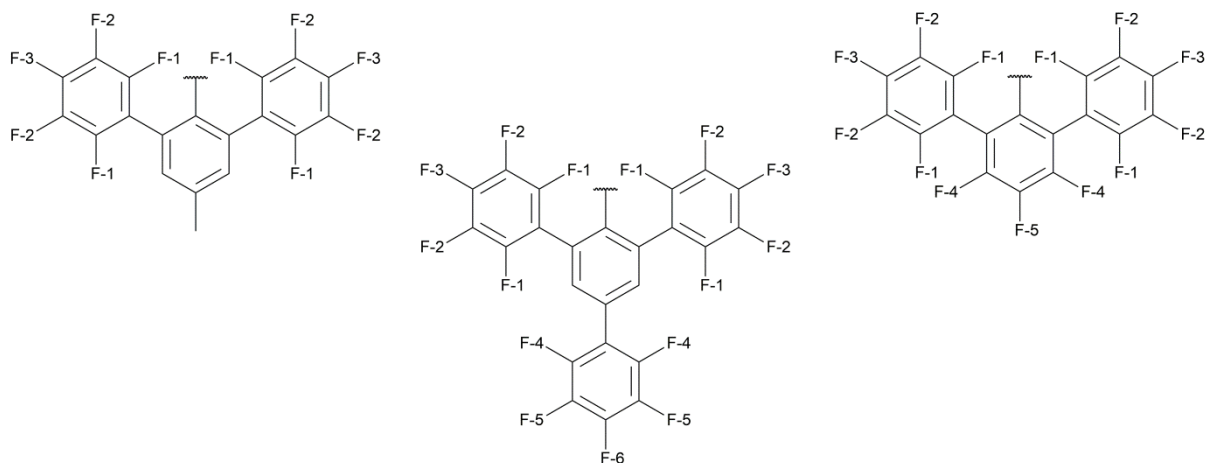

**Scheme S3.** Numbering scheme for assignments of <sup>19</sup>F NMR resonances of the proligands and gold(I) complexes.

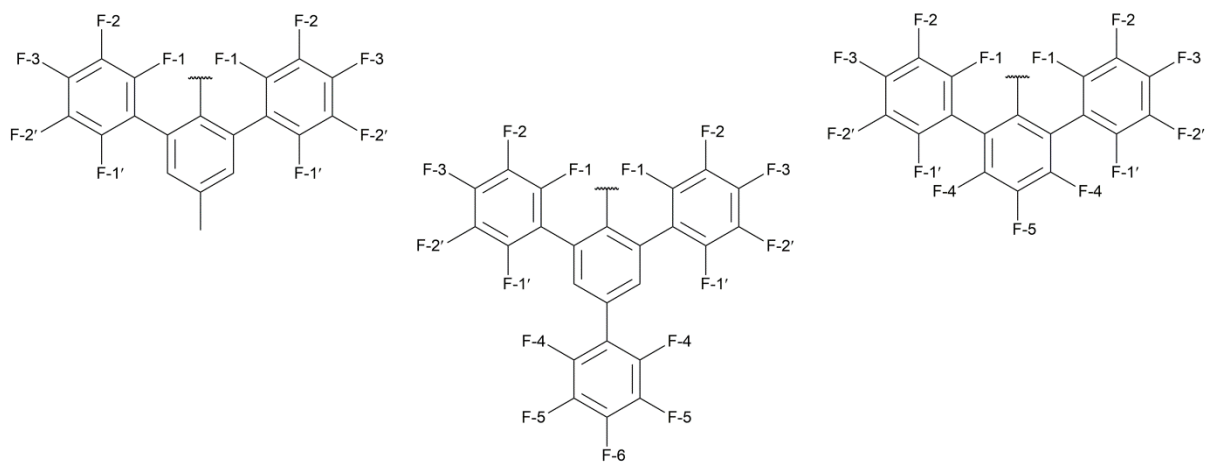

**Scheme S4.** Numbering scheme for assignments of <sup>19</sup>F NMR resonances of gold(III) complexes; "prime" denotes atoms pointing away from the bulky triphenylphosphane group.

## Synthetic procedures

**Synthesis of AuCl(PPh<sub>3</sub>).**<sup>14</sup> A 50 ml round bottom flask was charged with AuCl(tht) (1.27 g, 4 mmol) and triphenylphosphane (1.05 g, 4 mmol). Toluene (40 mL) was added and the mixture stirred for 2h at room temperature. The solid was filtered off, washed with diethyl ether (3 x 5 mL) and dried at reduced pressure to yield AuCl(PPh<sub>3</sub>) (1.64 g, 84%) as a white solid. <sup>1</sup>H NMR (CDCl<sub>3</sub>, 600 MHz): δ 7.44–7.55 (m, 15H). <sup>31</sup>P{<sup>1</sup>H} NMR (CDCl<sub>3</sub>, 243 MHz): δ 33.17 (s).

**Synthesis of 2,6-I<sub>2</sub>-4-MeC<sub>6</sub>H<sub>2</sub>NH<sub>2</sub> (I).** To a solution of *p*-toluidine (8 g, 74.66 mmol) in glacial acetic acid (250 mL) was added potassium iodide (16.52 g, 99.51 mmol) and potassium iodate (10.544 g, 49.27 mmol). The reaction mixture was stirred in an oil bath at 50 °C for 3.5 h. More potassium iodide (4.12 g, 24.88 mmol) and potassium iodate (2.64 g, 12.32 mmol) were added and stirred at 50 °C for another 1.5 h. The mixture was poured into a solution of sodium sulfite (24 g, 190.41 mmol) in water (300 mL). The brown precipitate was filtered off and dried at reduced pressure. Sublimation at 100 °C (9×10<sup>-3</sup> mbar) afforded the desired aniline as a slightly yellow solid (19.95 g, 74%), m.p. 118-119 °C (lit.<sup>15</sup> 123.5–125 °C). <sup>1</sup>H NMR (CDCl<sub>3</sub>, 400 MHz): δ 7.46 (s, 2H, C<sub>6</sub>H<sub>2</sub>), 4.45 (s, 2H, NH<sub>2</sub>), 2.17 (s, 3H, Me). <sup>13</sup>C{<sup>1</sup>H} NMR (CDCl<sub>3</sub>, 101 MHz): δ 143.92 (s), 139.88 (s), 131.11 (s), 81.60 (s), 19.38 (s).

**Synthesis of 2,6-I<sub>2</sub>-C<sub>6</sub>F<sub>3</sub>NH<sub>2</sub> (II).**<sup>16</sup> A 250 mL round-bottom flask was charged with glacial acetic acid (120 mL) and water (13.3 mL). Sodium chloride (23.87 g, 408.16 mmol), potassium iodide (33.87 g, 204.06 mmol), sodium *meta*-periodate (43.65 g, 204.08 mmol) and 3,4,5-trifluoroaniline (10 g, 68.02 mmol) were added under vigorous stirring. The reaction mixture was heated at 50 °C for 12 h on an oil bath. Afterward, the dark brown mixture was poured into a solution of sodium sulfite (21.71 g, 172.27 mmol) in water (270 mL) and the brown precipitate was filtered off and dried at reduced pressure to obtain the desired aniline as a slightly brown solid (25.61 g, 97%), m.p. 65-66 °C. <sup>1</sup>H NMR (CDCl<sub>3</sub>, 600 MHz): δ 4.77 (s, 2H, NH<sub>2</sub>). <sup>13</sup>C{<sup>1</sup>H} NMR (CDCl<sub>3</sub>, 151 MHz): δ 151.38 (ddd, *J*<sub>C,F</sub> = 244, 12, 6 Hz), 143.10 (m), 131.05 (dt, *J*<sub>C,F</sub> = 248, 19 Hz), 63.17 (m). <sup>19</sup>F{<sup>1</sup>H} NMR (CDCl<sub>3</sub>, 565 MHz): δ -109.31 (d, *J*<sub>F,F</sub> = 24 Hz, 2F), -167.16 (t, *J*<sub>F,F</sub> = 23 Hz, 1F).

**Synthesis of 2,6-I<sub>2</sub>-4-MeC<sub>6</sub>H<sub>2</sub>Br (III).** A suspension of 2,6-I<sub>2</sub>-4-MeC<sub>6</sub>H<sub>2</sub>NH<sub>2</sub> (I, 1.436 g, 4 mmol) and *p*-toluenesulfonic acid monohydrate (2.283 g, 12 mmol) in acetonitrile (60 mL) was cooled to 0 °C. A solution of sodium nitrite (0.552 g, 8 mmol) in water (2 mL) was added dropwise *via* syringe. The reaction mixture was stirred at 0 °C for 30 min, then copper(I) bromide (1.435 g, 10 mmol) was added portion-wise and the mixture stirred for another 3 h at 0 °C. The suspension was taken out from the ice bath and after reaching room temperature, distilled water was added (50 mL). The aqueous phase was extracted with dichloromethane (3×50 mL). The combined organic phases were dried over anhydrous MgSO<sub>4</sub> and filtered, followed by removal of the solvents using a rotary evaporator. The crude product was partially purified by column chromatography (silica gel, hexane) yielding III in a mixture with an unidentified impurity (5-10%) as a white solid (0.90 g), m.p. 110-111 °C. The product was used without further purification for the synthesis of the proligand **1a**. <sup>1</sup>H NMR (CDCl<sub>3</sub>, 400 MHz): δ 7.67 (s, 2H, C<sub>6</sub>H<sub>2</sub>), 2.20 (s, 3H, Me). <sup>13</sup>C{<sup>1</sup>H} NMR (CDCl<sub>3</sub>, 101 MHz): δ 140.99 (s), 140.37 (s), 132.64 (s), 99.70 (s), 19.89 (s). HRMS (APCI+, MeCN), *m/z* : [M<sup>+</sup>] calcd. for C<sub>7</sub>H<sub>5</sub>BrI<sub>2</sub>, 421.76585; Found, 421.76495.

**Synthesis of 2,6-I<sub>2</sub>-C<sub>6</sub>F<sub>3</sub>Br (IV).** A 100 mL three-necked round-bottom flask fitted with argon inlet and dropping funnel was charged with copper(II) bromide (4.45 g, 19.92 mmol). Acetonitrile (42 mL) was collected in the dropping funnel and part of it (15 mL) was introduced into the flask. *tert*-Butyl nitrite (90%, 2.60 g, 22.69 mmol) was added into the flask and the solution introduced in a water bath at room temperature. 2,6-I<sub>2</sub>-C<sub>6</sub>F<sub>3</sub>NH<sub>2</sub> (II, 6.57 g, 16.47 mmol) was added over the remaining acetonitrile (27 mL) from the dropping funnel and the resulting solution added dropwise over 1 h. The reaction mixture was stirred for further 2 h at room temperature. Water was added (60 mL) and the mixture extracted with diethyl ether (3 × 40 mL). The combined organic fractions were washed with brine (40 mL), dried over anhydrous Na<sub>2</sub>SO<sub>4</sub>, filtered and the solvent removed using a rotary evaporator to afford IV as an orange solid (6.93 g, 91%), m.p. 66-67 °C. <sup>13</sup>C{<sup>1</sup>H} NMR (CDCl<sub>3</sub>, 151 MHz): δ 151.90 (ddd, *J*<sub>C,F</sub> = 250, 11, 5 Hz), 137.02 (dt, *J*<sub>C,F</sub> = 261, 19 Hz), 130.88 (d, *J*<sub>C,F</sub> = 5 Hz), 84.27 (m). <sup>19</sup>F{<sup>1</sup>H} NMR (CDCl<sub>3</sub>, 376 MHz): δ -99.75 (d, *J*<sub>F,F</sub> = 22 Hz, 2F), -152.97 (t, *J*<sub>F,F</sub> = 22 Hz, 1F). HRMS (APCI+, MeCN), *m/z* : [M<sup>+</sup>] calcd. for C<sub>6</sub>F<sub>3</sub>BrI<sub>2</sub>, 461.72193; Found, 461.72144.

**Synthesis of 2,6-(C<sub>6</sub>F<sub>5</sub>)<sub>2</sub>-4-MeC<sub>6</sub>H<sub>2</sub>Br (1a).** A 100 mL three-necked round-bottom flask fitted with argon inlet, dropping funnel and reflux condenser was charged with magnesium turnings (0.53 g, 22 mmol). THF (25 mL) was collected in the dropping funnel and a part of it (10 mL) was added into the flask. C<sub>6</sub>F<sub>5</sub>Br (4.94 g, 20 mmol) was

added to the remaining solvent in the dropping funnel. 1,2-Br<sub>2</sub>C<sub>2</sub>H<sub>4</sub> (0.37 g, 2 mmol) was introduced in the flask and the content carefully heated to reflux. Under vigorous stirring and gentle heating, the content of the dropping funnel was added dropwise into the flask. The reaction mixture was stirred at 86 °C for 1.5 h and then allowed to reach room temperature. Another 100 mL three-necked round-bottom flask fitted with argon inlet, dropping funnel and reflux condenser was charged with anhydrous copper(I) bromide (3.012 g, 21 mmol) and the dark brown solution of C<sub>6</sub>F<sub>5</sub>MgBr in THF (25 mL) was added *via* syringe. The resulting brown suspension was stirred at room temperature for 20 min and dioxane (7 mL) was added. After 30 min of stirring, a solution of 2,6-l<sub>2</sub>-4-MeC<sub>6</sub>H<sub>2</sub>Br (**III**, 2.513 g, 6 mmol) in toluene (25 mL) was added dropwise from the dropping funnel. The reaction mixture was stirred at 75 °C on an oil bath for 2 h, allowed to reach room temperature and filtered through a pad of silica and washed with diethyl ether. The solvents were removed from the filtrate using a rotary evaporator. The remaining solid was heated 50-75 °C (9×10<sup>-3</sup> mbar) for 3-4 hours in a sublimation apparatus to remove decafluorobiphenyl and other oily impurities. Further sublimation at 80 °C afforded **1a** as a white solid (2.02 g, 67%), m.p. 105-106 °C. <sup>1</sup>H NMR (CDCl<sub>3</sub>, 400 MHz): δ 7.23 (s, 2H, C<sub>6</sub>H<sub>2</sub>), 2.43 (s, 3H, Me). <sup>13</sup>C{<sup>1</sup>H} NMR (CDCl<sub>3</sub>, 101 MHz): δ 144.25 (dm, <sup>1</sup>J<sub>C,F</sub> = 249 Hz), 141.53 (dm, <sup>1</sup>J<sub>C,F</sub> = 257 Hz), 138.37 (s), 137.85 (dm, <sup>1</sup>J<sub>C,F</sub> = 255 Hz), 133.96 (s), 129.46 (s), 122.95 (s), 115.30 (td, J<sub>C,F</sub> = 19 and 4 Hz), 20.92 (s). <sup>19</sup>F{<sup>1</sup>H} NMR (CDCl<sub>3</sub>, 376 MHz): δ -129.48 (m, 4F, F-1), -153.63 (t, J<sub>F,F</sub> = 21 Hz, 2F, F-3), -161.77 (tt, J<sub>F,F</sub> = 21 and 5 Hz, 4F, F-2). HRMS (APCI+, MeCN), m/z : [M<sup>+</sup>] calcd. for C<sub>19</sub>H<sub>5</sub>F<sub>10</sub>Br, 501.94095; Found, 501.94133.

**Synthesis of 2,6-(C<sub>6</sub>F<sub>5</sub>)<sub>2</sub>C<sub>6</sub>F<sub>3</sub>Br (1b).** The procedure was similar to **1a**. Amounts used: magnesium turnings (1.85 g, 76.13 mmol), THF (80 mL, of which 20 mL were added into the flask); C<sub>6</sub>F<sub>5</sub>Br (18.4 g, 74.51 mmol), 1,2-Br<sub>2</sub>C<sub>2</sub>H<sub>4</sub> (0.3 g, 1.6 mmol), anhydrous copper(I) bromide (11.8 g, 82.26 mmol), dioxane (25 mL), 2,6-l<sub>2</sub>-C<sub>6</sub>F<sub>3</sub>Br (**IV**, 11 g, 23.77 mmol), toluene (80 mL). Comments: The solution of C<sub>6</sub>F<sub>5</sub>MgBr was transferred *via* cannula over 5 min. The reaction mixture was stirred at 60 °C for 2 h, allowed to reach room temperature and quenched with methanol (6 mL). For the sublimation, the temperature was slowly increased up to 85 °C to obtain **1b** as a white solid (7.4 g, 58%), m.p. 109-111 °C (lit.<sup>17</sup> 99-100 °C). <sup>13</sup>C{<sup>1</sup>H} NMR (CDCl<sub>3</sub>, 101 MHz): δ 150.61 (dm, <sup>1</sup>J<sub>C,F</sub> = 260 Hz), 144.48 (dm, <sup>1</sup>J<sub>C,F</sub> = 253), 142.69 (dm, <sup>1</sup>J<sub>C,F</sub> = 259), 139.89 (dt, J<sub>C,F</sub> = 259 and 16 Hz), 138.06 (dm, <sup>1</sup>J<sub>C,F</sub> = 252 Hz), 121.76 (s), 115.46 (m), 107.61 (m). <sup>19</sup>F{<sup>1</sup>H} NMR (CDCl<sub>3</sub>, 376 MHz): δ -123.93 (d, J<sub>F,F</sub> = 22 Hz, 2F, F-4), -137.66 (m, 4F, F-1), -150.19 (tt, J<sub>F,F</sub> = 21 and 3 Hz, 2F, F-3), -155.59 (t, J<sub>F,F</sub> = 22 Hz, 1F, F-5), -160.44 (m, 4F, F-2).

**Synthesis of 2,6-(C<sub>6</sub>F<sub>5</sub>)<sub>2</sub>-4-MeC<sub>6</sub>H<sub>2</sub>Au(PPh<sub>3</sub>) (2a).** A 25 mL Schlenk flask was charged with 2,6-(C<sub>6</sub>F<sub>5</sub>)<sub>2</sub>-4-MeC<sub>6</sub>H<sub>2</sub>Br (**1a**, 503 mg, 1 mmol) and diethyl ether (10 mL) was added. The colorless solution was cooled to -75 °C, using a liquid nitrogen-ethanol bath, and kept for 15 minutes. A solution of *n*-BuLi (1.6 M in hexane, 0.63 mL, 1 mmol) was added dropwise *via* syringe. The temperature was maintained between -70 and -75 °C for 1h. Solid AuCl(PPh<sub>3</sub>) (495 mg, 1 mmol) was added and the mixture was left to slowly warm up to -25 °C, then taken out from the bath and kept for 30 minutes at room temperature. The yellow suspension was filtered over a pad of anhydrous Na<sub>2</sub>SO<sub>4</sub>, in air. The pad was washed with freshly distilled diethyl ether (3 x 5 mL) and the organic fractions combined. Removal of solvent at reduced pressure gave a slightly yellow solid. The crude product was purified by column chromatography (alumina, petroleum ether until organic impurities started to be collected and then petroleum ether/ethyl acetate: 9/1). Removal of the volatiles at reduced pressure gave **2a** as a white solid (446 mg, 50%), m.p. 185-187 °C. Suitable crystals for structure determination were obtained by heptane diffusion into a solution of the compound in CHCl<sub>3</sub> (heptane/CHCl<sub>3</sub>: 2/1, v/v). <sup>1</sup>H NMR (CDCl<sub>3</sub>, 600 MHz) δ 7.49 (td, J = 7, 2 Hz, 3H, *p*-H), 7.41 (td, J = 8, 2 Hz, 6H, *m*-H), 7.29-7.23 (m, 6H, *o*-H), 7.22 (2H, C<sub>6</sub>H<sub>2</sub>), 2.42 (s, 3H, Me). <sup>13</sup>C{<sup>1</sup>H} NMR (CDCl<sub>3</sub>, 151 MHz): δ 174.70 (d, <sup>2</sup>J<sub>C,P</sub> = 113 Hz), 144.60 (dm, <sup>1</sup>J<sub>C,F</sub> = 245 Hz), 139.81 (dm, <sup>1</sup>J<sub>C,F</sub> = 251 Hz), 137.44 (dm, <sup>1</sup>J<sub>C,F</sub> = 250 Hz), 135.58 (s), 135.40 (s), 133.99 (d, <sup>2</sup>J<sub>C,P</sub> = 14 Hz, *o*-C), 131.48 (d, <sup>4</sup>J<sub>C,P</sub> = 3 Hz, *p*-C), 130.47 (d, <sup>4</sup>J<sub>C,P</sub> = 5.5 Hz), 130.35 (d, <sup>1</sup>J<sub>C,P</sub> = 52 Hz, *i*-C), 129.15 (d, <sup>3</sup>J<sub>C,P</sub> = 11 Hz, *m*-C), 121.79 (t, J = 18 Hz), 21.26 (s). <sup>19</sup>F{<sup>1</sup>H} NMR (CDCl<sub>3</sub>, 565 MHz): δ -139.55 (dd, J<sub>F,F</sub> = 24 and 8 Hz, F-1), -158.11 (t, J<sub>F,F</sub> = 21 Hz, F-3), -163.69 (ddd, J<sub>F,F</sub> = 24, 20 and 8 Hz, F-2). <sup>31</sup>P{<sup>1</sup>H} NMR (CDCl<sub>3</sub>, 243 MHz): δ 43.21(s). MS (APCI+, MeCN), m/z (relative intensity, %): 1341.14 (35) [M<sup>+</sup> + Au(PPh<sub>3</sub>)], 721.15 (11) [Au(PPh<sub>3</sub>)<sub>2</sub><sup>+</sup>], 500.09 (100) [Au(PPh<sub>3</sub>)<sup>+</sup> + MeCN], 459.06 (19) [Au(PPh<sub>3</sub>)<sup>+</sup>]. HRMS (APCI+, MeCN), m/z : [M<sup>+</sup> + Au(PPh<sub>3</sub>)] calcd. for C<sub>55</sub>H<sub>35</sub>F<sub>10</sub>P<sub>2</sub>Au<sub>2</sub>, 1341.13799; Found, 1341.14600. MS (APCI-, MeCN), m/z (relative intensity, %): 732.97 (30) [C<sub>21</sub>H<sub>5</sub>F<sub>13</sub>O<sub>2</sub>Au<sup>-</sup>], 651.98 (29) [C<sub>19</sub>H<sub>5</sub>F<sub>10</sub>O<sub>2</sub>Au<sup>-</sup>], 619.99 (100) [C<sub>19</sub>H<sub>5</sub>F<sub>10</sub>Au<sup>-</sup>], 600.99 (47) [C<sub>19</sub>H<sub>5</sub>F<sub>9</sub>Au<sup>-</sup>], 416.01 (45) [C<sub>19</sub>H<sub>4</sub>F<sub>8</sub>O<sub>2</sub><sup>-</sup>]. HRMS (APCI-, MeCN), m/z : [M<sup>-</sup> - PPh<sub>3</sub>] calcd. for C<sub>19</sub>H<sub>5</sub>F<sub>10</sub>Au, 619.98916; Found, 619.99011.

**Synthesis of 2,6-(C<sub>6</sub>F<sub>5</sub>)<sub>2</sub>C<sub>6</sub>F<sub>3</sub>Au(PPh<sub>3</sub>) (2b).** A 25 mL Schlenk flask was charged with 2,6-(C<sub>6</sub>F<sub>5</sub>)<sub>2</sub>C<sub>6</sub>F<sub>3</sub>Br (**1b**, 542 mg, 1 mmol) and diethyl ether (10 mL) was added. The colorless solution was cooled to -75 °C and kept for 15 minutes. A solution of *n*-BuLi (1.6 M in hexane, 0.64 mL, 1.02 mmol) was added dropwise *via* syringe. After the last drops, the solution suddenly changed color from yellow to dark green. The temperature was maintained

between  $-70\text{ }^{\circ}\text{C}$  and  $-75\text{ }^{\circ}\text{C}$  for 30 minutes. Solid  $\text{AuCl}(\text{PPh}_3)$  (505 mg, 1.02 mmol) was added and the mixture was left to slowly warm up to  $-25\text{ }^{\circ}\text{C}$ , taken out from the bath and kept for 30 minutes at room temperature. The slightly yellow suspension was filtered over a pad of anhydrous  $\text{Na}_2\text{SO}_4$ , in air. The pad was washed with freshly distilled diethyl ether (3 x 5 mL) and the organic fractions combined. Removal of solvent at reduced pressure gave slightly yellow solid. The crude product was purified by column chromatography (alumina, heptane/ethyl acetate: 9/1). The solvent was removed using a rotary evaporator, yielding a slightly yellow oil which solidified upon addition of pentane (3 mL). Removal of the volatiles at reduced pressure gave **2b** as a white solid (800 mg, 87%), m.p.  $133\text{-}135\text{ }^{\circ}\text{C}$ . Suitable crystals for structure determination were obtained by slow evaporation of the solvent from a concentrated heptane solution.  **$^1\text{H}$  NMR** ( $\text{CDCl}_3$ , 400 MHz):  $\delta$  7.51 (td,  $J = 7$  and 2 Hz, 3H, *p*-H), 7.42 (td,  $J = 8$  and 2 Hz, 6H, *m*-H), 7.21 (ddd,  $J = 12$ , 8 and 1 Hz, 6H, *o*-H).  **$^{13}\text{C}\{^1\text{H}\}$  NMR** ( $\text{CDCl}_3$ , 101 MHz):  $\delta$  176.30 (d,  $^2J_{\text{C,P}} = 114$  Hz), 150.13 (dt,  $J_{\text{C,F}} = 272$  and 13 Hz), 144.78 (dm,  $^1J_{\text{C,F}} = 249$  Hz), 140.81 (dm,  $^1J_{\text{C,F}} = 256$  Hz), 138.40 (dt,  $J_{\text{C,F}} = 249$  and 16 Hz), 137.57 (dm,  $^1J_{\text{C,F}} = 252$  Hz), 133.88 (d,  $^2J_{\text{C,P}} = 14$  Hz, *o*-C), 131.79 (d,  $^4J_{\text{C,P}} = 3$  Hz, *p*-C), 129.60 (d,  $^1J_{\text{C,P}} = 53$  Hz, *i*-C), 129.31 (d,  $^3J_{\text{C,P}} = 11$  Hz, *m*-C), 118.34 (s), 114.26 (t,  $J_{\text{C,F}} = 18$  Hz).  **$^{19}\text{F}\{^1\text{H}\}$  NMR** ( $\text{CDCl}_3$ , 376 MHz):  $\delta$   $-131.06$  (dd,  $J_{\text{F,F}} = 21$  and 6 Hz, 2F, F-4),  $-138.03$  (dd,  $J_{\text{F,F}} = 23$  and 8 Hz, 4F, F-1),  $-155.05$  (t,  $J_{\text{F,F}} = 21$  Hz, 2F, F-3),  $-162.23$  (t,  $J_{\text{F,F}} = 21$  Hz, 1F, F-5),  $-162.63$  (td,  $J_{\text{F,F}} = 22$  and 8 Hz, 4F, F-2).  **$^{31}\text{P}\{^1\text{H}\}$  NMR** ( $\text{CDCl}_3$ , 162 MHz):  $\delta$  42.25 (t,  $^5J_{\text{P,F}} = 6$  Hz). **MS** (APCI+, MeCN),  $m/z$  (relative intensity, %): 1381.09 (19) [ $\text{M}^+ + \text{Au}(\text{PPh}_3)$ ], 721.15 (9) [ $\text{Au}(\text{PPh}_3)_2^+$ ], 500.09 (100) [ $\text{Au}(\text{PPh}_3)^+ + \text{MeCN}$ ], 459.06 (21) [ $\text{Au}(\text{PPh}_3)^+$ ]. **HRMS** (APCI+, MeCN),  $m/z$ : [ $\text{M}^+ + \text{Au}(\text{PPh}_3)$ ] calcd. for  $\text{C}_{54}\text{H}_{30}\text{F}_{13}\text{P}_2\text{Au}_2$ , 1381.09407; Found, 1381.09651. **MS** (APCI-, MeCN),  $m/z$  (relative intensity, %): 772.93 (23) [ $\text{C}_{20}\text{F}_{16}\text{O}_2\text{Au}^-$ ], 678.94 (17) [ $\text{C}_{18}\text{F}_{14}\text{Au}^-$ ], 659.95 (100) [ $\text{C}_{18}\text{F}_{13}\text{Au}^-$ ], 640.95 (14) [ $\text{C}_{18}\text{F}_{12}\text{Au}^-$ ], 475.97 (23) [ $\text{C}_{18}\text{F}_{12}\text{O}_2^-$ ]. **HRMS** (APCI-, MeCN),  $m/z$ : [ $\text{M}^- - \text{PPh}_3$ ] calcd. for  $\text{C}_{18}\text{F}_{13}\text{Au}$ , 659.94525; Found, 659.94520.

**Synthesis of 2,4,6-( $\text{C}_6\text{F}_5$ ) $_3\text{C}_6\text{H}_2\text{Au}(\text{PPh}_3)$  (**2c**).** A 25 mL Schlenk flask was charged with 2,4,6-( $\text{C}_6\text{F}_5$ ) $_3\text{C}_6\text{H}_2\text{Br}$  (**1c**, 655 mg, 1 mmol) and anhydrous diethyl ether (10 mL) was added. The solution was cooled to  $-85\text{ }^{\circ}\text{C}$  and kept for 15 minutes. A white precipitate formed. A solution of *n*-BuLi (1.6 M in hexane, 0.62 mL, 1 mmol) was added dropwise *via* syringe. The suspension was left to warm up to  $-70\text{ }^{\circ}\text{C}$  and stirred for 1h between  $-70\text{ }^{\circ}\text{C}$  and  $-75\text{ }^{\circ}\text{C}$ . During this time, it turned into a slightly yellow solution and then suddenly a white precipitate formed. The suspension was cooled to  $-80\text{ }^{\circ}\text{C}$  and solid  $\text{AuCl}(\text{PPh}_3)$  (495 mg, 1 mmol) was added. The mixture was left to slowly warm up to room temperature overnight. The colorless suspension was filtered over a pad of anhydrous  $\text{Na}_2\text{SO}_4$ , in air. The pad was washed with freshly distilled diethyl ether (3 x 5 mL) and the organic fractions combined. Removal of solvent at reduced pressure gave **2c** as a white solid (935 mg, 89%), m.p.  $189\text{-}191\text{ }^{\circ}\text{C}$ . Suitable crystals for structure determination were obtained by slow evaporation of solvent from a concentrated heptane solution.  **$^1\text{H}$  NMR** ( $\text{CDCl}_3$ , 600 MHz):  $\delta$  7.51 (td,  $J = 7$  and 2 Hz, 3H, *p*-H), 7.46 (s, 2H,  $\text{C}_6\text{H}_2$ ), 7.42 (td,  $J = 8$  and 2 Hz, 6H, *m*-H), 7.29-7.22 (m, 6H, *o*-H).  **$^{13}\text{C}\{^1\text{H}\}$  NMR** ( $\text{CDCl}_3$ , 151 MHz):  $\delta$  180.60 (d,  $^2J_{\text{C,P}} = 112$  Hz), 144.59 (dm,  $^1J_{\text{C,F}} = 246$  Hz), 144.25 (dm,  $^1J_{\text{C,F}} = 249$  Hz), 140.35 (dm,  $^1J_{\text{C,F}} = 254$  Hz), 140.15 (dm,  $^1J_{\text{C,F}} = 252$  Hz), 137.90 (dm,  $^1J_{\text{C,F}} = 252$  Hz), 137.55 (dm,  $^1J_{\text{C,F}} = 250$  Hz), 136.27 (s), 133.97 (d,  $^2J_{\text{C,P}} = 14$  Hz, *o*-C), 131.63 (d,  $^4J_{\text{C,P}} = 2$  Hz, *p*-C), 130.91 (d,  $^4J_{\text{C,P}} = 5$  Hz), 130.05 (d,  $^1J_{\text{C,P}} = 52$  Hz, *i*-C), 129.25 (d,  $^3J_{\text{C,P}} = 11$  Hz, *m*-C), 123.92 (s), 120.93 (t,  $J = 18$  Hz), 115.39 (td,  $J = 16$ , 3 Hz).  **$^{19}\text{F}\{^1\text{H}\}$  NMR** ( $\text{CDCl}_3$ , 565 MHz):  $\delta$   $-139.32$  (dd,  $J_{\text{F,F}} = 24$  and 8 Hz, 4F, F-1),  $-142.92$  (dd,  $J_{\text{F,F}} = 23$  and 8 Hz, 2F, F-4),  $-155.48$  (t,  $J_{\text{F,F}} = 21$  Hz, 1F, F-6),  $-157.00$  (t,  $J_{\text{F,F}} = 21$  Hz, 2F, F-3),  $-162.17$  (td,  $J_{\text{F,F}} = 22$  and 8 Hz, 2F, F-5),  $-163.12$  (td,  $J_{\text{F,F}} = 23$  and 8 Hz, 4F, F-2).  **$^{31}\text{P}\{^1\text{H}\}$  NMR** ( $\text{CDCl}_3$ , 243 MHz):  $\delta$  42.86 (s). **MS** (APCI+, MeCN),  $m/z$  (relative intensity, %): 1493.11 (35) [ $\text{M}^+ + \text{Au}(\text{PPh}_3)$ ], 721.15 (10) [ $\text{Au}(\text{PPh}_3)_2^+$ ], 500.09 (100) [ $\text{Au}(\text{PPh}_3)^+ + \text{MeCN}$ ], 459.06 (14) [ $\text{Au}(\text{PPh}_3)^+$ ]. **HRMS** (APCI+, MeCN),  $m/z$ : [ $\text{M}^+ + \text{Au}(\text{PPh}_3)$ ] calcd. for  $\text{C}_{60}\text{H}_{32}\text{F}_{15}\text{P}_2\text{Au}_2$ , 1493.10653; Found, 1493.11211. **MS** (APCI-, MeCN),  $m/z$  (relative intensity, %): 884.94 (21) [ $\text{C}_{26}\text{H}_2\text{F}_{18}\text{O}_2\text{Au}^-$ ], 865.94 (10) [ $\text{C}_{26}\text{H}_2\text{F}_{17}\text{O}_2\text{Au}^-$ ], 803.95 (18) [ $\text{C}_{24}\text{H}_2\text{F}_{15}\text{O}_2\text{Au}^-$ ], 771.96 (33) [ $\text{C}_{24}\text{H}_2\text{F}_{15}\text{Au}^-$ ], 606.98 (12) [ $\text{C}_{24}\text{H}_2\text{F}_{15}\text{O}_2^-$ ], 587.98 (15) [ $\text{C}_{24}\text{H}_2\text{F}_{14}\text{O}_2^-$ ], 567.98 (100) [ $\text{C}_{24}\text{HF}_{13}\text{O}_2^-$ ], 547.97 (54) [ $\text{C}_{24}\text{F}_{12}\text{O}_2^-$ ]. **HRMS** (APCI-, MeCN),  $m/z$ : [ $\text{M}^- - \text{PPh}_3$ ] calcd. for  $\text{C}_{24}\text{H}_2\text{F}_{15}\text{Au}$ , 771.95770; Found, 771.95815.

**Synthesis of 2,6-( $\text{C}_6\text{F}_5$ ) $_2$ -4-Me $\text{C}_6\text{H}_2\text{AuCl}_2(\text{PPh}_3)$  (**3a**).** A 10 mL round bottom flask was charged with 2,6-( $\text{C}_6\text{F}_5$ ) $_2$ -4-Me $\text{C}_6\text{H}_2\text{Au}(\text{PPh}_3)$  (**2a**, 132 mg, 0.15 mmol) and chloroform (7 mL) was added. While stirring continuously,  $\text{PhICl}_2$  (48 mg, 0.17 mmol) was added portionwise over 5 min. The mixture was stirred for 2h at room temperature and then petroleum ether (30 mL) was added until no further precipitation was observed. The crude product was collected by filtration, washed with pentane (3 x 5 mL) and dried at reduced pressure to give **3a** as a white solid (95 mg, 66%), m.p.  $165\text{ }^{\circ}\text{C}$  (dec). Suitable crystals for structure determination were obtained by heptane diffusion into a solution of the compound in  $\text{CH}_2\text{Cl}_2$  (heptane/ $\text{CH}_2\text{Cl}_2$ : 2/1, v/v).  **$^1\text{H}$  NMR** ( $\text{CDCl}_3$ , 600 MHz):  $\delta$  7.61-7.57 (m, 2H, *p*-H<sup>b</sup>), 7.51 (t,  $J = 8$  Hz and 1H, *p*-H<sup>a</sup>), 7.41 (td,  $J = 8$  and 3 Hz, 6H, *m*-H<sup>a</sup>, *m*-H<sup>b</sup>), 7.21 (dd,  $J = 13$  and 8 Hz, 4H, *o*-H<sup>b</sup>), 7.05 (s, 2H,  $\text{C}_6\text{H}_2$ ), 6.73 (dd,  $J = 13$  and 8 Hz, 2H, *o*-H<sup>a</sup>), 2.40 (s, 3H, Me).  **$^{13}\text{C}\{^1\text{H}\}$  NMR** ( $\text{CDCl}_3$ , 151 MHz):  $\delta$  145.28 (dm,  $^1J_{\text{C,F}} = 248$  Hz), 143.66 (dm,  $^1J_{\text{C,F}} = 240$  Hz), 141.59 (s), 141.20 (dm,  $^1J_{\text{C,F}} = 250$  Hz), 138.27 (dm,  $^1J_{\text{C,F}} =$

254 Hz), 137.28 (s), 137.08 (dm,  $^1J_{C,F} = 251$  Hz), 135.37 (s), 134.61 (dt,  $J = 10$  and 4 Hz,  $o-C^a$ ), 134.27 (d,  $^2J_{C,P} = 11$  Hz,  $o-C^b$ ), 133.15 (d,  $^4J_{C,P} = 3$  Hz,  $p-C^a$ ), 133.10 (d,  $^4J_{C,P} = 3$  Hz,  $p-C^b$ ), 130.82 (s), 129.14 (d,  $^3J_{C,P} = 13$  Hz,  $m-C^b$ ), 129.05 (d,  $^3J_{C,P} = 14$  Hz,  $m-C^a$ ), 125.47 (d,  $^1J_{C,P} = 68$  Hz,  $i-C^b$ ), 123.45 (d,  $^1J_{C,P} = 64$  Hz,  $i-C^a$ ), 117.77 – 117.08 (m), 20.49 (s).  $^{19}F\{^1H\}$  NMR (CDCl<sub>3</sub>, 565 MHz):  $\delta$  -130.47 (dd,  $J_{F,F} = 24$  and 8 Hz, 2F, F-1'), -138.01 (dd,  $J = 22$ , 6 Hz, 2F, F-1), -153.50 (t,  $J = 21$  Hz, 2F, F-3), -160.00 (td,  $J = 23$ , 7 Hz, 2F, F-2'), -162.33 (td,  $J_{F,F} = 23$  and 8 Hz, 2F, F-2).  $^{31}P\{^1H\}$  NMR (CDCl<sub>3</sub>, 243 MHz):  $\delta$  30.05 (s). MS (ESI+, MeCN),  $m/z$  (relative intensity, %): 1929.02 (100) [2M<sup>+</sup> + Na], 975.01 (54) [M<sup>+</sup> + Na]. HRMS (ESI+, MeCN),  $m/z$ : [M<sup>+</sup> + Na] calcd. for C<sub>37</sub>H<sub>20</sub>F<sub>10</sub>Cl<sub>2</sub>PAuNa, 975.00777; Found, 975.00821.

**Synthesis of 2,6-(C<sub>6</sub>F<sub>5</sub>)<sub>2</sub>C<sub>6</sub>F<sub>3</sub>AuCl<sub>2</sub>(PPh<sub>3</sub>) (3b).** A 10 mL round bottom flask was charged with 2,6-(C<sub>6</sub>F<sub>5</sub>)<sub>2</sub>C<sub>6</sub>F<sub>3</sub>Au(PPh<sub>3</sub>) (**2b**, 380 mg, 0.41 mmol) and chloroform (5 mL) was added. While stirring continuously, PhICl<sub>2</sub> (115 mg, 0.41 mmol) was added portionwise over 5 min. The mixture was stirred for 2h at room temperature and then precipitated with pentane (25 mL). The crude product was collected by filtration, washed with pentane (2 x 5 mL) and dried at reduced pressure to give **3b** as a white solid (373 mg, 91%), m.p. 210 °C (dec.). Suitable crystals for structure determination were obtained by heptane diffusion into a solution of the compound in CHCl<sub>3</sub> (heptane/CHCl<sub>3</sub> : 2/1, v/v).  $^1H$  NMR (CDCl<sub>3</sub>, 600 MHz):  $\delta$  7.67-7.57 (m, 3H,  $p-H^a$ ,  $p-H^b$ ), 7.44 (td,  $J = 8$  and 3 Hz, 4H,  $m-H^b$ ), 7.35 (td,  $J = 8$  and 3 Hz, 2H,  $m-H^a$ ), 7.17 (ddd,  $J = 14$ , 8 and 1 Hz, 4H,  $o-H^b$ ), 6.80 (ddd,  $J = 13$ , 8 and 1 Hz, 2H,  $o-H^a$ ).  $^{13}C\{^1H\}$  NMR (CDCl<sub>3</sub>, 151 MHz):  $\delta$  150.71 (dm,  $^1J_{C,F} = 261$  Hz), 145.46 (dm,  $^1J_{C,F} = 258$  Hz), 144.07 (dm,  $^1J_{C,F} = 252$  Hz), 142.30 (dm,  $^1J_{C,F} = 258$  Hz), 142.29 (s), 138.82 (dm,  $^1J_{C,F} = 255$  Hz), 138.45 (dm,  $^1J_{C,F} = 254$  Hz), 137.18 (dm,  $^1J_{C,F} = 252$  Hz), 134.31 (m,  $o-C^a$ ), 134.22 (d,  $J = 11$  Hz,  $o-C^b$ ), 133.96 (d,  $^4J_{C,P} = 3$  Hz,  $p-C^a$ ), 133.53 (d,  $^4J_{C,P} = 3$  Hz,  $p-C^b$ ), 129.58 (d,  $J = 12.1$  Hz,  $m-C^a$ ), 129.36 (d,  $J = 12.8$  Hz,  $m-C^b$ ), 124.78 (d,  $^1J_{C,P} = 69$  Hz,  $i-C^b$ ), 123.12 (d,  $^1J_{C,P} = 63$  Hz,  $i-C^a$ ), 116.00 (s), 109.85 (t,  $J = 17$  Hz).  $^{19}F\{^1H\}$  NMR (CDCl<sub>3</sub>, 565 MHz):  $\delta$  -124.31 (d,  $J_{F,F} = 16$  Hz, 2F, F-4), -129.14 (d,  $J_{F,F} = 22$  Hz, 2F, F-2'), -135.75 (d,  $J_{F,F} = 18$  Hz, 2F, F-2), -150.48 (t,  $J_{F,F} = 21$  Hz, 2F, F-3), -158.17 (t,  $J_{F,F} = 21$  Hz, 1F, F-5), -159.09 (td,  $J_{F,F} = 22$  and 7 Hz, 2F, F-1'), -161.34 (td,  $J_{F,F} = 23$  and 8 Hz, 2F, F-1).  $^{31}P\{^1H\}$  NMR (CDCl<sub>3</sub>, 243 MHz):  $\delta$  31.67 (s). MS (ESI+, MeCN),  $m/z$  (relative intensity, %): 2008.93 (56) [2M<sup>+</sup> + Na], 1014.96 (100) [M<sup>+</sup> + Na]. HRMS (ESI+, MeCN),  $m/z$ : [M<sup>+</sup> + Na] calcd. for C<sub>36</sub>H<sub>15</sub>F<sub>13</sub>Cl<sub>2</sub>PAuNa, 1014.96386; Found, 1014.96354.

**Synthesis of 2,4,6-(C<sub>6</sub>F<sub>5</sub>)<sub>3</sub>C<sub>6</sub>H<sub>2</sub>AuCl<sub>2</sub>(PPh<sub>3</sub>) (3c).** A 10 mL round bottom flask was charged with 2,4,6-(C<sub>6</sub>F<sub>5</sub>)<sub>3</sub>C<sub>6</sub>H<sub>2</sub>AuPPh<sub>3</sub> (**2c**, 510 mg, 0.5 mmol) and chloroform (7 mL) was added. While stirring continuously, PhICl<sub>2</sub> (150 mg, 0.55 mmol) was added portionwise over 5 min. The mixture was stirred for 2h at room temperature and then petroleum ether (50 mL) was added until no further precipitation was observed. The crude product was collected by filtration, washed with pentane (2 x 20 mL) and dried at reduced pressure to give **3c** as a white solid (440 mg, 80%), m.p. 209 °C (dec.). Suitable crystals for structure determination were obtained after adding petroleum ether over a solution of the compound in CHCl<sub>3</sub> (petroleum ether/CHCl<sub>3</sub> : 4/3, v/v).  $^1H$  NMR (CD<sub>3</sub>CN, 600 MHz):  $\delta$  7.68 (tdd,  $J = 6$ , 3 and 1 Hz, 2H,  $p-H^b$ ), 7.57 (tdt,  $J = 7$ , 2 and 1 Hz, 1H,  $p-H^a$ ), 7.53-7.47 (m, 4H,  $m-H^b$ ), 7.45 (s, 2H, C<sub>6</sub>H<sub>2</sub>), 7.30-7.23 (m, 2H,  $m-H^a$ ), 7.21-7.10 (m, 4H,  $o-H^b$ ), 6.78-6.70 (m, 2H,  $o-H^a$ ).  $^{13}C\{^1H\}$  NMR (CD<sub>3</sub>CN, 151 MHz):  $\delta$  147.67 (s), 146.07 (dm,  $^1J_{C,F} = 249$  Hz), 145.26 (dm,  $^1J_{C,F} = 246$  Hz), 144.92 (dm,  $^1J_{C,F} = 248$  Hz), 142.44 (dm,  $^1J_{C,F} = 254$  Hz), 142.02 (dm,  $^1J_{C,F} = 252$  Hz), 139.03 (dm,  $^1J_{C,F} = 251$  Hz), 138.32 (dm,  $^1J_{C,F} = 251$  Hz), 136.83 (s), 135.31 (dt,  $J = 10$  and 4 Hz,  $o-C^a$ ), 135.09 (d,  $^2J_{C,P} = 1$ ,  $o-C^b$  Hz), 134.39 (d,  $^4J_{C,P} = 3$  Hz,  $p-C^a$ ), 134.31 (d,  $^4J_{C,P} = 3$  Hz,  $p-C^b$ ), 132.58 (s), 130.23 (d,  $^3J_{C,P} = 13$  Hz,  $m-C^a$ ,  $m-C^b$ ), 127.00 (s), 125.95 (d,  $^1J_{C,P} = 69$  Hz,  $i-C^b$ ), 123.89 (d,  $^1J_{C,P} = 64$  Hz,  $i-C^a$ ), 117.46 (td,  $J = 18$ , 4 Hz), 114.36 (td,  $J = 18$ , 4 Hz).  $^{19}F\{^1H\}$  NMR (CD<sub>3</sub>CN, 565 MHz):  $\delta$  -132.93 (dd,  $J_{F,F} = 23$  and 7 Hz, 2F, F-1'), -137.99 (dd,  $J_{F,F} = 24$  and 7 Hz, 2F, F-1), -144.55 (dd,  $J_{F,F} = 22$  and 8 Hz, 2F, F-4), -154.81 (t,  $J_{F,F} = 20$  Hz, 2F, F-3), -156.27 (t,  $J_{F,F} = 20$  Hz, 1F, F-6), -162.82 (td,  $J_{F,F} = 22$  and 8 Hz, 2F, F-2'), -163.53 (td,  $J_{F,F} = 22$  and 7 Hz, 2F, F-2), -164.01 (td,  $J_{F,F} = 22$  and 8 Hz, 2F, F-5).  $^{31}P\{^1H\}$  NMR (CD<sub>3</sub>CN, 243 MHz):  $\delta$  31.82 (s). MS (ESI+, MeCN),  $m/z$  (relative intensity, %): 2232.96 (61) [2M<sup>+</sup> + Na], 1563.05 (28) [M<sup>+</sup> + Au(PPh<sub>3</sub>)], 1126.98 (19) [M<sup>+</sup> + Na], 953.08 (100) [Au<sub>2</sub>Cl(PPh<sub>3</sub>)<sub>2</sub><sup>+</sup>]. HRMS (ESI+, MeCN),  $m/z$ : [M<sup>+</sup> + Na] calcd. for C<sub>42</sub>H<sub>17</sub>F<sub>15</sub>Cl<sub>2</sub>PAuNa, 1126.97631; Found, 1126.97914.



## Through space coupling

For gold(III) complexes **3a-c** the  $^1\text{H}$  NMR and  $^{13}\text{C}$  NMR spectra reveal a 2:1 ( $\text{Ph}^b$  :  $\text{Ph}^a$ ) ratio for the phenyl rings of the phosphane, while  $^{19}\text{F}\{^1\text{H}\}$  NMR spectra show that fluorine atoms in *ortho* and *meta* positions belonging to the flanking  $\text{C}_6\text{F}_5$  groups become unequivalent. Another remarkable feature in their  $^{13}\text{C}$  NMR spectra is the presence of a complex multiplet, instead of a simple doublet, for the carbon atom in *ortho* position of the phenyl lying above the fluorinated ligand ( $\text{Ph}^a$ ). Thus, for example, the multiplet at  $\delta$  135.4 ppm observed for **3b**, in  $\text{CD}_3\text{CN}$  (Figure S1), is in fact a doublet of triplets revealing the expected  $^2J_{\text{CP}}$  coupling (9.9 Hz) and an additional  $^8J_{\text{CF}}$  through-space coupling (4.4 Hz). A similar behavior was also observed for **3a** ( $^8J_{\text{CF}}$  3.8 Hz) and **3c** ( $^8J_{\text{CF}}$  3.8 Hz). The absence of the coupling between fluorine atoms and the *ipso* carbon atom or the phosphorous atom excludes a classical through-bond transmission pathway or *via* intramolecular  $\text{Au}\cdots\text{F}$  contact. Through-space  $^{13}\text{C}$ – $^{19}\text{F}$  coupling up to six bonds have been observed before.<sup>18</sup> However, this is the first report of such coupling occurring between atoms linked through eight covalent bonds. Coupling is most probably transmitted through the intermediate  $\text{C}_o\text{--H}$  bond.<sup>19</sup> Short contact distances between one of the two ( $\text{F},\text{H-ortho}$ ) pairs have been observed in the crystal structures [2.46 Å, **3a**; 2.29 Å, **3b**; 2.64 Å, **3c**]. In solution, the close proximity between the hydrogen atoms attached to  $\text{C}_o$  atoms and the fluorine atoms was confirmed by 2D  $^1\text{H}$ – $^{19}\text{F}$  HOESY experiments (*vide infra* Figure S42 and Figure S47).

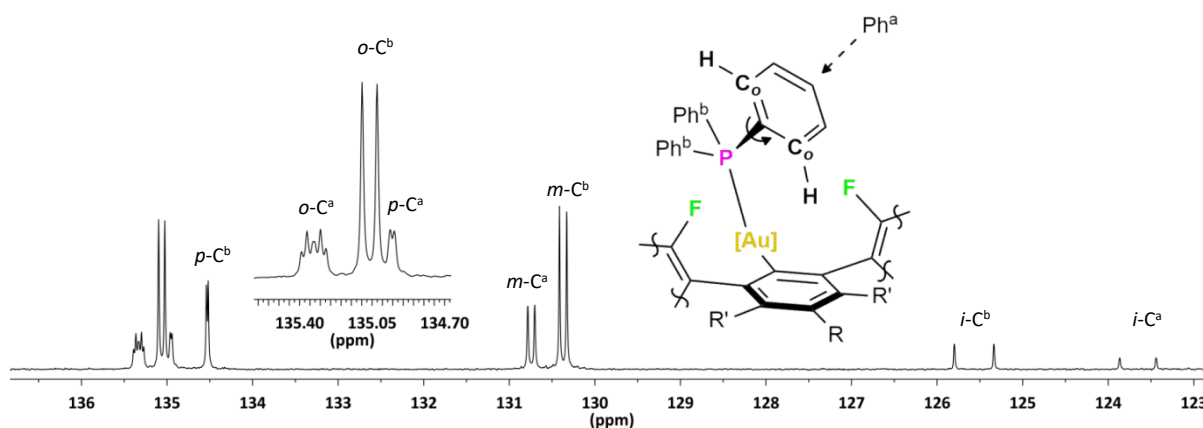

**Figure S1.** Detail from the  $^{13}\text{C}$ -NMR spectrum of **3b** ( $\text{CD}_3\text{CN}$ , 151 MHz) showing the unequivalence of the phenyl rings  $\text{Ph}^a$  and  $\text{Ph}^b$ , in a 1:2 ratio, which results in two sets of corresponding  $^{13}\text{C}$  resonances.

## Crystallographic data

### Tables S1-S6

**Table S1.** Crystal data and structure refinement details for compounds **2a-c** and **3a-c**.

| Compound                                         | <b>2a</b>                                           | <b>2b</b>                                           | <b>2c</b>                                           | <b>3a</b>                                                           | <b>3b</b> ·CHCl <sub>3</sub>                                                          | <b>3c</b> ·CHCl <sub>3</sub>                                                          |
|--------------------------------------------------|-----------------------------------------------------|-----------------------------------------------------|-----------------------------------------------------|---------------------------------------------------------------------|---------------------------------------------------------------------------------------|---------------------------------------------------------------------------------------|
| CCDC no.                                         | 1985132                                             | 1981844                                             | 1985133                                             | 1981845                                                             | 1981847                                                                               | 1981846                                                                               |
| Formula                                          | C <sub>37</sub> H <sub>20</sub> AuF <sub>10</sub> P | C <sub>36</sub> H <sub>15</sub> AuF <sub>13</sub> P | C <sub>42</sub> H <sub>17</sub> AuF <sub>15</sub> P | C <sub>37</sub> H <sub>20</sub> AuCl <sub>2</sub> F <sub>10</sub> P | C <sub>36</sub> H <sub>15</sub> AuCl <sub>2</sub> F <sub>13</sub> P·CHCl <sub>3</sub> | C <sub>42</sub> H <sub>17</sub> AuCl <sub>2</sub> F <sub>15</sub> P·CHCl <sub>3</sub> |
| Formula weight                                   | 882.47                                              | 922.42                                              | 1034.49                                             | 953.37                                                              | 1112.68                                                                               | 1224.76                                                                               |
| Crystal system                                   | triclinic                                           | triclinic                                           | monoclinic                                          | trigonal                                                            | monoclinic                                                                            | monoclinic                                                                            |
| Space group / No.                                | $P\bar{1}$                                          | $P\bar{1}$                                          | $C2/c$                                              | $R\bar{3}$                                                          | $P2_1/c$                                                                              | $P2_1/c$                                                                              |
| a [Å]                                            | 8.861(3)                                            | 13.8553(13)                                         | 22.855(6)                                           | 29.979(5)                                                           | 10.3840(4)                                                                            | 14.723(2)                                                                             |
| b [Å]                                            | 9.823(4)                                            | 14.7279(14)                                         | 18.306(5)                                           | 29.979(5)                                                           | 15.1675(6)                                                                            | 12.1740(18)                                                                           |
| c [Å]                                            | 19.310(7)                                           | 17.3368(16)                                         | 18.308(5)                                           | 23.525(9)                                                           | 24.3914(10)                                                                           | 24.203(4)                                                                             |
| α [°]                                            | 83.090(6)                                           | 77.107(2)                                           | 90                                                  | 90                                                                  | 90                                                                                    | 90                                                                                    |
| β [°]                                            | 89.197(7)                                           | 69.802(2)                                           | 107.093(5)                                          | 90                                                                  | 96.950(4)                                                                             | 99.761(3)                                                                             |
| γ [°]                                            | 77.683(7)                                           | 85.275(2)                                           | 90                                                  | 120                                                                 | 90                                                                                    | 90                                                                                    |
| V [Å <sup>3</sup> ]                              | 1630.0(10)                                          | 3236.4(5)                                           | 7401(3)                                             | 18310(11)                                                           | 3813.4(3)                                                                             | 4275.3(11)                                                                            |
| Z                                                | 2                                                   | 4                                                   | 8                                                   | 18                                                                  | 4                                                                                     | 4                                                                                     |
| D(calc) [g/cm <sup>3</sup> ]                     | 1.798                                               | 1.893                                               | 1.857                                               | 1.556                                                               | 1.938                                                                                 | 1.903                                                                                 |
| μ(MoKα) [mm <sup>-1</sup> ]                      | 4.646                                               | 4.697                                               | 4.126                                               | 3.855                                                               | 4.343                                                                                 | 3.890                                                                                 |
| F(000)                                           | 852                                                 | 1768                                                | 3984                                                | 8280                                                                | 2136                                                                                  | 2360                                                                                  |
| Crystal size [mm]                                | 0.25 x 0.32 x 0.38                                  | 0.34 x 0.39 x 0.40                                  | 0.34 x 0.39 x 0.42                                  | 0.29 x 0.33 x 0.38                                                  | 0.04 x 0.20 x 0.30                                                                    | 0.08 x 0.20 x 0.42                                                                    |
| Temperature (K)                                  | 294(2)                                              | 294(2)                                              | 293(2)                                              | 294(2)                                                              | 200(2)                                                                                | 295(2)                                                                                |
| Radiation [Å]                                    | MoKα / 0.71073                                      | MoKα / 0.71073                                      | MoKα / 0.71073                                      | MoKα / 0.71073                                                      | MoKα / 0.71073                                                                        | MoKα / 0.71073                                                                        |
| Theta min-max [°]                                | 1.1, 25.0                                           | 1.6, 25.1                                           | 1.5, 25.1                                           | 1.2, 25.1                                                           | 1.7, 25.1                                                                             | 1.5, 25.1                                                                             |
| Dataset                                          | ±10; ±11; ±22                                       | ±16; ±17; ±20                                       | ±27; ±21; ±22                                       | ±35; ±35; ±28                                                       | -6: 12; ±18; -28:29                                                                   | ±17; ±14; ±28                                                                         |
| Tot., Uniq. data, R(int)                         | 15854, 5736, 0.049                                  | 31938, 11567, 0.049                                 | 35305, 6634, 0.073                                  | 60731, 7291, 0.186                                                  | 16225, 6834, 0.042                                                                    | 41023, 7654, 0.088                                                                    |
| Observed data<br>[I > 2.0 σ(I)]                  | 4936                                                | 9488                                                | 4920                                                | 3830                                                                | 5806                                                                                  | 6554                                                                                  |
| N <sub>ref</sub> , N <sub>par</sub>              | 5736, 443                                           | 11567, 919                                          | 6634, 532                                           | 7291, 461                                                           | 6834, 514                                                                             | 7654, 586                                                                             |
| R, wR <sub>2</sub> , S                           | 0.0392, 0.1016, 1.03                                | 0.0406, 0.1032, 1.00                                | 0.0593, 0.1164, 1.09                                | 0.0595, 0.1475, 0.90                                                | 0.0355, 0.0733, 1.03                                                                  | 0.0392, 0.0976, 1.00                                                                  |
| Max. and av.<br>shift/error                      | 0.00, 0.00                                          | 0.00, 0.00                                          | 0.00, 0.00                                          | 0.00, 0.00                                                          | 0.00, 0.00                                                                            | 0.00, 0.00                                                                            |
| Min. and max.<br>resd. dens. [e/Å <sup>3</sup> ] | -0.43, 1.32                                         | -0.73, 3.28                                         | -1.01, 1.15                                         | -0.48, 2.14                                                         | -1.34, 0.97                                                                           | -0.92, 0.97                                                                           |

**Table S2.** Molecular parameters (bond lengths in Å and angles in deg) for **3a-c** and related Au(III) complexes.

| Compound          | <b>3a</b> | <b>3b</b> ·CHCl <sub>3</sub> | <b>3c</b> ·CHCl <sub>3</sub> | <i>cis</i> -[Au(2,4,6-C <sub>6</sub> F <sub>3</sub> H <sub>2</sub> )Cl <sub>2</sub> (PPh <sub>3</sub> )] | <i>cis</i> -[Au(C <sub>6</sub> F <sub>5</sub> )Cl <sub>2</sub> (PPh <sub>3</sub> )] | <i>cis</i> -[Au(C <sub>6</sub> F <sub>5</sub> )Cl <sub>2</sub> (PtBu) <sub>3</sub> ] |
|-------------------|-----------|------------------------------|------------------------------|----------------------------------------------------------------------------------------------------------|-------------------------------------------------------------------------------------|--------------------------------------------------------------------------------------|
| Au(1)–C(19)       | 2.035(8)  | 2.040(5)                     | 2.047(4)                     | 2.016(5)                                                                                                 | 2.019(4)                                                                            | 2.033(3)                                                                             |
| Au(1)–P(1)        | 2.321(3)  | 2.325(1)                     | 2.339(2)                     | 2.308(1)                                                                                                 | 2.304(1)                                                                            | 2.416(1)                                                                             |
| Au(1)–Cl(1)       | 2.363(3)  | 2.335(1)                     | 2.352(1)                     | 2.343(1)                                                                                                 | 2.328(1)                                                                            | 2.324(1)                                                                             |
| Au(1)–Cl(2)       | 2.315(3)  | 2.327(1)                     | 2.327(2)                     | 2.334(1)                                                                                                 | 2.314(1)                                                                            | 2.346(1)                                                                             |
| C(19)–Au(1)–P(1)  | 96.6(2)   | 97.2(1)                      | 95.4(1)                      | 91.4(1)                                                                                                  | 91.8(1)                                                                             | 98.8(1)                                                                              |
| P(1)–Au(1)–Cl(1)  | 87.3(1)   | 86.6(1)                      | 88.4(1)                      | 89.2(1)                                                                                                  | 87.8(1)                                                                             | 94.5(1)                                                                              |
| Cl(1)–Au(1)–Cl(2) | 90.0(1)   | 89.2(1)                      | 88.9(1)                      | 92.2(1)                                                                                                  | 92.1(1)                                                                             | 85.4(1)                                                                              |
| Cl(2)–Au(1)–C(19) | 86.4(3)   | 87.2(1)                      | 87.9(1)                      | 87.2(1)                                                                                                  | 88.3(1)                                                                             | 81.4(1)                                                                              |
| C(19)–Au(1)–Cl(1) | 175.4(2)  | 175.6(1)                     | 174.5(1)                     | 178.7(1)                                                                                                 | 177.7(1)                                                                            | 165.8(1)                                                                             |
| P(1)–Au(1)–Cl(2)  | 174.7(1)  | 173.6(1)                     | 173.0(1)                     | 177.6(1)                                                                                                 | 178.6(1)                                                                            | 177.4(1)                                                                             |
| Au(1)–P(1)–C(1)   | 119.6(4)  | 120.2(2)                     | 119.5(2)                     | 113.4(2)                                                                                                 | 113.2(1)                                                                            | 112.2(1)                                                                             |

**Table S3.** Intermolecular C–X···H–C (X = F, Cl) and Au–Cl···H–C contacts below  $\Sigma r_{vdw}(H,F) = 2.57$  Å and  $\Sigma r_{vdw}(H,Cl) = 2.85$  Å.

| Compound                     | interaction* | X···H (Å)  | Y–X···H (deg) | C–H···X (deg) | symmetry operation    |
|------------------------------|--------------|------------|---------------|---------------|-----------------------|
| <b>2a</b>                    | C–F···H–C    | 2.547(5)   | 136.2(4)      | 138.0(6)      | 1–x, –y, 1–z          |
|                              | C–F···H–C    | 2.588(6)** | 135.3(4)      | 173.0(6)      | x, –1+y, z            |
| <b>3a</b>                    | C–F···H–C    | 2.472(7)   | 140.4(8)      | 137.1(10)     | 1/3+y, 2/3–x, 2/3–z   |
|                              | C–F···H–C    | 2.524(11)  | 114.2(9)      | 150.5(10)     | 2/3–x, 1/3–y, 4/3–z   |
| <b>2b</b>                    | C–F···H–C    | 2.490(4)   | 122.5(3)      | 141.0(5)      | 1–x, 1–y, 1–z         |
|                              | C–F···H–C    | 2.534(3)   | 153.9(3)      | 134.8(5)      | –x, –y, 1–z           |
| <b>3b</b> ·CHCl <sub>3</sub> | C–F···H–C    | 2.444(3)   | 147.0(3)      | 136.3(3)      | 1+x, y, z             |
|                              | C–F···H–C    | 2.462(3)   | 121.2(3)      | 139.2(4)      | 1–x, 1–y, 1–z         |
|                              | Au–Cl···H–C  | 2.750(1)   | 157.2(1)      | 152.3(4)      | 3/2–x, –1/2+y, 1/2–z  |
| <b>2c</b>                    | C–F···H–C    | 2.572(8)   | 155.1(7)      | 142.2(6)      | x, 1–y, 1/2+z         |
| <b>3c</b> ·CHCl <sub>3</sub> | C–F···H–C    | 2.564(6)   | 148.2(5)      | 161.5(3)      | –1/2+x, –1/2+y, 1/2–z |
|                              | Au–Cl···H–C  | 2.581(1)   | 92.8(1)       | 153.7(4)      | x, y, z               |
|                              | Au–Cl···H–C  | 2.807(2)   | 86.7(1)       | 131.6(4)      | x, y, z               |
|                              | C–Cl···H–C   | 2.940(1)** | 104.6(2)      | 165.0(5)      | 1–x, –y, 1–z          |

\* The atoms on the left side of the interaction belong to the (x,y,z) molecule, while the atoms on the right side of the interaction belong to the molecule generated by the symmetry operation listed on the last column of the table.

\*\* Interactions at distances slightly larger than  $\Sigma r_{vdw}$  were included if they had very good geometrical arrangements.

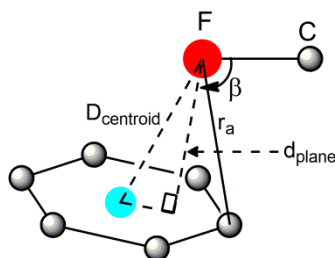

Figure S2. Definition of geometrical C-F... $\pi_F$  parameters.

Table S4. Intermolecular C-F... $\pi_F$  interactions having at least one F...C( $r_a$ ) contact below  $\Sigma r_{vdw}(C,F) = 3.17 \text{ \AA}$ .

| Compound             | interaction type | $d_{\text{plane}}$ (Å) | contact* (Å)  | $r_a$ (Å) | $D_{\text{centroid}}$ (Å) | $\beta$ (deg) | symmetry operation |
|----------------------|------------------|------------------------|---------------|-----------|---------------------------|---------------|--------------------|
| 2a                   | parallell offset | 2.927(7)               | F(4)...C(30)  | 3.113(11) | 3.440(5)                  | 89.4(5)       | $-x, 2-y, -z$      |
|                      |                  |                        | C(30)...F(4)  | 3.113(11) |                           |               |                    |
| 2b                   | vertex to face   | 3.066(4)               | F(8)...C(72)  | 3.204(9)  | 3.098(4)                  | 31.6(3)       | $-x, 1-y, 1-z$     |
|                      | vertex to face   | 2.913(5)               | F(16)...C(28) | 2.997(8)  | 3.569(5)                  | 52.4(3)       | $1-x, -y, -z$      |
|                      | parallell offset | 2.797(4)               | F(7)...C(63)  | 3.135(8)  | 3.766(4)                  | 89.2(3)       | $-1+x, y, z$       |
|                      |                  |                        | C(33)...F(15) | 3.171(7)  |                           |               |                    |
|                      | parallell offset | 2.580(4)               | F(11)...C(59) | 3.175(6)  | 3.881(3)                  | 83.8(3)       | $x, y, -1+z$       |
|                      |                  |                        | F(11)...C(58) | 3.156(7)  |                           |               |                    |
| edge to face         | 2.916(3)         | F(13)...C(36)          | 3.076(6)      | 3.707(3)  | 34.6(3)                   | $-x, 1-y, -z$ |                    |
|                      |                  | 2.884(3)               | F(12)...C(35) | 3.024(7)  | 3.692(3)                  | 34.3(3)       |                    |
| 3b·CHCl <sub>3</sub> | vertex to face   | 2.982(3)               | F(9)...C(28)  | 2.992(7)  | 3.216(4)                  | 32.1(4)       | $1-x, 1-y, 1-z$    |
| 2c                   | parallell offset | 2.729(6)               | F(10)...C(29) | 3.121(14) | 3.748(7)                  | 83.7(4)       | $1-x, y, 1/2-z$    |
| 3c·CHCl <sub>3</sub> | parallell offset | 2.669(5)               | F(9)...C(35)  | 3.137(8)  | 3.891(5)                  | 89.5(4)       | $-x, -y, 1-z$      |

\* The atoms on the left side of the interaction belong to the (x,y,z) molecule, while the atoms on the right side of the interaction belong to the molecule generated by the symmetry operation listed on the last column of the table.

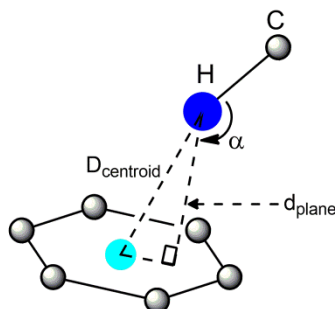

Figure S3. Definition of geometrical C-H... $\pi$  parameters.

Table S5. Intermolecular C-H... $\pi$  interactions ( $D_{\text{centroid}} < 3 \text{ \AA}$ ).

| compound | interaction*                          | $d_{\text{plane}}$ (Å) | $D_{\text{centroid}}$ (Å) | $\alpha$ (deg) | symmetry operation      |
|----------|---------------------------------------|------------------------|---------------------------|----------------|-------------------------|
| 2b       | C(4)-H(4)...Ph <sub>(C54-C60)</sub>   | 2.84                   | 2.85                      | 160            | $-x, -y, 1-z$           |
|          | C(40)-H(40)...Ph <sub>(C19-C24)</sub> | 2.84                   | 2.96                      | 139            | $1-x, 1-y, -z$          |
| 3a       | C(23)-H(23)...Ph <sub>(C1-C6)</sub>   | 2.94                   | 2.98                      | 123            | $2/3-y, 1/3+x-y, 1/3-z$ |

\* The atoms on the left side of the interaction belong to the (x,y,z) molecule, while the phenyl rings on the right side of the belong to the molecule generated by the symmetry operation listed on the last column of the table.

Table S6. Intermolecular  $\pi$ ... $\pi$  stacking interactions, not included among C-F... $\pi_F$  (interplanar distance  $< 3.8 \text{ \AA}$ , slippage  $< 2 \text{ \AA}$ ).

| compound | interaction*                                       | Ph <sub>centroid</sub> ...Ph <sub>centroid</sub> (Å) | interplanar distance (Å) | Slippage (Å) | symmetry operation |
|----------|----------------------------------------------------|------------------------------------------------------|--------------------------|--------------|--------------------|
| 2c       | Ph <sub>(C37-C42)</sub> ...Ph <sub>(C37-C42)</sub> | 3.480(7)                                             | 3.467(5)                 | 0.306        | $1-x, y, 1/2-z$    |

\* The phenyl ring on the left side of the interaction belongs to the (x,y,z) molecule, while the phenyl rings on the right side of the interaction belong to the molecule generated by the symmetry operation listed on the last column of the table.

Figures S4-S12

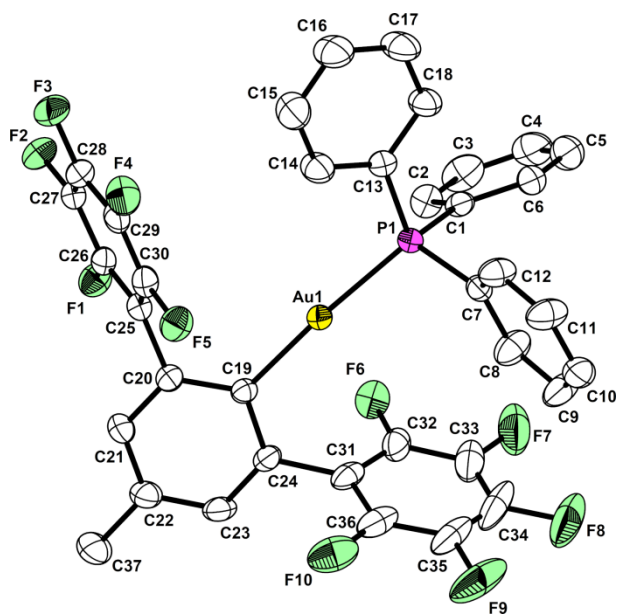

Figure S4. Molecular structure of **2a**. Thermal ellipsoid are shown at 25% probability level. Hydrogen atoms have been omitted for clarity

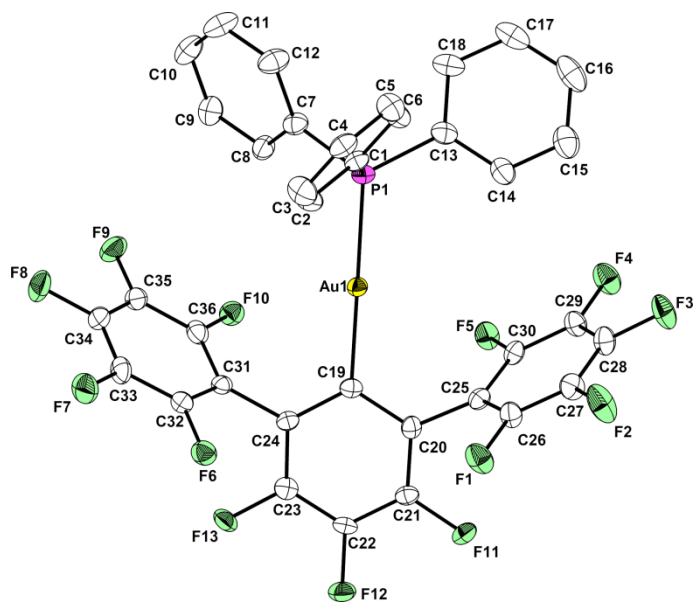

Figure S5. Molecular structure of **2b**. Thermal ellipsoid are shown at 25% probability level. Hydrogen atoms have been omitted for clarity.

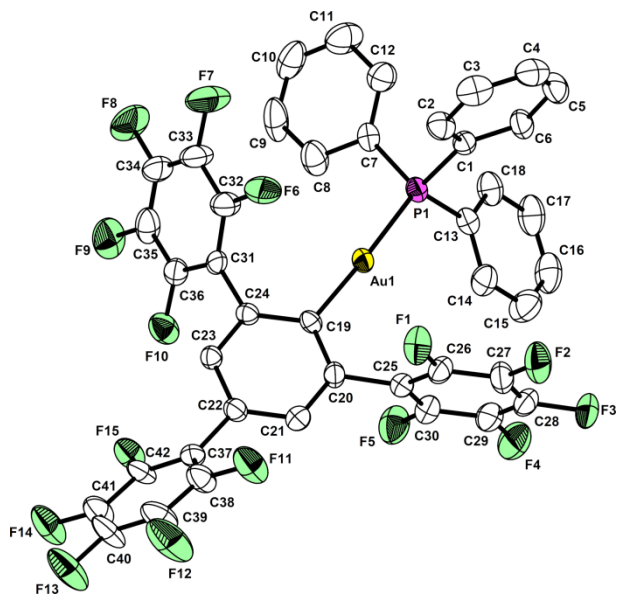

**Figure S6.** Molecular structure of **2c**. Thermal ellipsoid are shown at 25% probability level. Hydrogen atoms have been omitted for clarity.

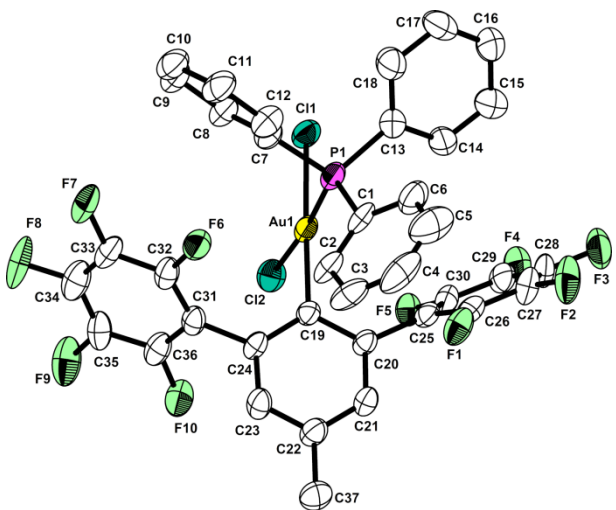

**Figure S7.** Molecular structure of **3a**. Thermal ellipsoid are shown at 25% probability level. Hydrogen atoms have been omitted for clarity.

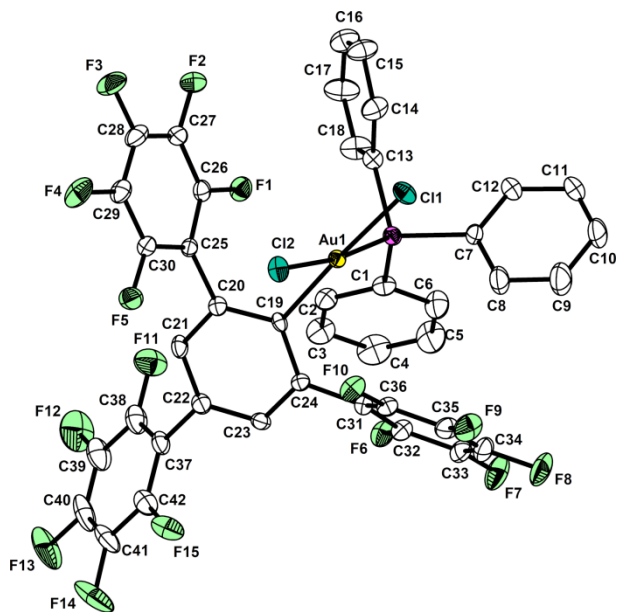

**Figure S8.** Molecular structure of **3c**·CHCl<sub>3</sub>. Thermal ellipsoid are shown at 25% probability level. Hydrogen atoms and the solvent molecule have been omitted for clarity.

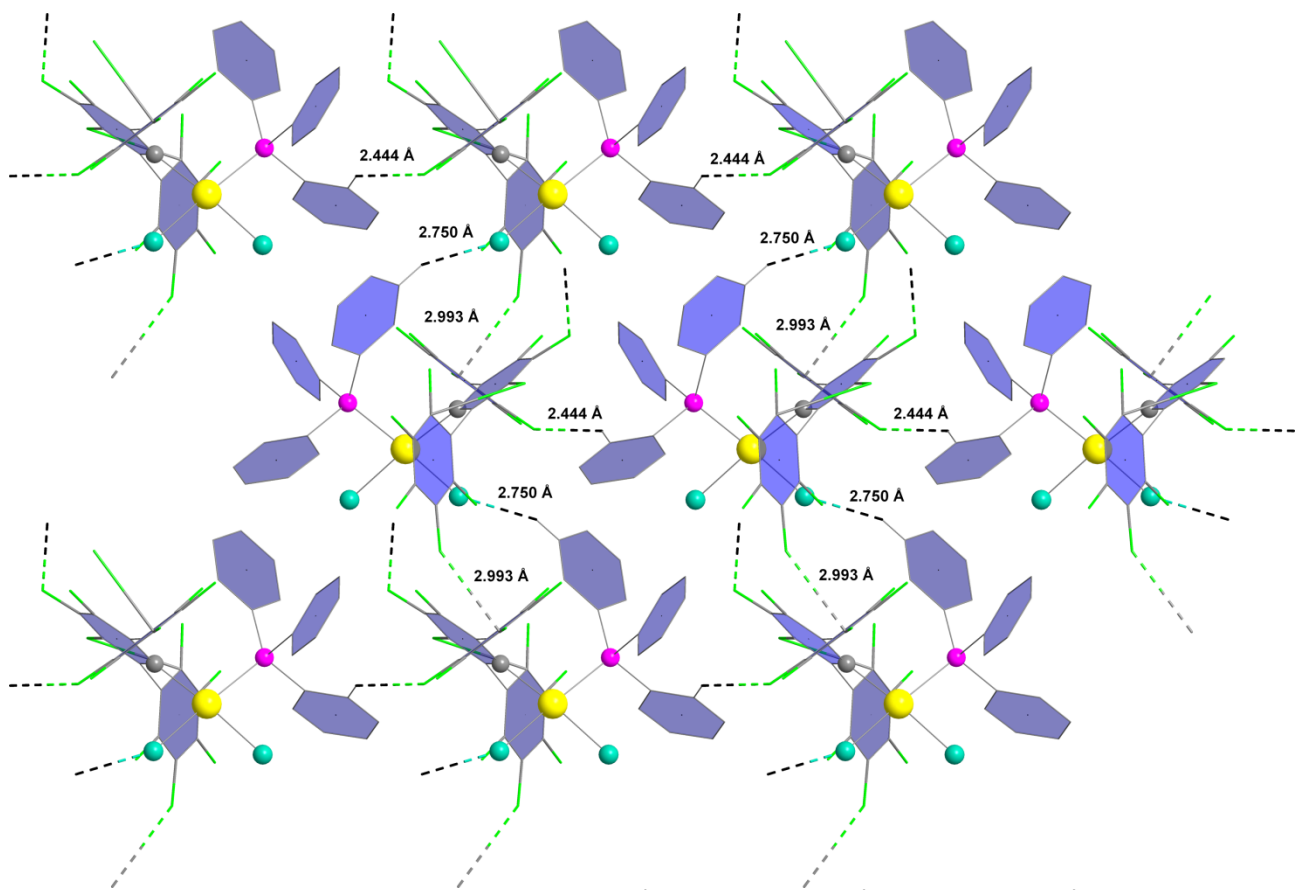

**Figure S9.** One layer of **3b** molecules interconnected by C-F $\cdots$  $\pi$ F (2.993 Å, cf.  $\Sigma r_{vdW}(C,F)$  = 3.17 Å), C-Cl $\cdots$ H-C (2.750 Å, cf.  $\Sigma r_{vdW}(H,Cl)$  = 2.85 Å) and C-F $\cdots$ H-C (2.444 Å, cf.  $\Sigma r_{vdW}(F,H)$  2.57 Å) interactions. Colour coding: Au = yellow, C = grey, Cl = turquoise, P = pink.

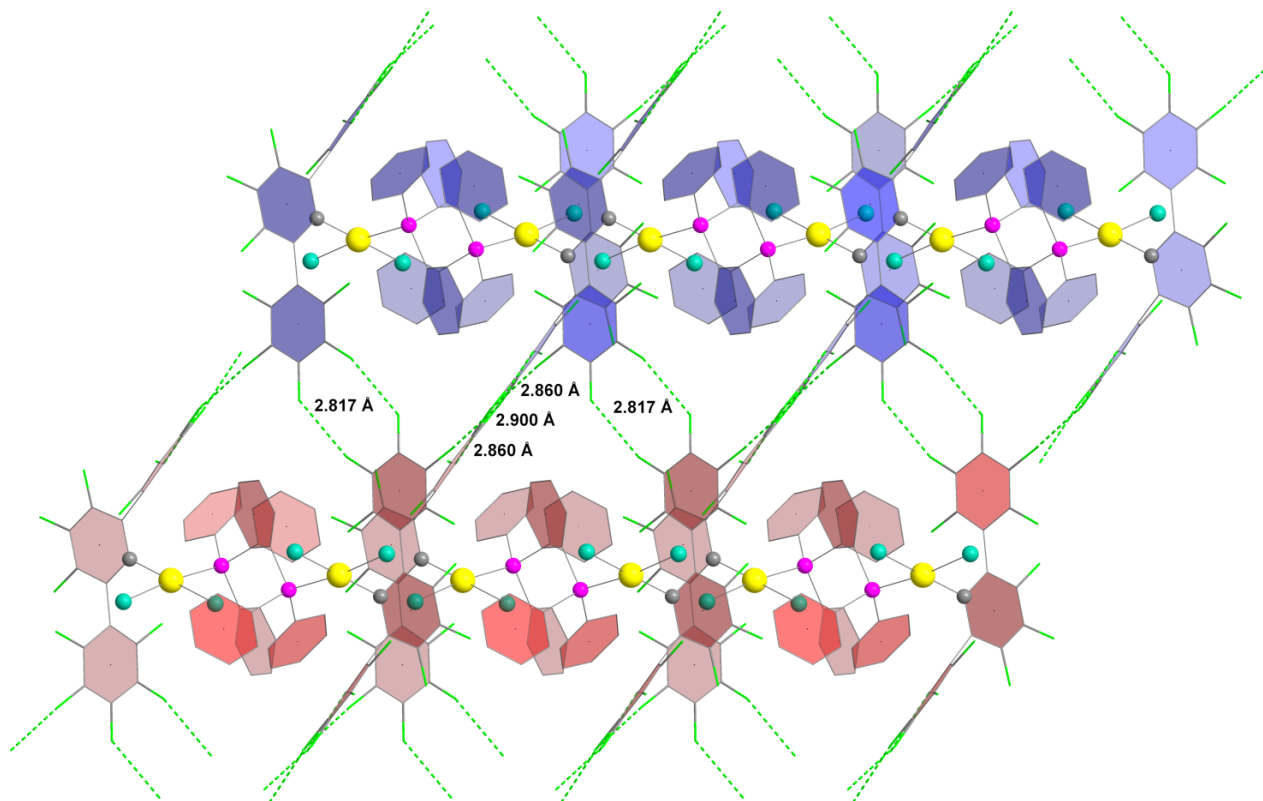

**Figure S10.** Two layers of **3b** molecules (red and blue phenyl rings for different layers) connected by three cooperative F...F interactions (one at 2.817 Å and two coplanar at 2.860 Å and 2.900 Å; cf.  $\Sigma r_{vdw}(F,F)$  2.94 Å, view along *b* axis). Colour coding: Au = yellow, C = grey, Cl = turquoise, P = pink.

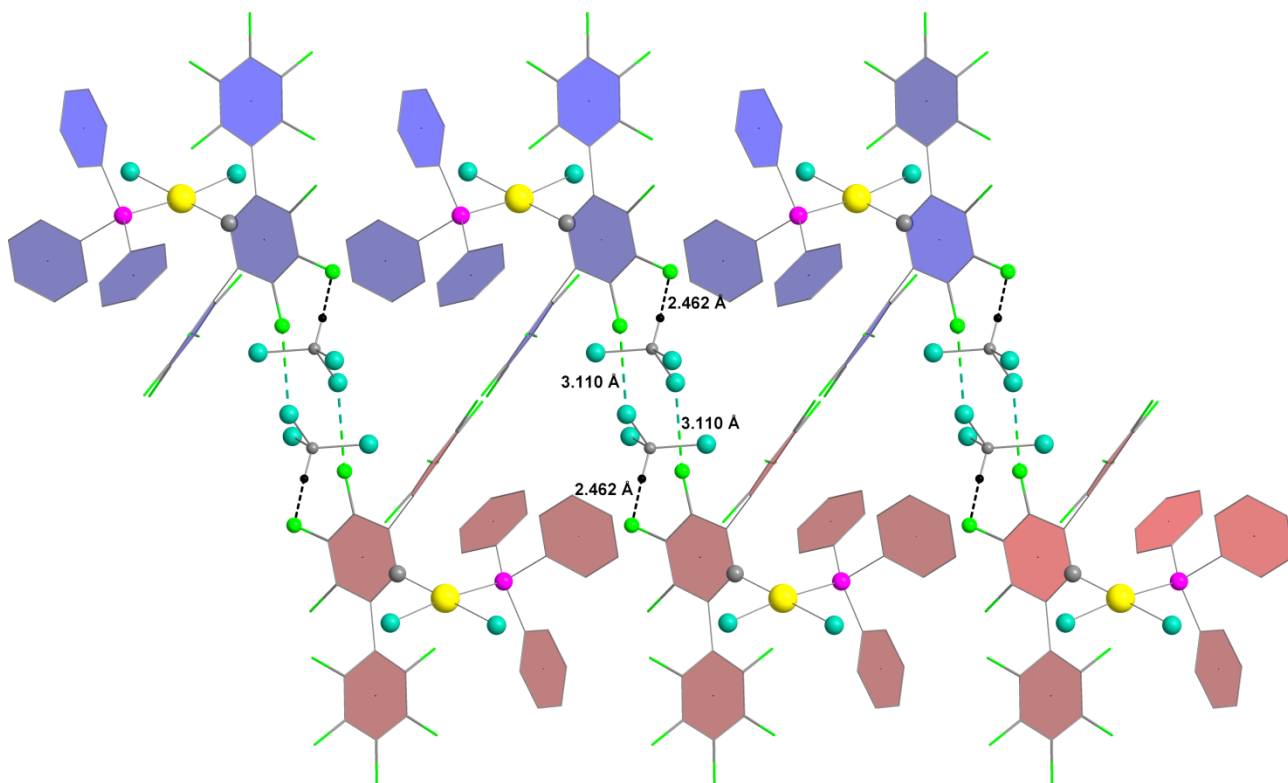

**Figure S11.** Additional weak type I F...Cl (3.11 Å;  $\Sigma r_{vdw}(F,Cl)$  3.22 Å) hetero-halogen interaction between the layers of **3b** molecules, assisted by a C...F...H...C interaction (2.462 Å, cf.  $\Sigma r_{vdw}(F,H)$  2.57 Å). Colour coding: Au = yellow, C = grey, F = green, Cl = turquoise, P = pink.



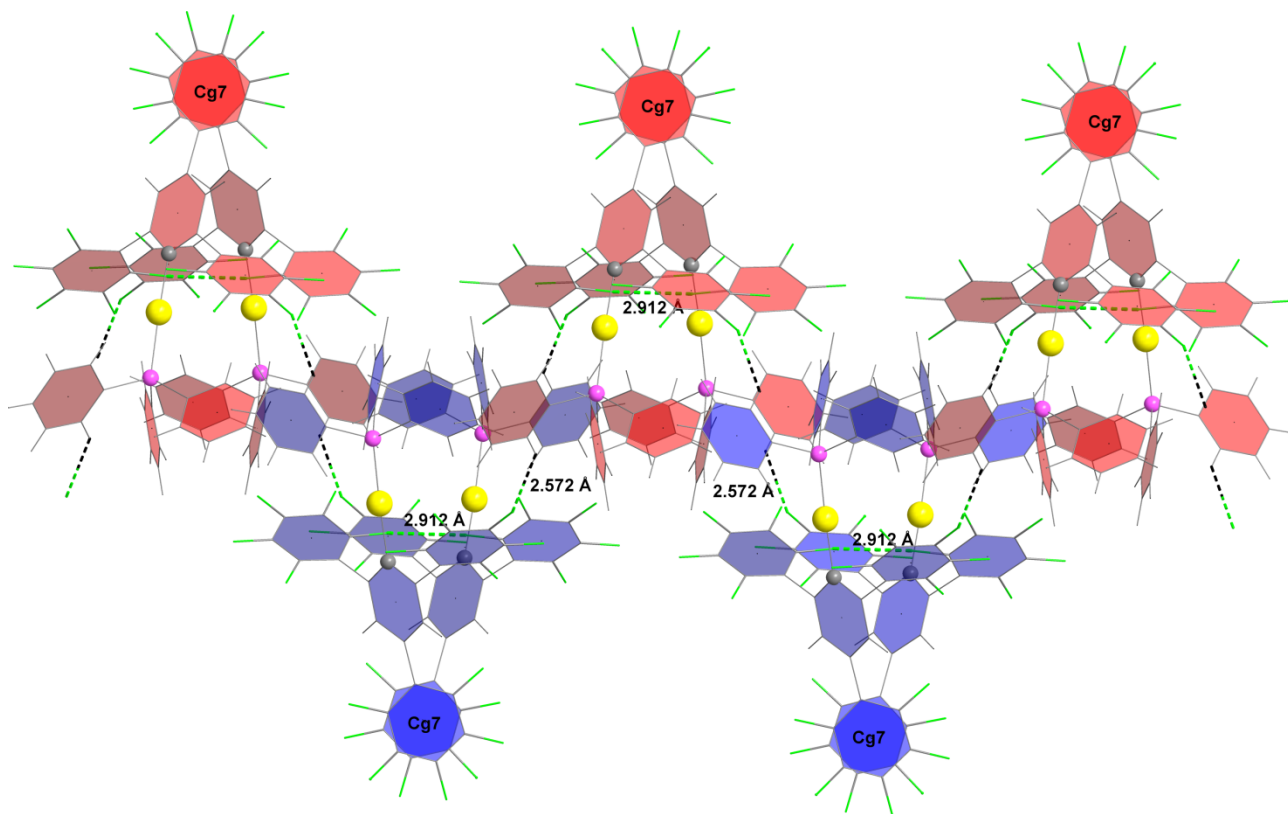

**Figure S12.** Weakly bound supramolecular chains built from dimer pairs of **2c** molecules connected by weak  $\pi\cdots\pi$  stacking (staggered Cg7...Cg7 = 3.48 Å), further linked by C-F...H-C (2.572 Å; cf.  $\Sigma r_{vdw}(F,H)$  2.57 Å) and F...F (2.912 Å; cf.  $\Sigma r_{vdw}(F,F)$  2.94 Å) interactions. Colour coding: Au = yellow, C = grey, P = pink.

# NMR spectra

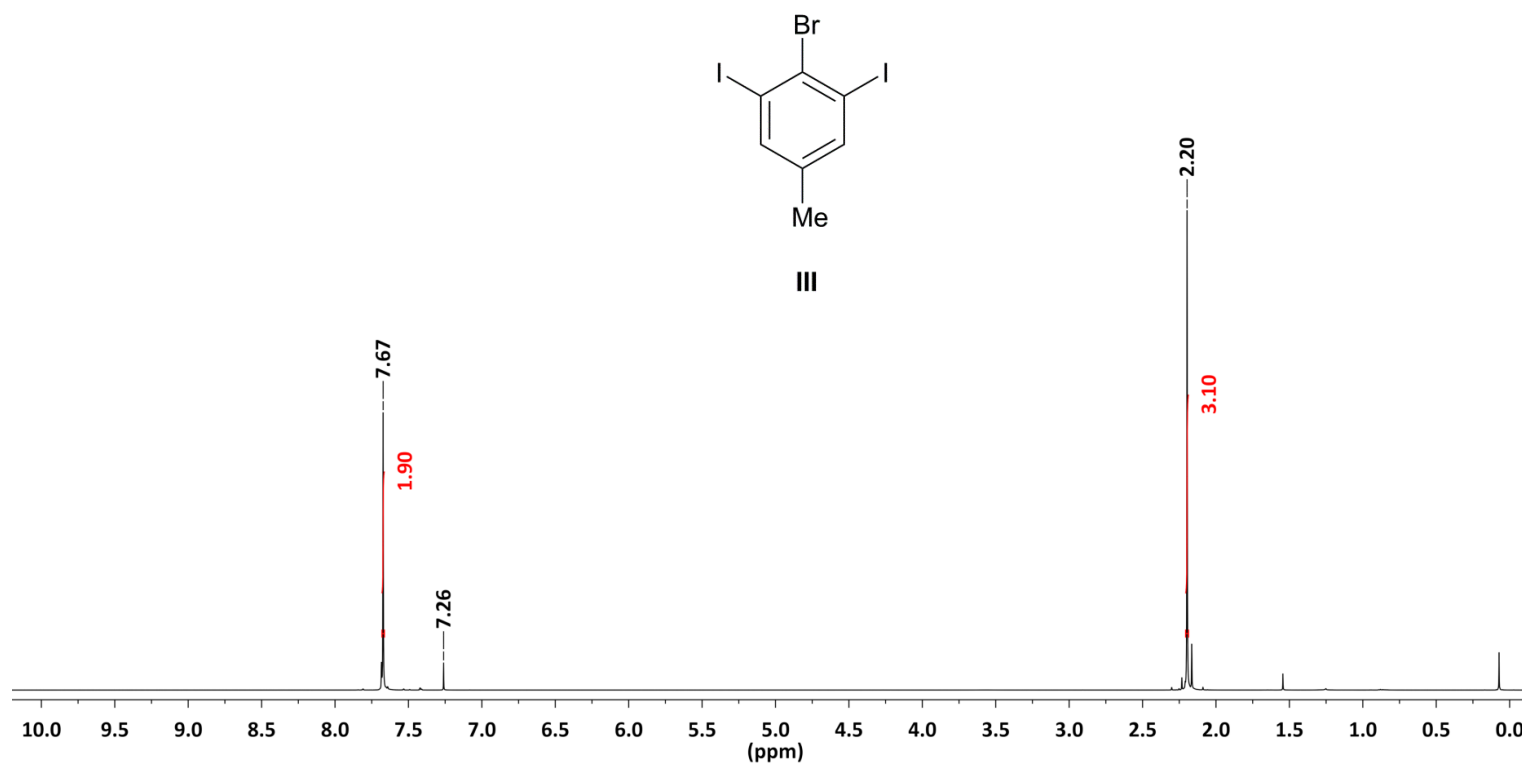

Figure S13. <sup>1</sup>H NMR (CDCl<sub>3</sub>, 400 MHz) spectrum of 2,6-I<sub>2</sub>-4-MeC<sub>6</sub>H<sub>2</sub>Br (III).

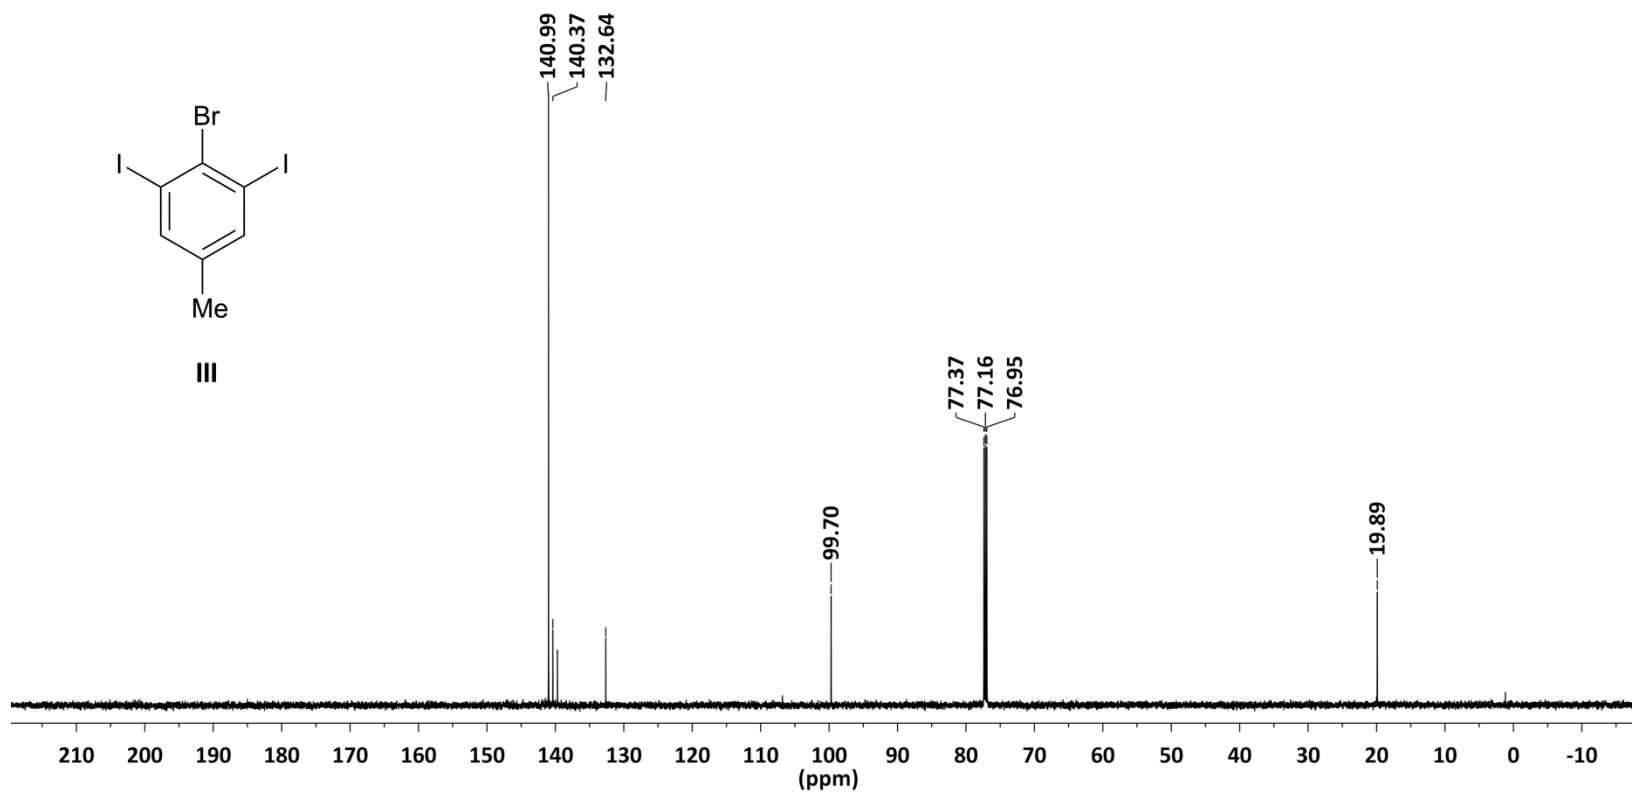

Figure S14.  $^{13}\text{C}\{^1\text{H}\}$  NMR (CDCl<sub>3</sub>, 101 MHz) spectrum of 2,6-I<sub>2</sub>-4-MeC<sub>6</sub>H<sub>2</sub>Br (III).

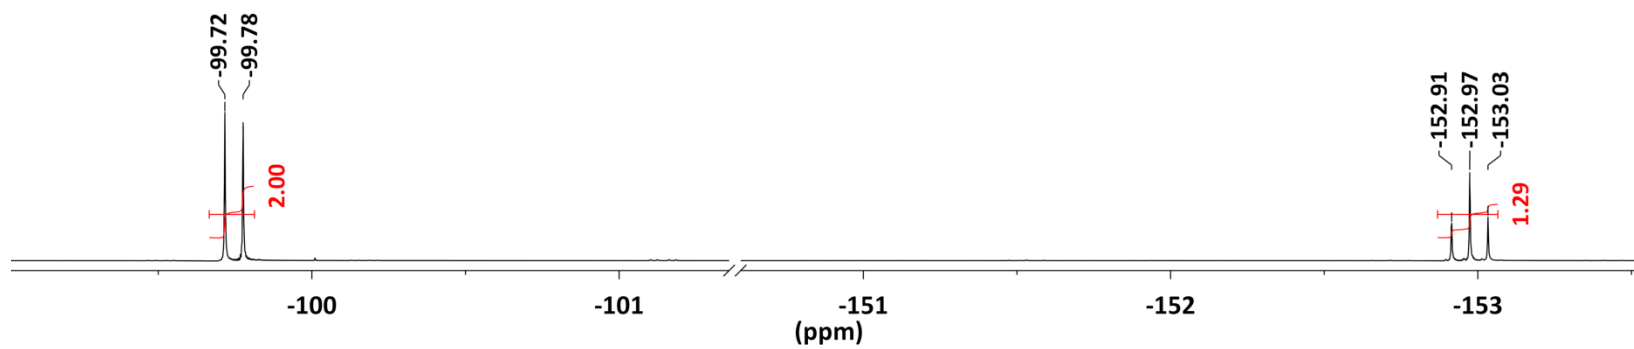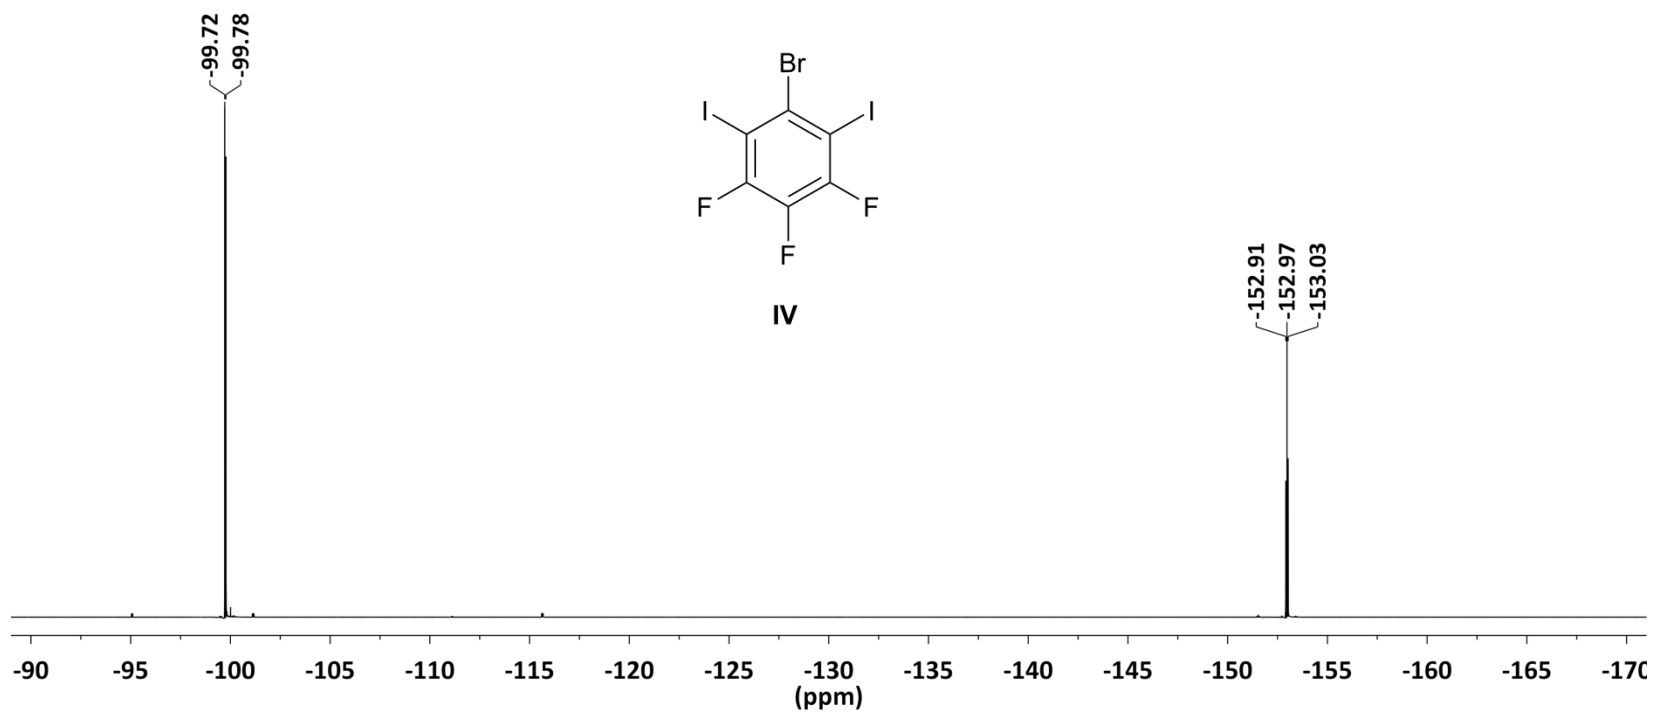

Figure S15.  $^{19}\text{F}\{^1\text{H}\}$  NMR ( $\text{CDCl}_3$ , 376 MHz) spectrum of 2,6- $\text{I}_2\text{-C}_6\text{F}_3\text{Br}$  (IV).

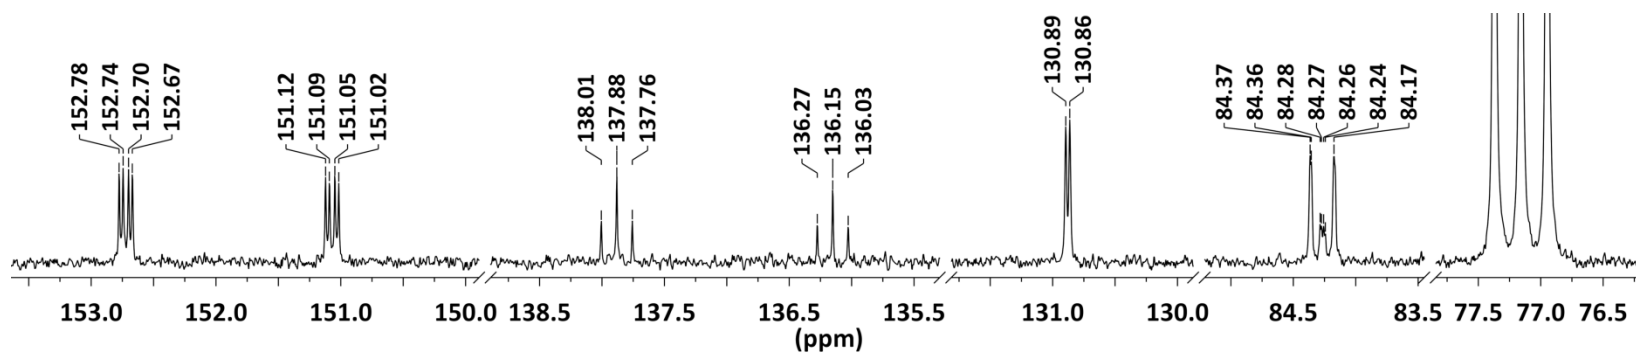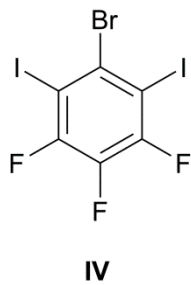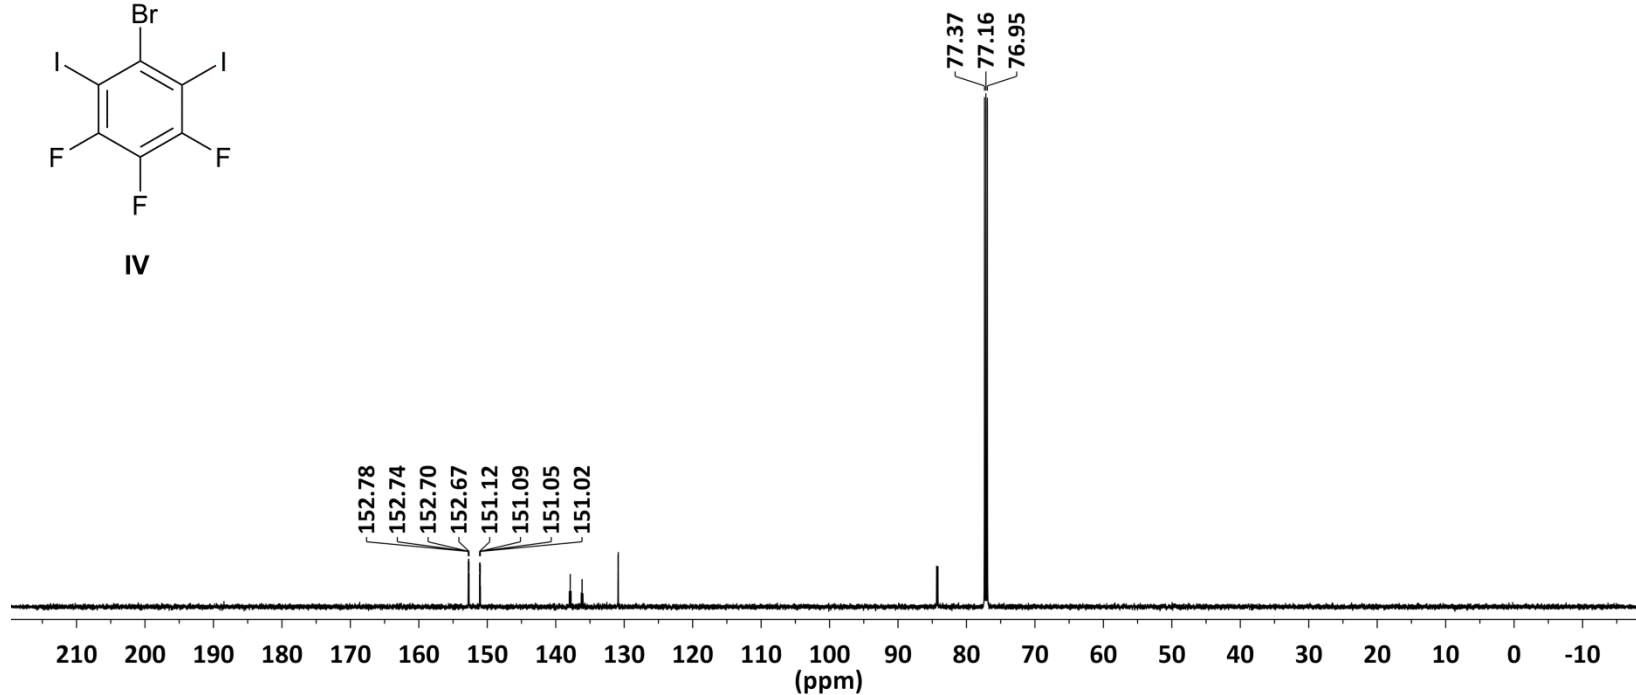

Figure S16.  $^{13}\text{C}\{^1\text{H}\}$  NMR ( $\text{CDCl}_3$ , 151 MHz) spectrum of 2,6- $\text{I}_2\text{-C}_6\text{F}_3\text{Br}$  (IV).

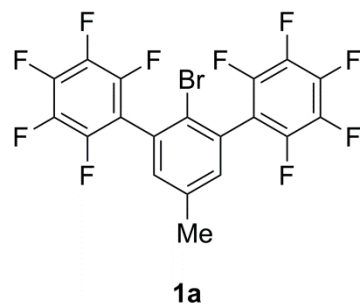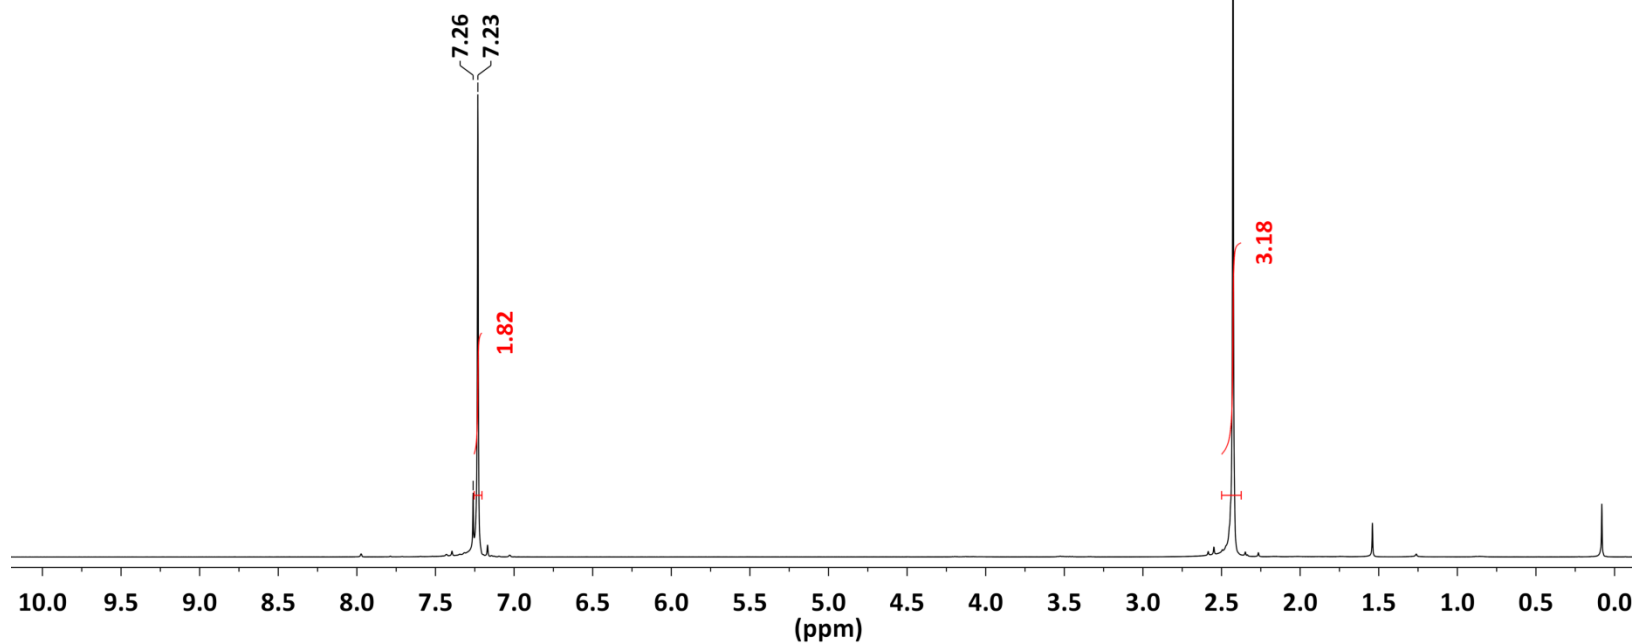

Figure S17.  $^1\text{H}$  NMR ( $\text{CDCl}_3$ , 400 MHz) spectrum of 2,6-( $\text{C}_6\text{F}_5$ )-4-Me $\text{C}_6\text{H}_2\text{Br}$  (**1a**).

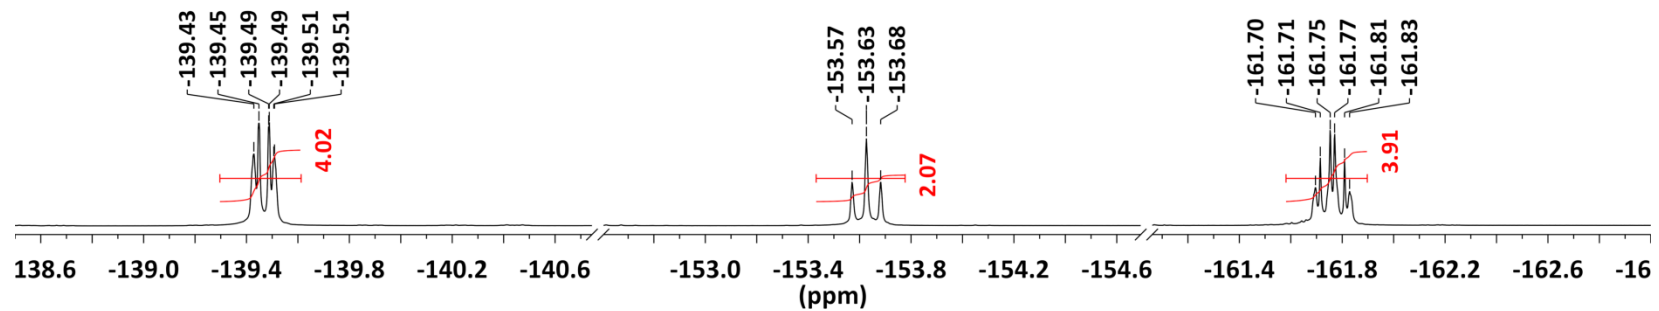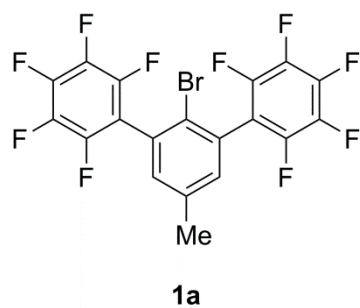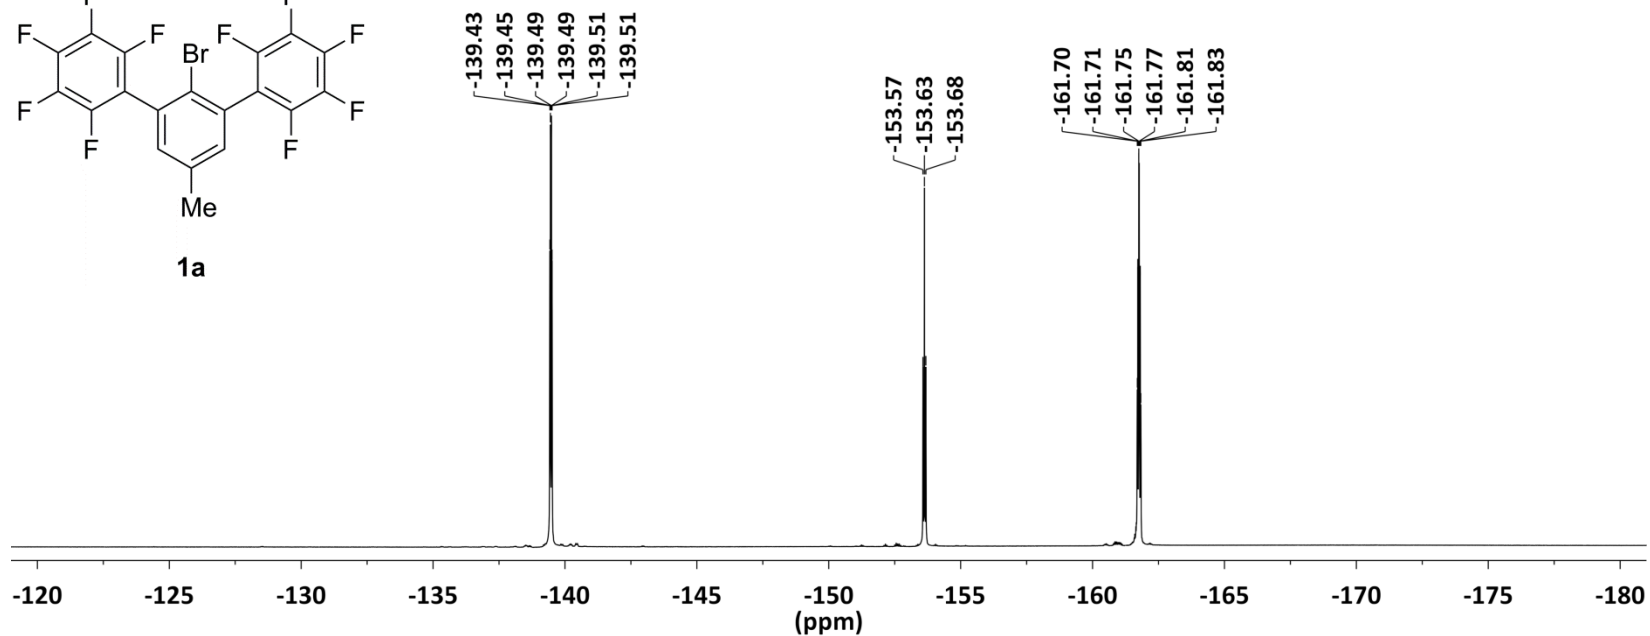

Figure S18.  $^{19}\text{F}\{^1\text{H}\}$  NMR ( $\text{CDCl}_3$ , 376 MHz) spectrum of 2,6-( $\text{C}_6\text{F}_5$ )-4-Me $\text{C}_6\text{H}_2\text{Br}$  (**1a**).

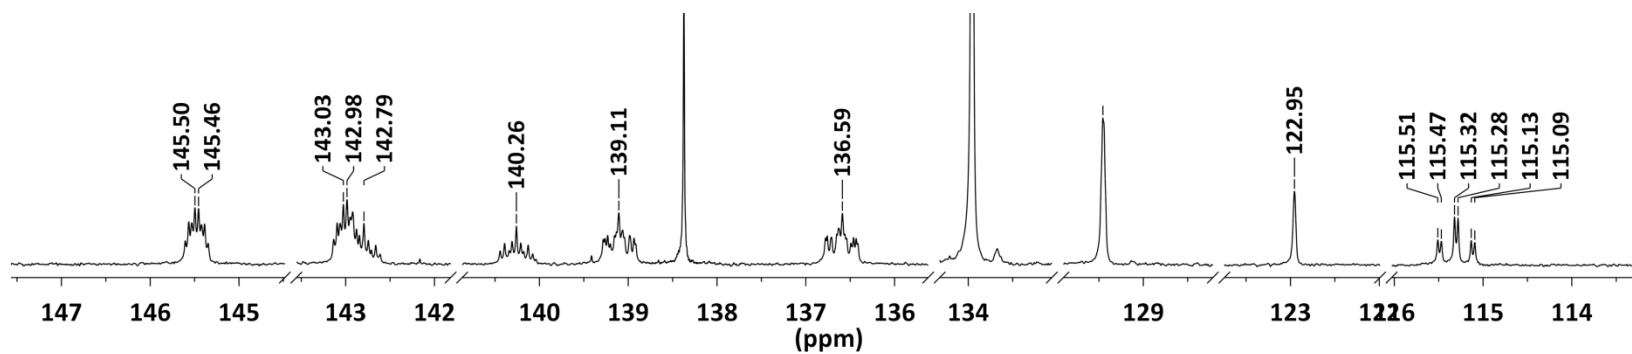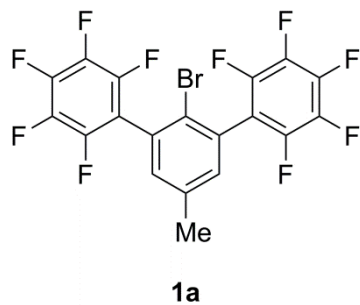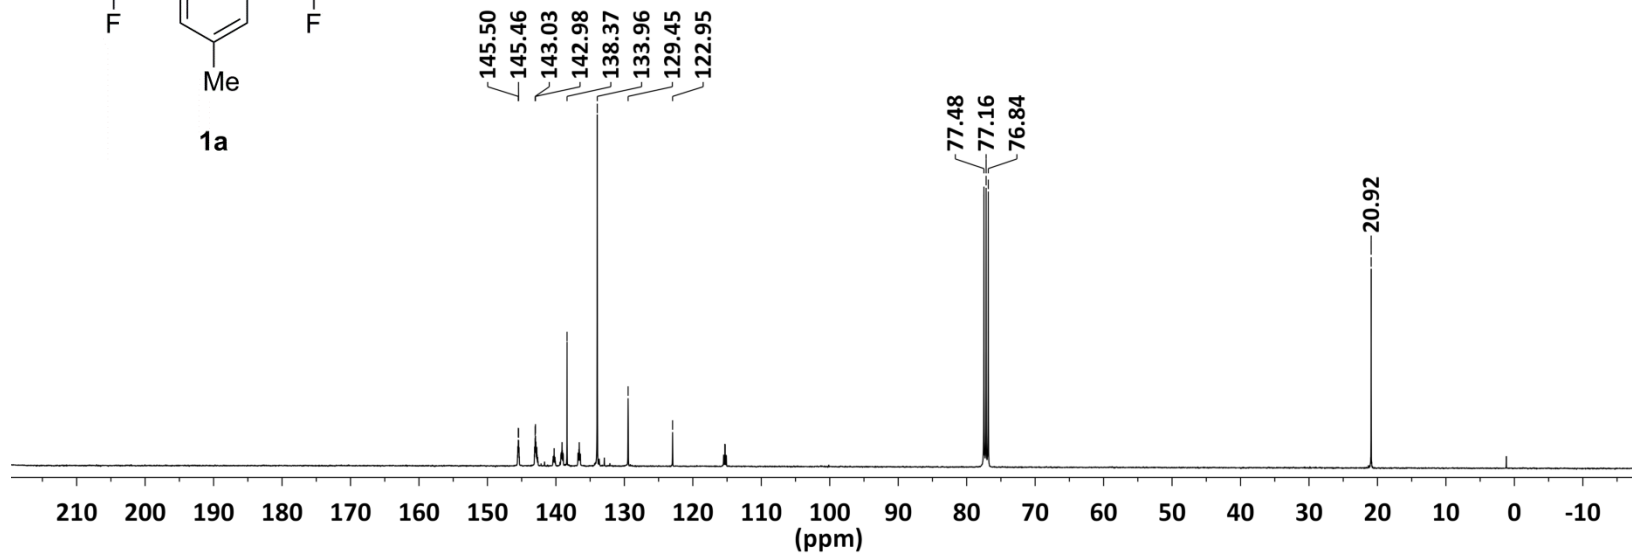

Figure S19.  $^{13}\text{C}\{^1\text{H}\}$  NMR ( $\text{CDCl}_3$ , 101 MHz) spectrum of 2,6-( $\text{C}_6\text{F}_5$ )-4-Me $\text{C}_6\text{H}_2\text{Br}$  (**1a**).



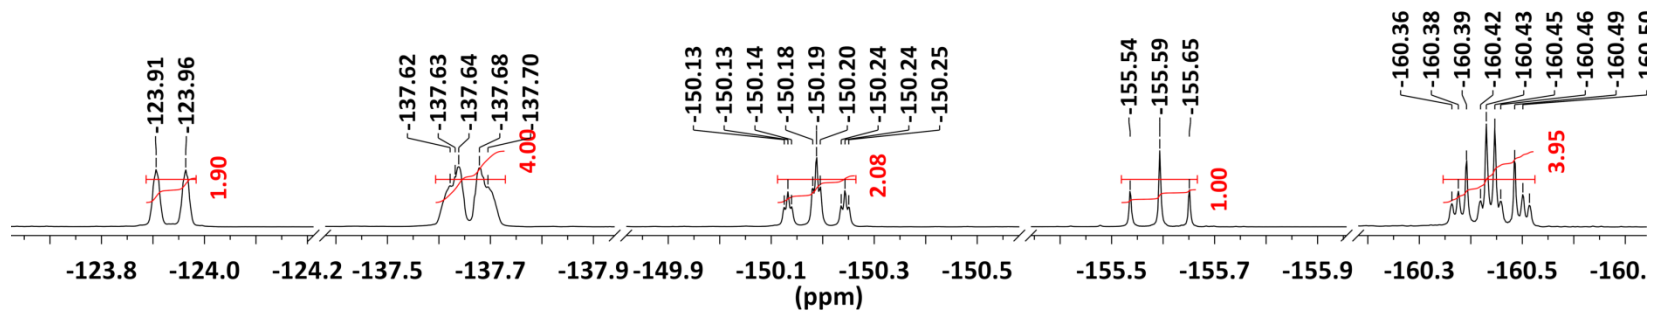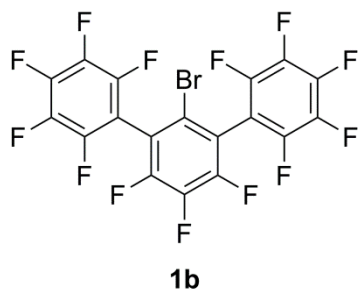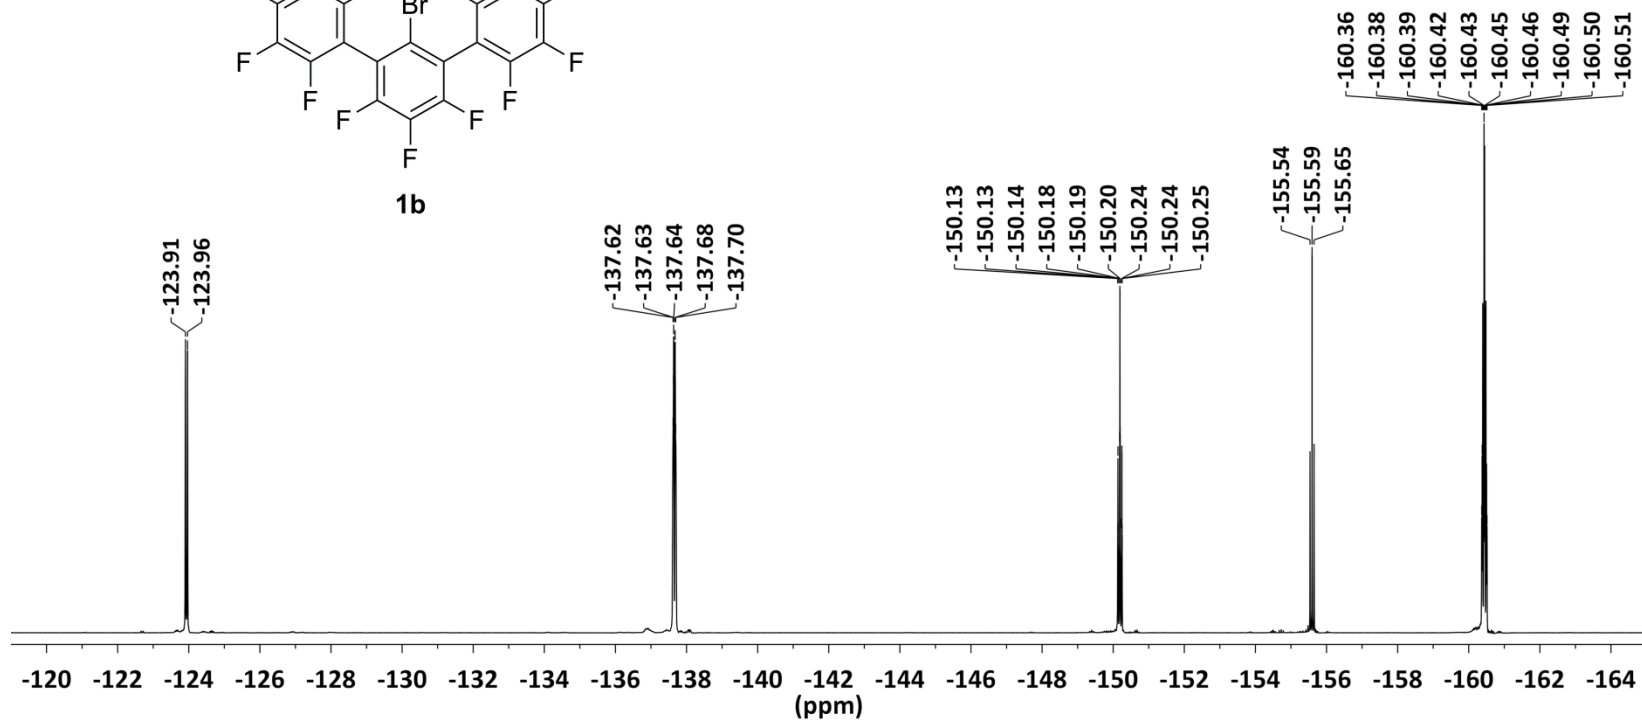

Figure S20. <sup>19</sup>F{<sup>1</sup>H} NMR (CDCl<sub>3</sub>, 376 MHz) spectrum of 2,6-(C<sub>6</sub>F<sub>5</sub>)-C<sub>6</sub>F<sub>3</sub>Br (**1b**).

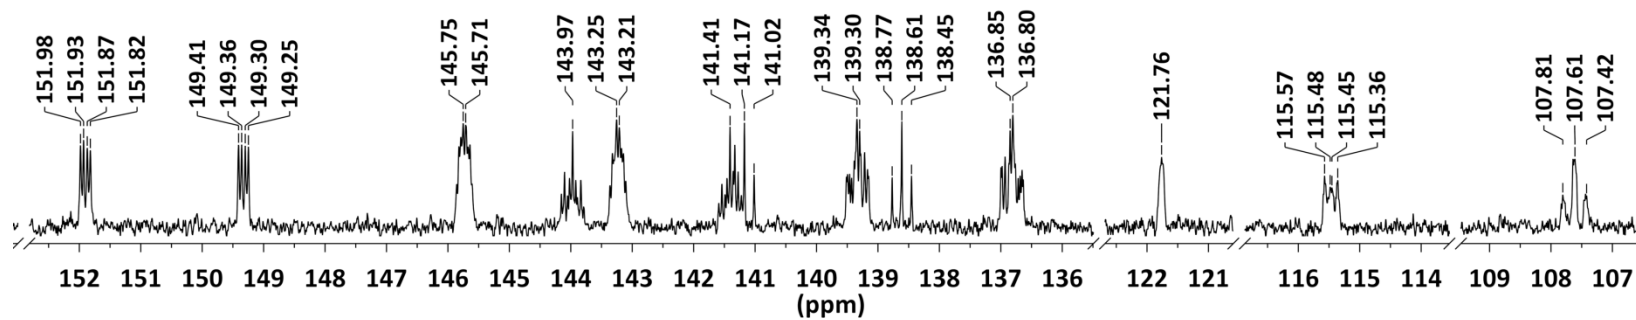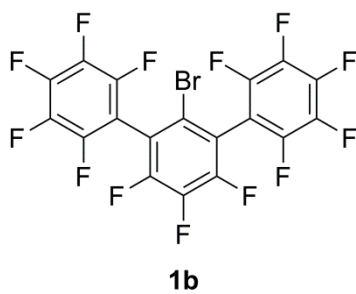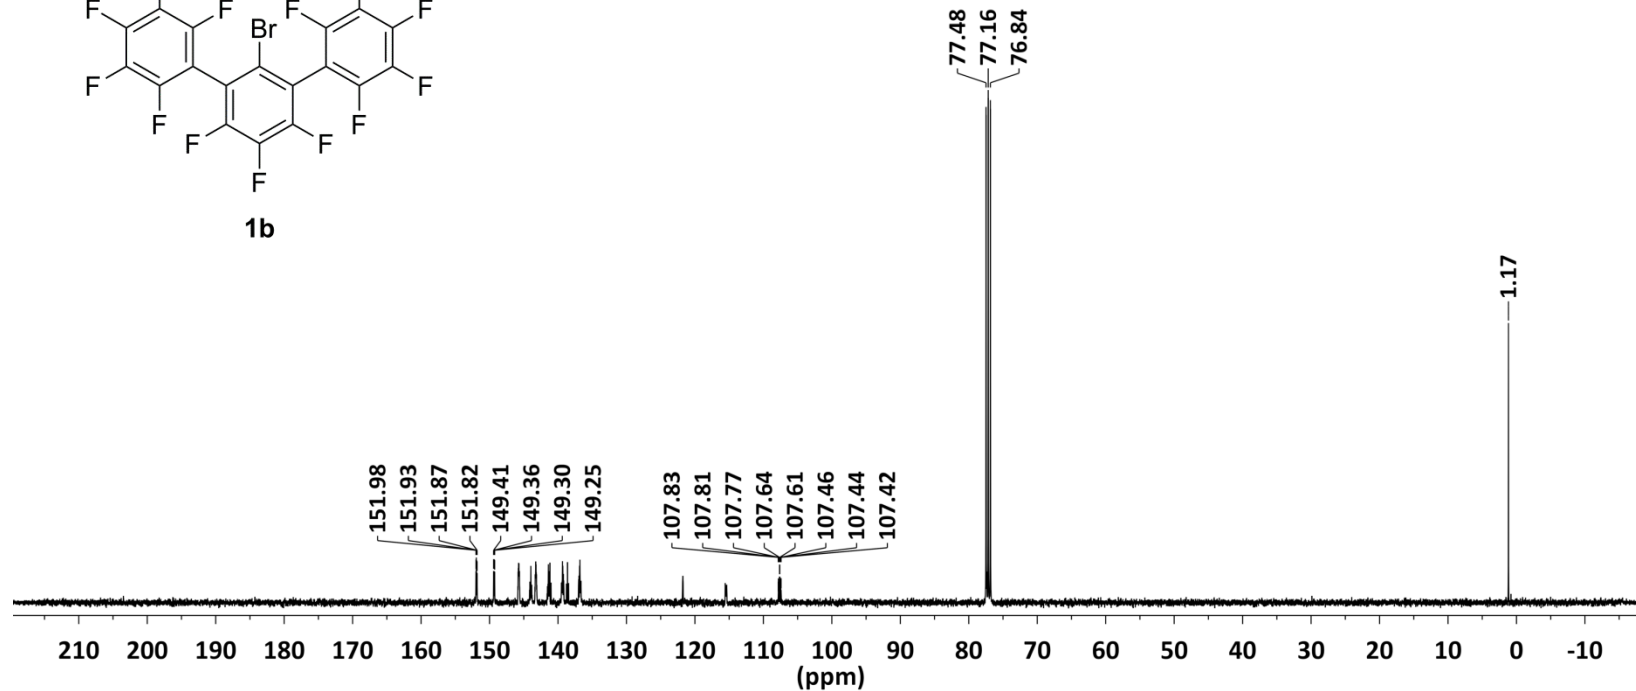

Figure S21.  $^{13}\text{C}\{^1\text{H}\}$  NMR ( $\text{CDCl}_3$ , 101 MHz) spectrum of 2,6-( $\text{C}_6\text{F}_5$ )- $\text{C}_6\text{F}_3\text{Br}$  (**1b**).

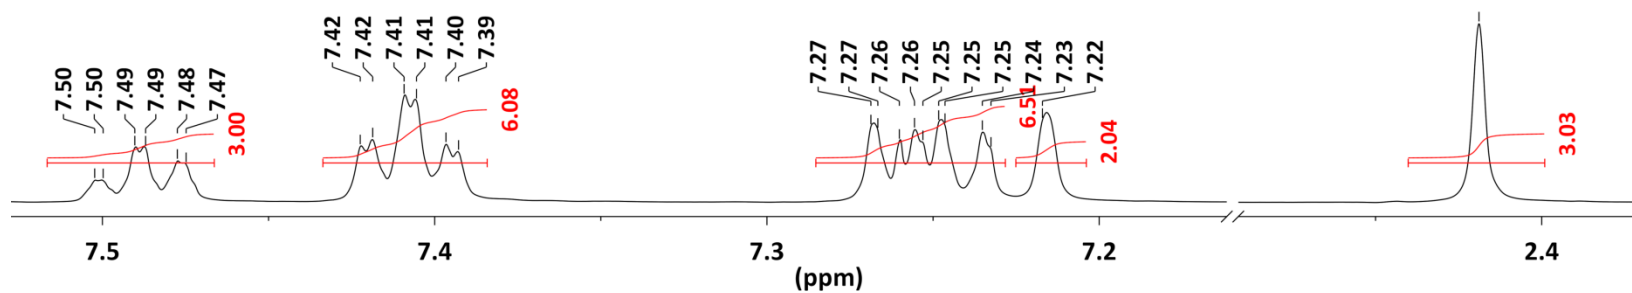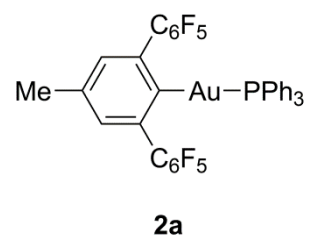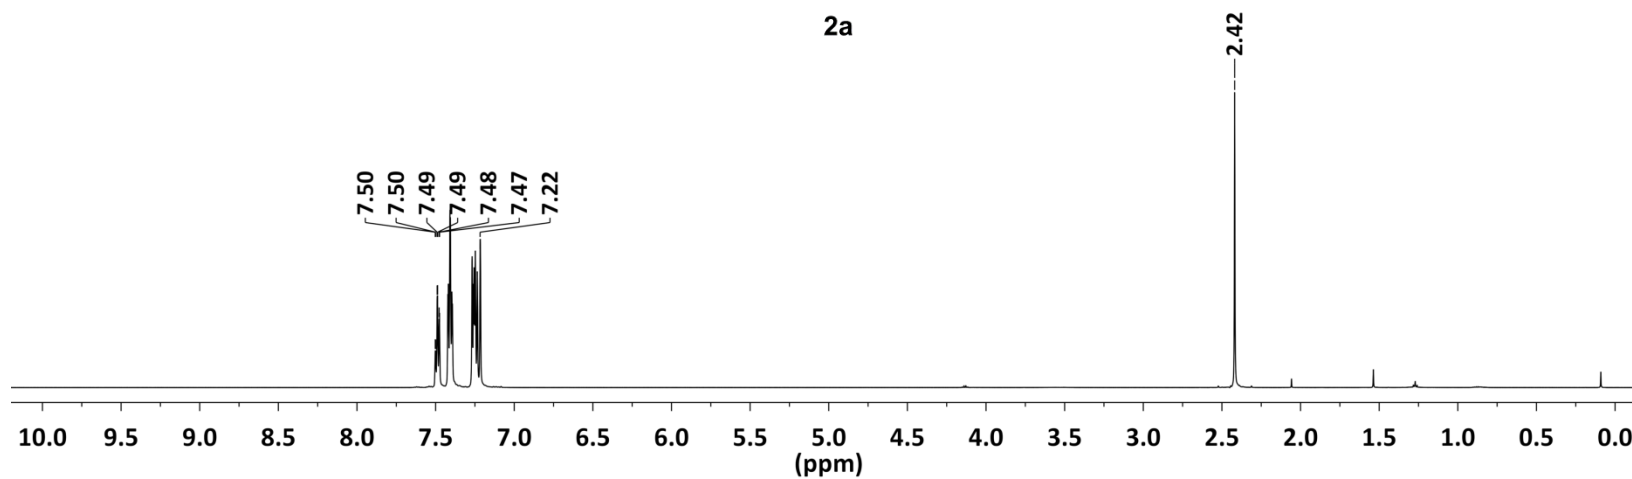

Figure S22.  $^1\text{H}$  NMR ( $\text{CDCl}_3$ , 600 MHz) spectrum of 2,6-( $\text{C}_6\text{F}_5$ ) $_2$ -4-Me $\text{C}_6\text{H}_2\text{Au}(\text{PPh}_3)$  (**2a**).

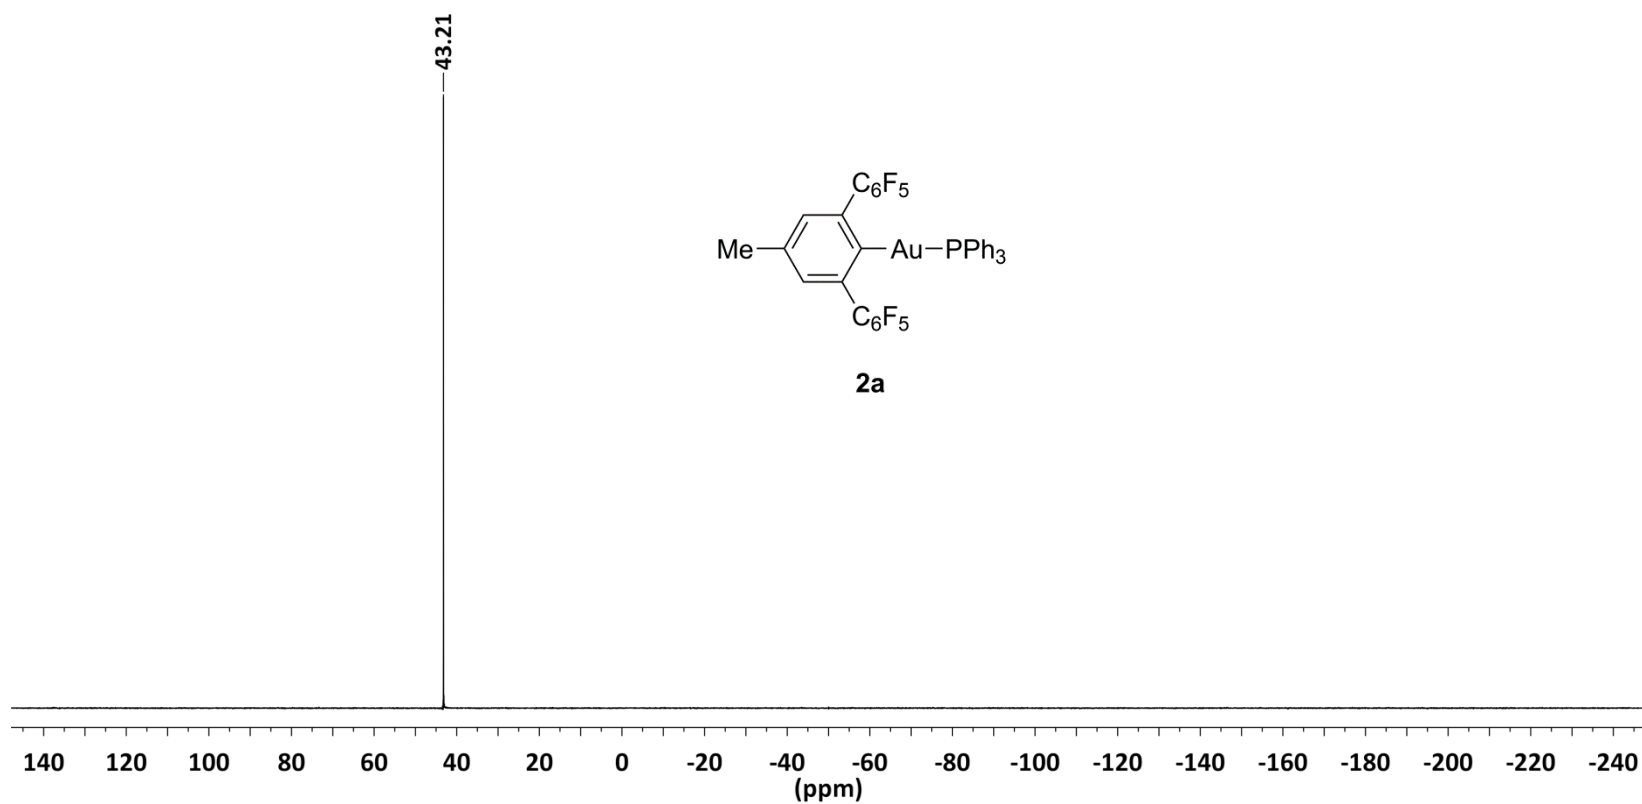

Figure S23.  $^{31}\text{P}\{^1\text{H}\}$  NMR ( $\text{CDCl}_3$ , 243 MHz) spectrum of 2,6-( $\text{C}_6\text{F}_5$ )<sub>2</sub>-4-MeC<sub>6</sub>H<sub>2</sub>Au( $\text{PPh}_3$ ) (**2a**).

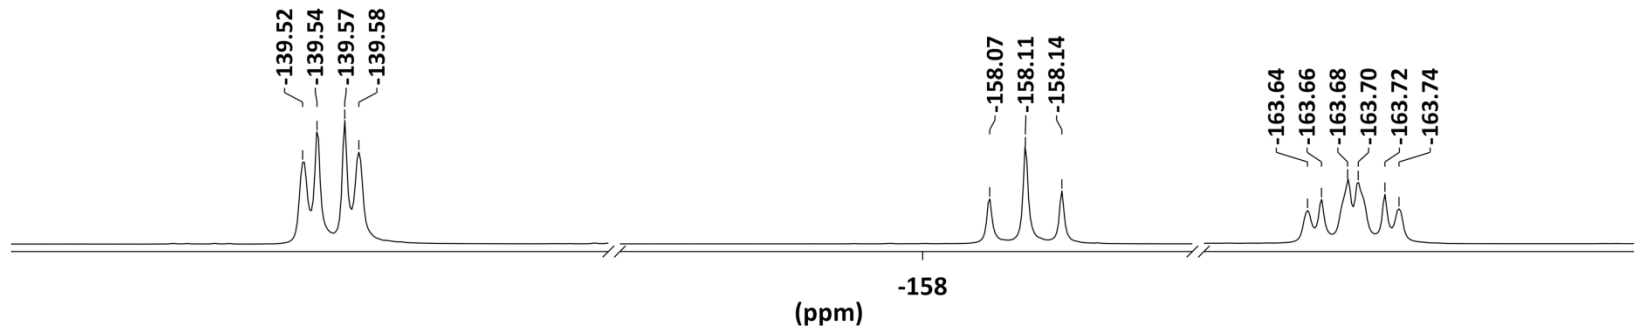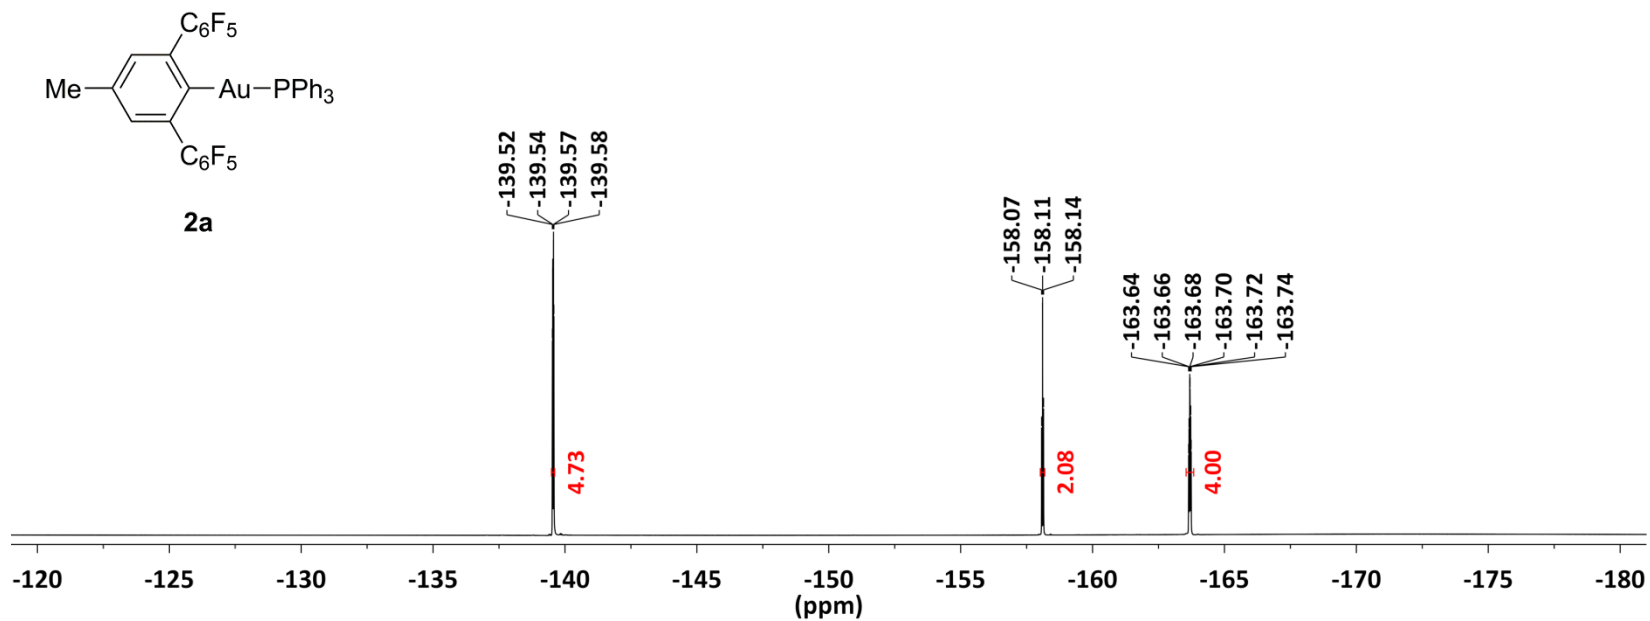

Figure S24.  $^{19}\text{F}\{^1\text{H}\}$  NMR ( $\text{CDCl}_3$ , 565 MHz) spectrum of 2,6-( $\text{C}_6\text{F}_5$ ) $_2$ -4-Me $\text{C}_6\text{H}_2\text{Au}(\text{PPh}_3)$  (**2a**).

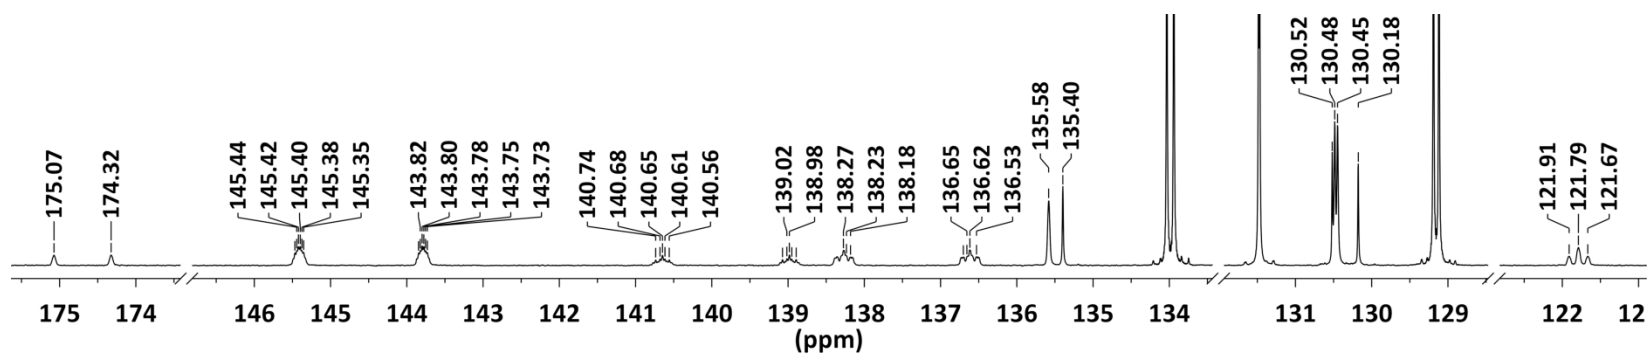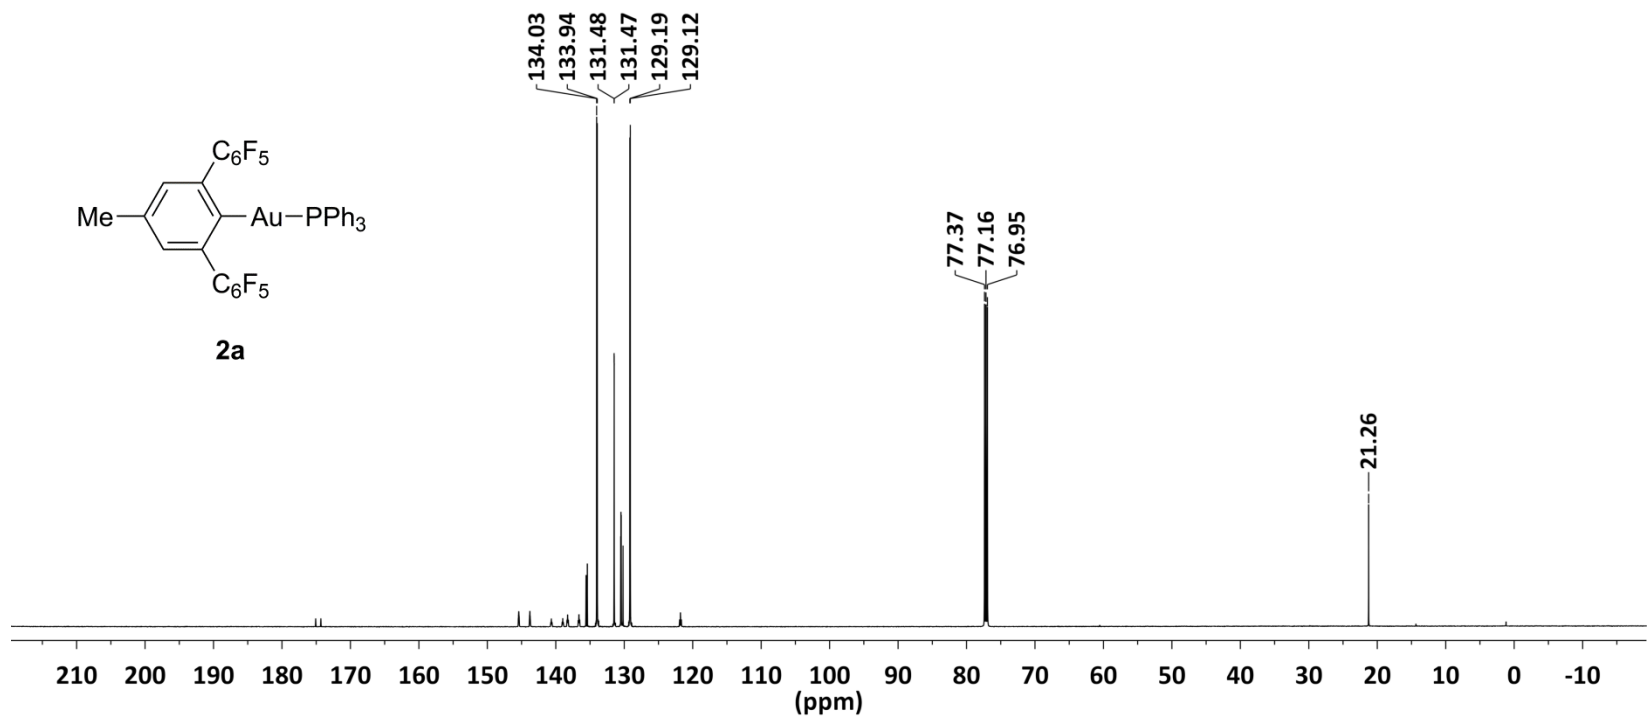

Figure S25.  $^{13}\text{C}\{^1\text{H}\}$  NMR ( $\text{CDCl}_3$ , 151 MHz) spectrum of 2,6-( $\text{C}_6\text{F}_5$ ) $_2$ -4-Me $\text{C}_6\text{H}_2\text{Au}(\text{PPh}_3)$  (**2a**).

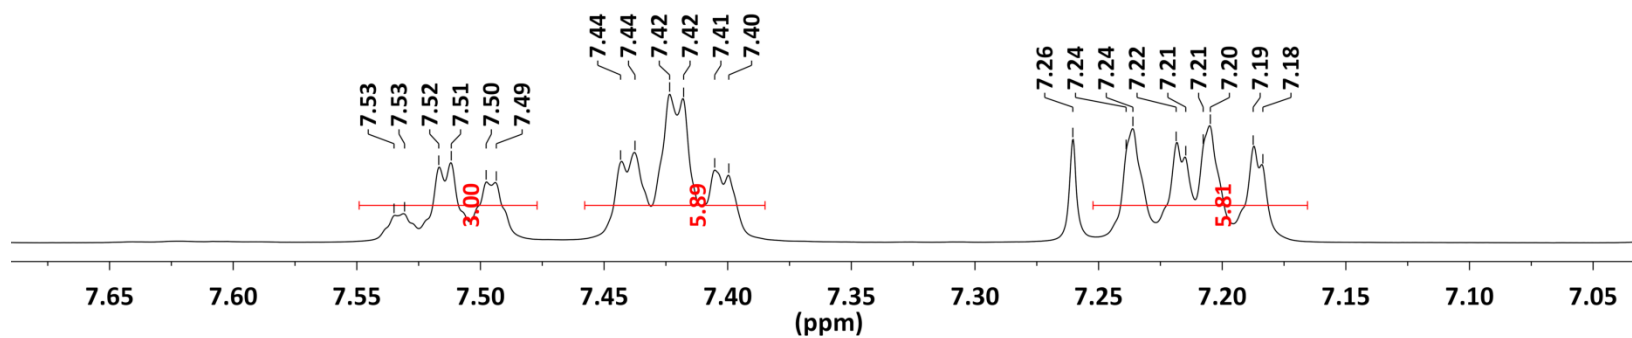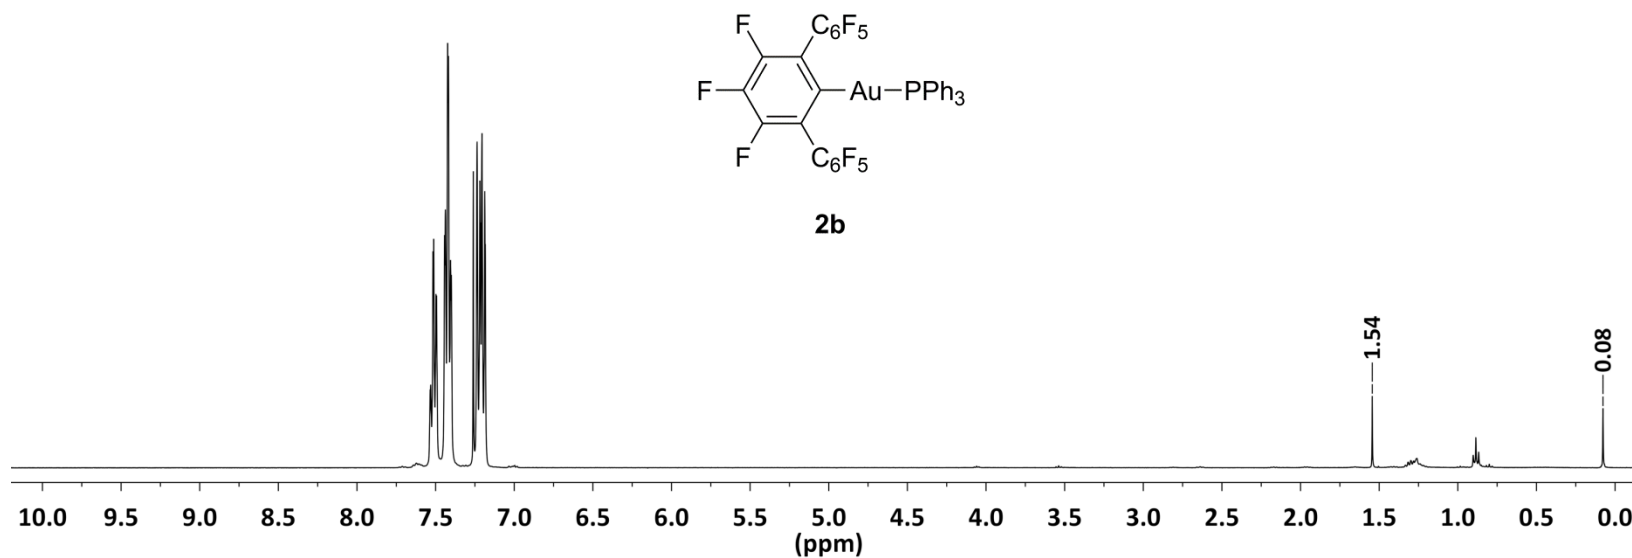

Figure S26.  $^1\text{H}$  NMR ( $\text{CDCl}_3$ , 400 MHz) spectrum of 2,6-( $\text{C}_6\text{F}_5$ ) $_2$ - $\text{C}_6\text{F}_3\text{Au}(\text{PPh}_3)$  (**2b**).

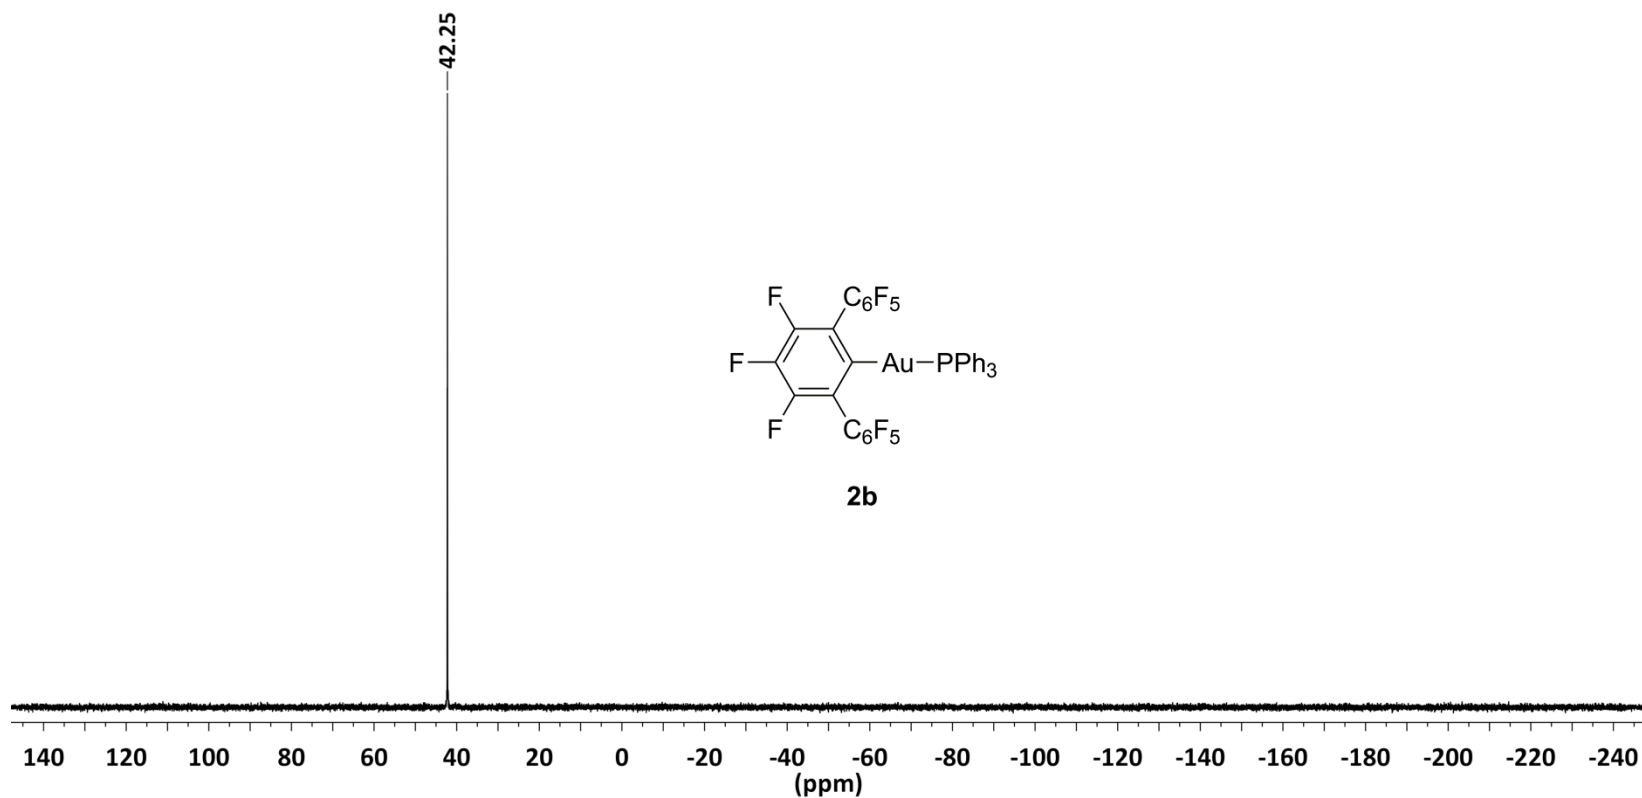

Figure S27.  $^{31}\text{P}\{^1\text{H}\}$  NMR ( $\text{CDCl}_3$ , 162 MHz) spectrum of 2,6-( $\text{C}_6\text{F}_5$ ) $_2$ - $\text{C}_6\text{F}_3\text{Au}(\text{PPh}_3)$  (**2b**).



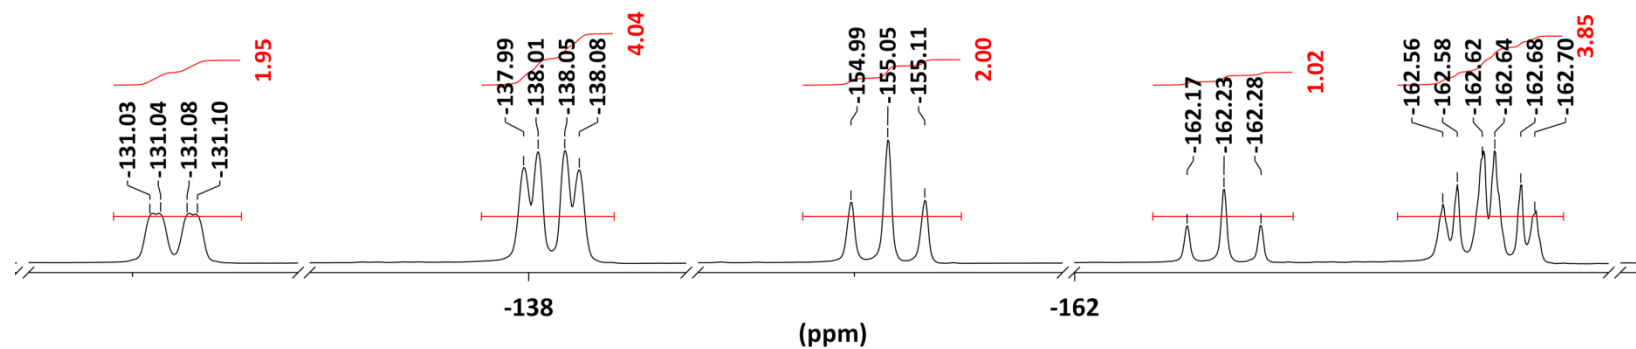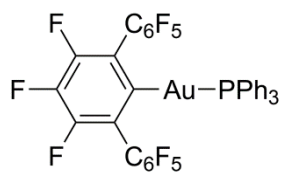

**2b**

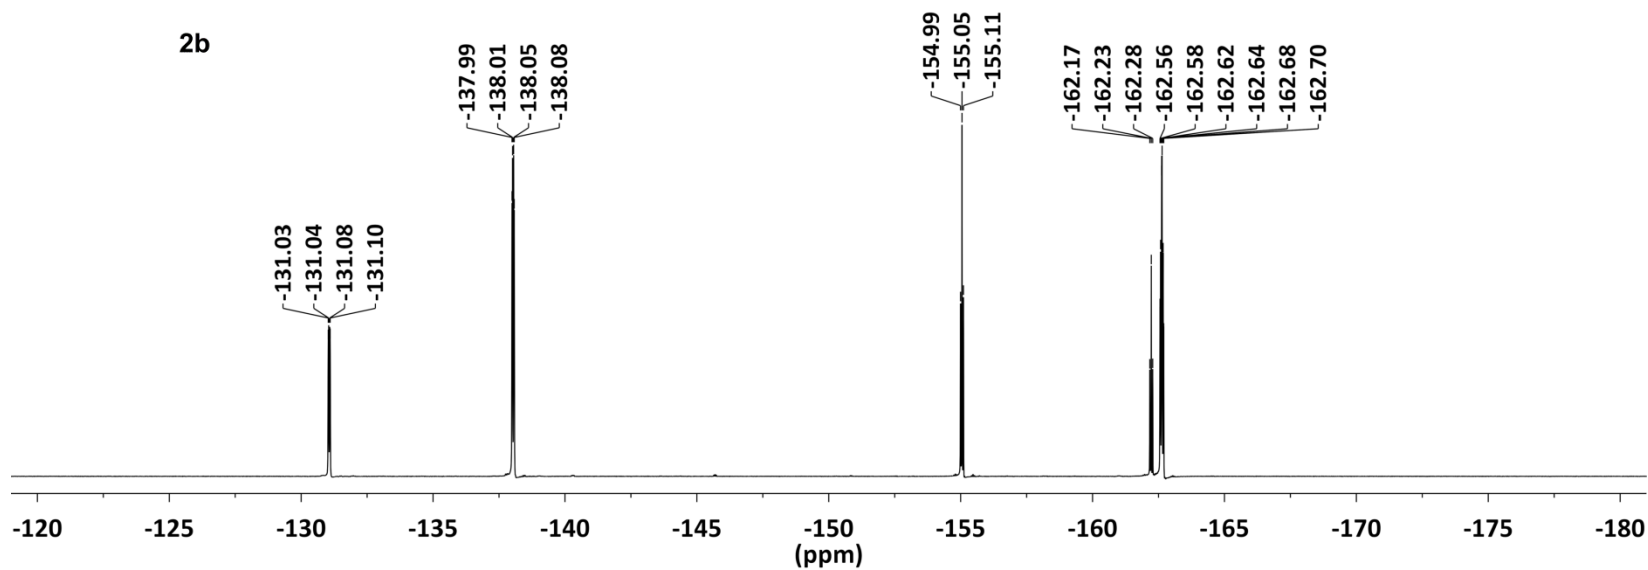

Figure S28.  $^{19}\text{F}\{^1\text{H}\}$  NMR ( $\text{CDCl}_3$ , 376 MHz) spectrum of 2,6-( $\text{C}_6\text{F}_5$ ) $_2$ - $\text{C}_6\text{F}_3\text{Au}(\text{PPh}_3)$  (**2b**).

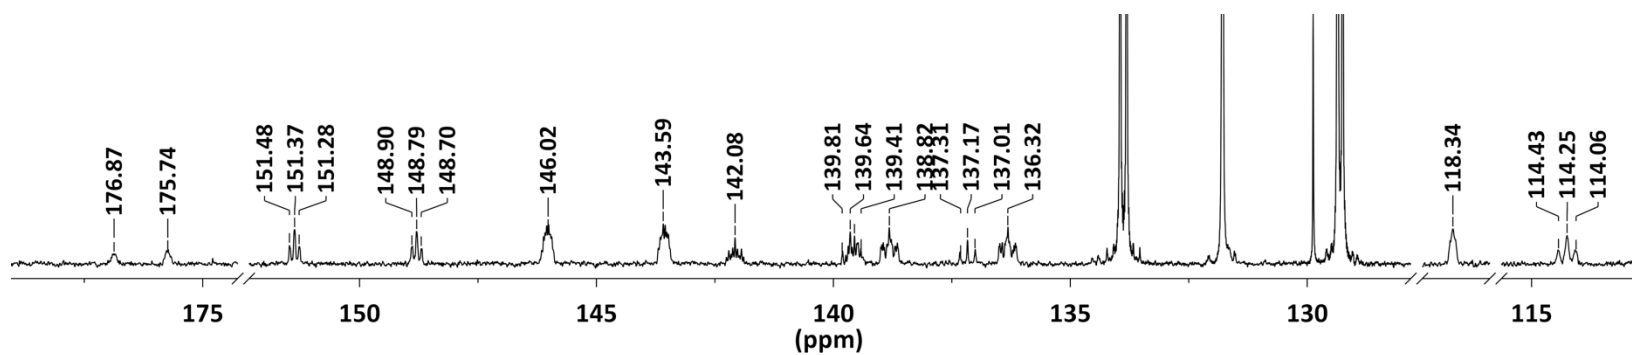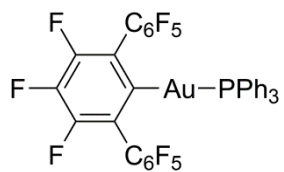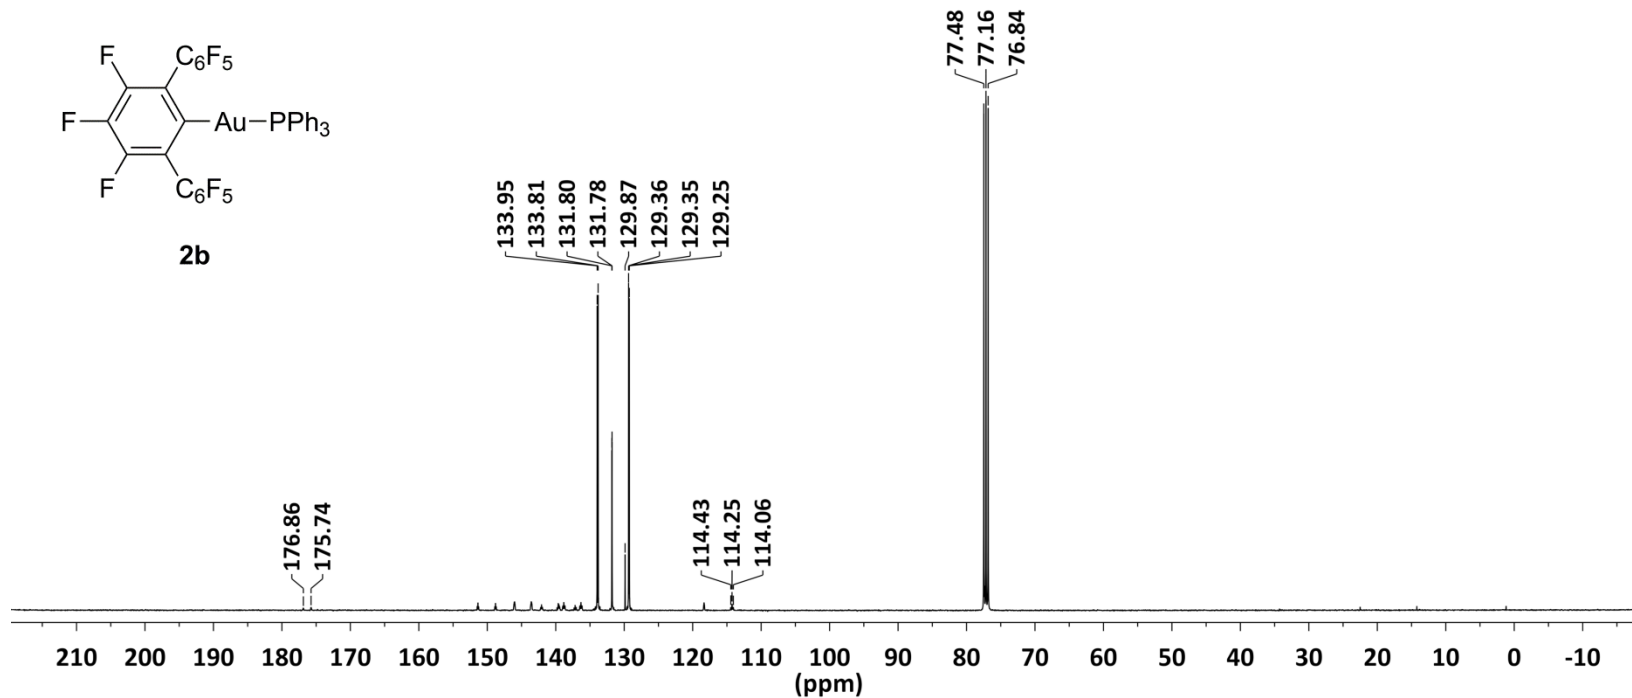

Figure S29.  $^{13}\text{C}\{^1\text{H}\}$  NMR ( $\text{CDCl}_3$ , 101 MHz) spectrum of 2,6-( $\text{C}_6\text{F}_5$ ) $_2$ - $\text{C}_6\text{F}_3\text{Au}(\text{PPh}_3)$  (**2b**).

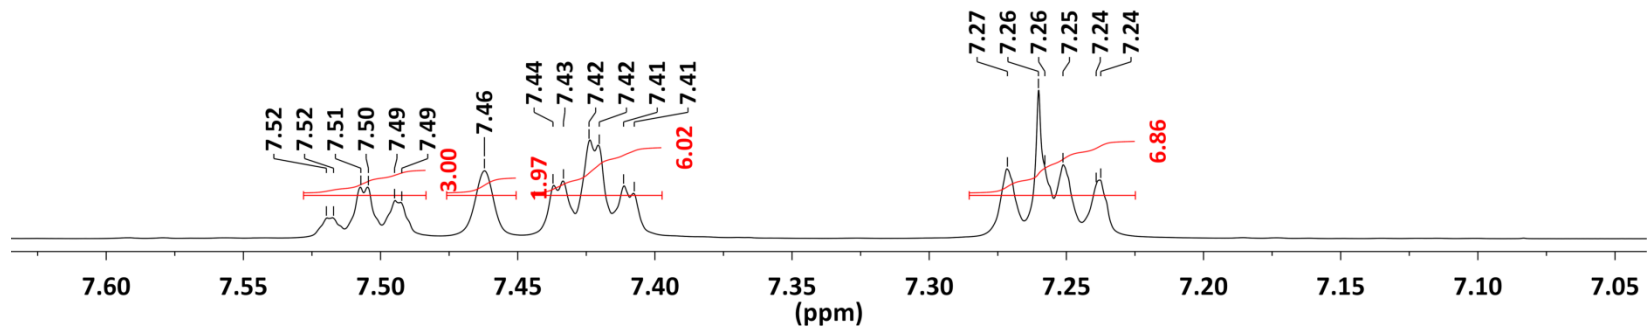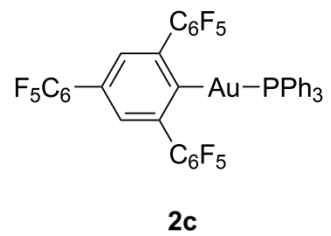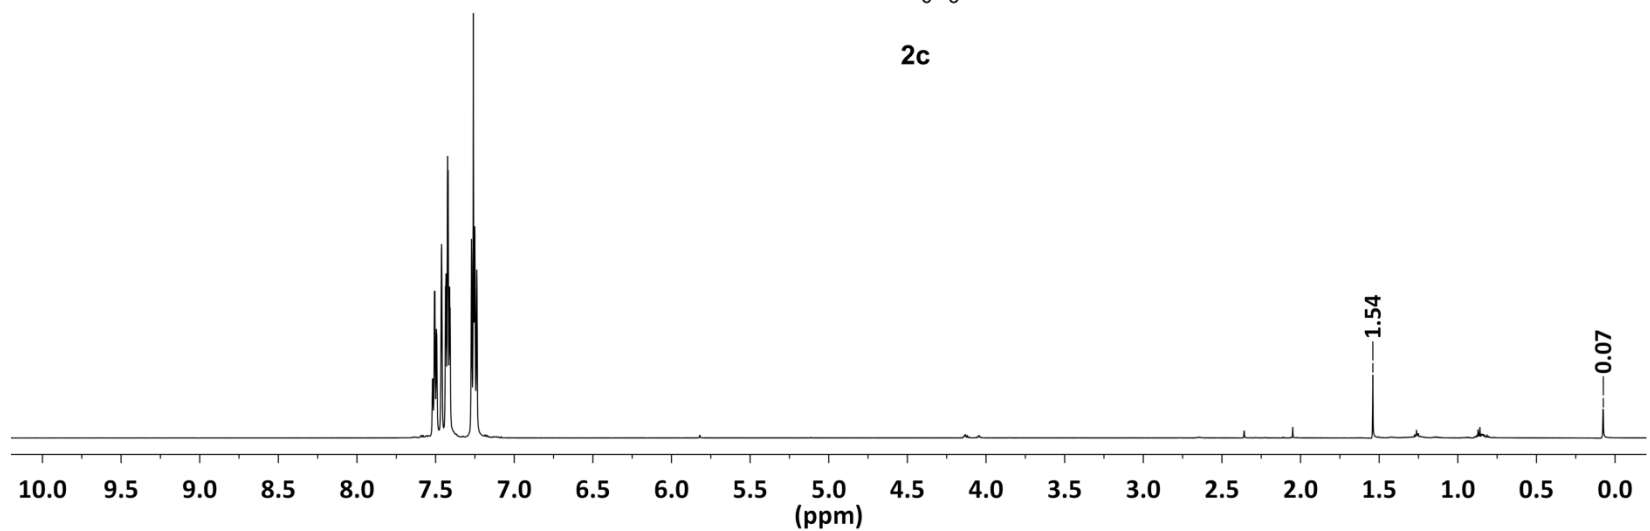

Figure S30.  $^1\text{H}$  NMR ( $\text{CDCl}_3$ , 600 MHz) spectrum of 2,4,6-( $\text{C}_6\text{F}_5$ ) $_3$ - $\text{C}_6\text{H}_2\text{Au}(\text{PPh}_3)$  (**2c**).

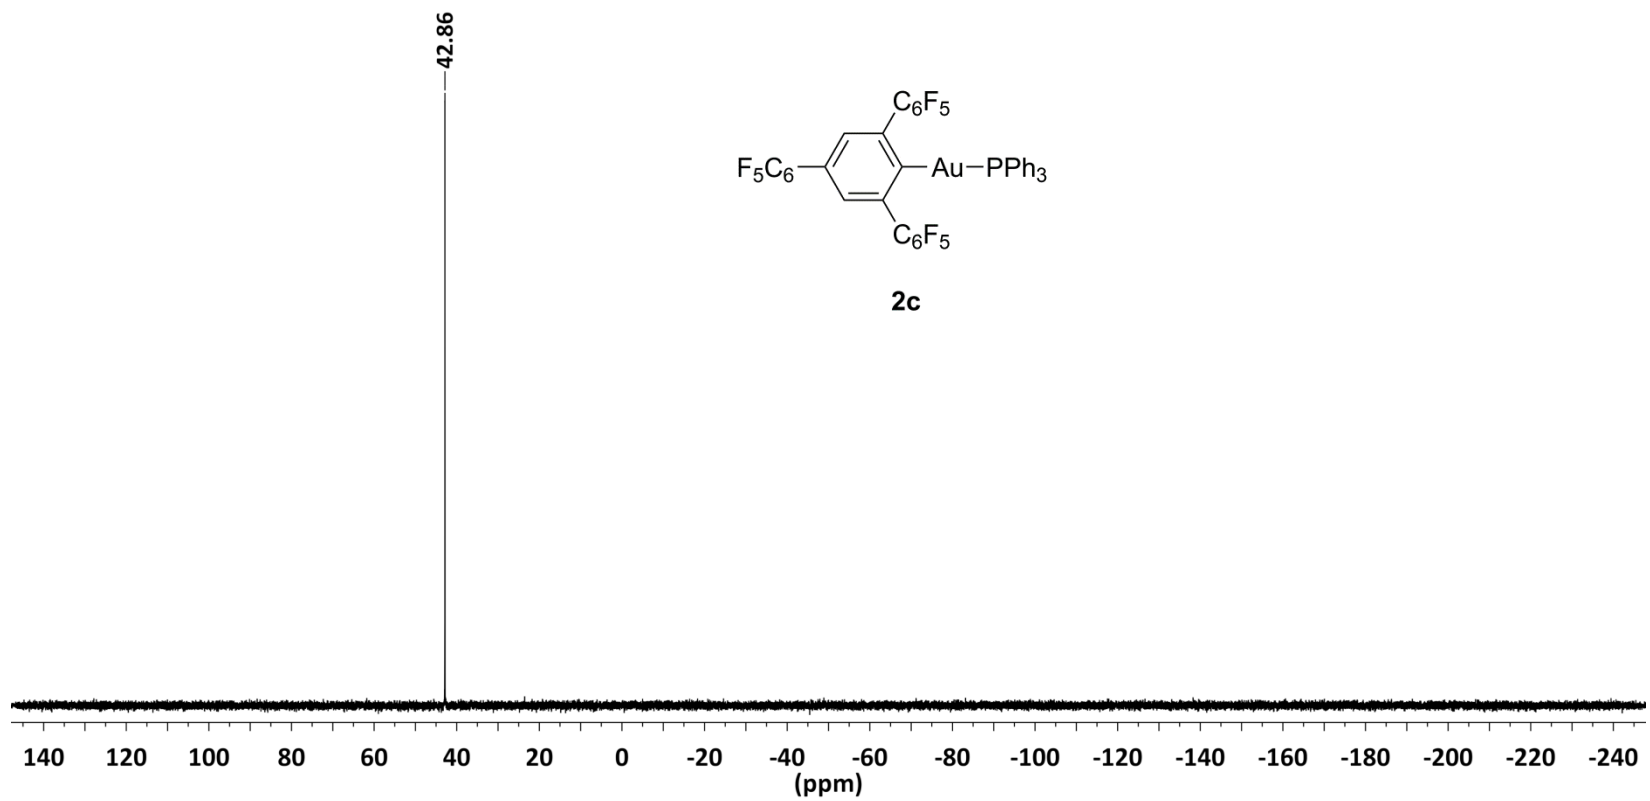

Figure S31.  $^{31}\text{P}\{^1\text{H}\}$  NMR ( $\text{CDCl}_3$ , 243 MHz) spectrum of 2,4,6-( $\text{C}_6\text{F}_5$ ) $_3$ - $\text{C}_6\text{H}_2\text{Au}(\text{PPh}_3)$  (**2c**).

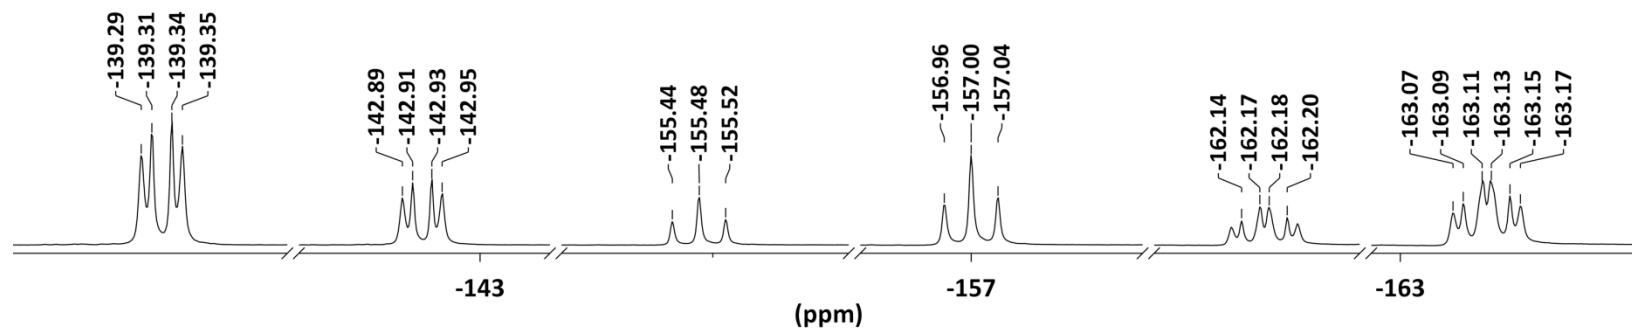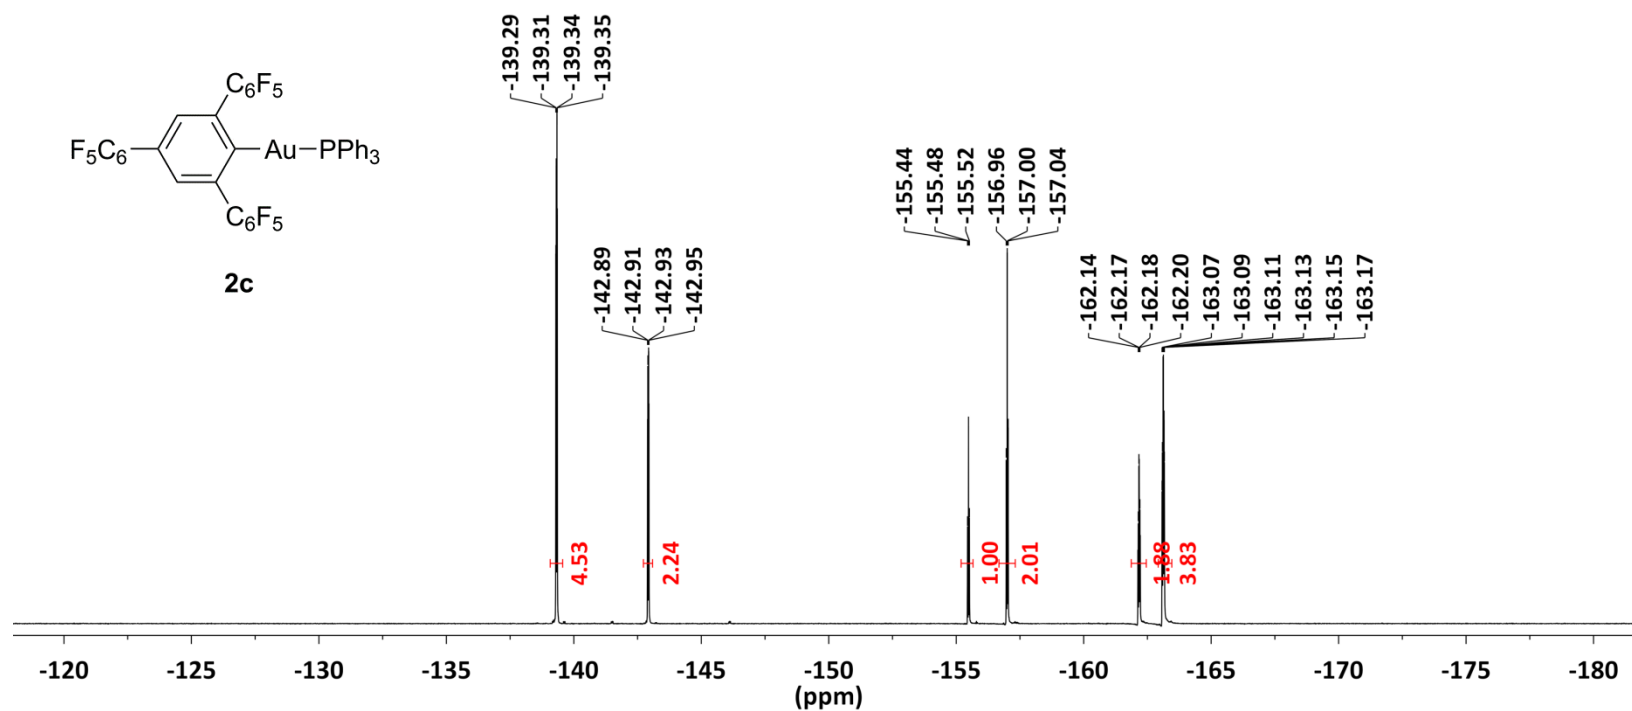

Figure S32.  $^{19}\text{F}\{^1\text{H}\}$  NMR ( $\text{CDCl}_3$ , 565 MHz) spectrum of 2,4,6-( $\text{C}_6\text{F}_5$ ) $_3$ - $\text{C}_6\text{H}_2\text{Au}(\text{PPh}_3)$  (**2c**).

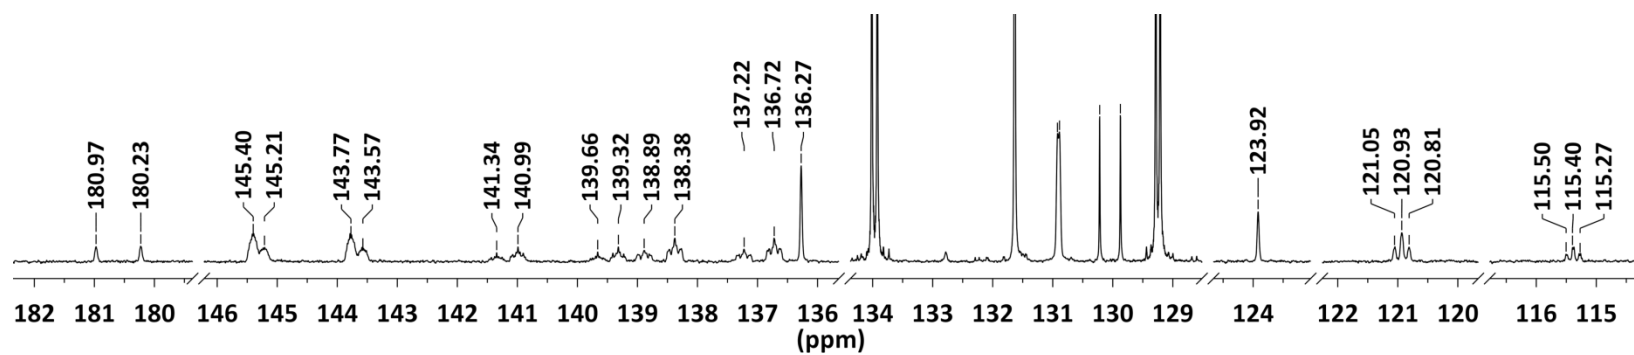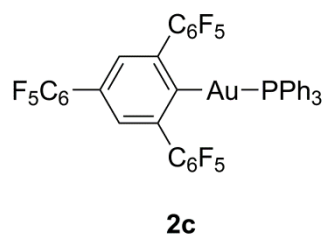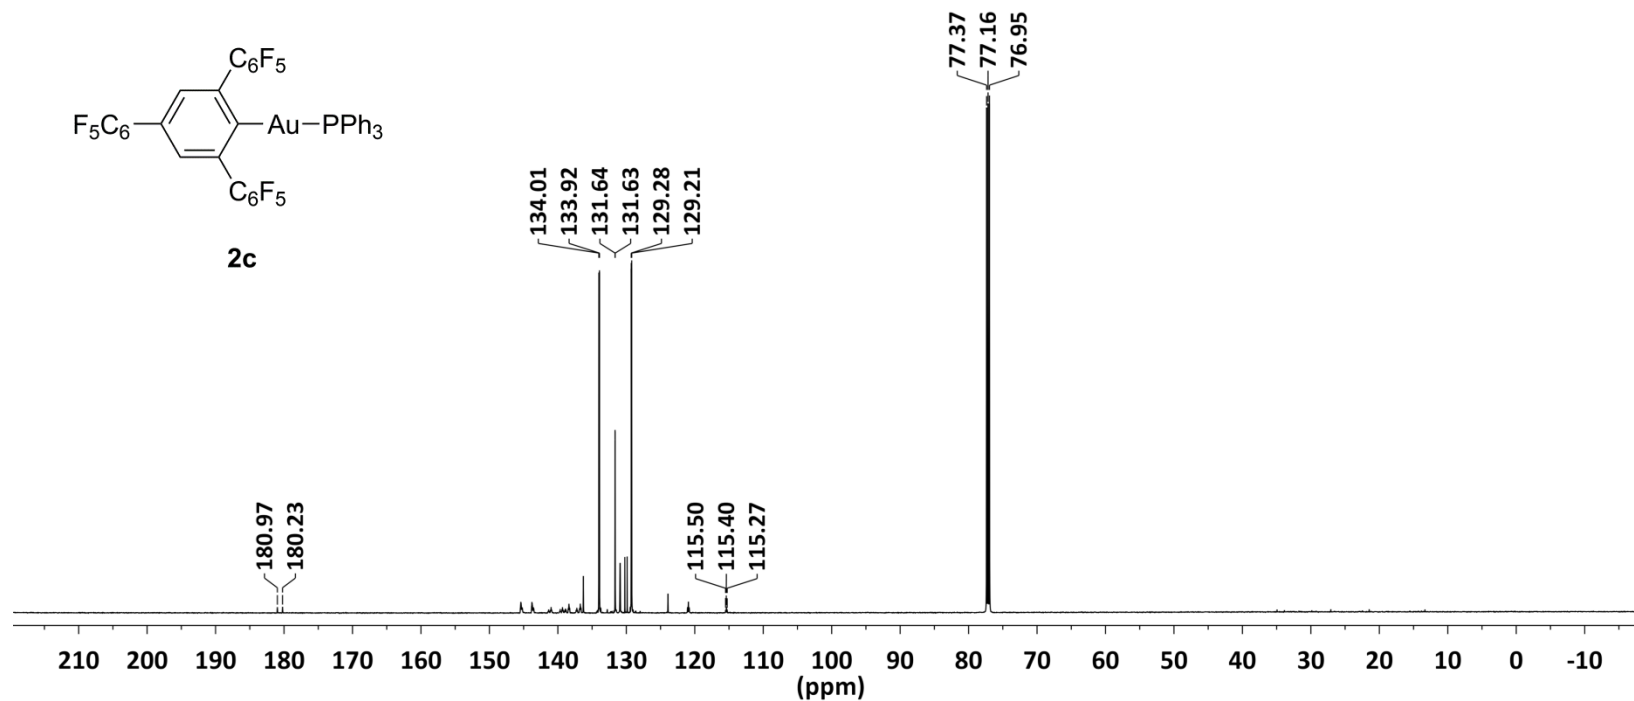

Figure S33.  $^{13}\text{C}\{^1\text{H}\}$  NMR ( $\text{CDCl}_3$ , 151 MHz) spectrum of 2,4,6- $(\text{C}_6\text{F}_5)_3\text{-C}_6\text{H}_2\text{Au}(\text{PPh}_3)$  (**2c**).

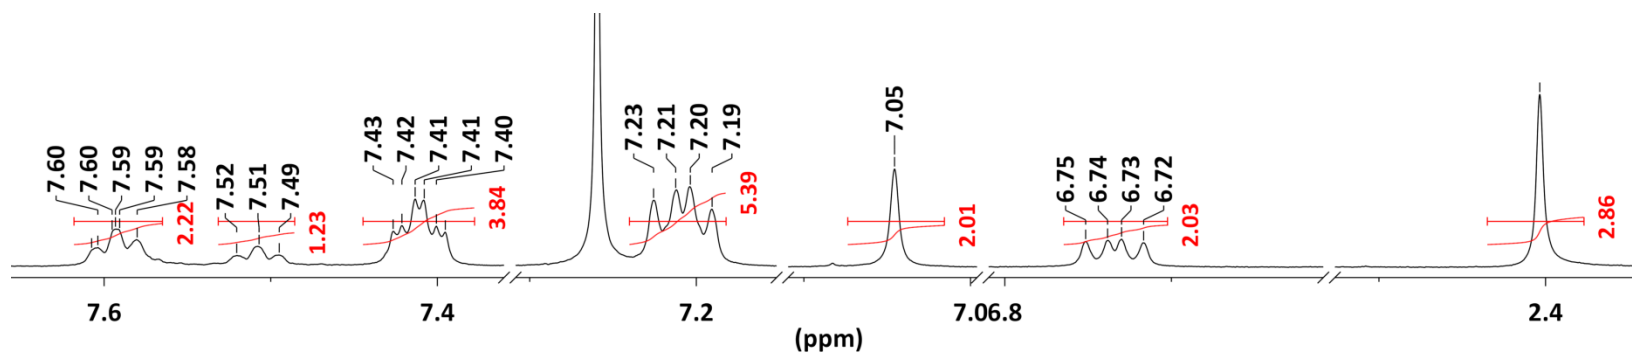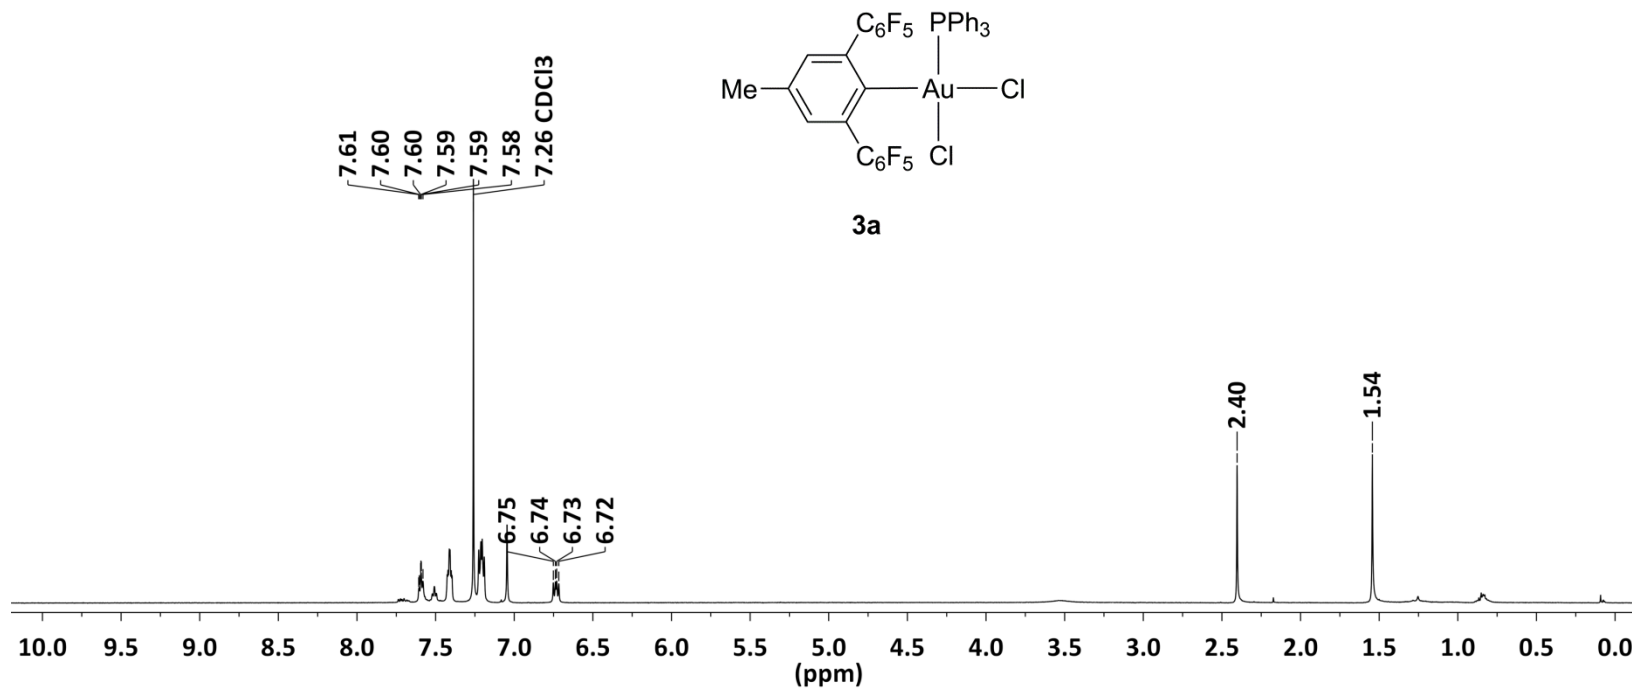

Figure S34.  $^1\text{H}$  NMR ( $\text{CDCl}_3$ , 600 MHz) spectrum of 2,6-( $\text{C}_6\text{F}_5$ ) $_2$ -4- $\text{CH}_3\text{C}_6\text{H}_2\text{AuCl}_2(\text{PPh}_3)$  (**3a**).

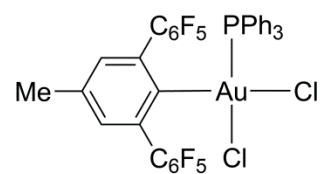

**3a**

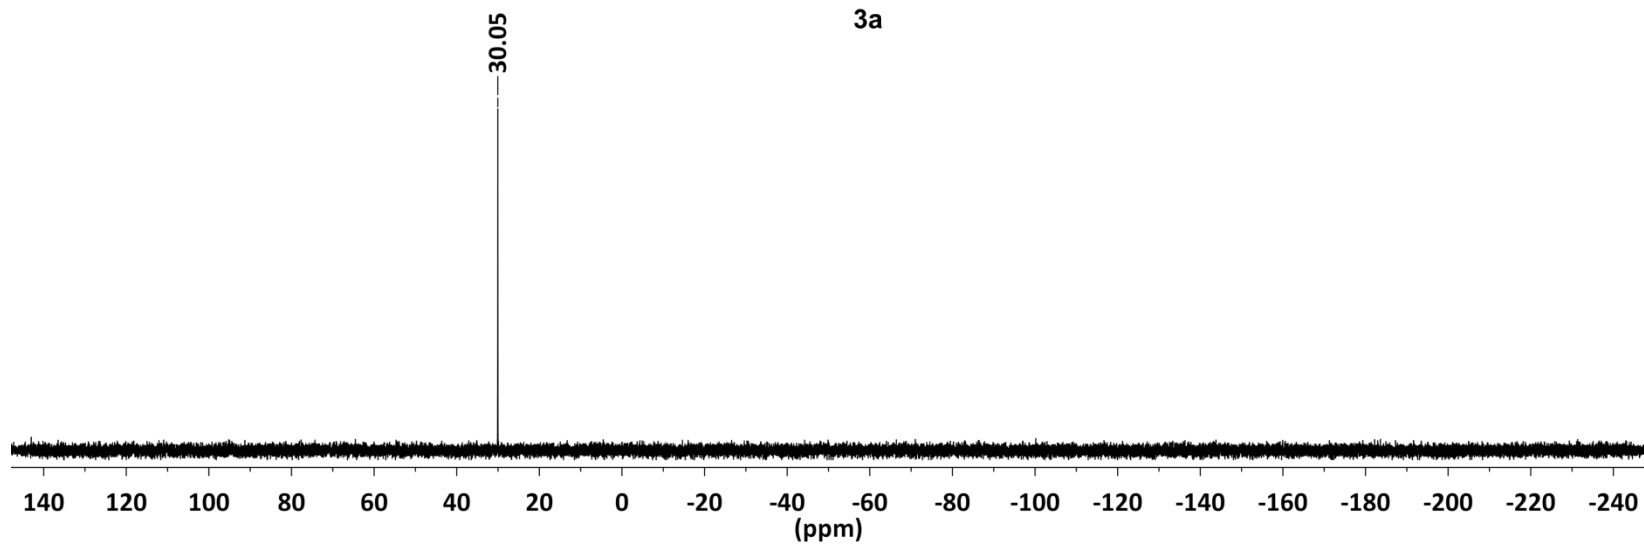

Figure S35.  $^{31}\text{P}\{^1\text{H}\}$  NMR ( $\text{CDCl}_3$ , 243 MHz) spectrum of 2,6-( $\text{C}_6\text{F}_5$ ) $_2$ -4- $\text{CH}_3\text{C}_6\text{H}_2\text{AuCl}_2(\text{PPh}_3)$  (**3a**).



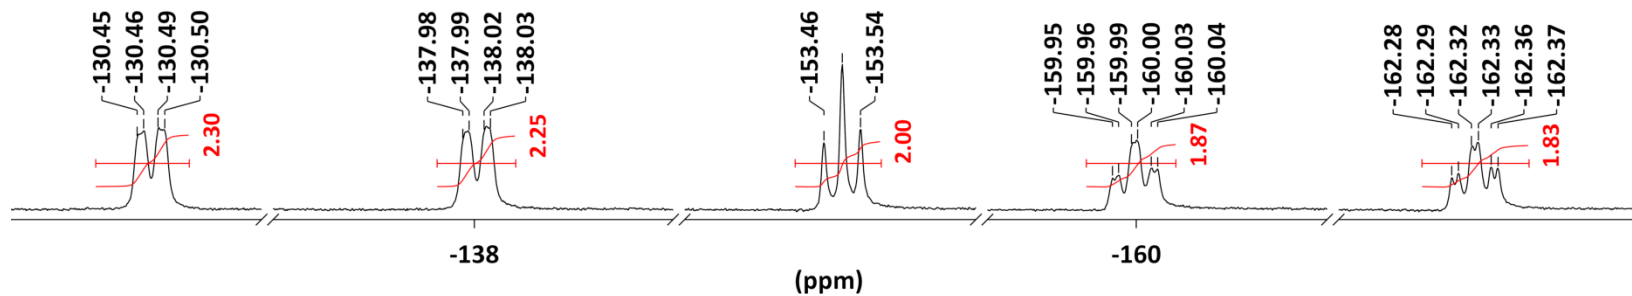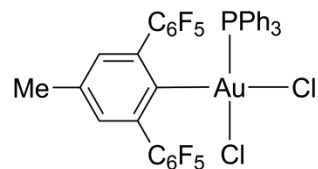

**3a**

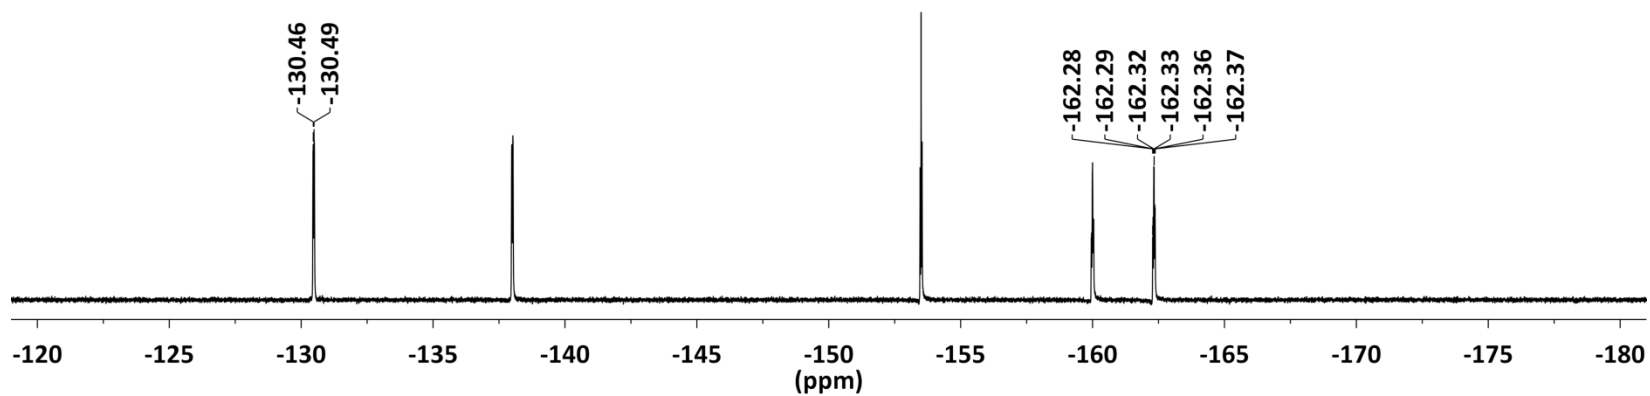

Figure S36.  $^{19}\text{F}\{^1\text{H}\}$  NMR ( $\text{CDCl}_3$ , 565 MHz) spectrum of 2,6-( $\text{C}_6\text{F}_5$ ) $_2$ -4- $\text{CH}_3\text{C}_6\text{H}_2\text{AuCl}_2(\text{PPh}_3)$  (**3a**).

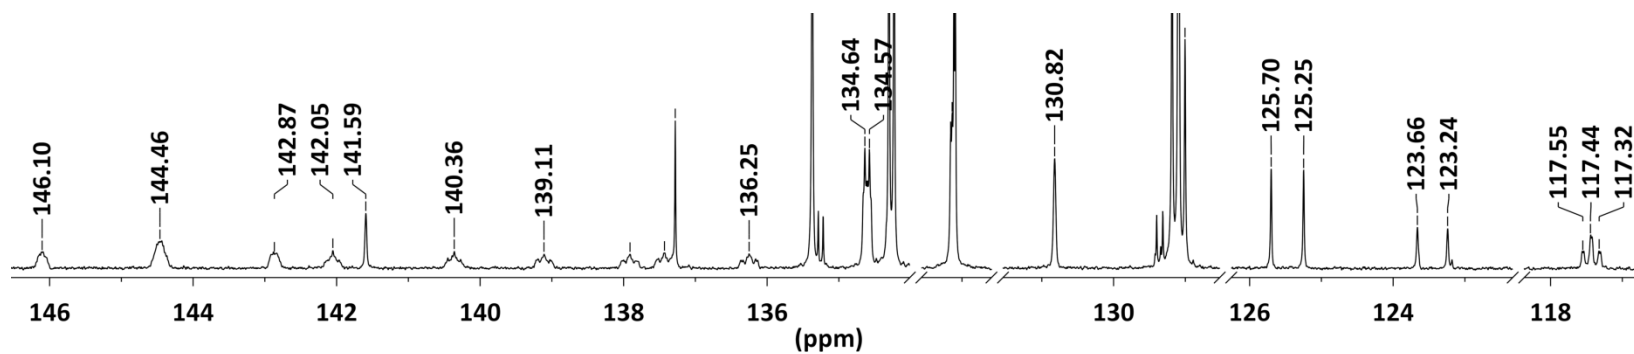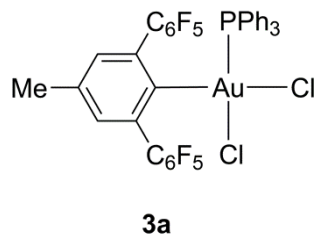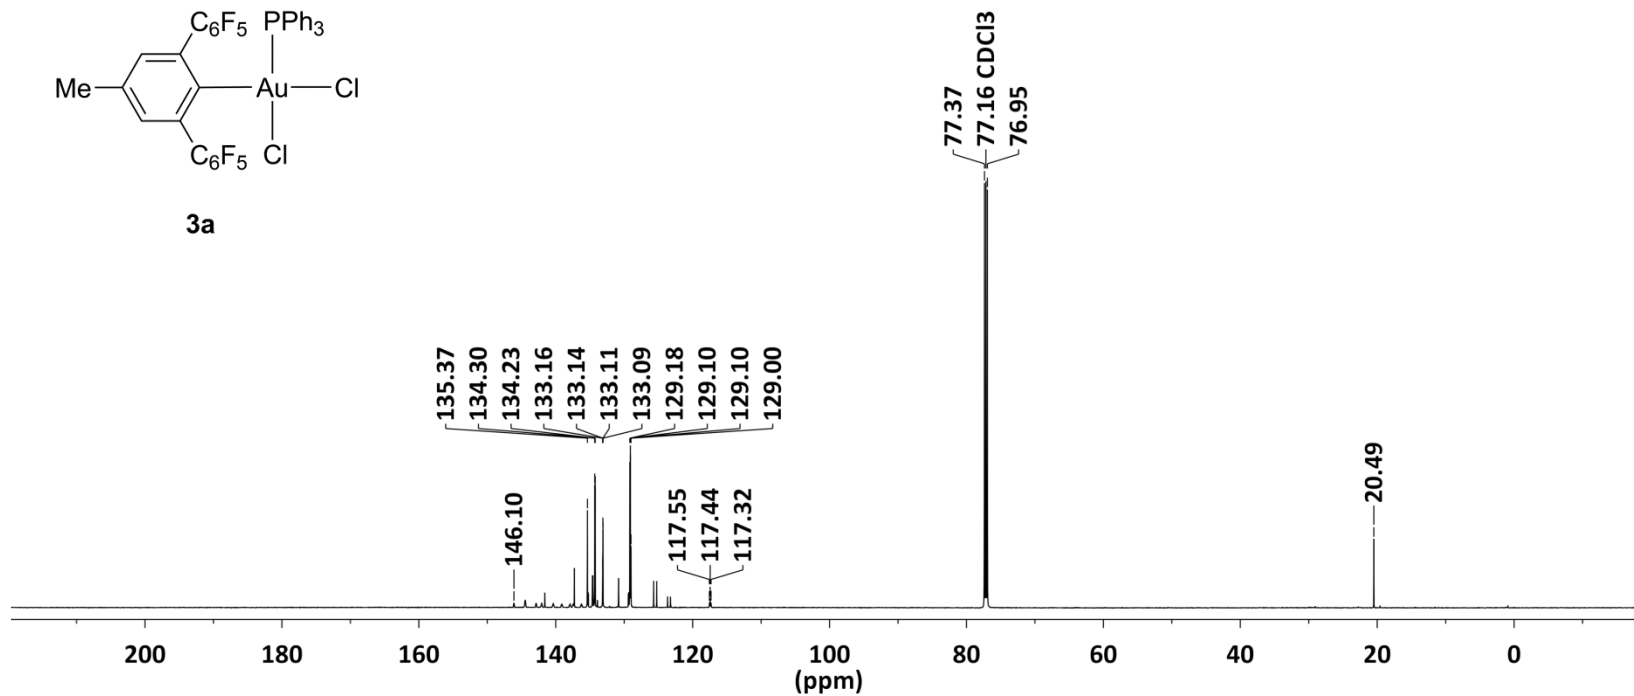

Figure S37.  $^{13}\text{C}\{^1\text{H}\}$  NMR ( $\text{CDCl}_3$ , 151 MHz) spectrum of 2,6-( $\text{C}_6\text{F}_5$ ) $_2$ -4- $\text{CH}_3\text{C}_6\text{H}_2\text{AuCl}_2(\text{PPh}_3)$  (**3a**).

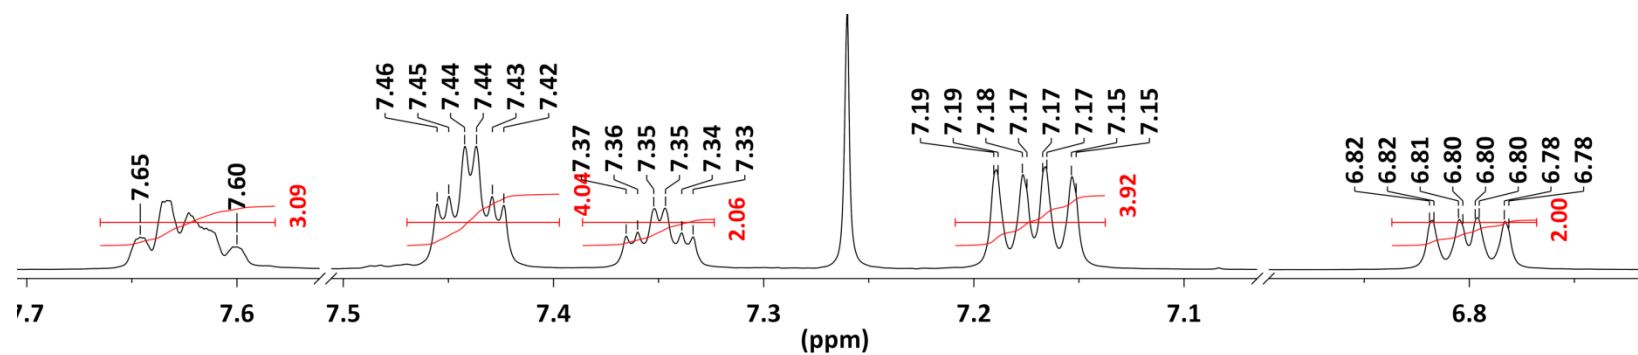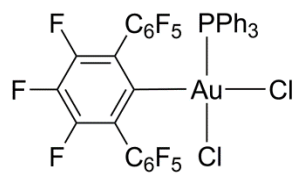

**3b**

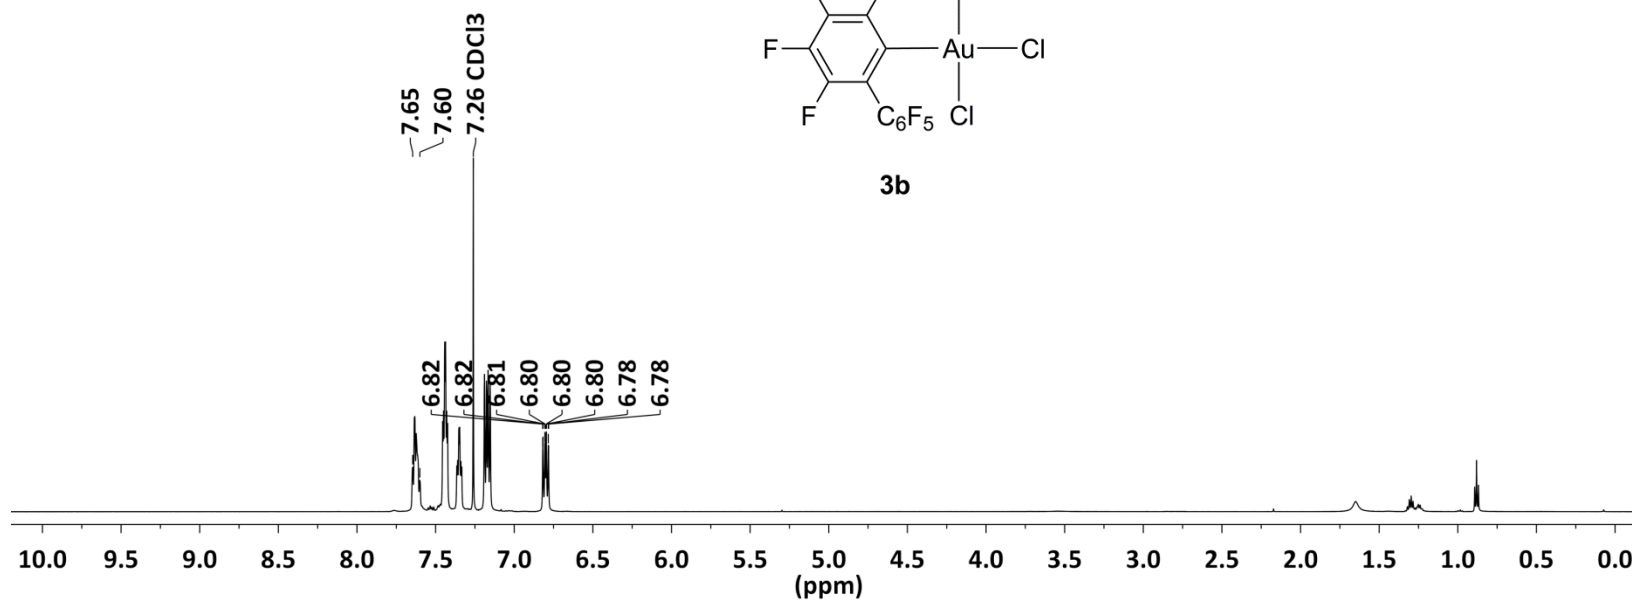

Figure S38. <sup>1</sup>H NMR (CDCl<sub>3</sub>, 600 MHz) spectrum of 2,6-(C<sub>6</sub>F<sub>5</sub>)<sub>2</sub>-C<sub>6</sub>F<sub>3</sub>AuCl<sub>2</sub>(PPh<sub>3</sub>) (**3b**).

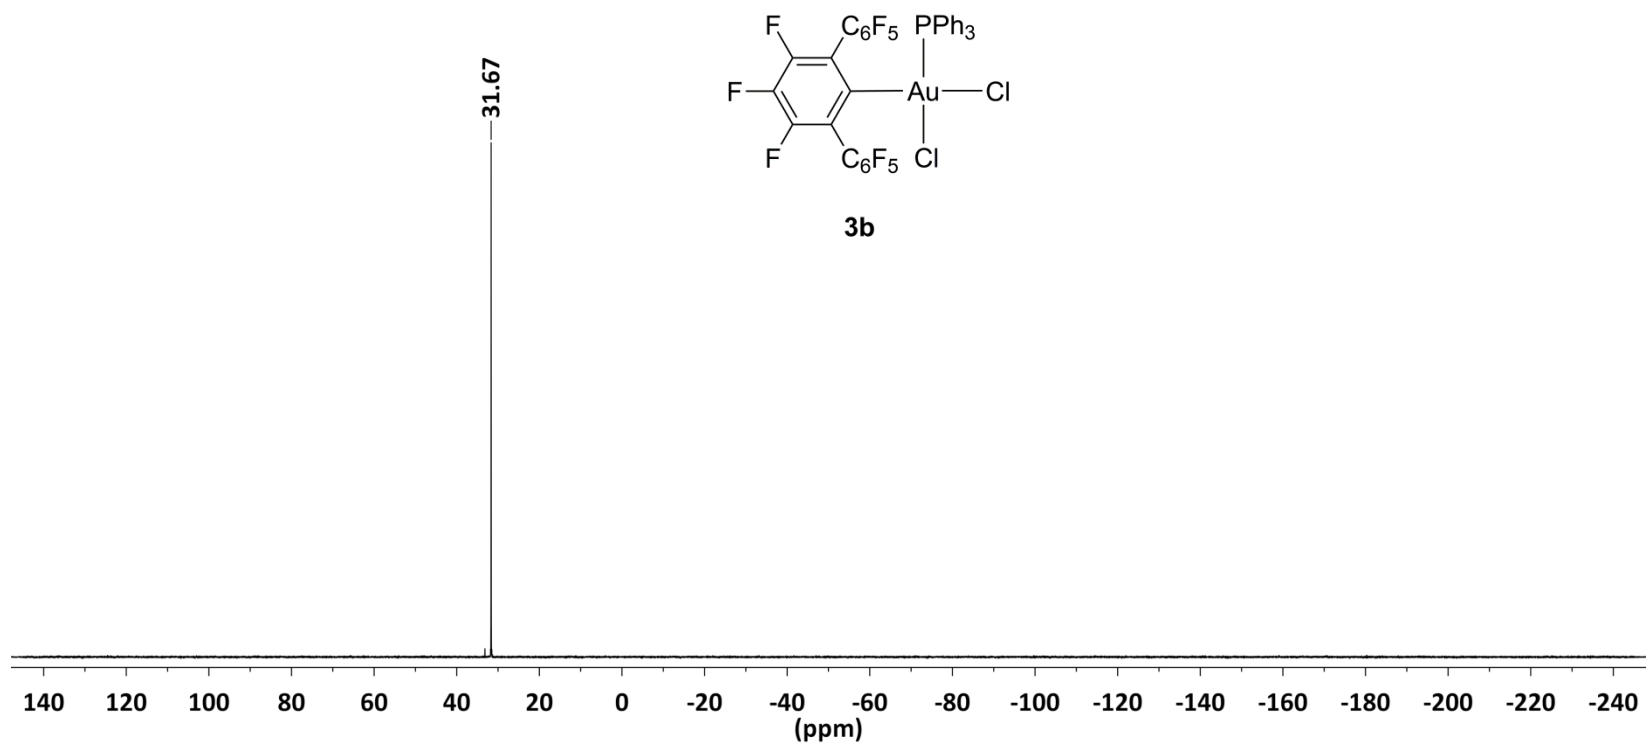

Figure S39.  $^{31}\text{P}\{^1\text{H}\}$  NMR ( $\text{CDCl}_3$ , 243 MHz) spectrum of 2,6-( $\text{C}_6\text{F}_5$ )<sub>2</sub>- $\text{C}_6\text{F}_3\text{AuCl}_2(\text{PPh}_3)$  (**3b**).

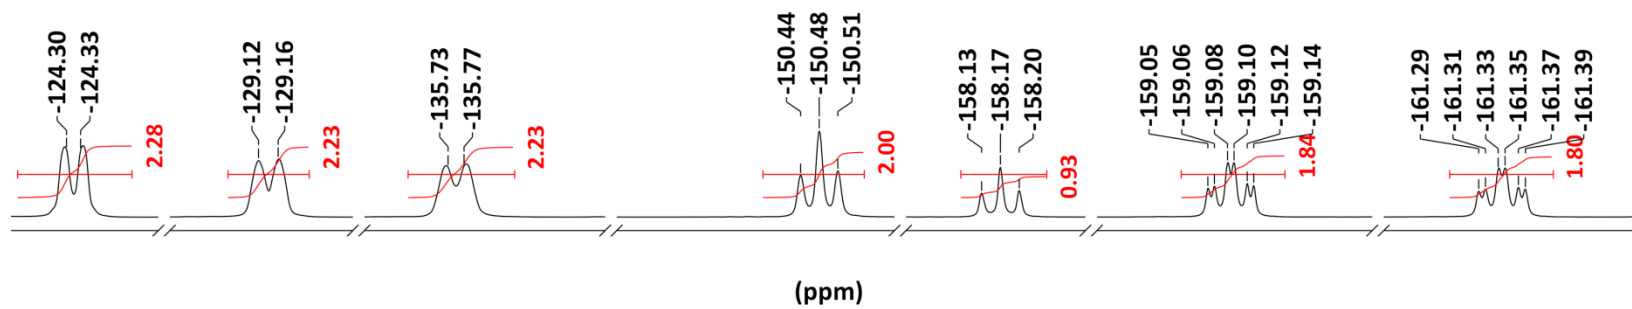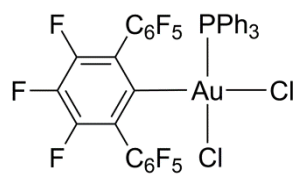

**3b**

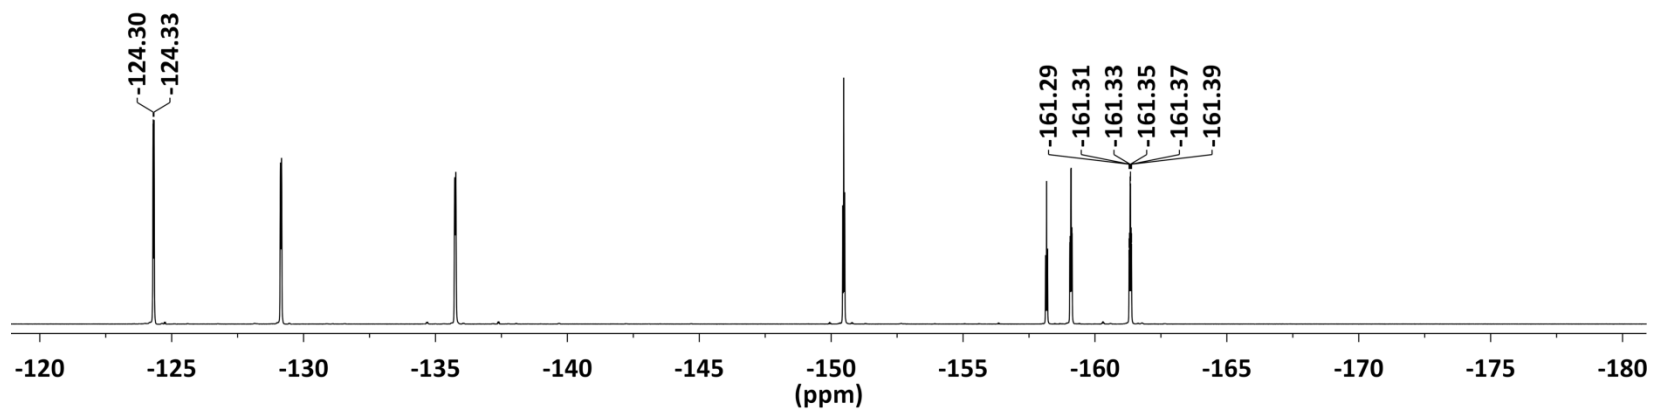

Figure S40. <sup>19</sup>F{<sup>1</sup>H} NMR (CDCl<sub>3</sub>, 565 MHz) spectrum of 2,6-(C<sub>6</sub>F<sub>5</sub>)<sub>2</sub>-C<sub>6</sub>F<sub>3</sub>AuCl<sub>2</sub>(PPh<sub>3</sub>) (**3b**).

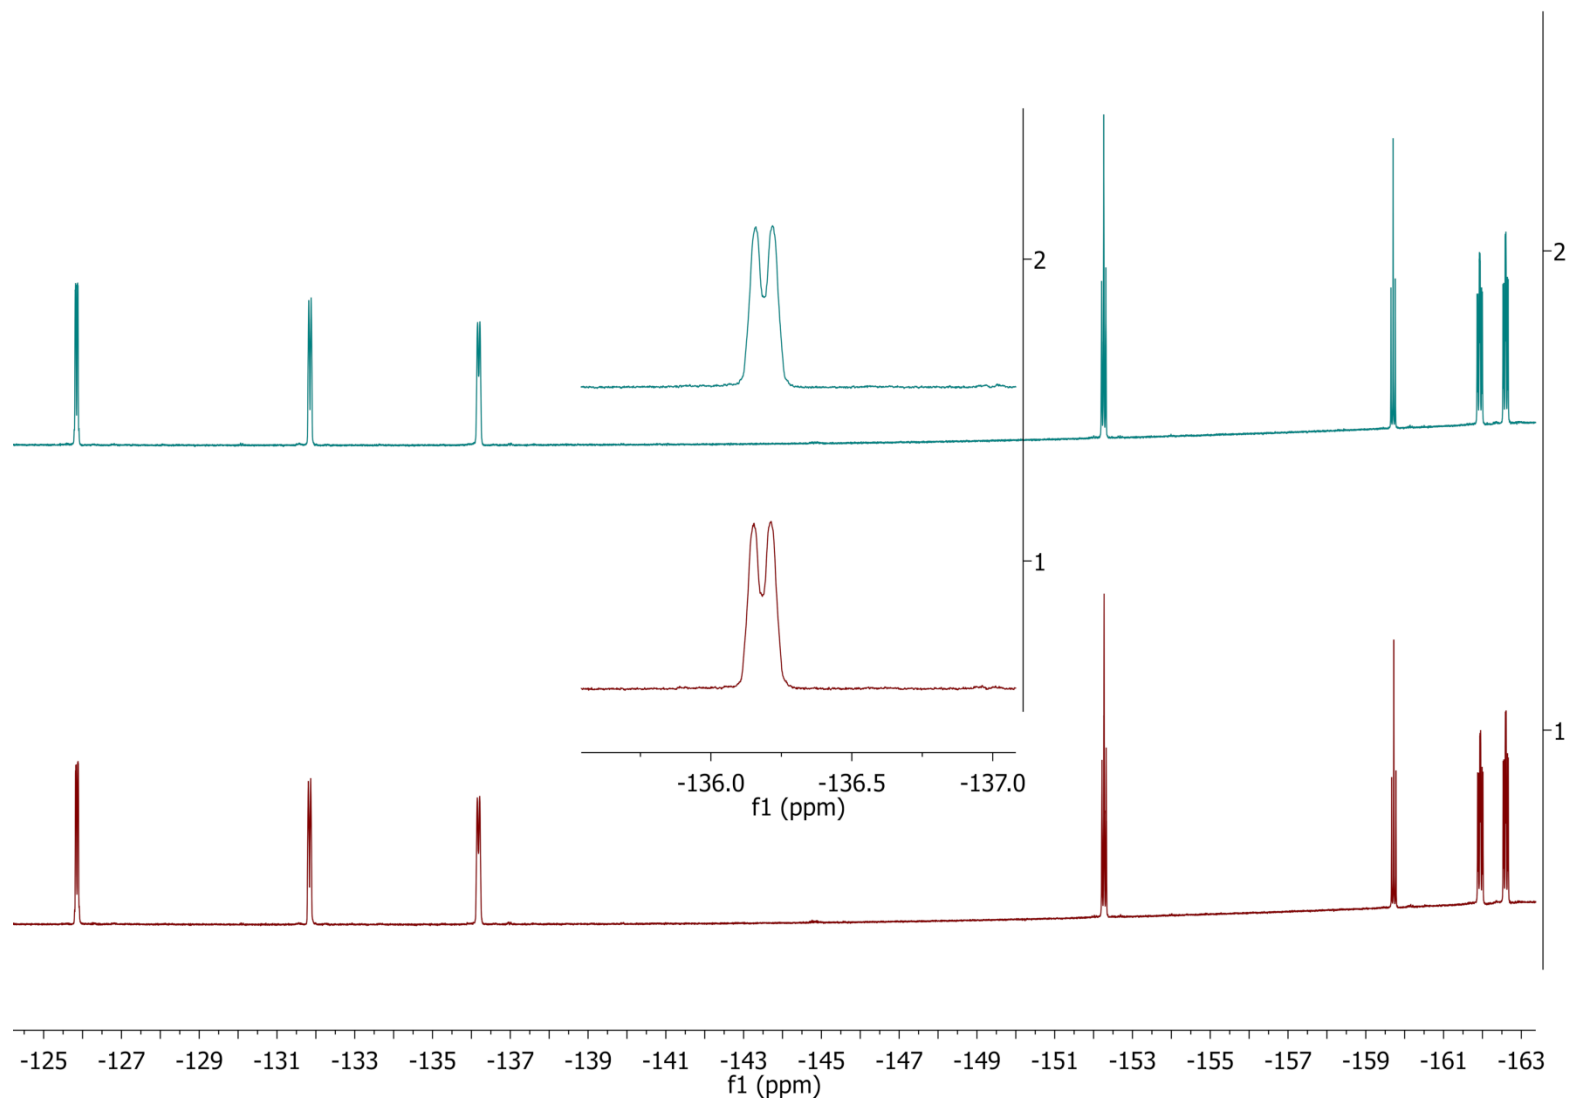

**Figure S41.**  $^{19}\text{F}\{^1\text{H}\}$  NMR (below) and  $^{19}\text{F}$  NMR (above) ( $\text{CD}_3\text{CN}$ , 376 MHz) spectrum of 2,6-( $\text{C}_6\text{F}_5$ ) $_2$ - $\text{C}_6\text{F}_3\text{AuCl}_2(\text{PPh}_3)$  (**3b**).

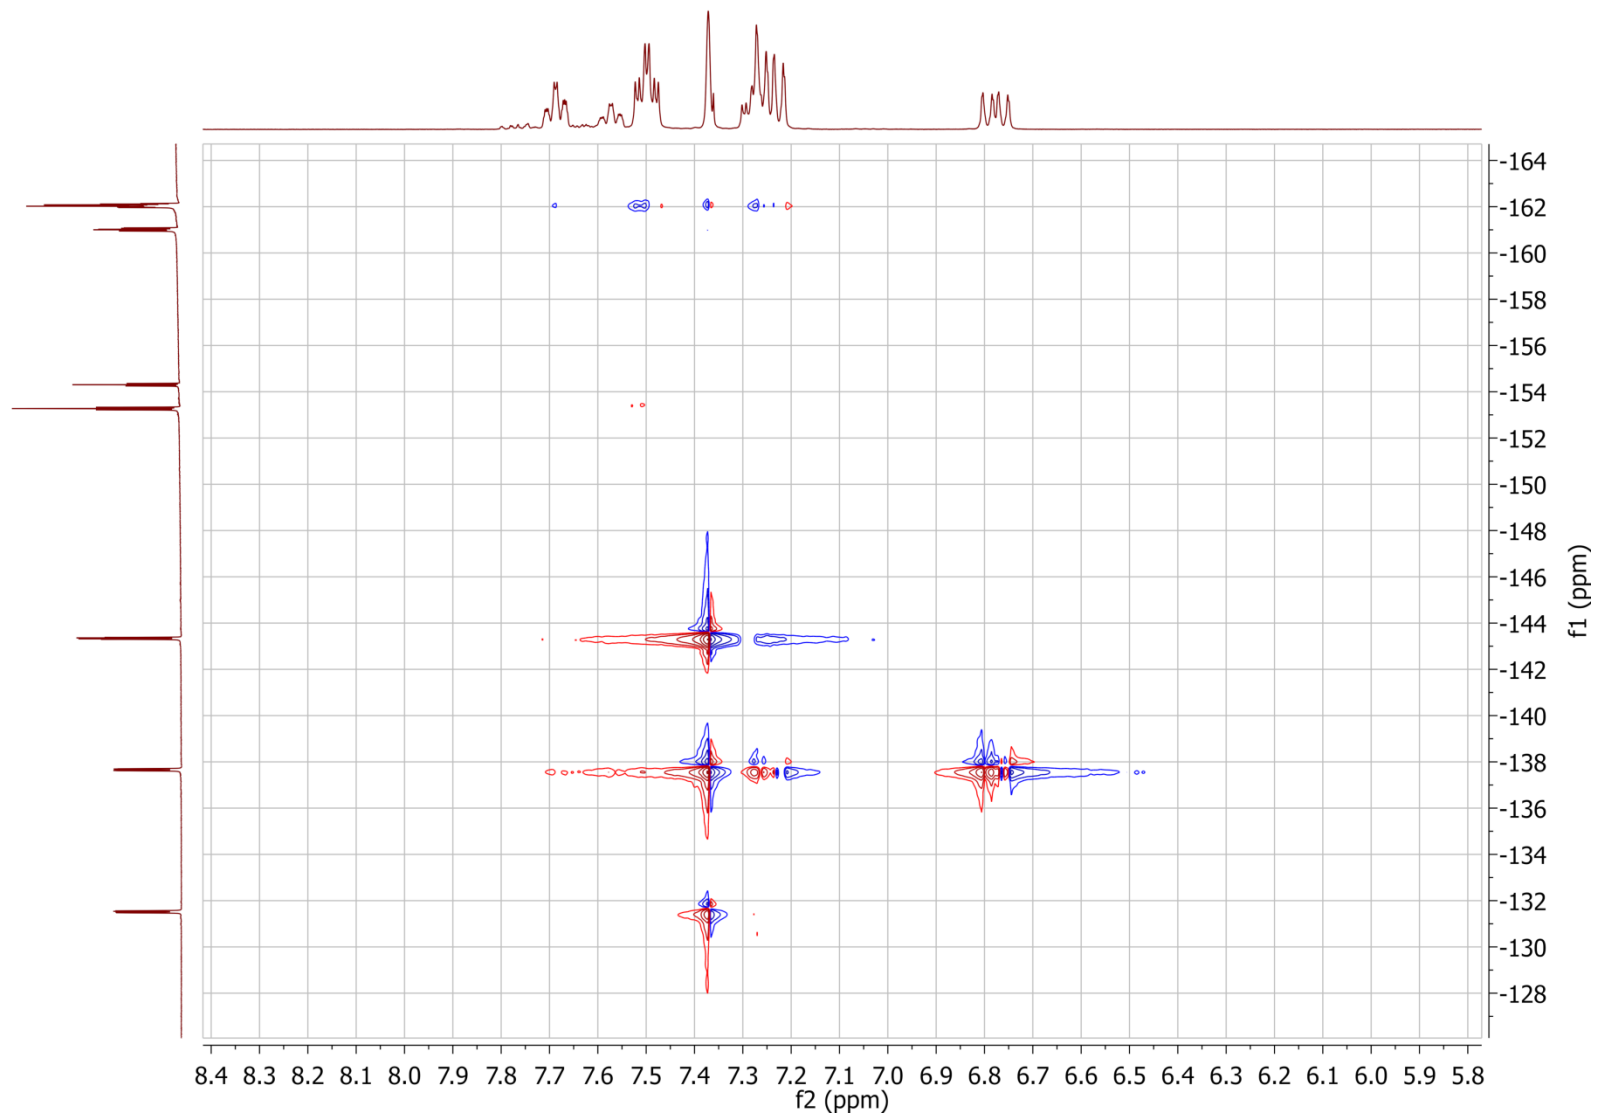

**Figure S42.**  $^1\text{H}$  -  $^{19}\text{F}$  HOESY ( $\text{CDCl}_3$ , 400 MHz and 376 MHz) spectrum of 2,6-( $\text{C}_6\text{F}_5$ ) $_2$ - $\text{C}_6\text{F}_3\text{AuCl}_2(\text{PPh}_3)$  (**3b**).

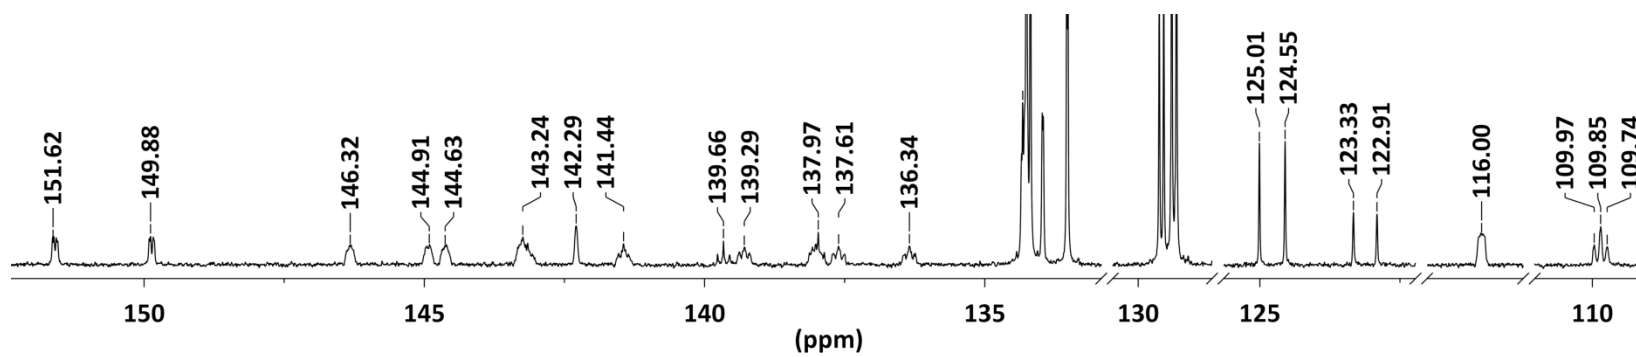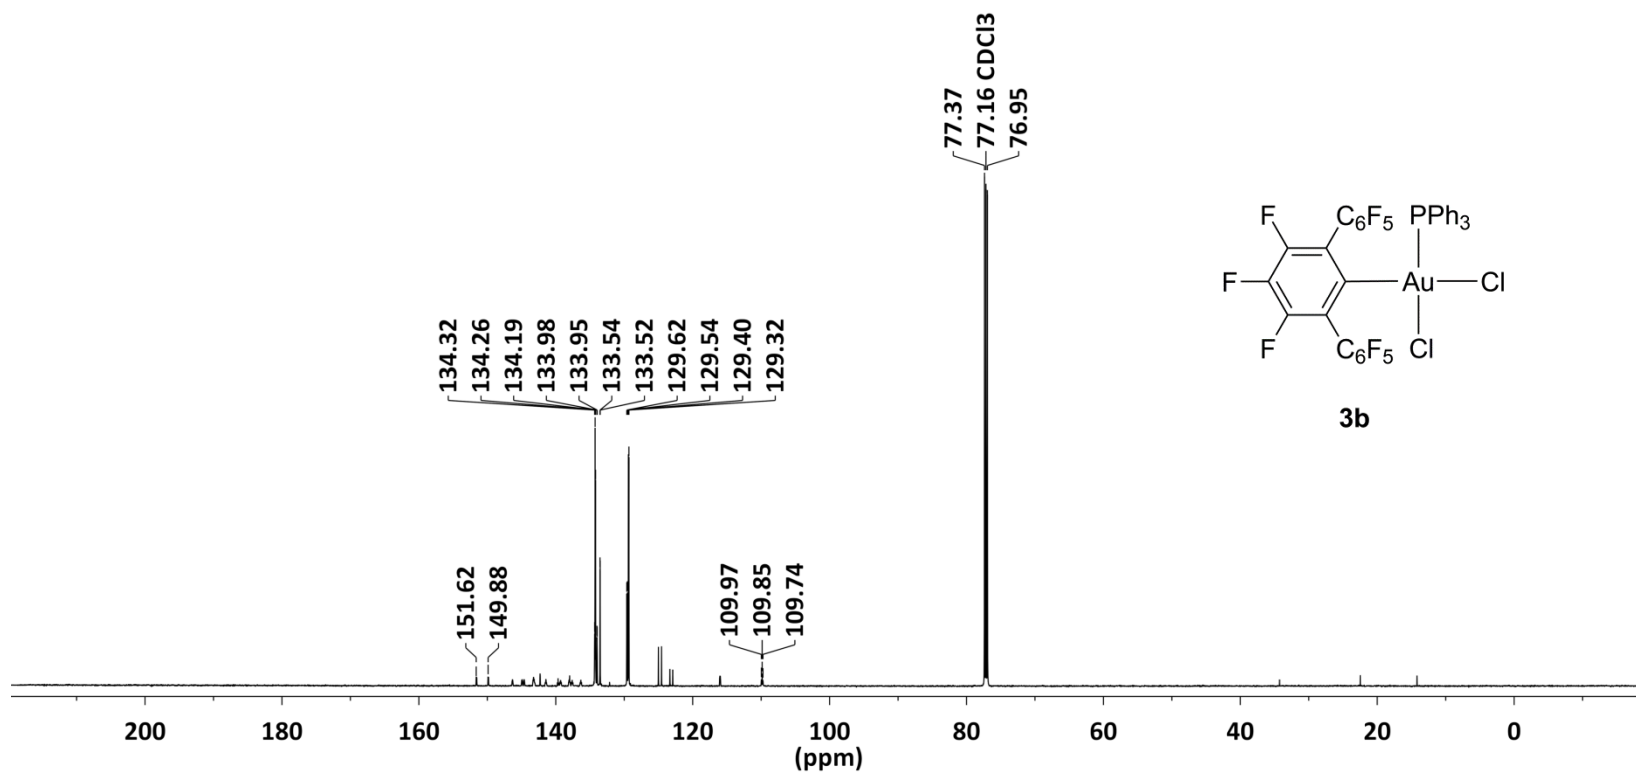

Figure S43.  $^{13}\text{C}\{^1\text{H}\}$  NMR ( $\text{CDCl}_3$ , 151 MHz) spectrum of 2,6-( $\text{C}_6\text{F}_5$ ) $_2$ - $\text{C}_6\text{F}_3\text{AuCl}_2(\text{PPh}_3)$  (**3b**).



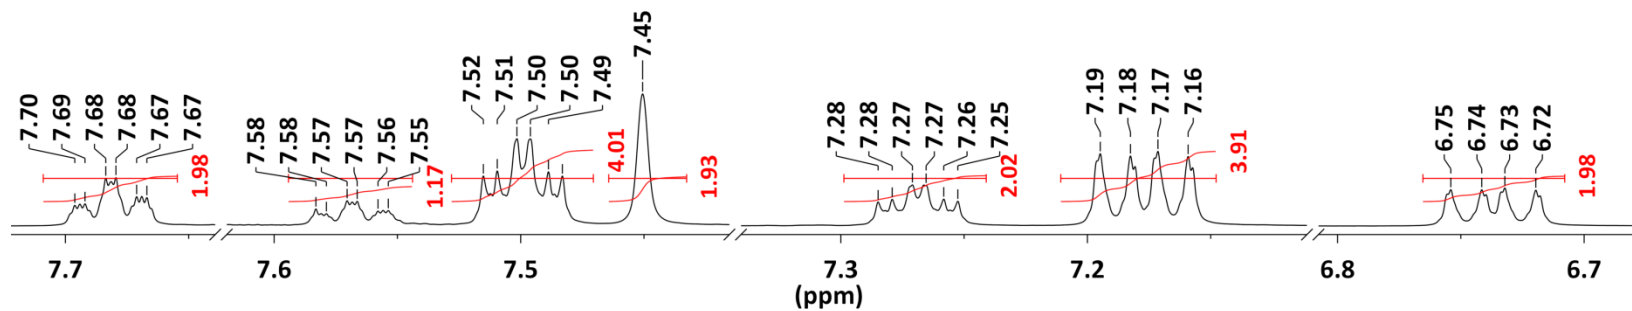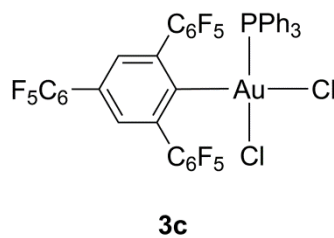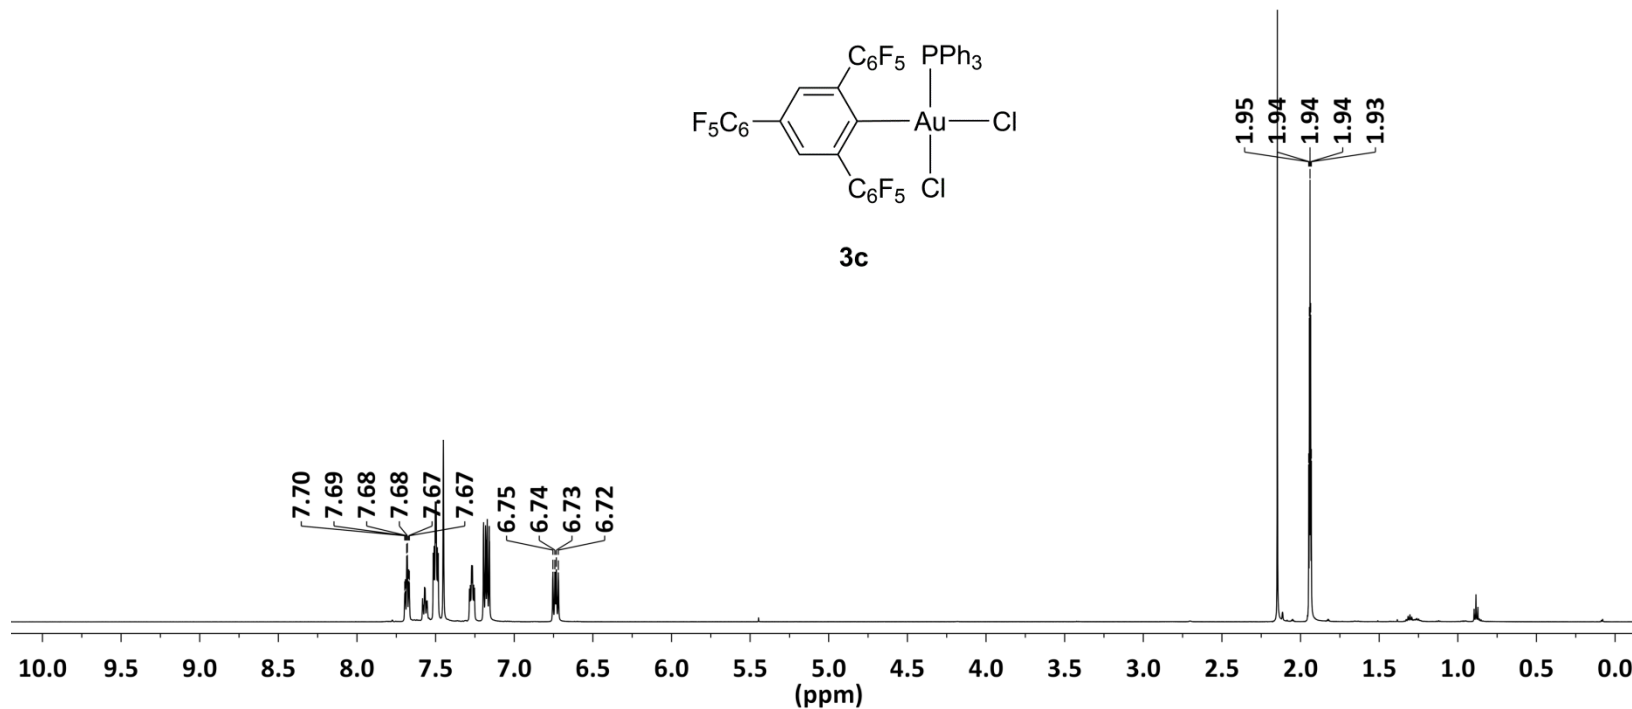

Figure S44.  $^1\text{H}$  NMR ( $\text{CD}_3\text{CN}$ , 600 MHz) spectrum of 2,4,6- $(\text{C}_6\text{F}_5)_3\text{-C}_6\text{H}_2\text{AuCl}_2(\text{PPh}_3)$  (**3c**).

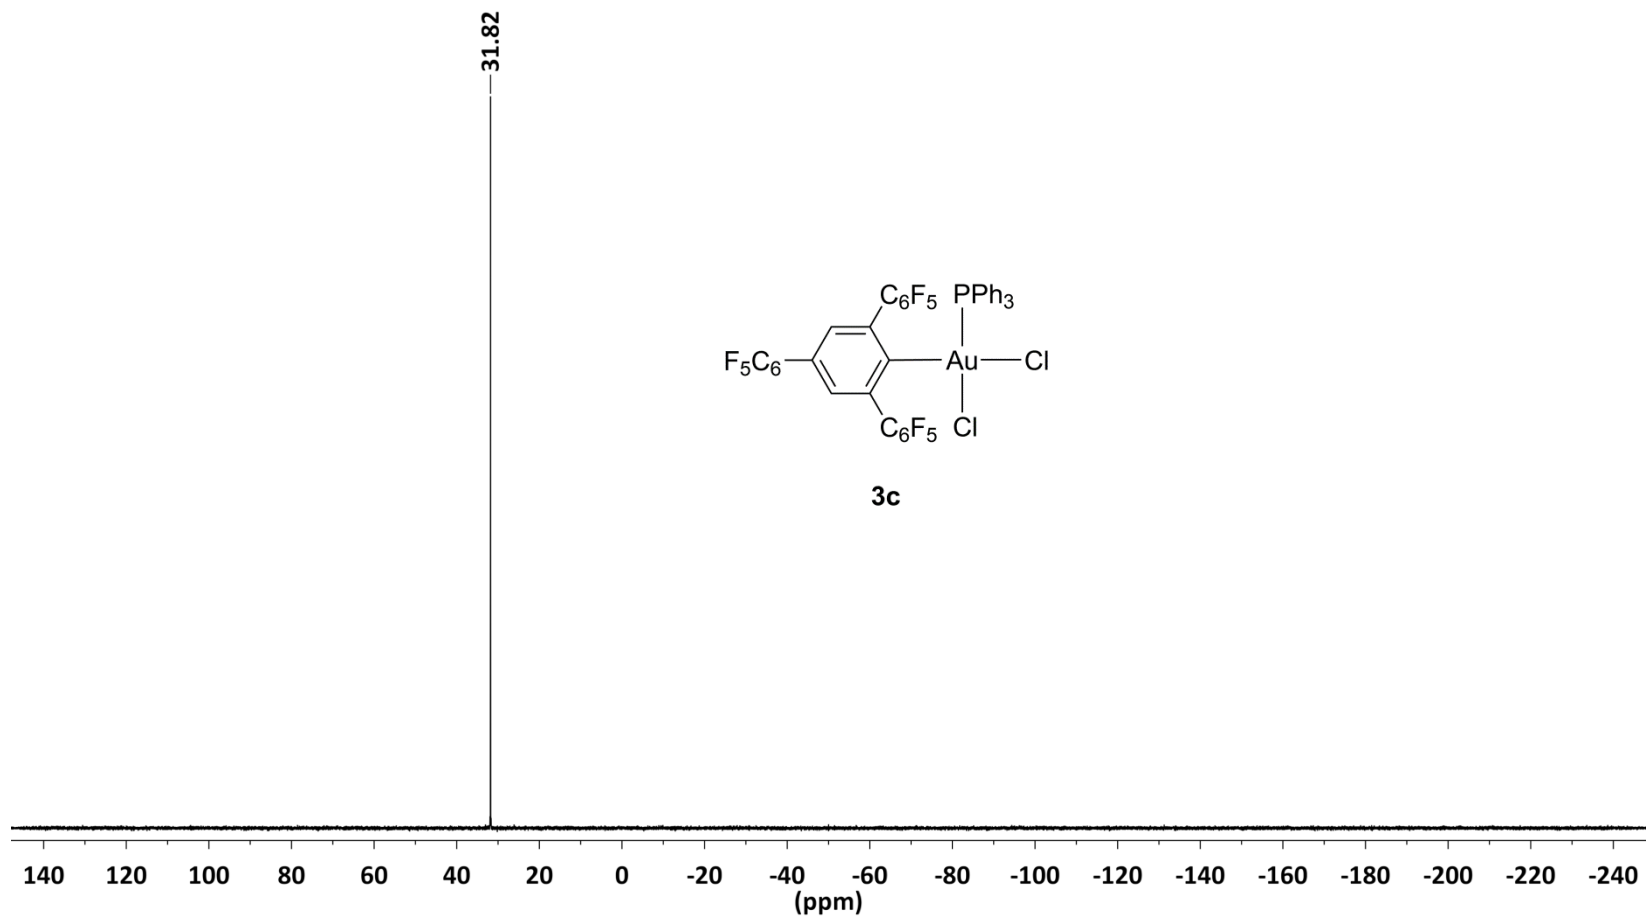

Figure S45.  $^{31}\text{P}\{^1\text{H}\}$  NMR ( $\text{CD}_3\text{CN}$ , 243 MHz) spectrum of 2,4,6-( $\text{C}_6\text{F}_5$ ) $_3$ - $\text{C}_6\text{H}_2$ AuCl $_2$ (PPh $_3$ ) (**3c**).

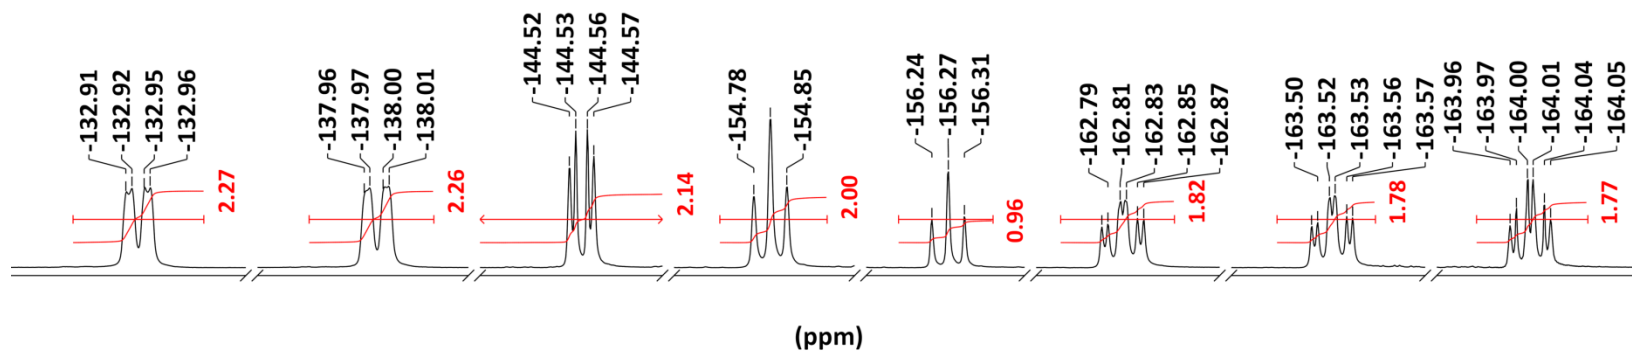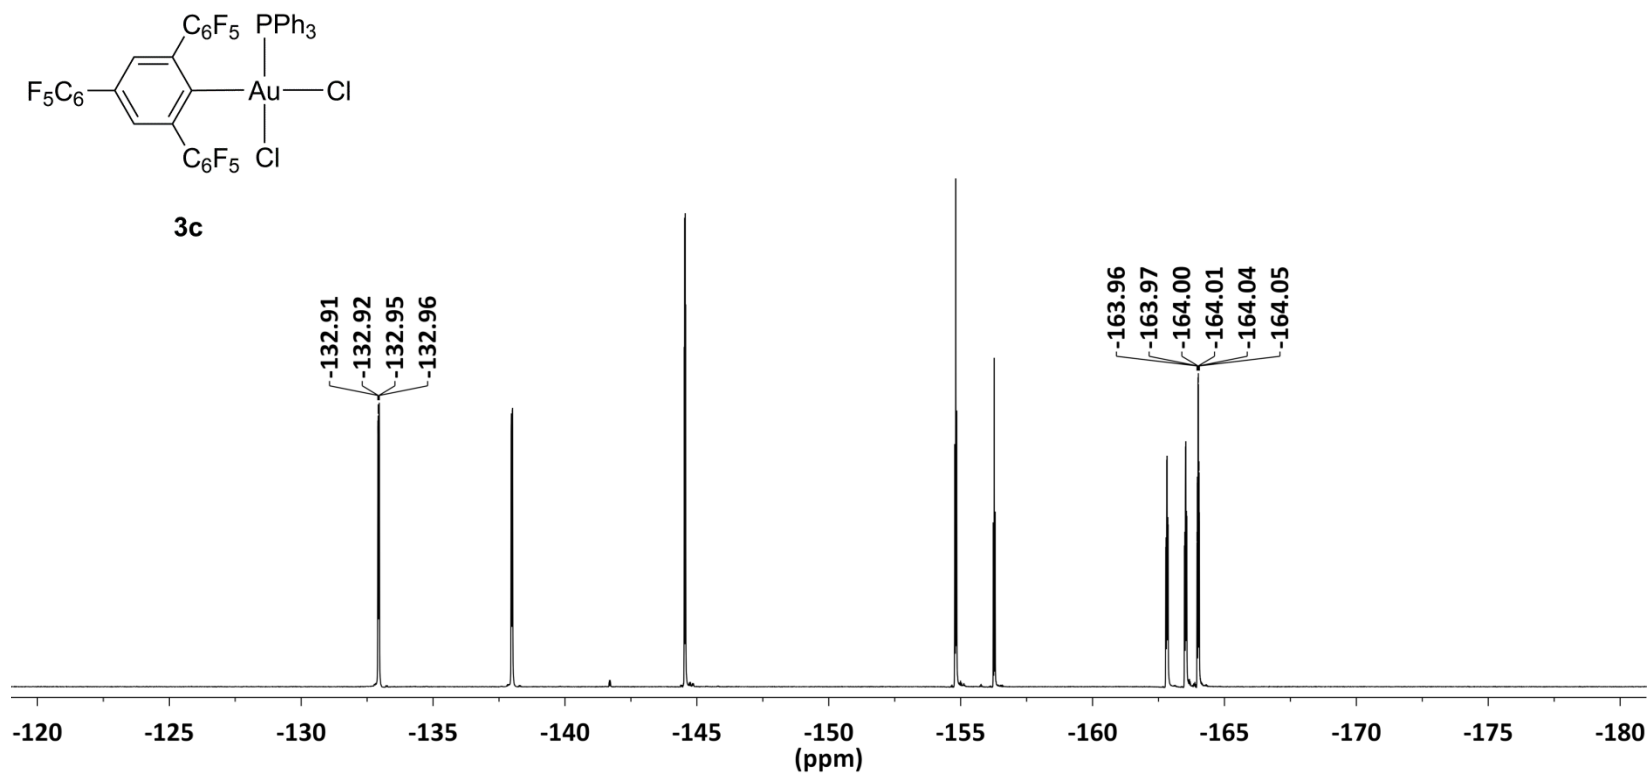

Figure S46.  $^{19}\text{F}\{^1\text{H}\}$  NMR ( $\text{CD}_3\text{CN}$ , 565 MHz) spectrum of 2,4,6-( $\text{C}_6\text{F}_5$ ) $_3$ - $\text{C}_6\text{H}_2\text{AuCl}_2(\text{PPh}_3)$  (**3c**).

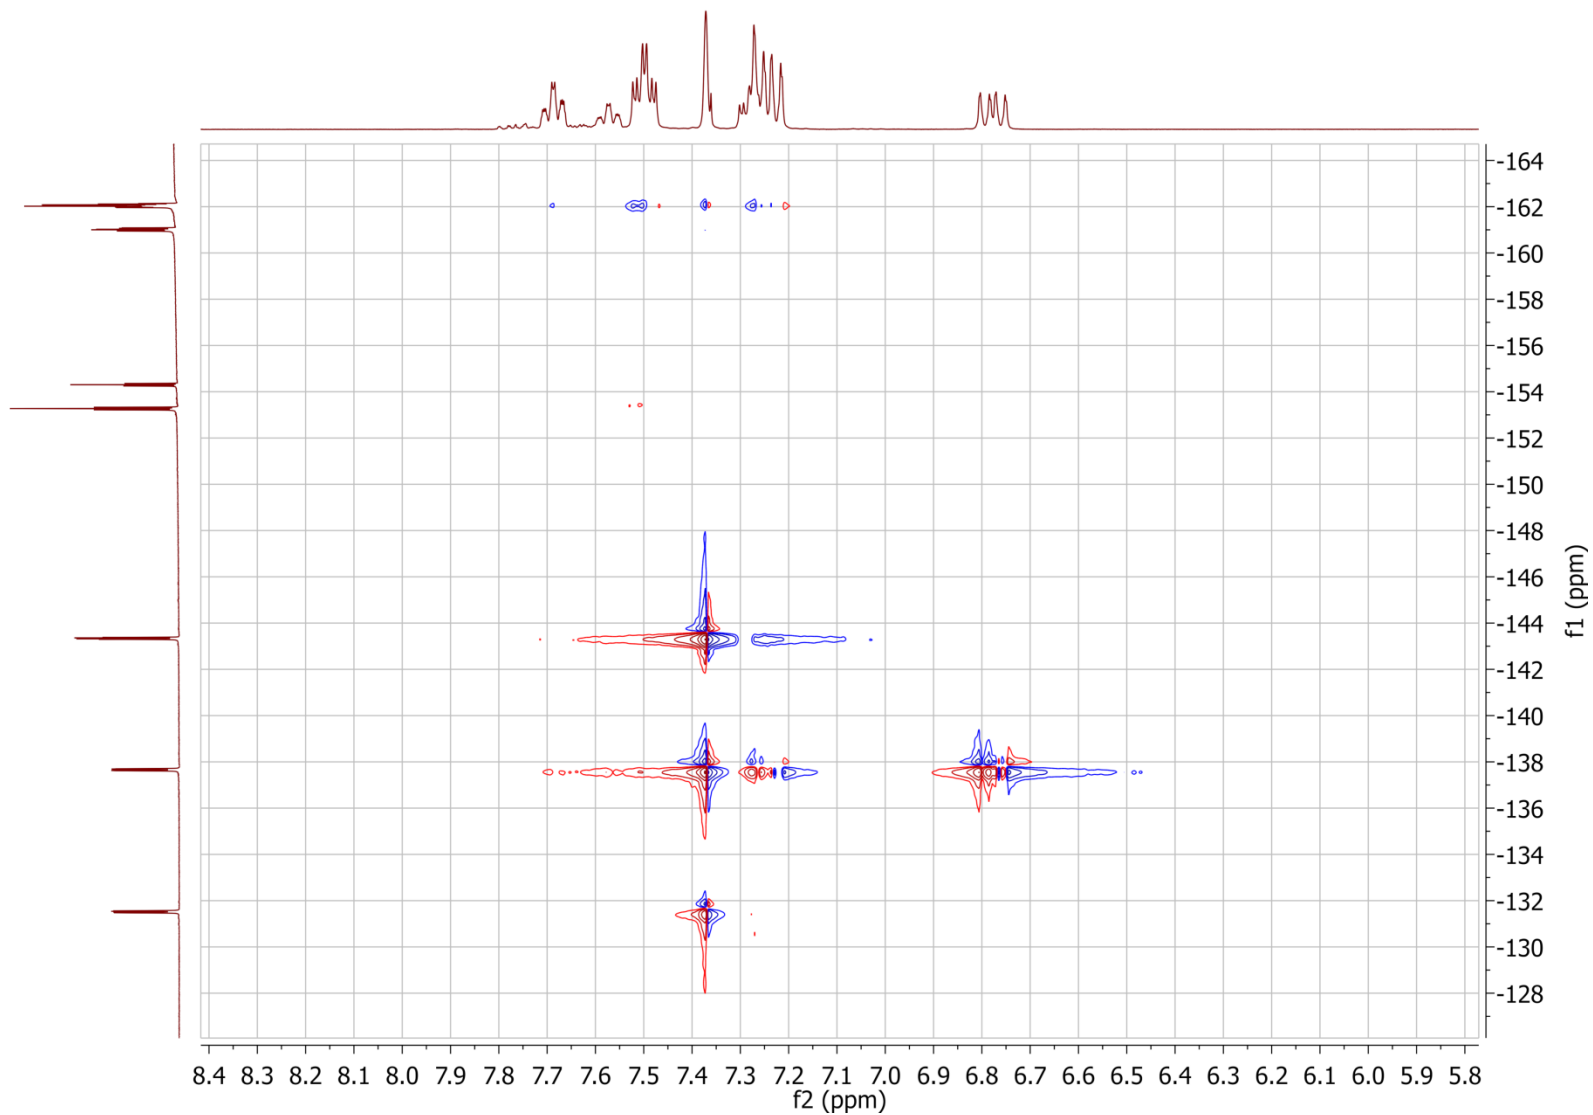

**Figure S47.**  $^1\text{H}$  –  $^{19}\text{F}$  HOESY ( $\text{CDCl}_3$ , 400 MHz and 376 MHz) spectrum of 2,4,6-( $\text{C}_6\text{F}_5$ ) $_3$ - $\text{C}_6\text{H}_2\text{AuCl}_2(\text{PPh}_3)$  (**3c**).

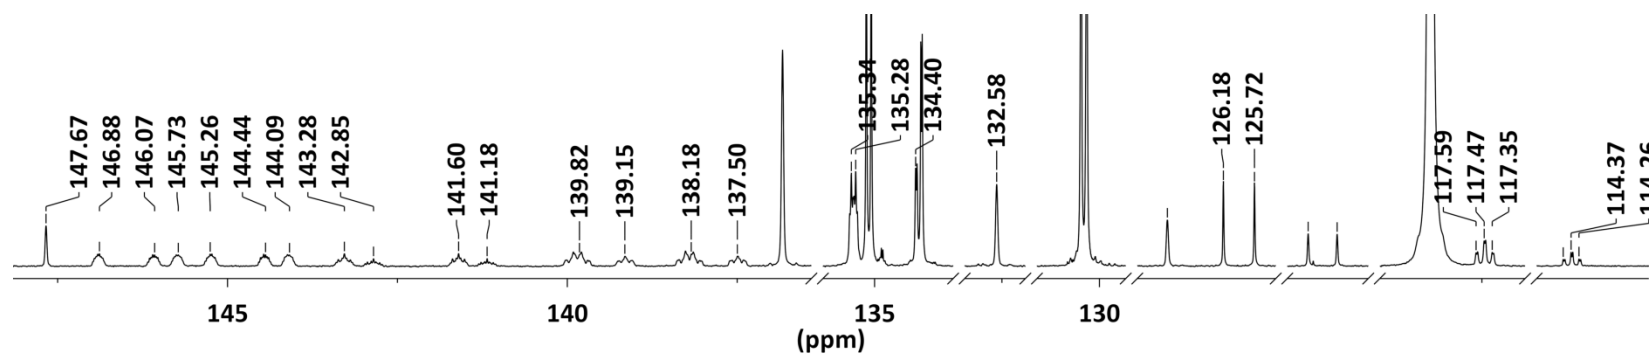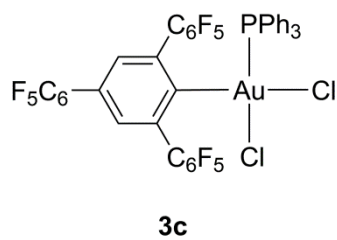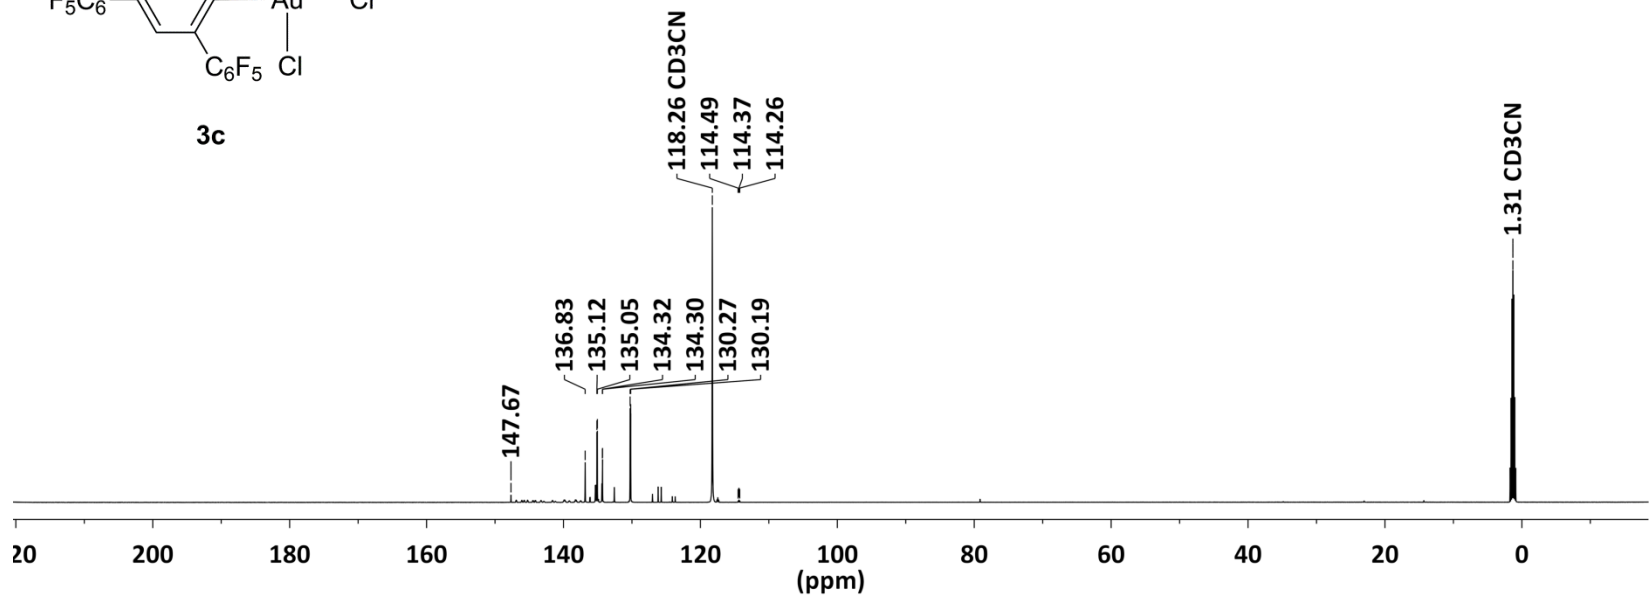

Figure S48.  $^{13}\text{C}\{^1\text{H}\}$  NMR ( $\text{CD}_3\text{CN}$ , 151 MHz) spectrum of 2,4,6-( $\text{C}_6\text{F}_5$ ) $_3$ - $\text{C}_6\text{H}_2$ AuCl $_2$ ( $\text{PPh}_3$ ) (**3c**).

# MS data

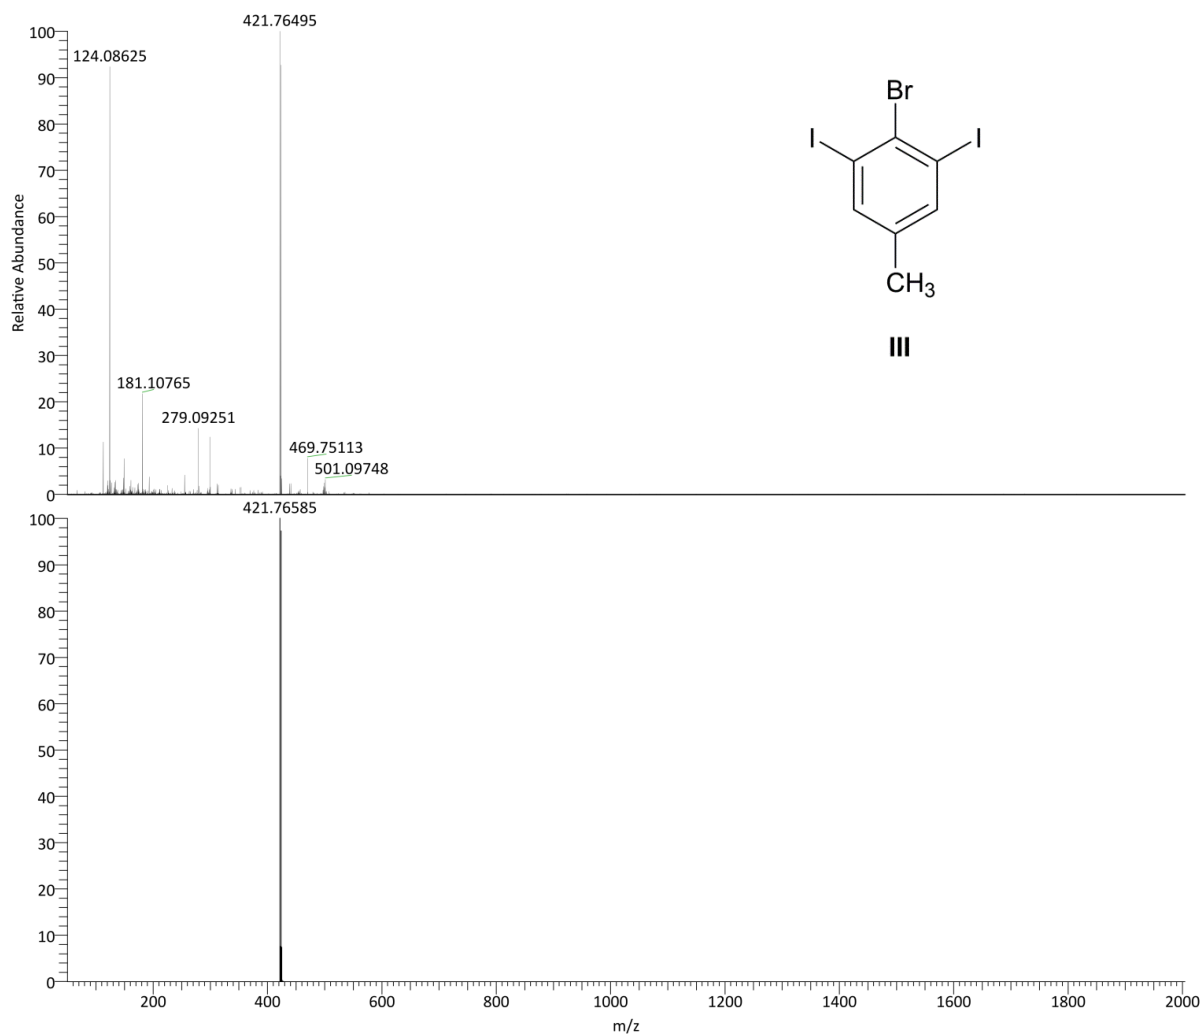

Figure S49. APCI(+) mass spectrum of 2,6-I<sub>2</sub>-4-CH<sub>3</sub>C<sub>6</sub>H<sub>2</sub>Br (III) (top) and calculated peak of [M]<sup>+</sup> (bottom).

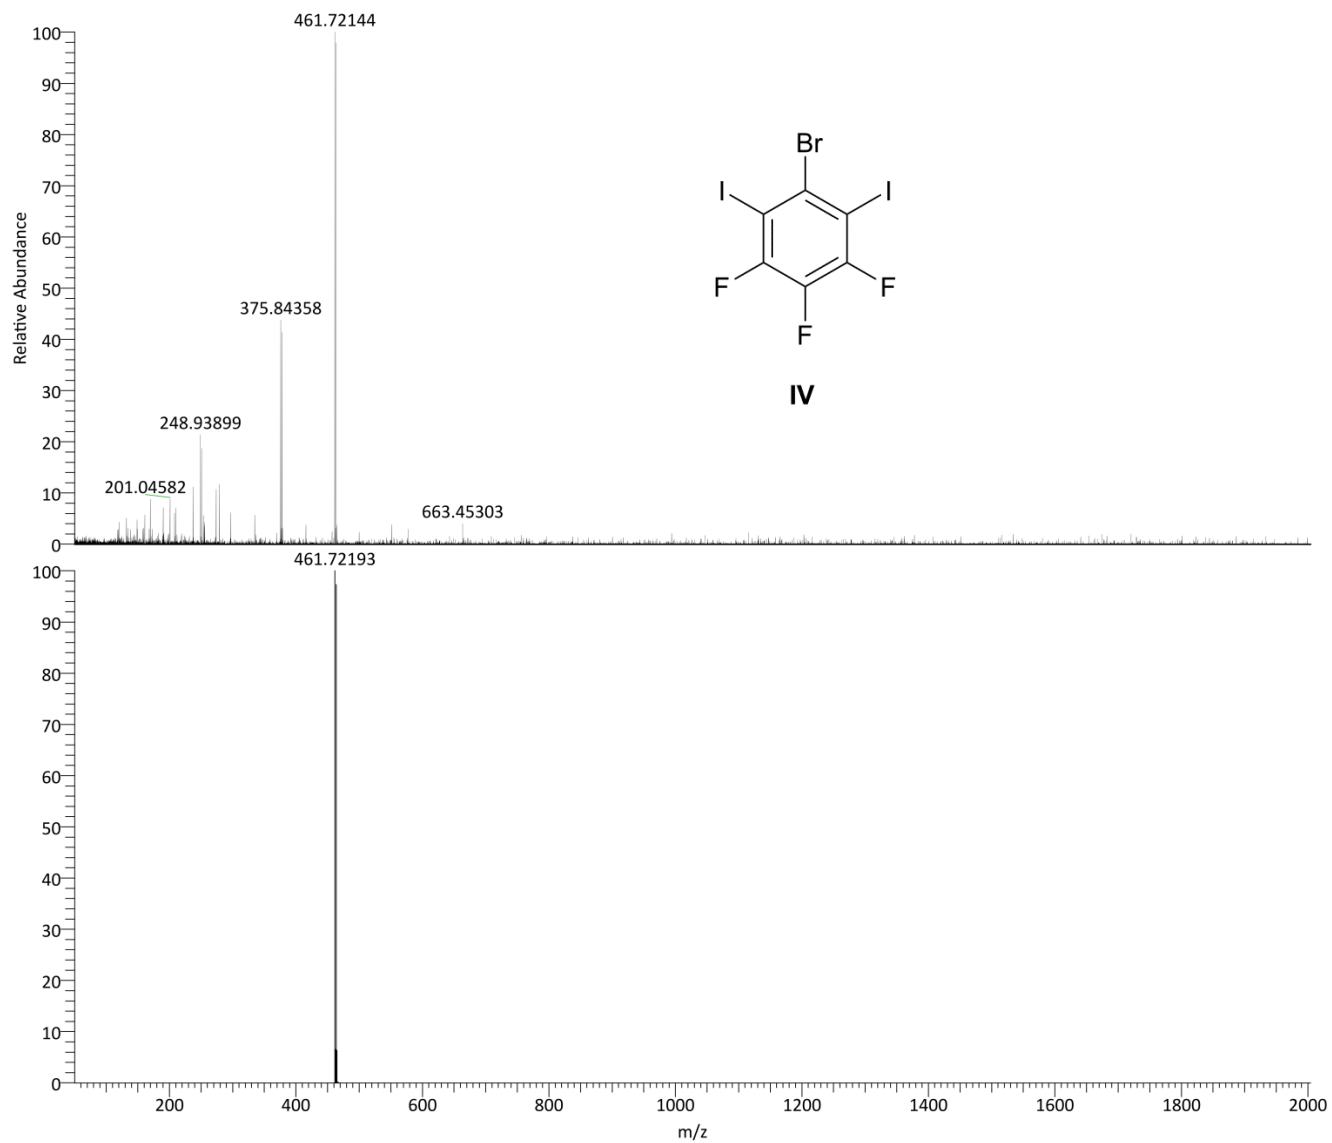

Figure S50. APCI(+) mass spectrum of 2,6-I<sub>2</sub>-C<sub>6</sub>F<sub>3</sub>Br (IV) (top) and calculated peak of [M]<sup>+</sup> (bottom).

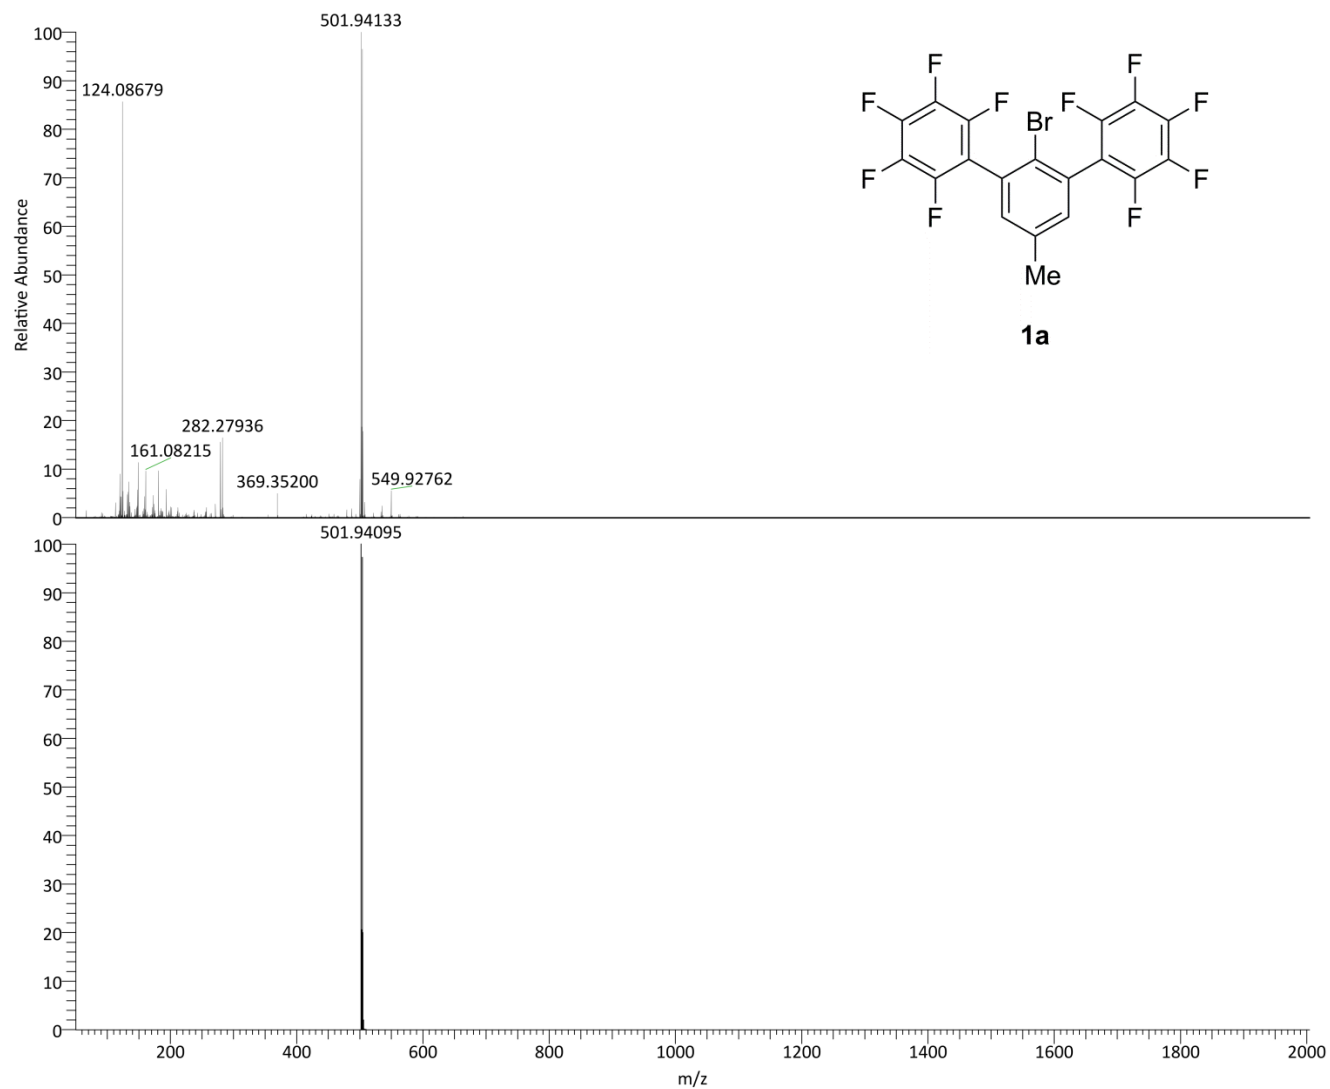

Figure S51. APCI(+) mass spectrum of 2,6-(C<sub>6</sub>F<sub>5</sub>)<sub>2</sub>-4-CH<sub>3</sub>C<sub>6</sub>H<sub>2</sub>Br (**1a**) (top) and calculated peak of [M]<sup>+</sup> (bottom).



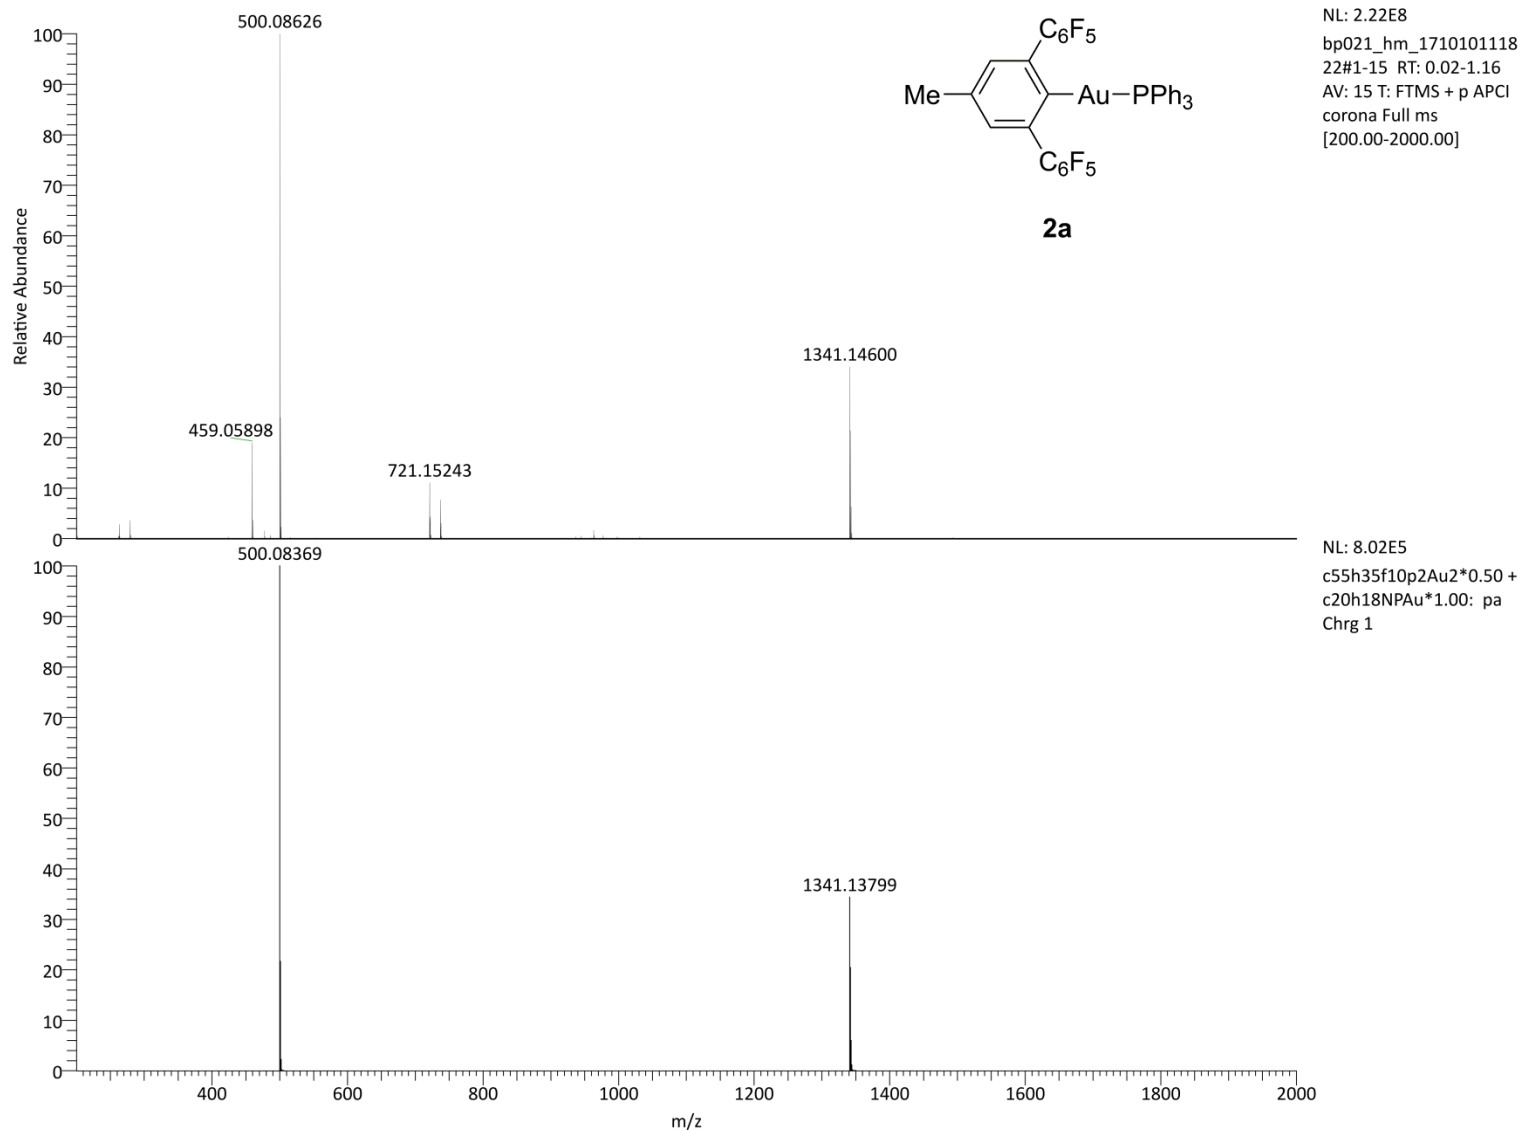

**Figure S52.** APCI(+) mass spectrum of 2,6-(C<sub>6</sub>F<sub>5</sub>)<sub>2</sub>-4-CH<sub>3</sub>C<sub>6</sub>H<sub>2</sub>Au(PPh<sub>3</sub>) (**2a**) (top) and calculated peak of [M + Au(PPh<sub>3</sub>)]<sup>+</sup> and [Au(PPh<sub>3</sub>)<sub>2</sub>]<sup>+</sup> (bottom).

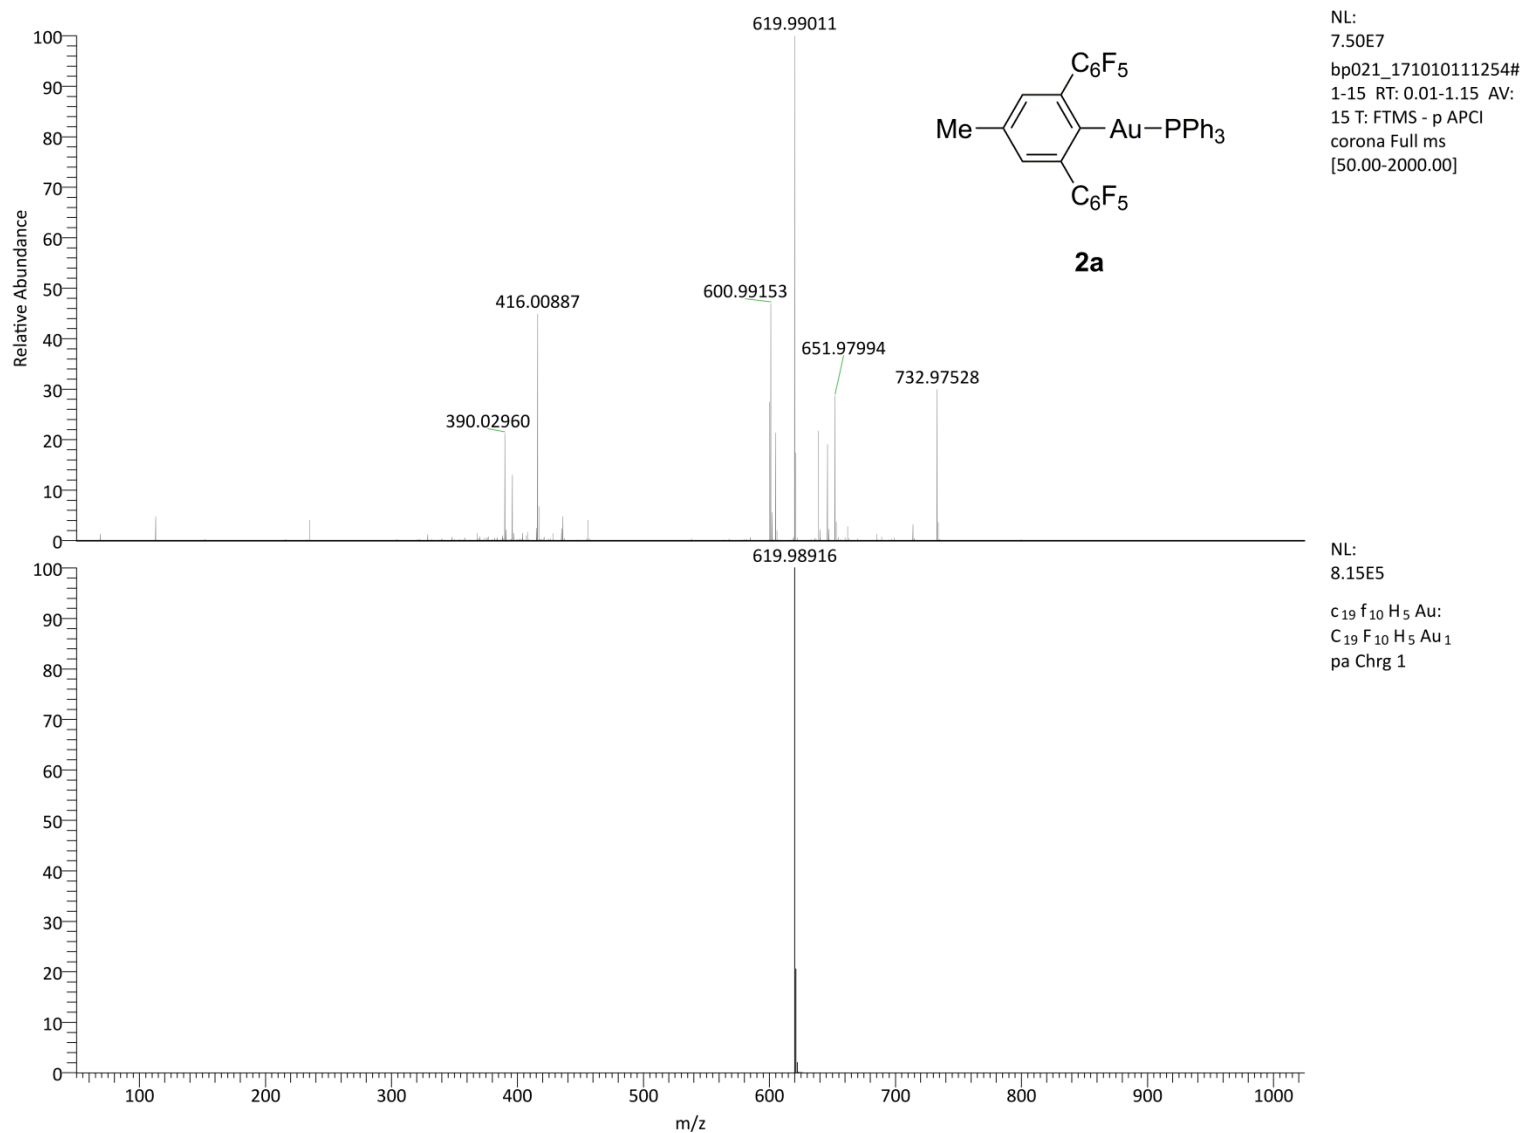

Figure S53. APCI(-) mass spectrum of 2,6-(C<sub>6</sub>F<sub>5</sub>)<sub>2</sub>-4-CH<sub>3</sub>C<sub>6</sub>H<sub>2</sub>Au(PPh<sub>3</sub>) (2a) (top) and calculated peak of [M - PPh<sub>3</sub>]<sup>-</sup> (bottom).

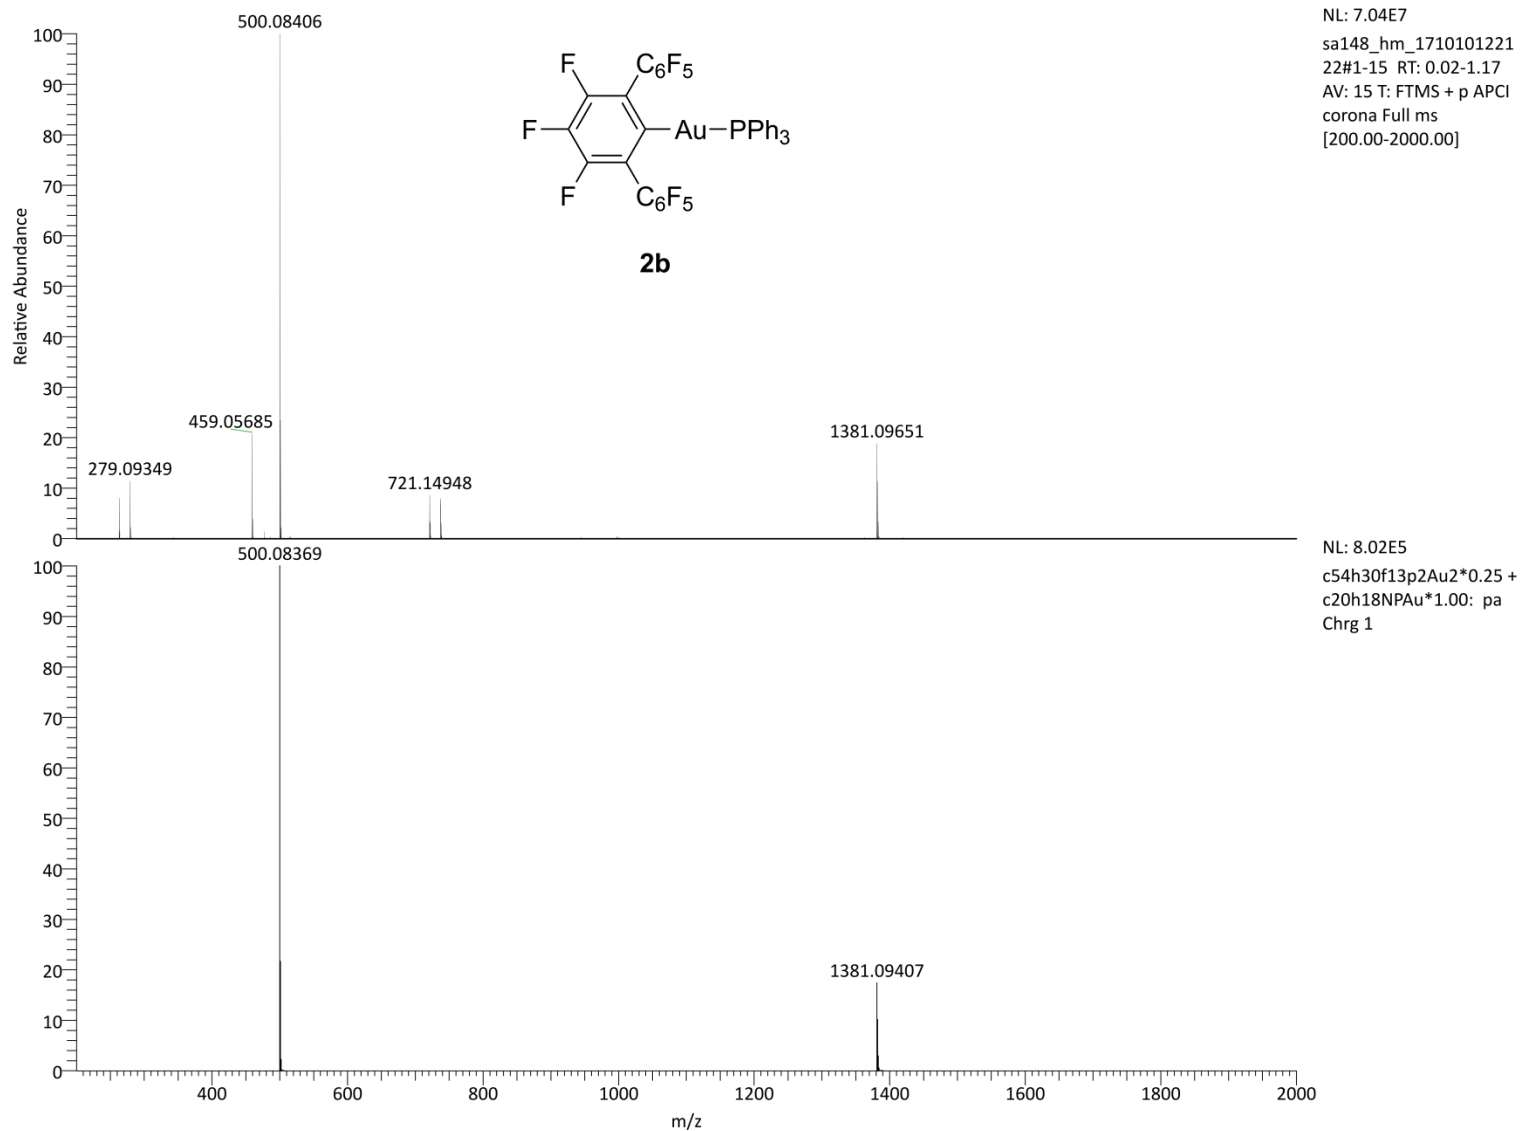

**Figure S54.** APCI(+) mass spectrum of 2,6-(C<sub>6</sub>F<sub>5</sub>)<sub>2</sub>-C<sub>6</sub>F<sub>3</sub>Au(PPh<sub>3</sub>) (**2b**) (top) and calculated peak of [M + Au(PPh<sub>3</sub>)]<sup>+</sup> and [Au(PPh<sub>3</sub>)<sub>2</sub>]<sup>+</sup> (bottom).

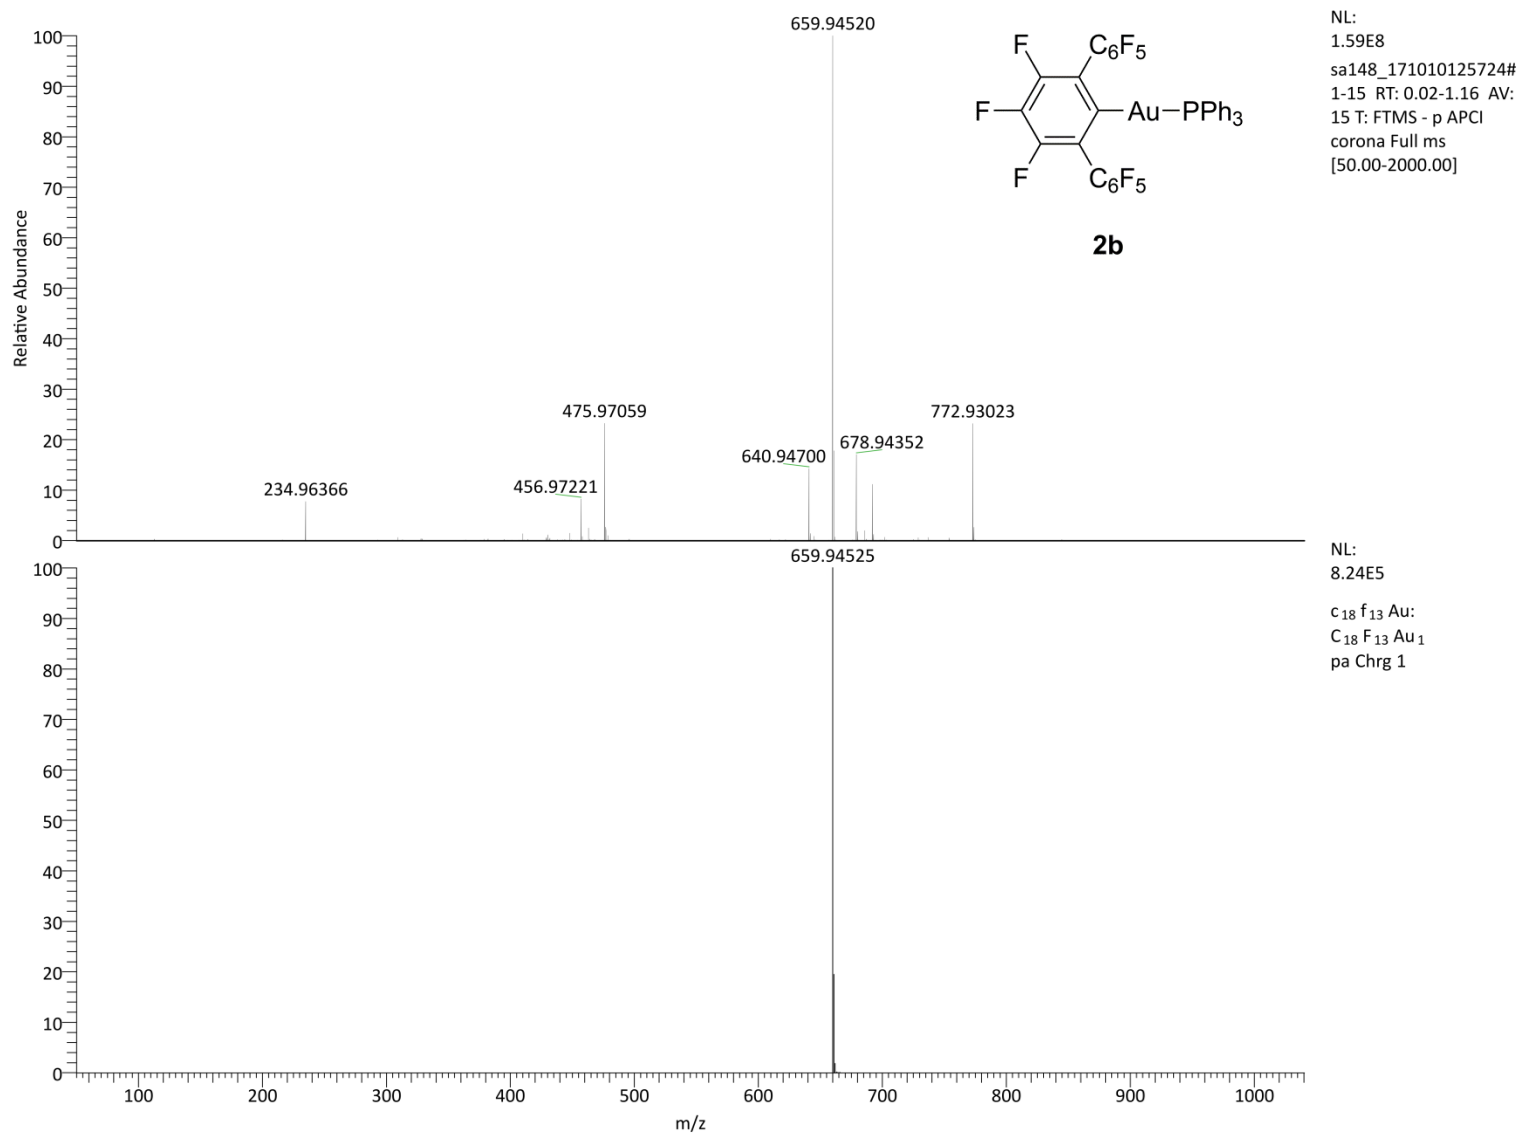

Figure S55. APCI(-) mass spectrum of 2,6-(C<sub>6</sub>F<sub>5</sub>)<sub>2</sub>-C<sub>6</sub>F<sub>3</sub>Au(PPh<sub>3</sub>) (**2b**) (top) and calculated peak of [M - PPh<sub>3</sub>]<sup>-</sup> (bottom).

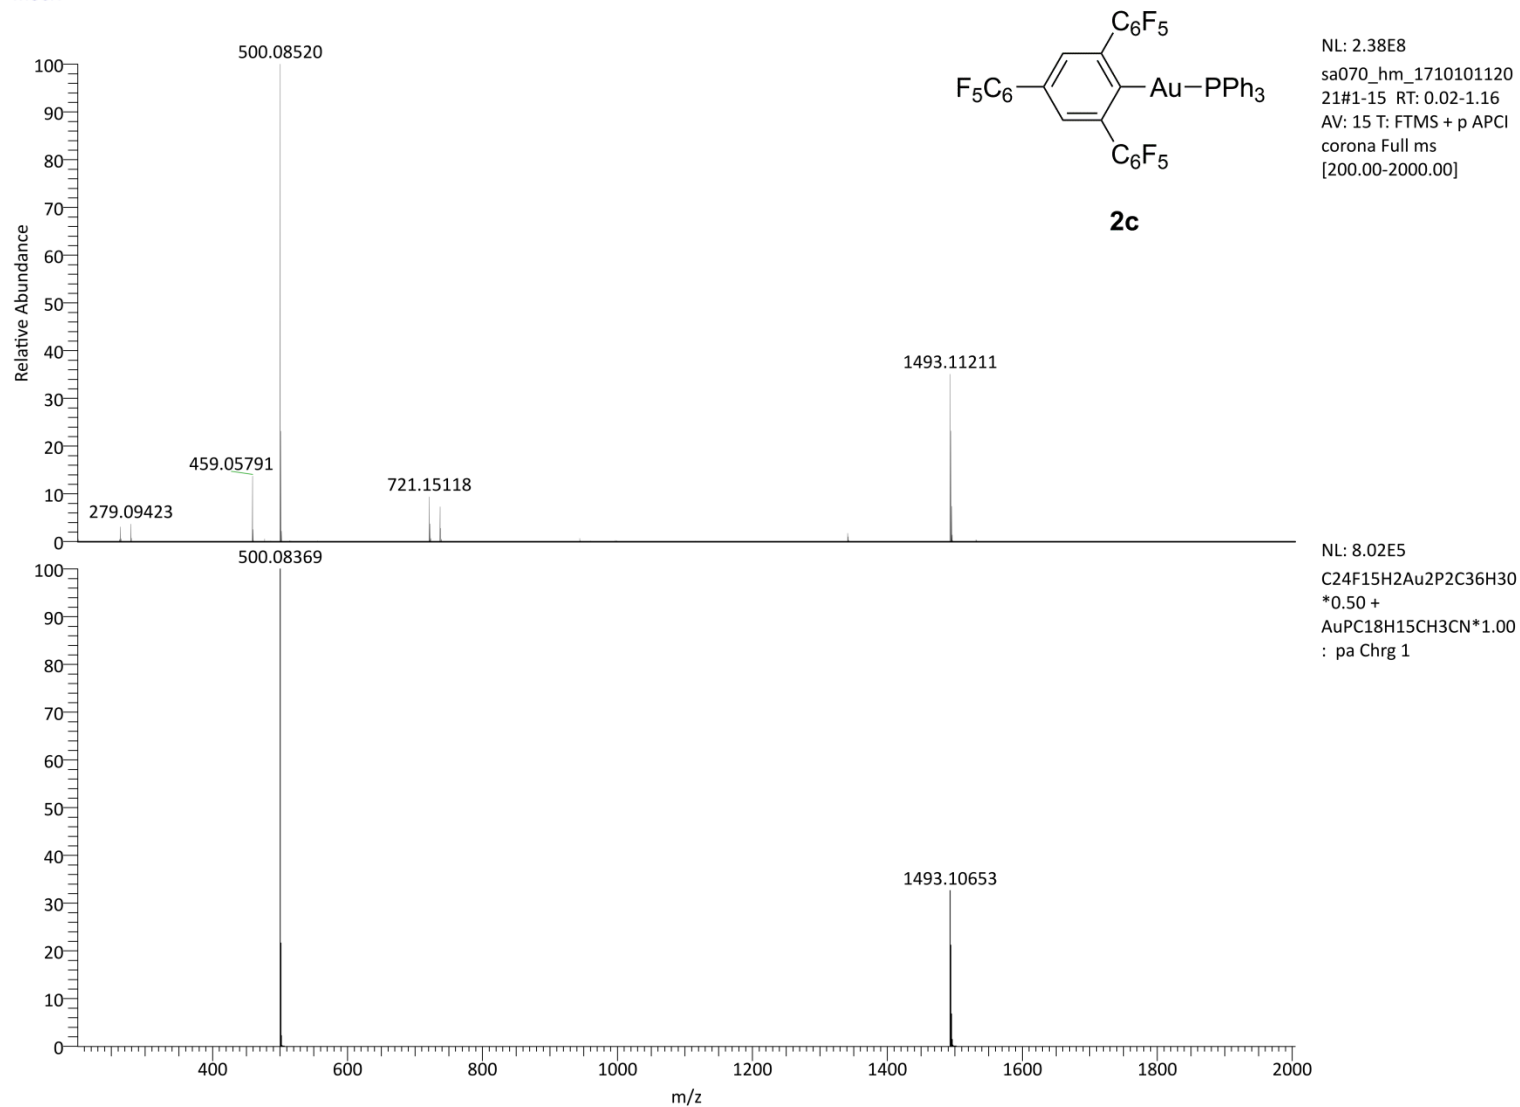

Figure S56. APCI(+) mass spectrum of 2,4,6-(C<sub>6</sub>F<sub>5</sub>)<sub>3</sub>-C<sub>6</sub>H<sub>2</sub>Au(PPh<sub>3</sub>) (**2c**) (top) and calculated peak of [M + Au(PPh<sub>3</sub>)]<sup>+</sup> and [Au(PPh<sub>3</sub>)<sub>2</sub>]<sup>+</sup> (bottom).

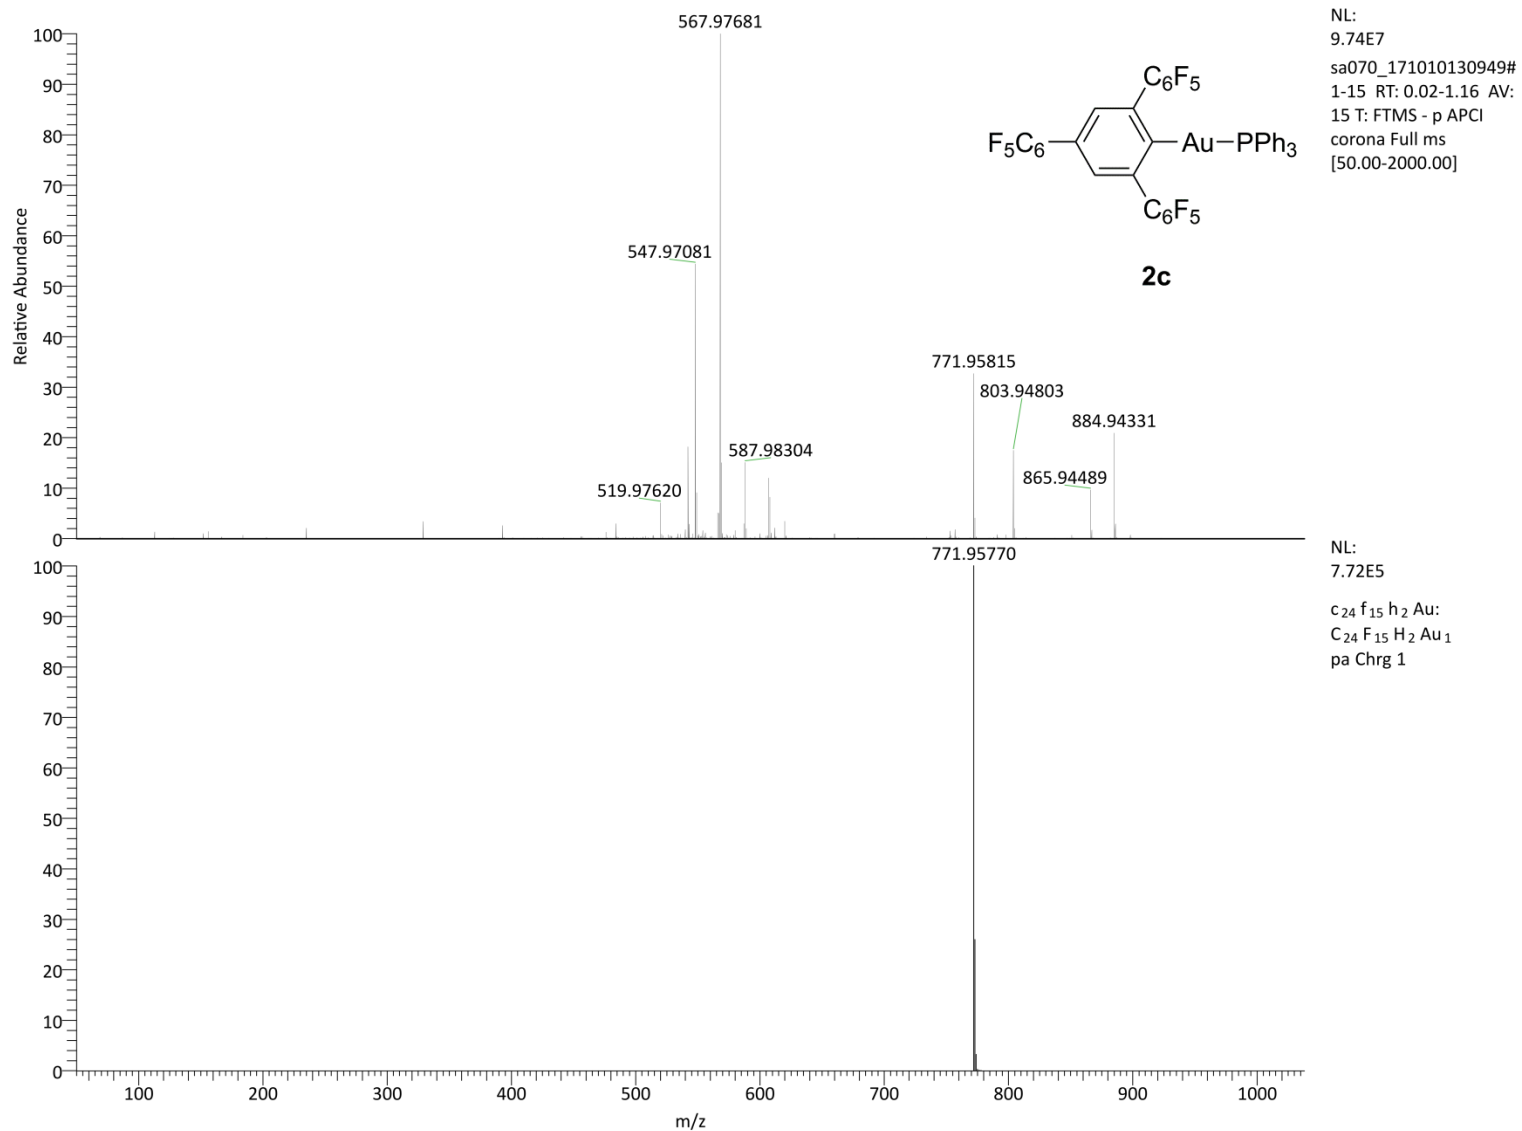

**Figure S57.** APCI(-) mass spectrum of 2,4,6-(C<sub>6</sub>F<sub>5</sub>)<sub>3</sub>-C<sub>6</sub>H<sub>2</sub>Au(PPh<sub>3</sub>) (**2c**) (top) and calculated peak of [M - PPh<sub>3</sub>]<sup>-</sup> (bottom).

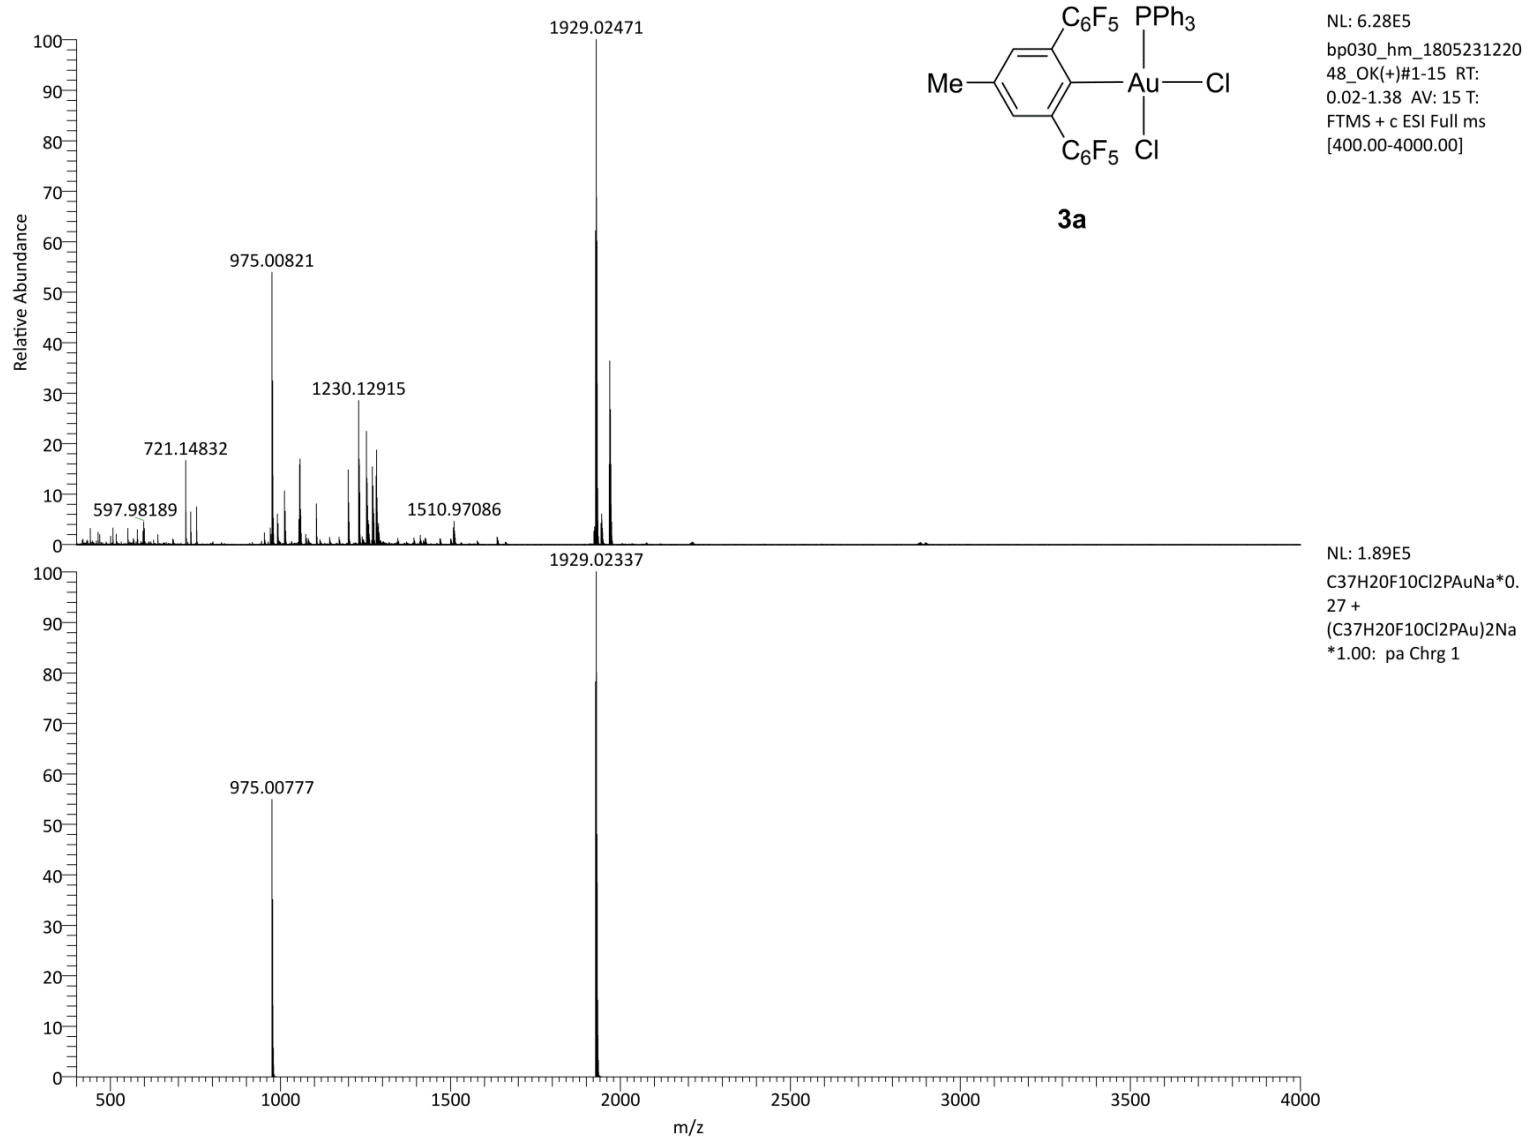

**Figure S58.** ESI(+)-mass spectrum of 2,6-(C<sub>6</sub>F<sub>5</sub>)<sub>2</sub>-4-CH<sub>3</sub>C<sub>6</sub>H<sub>2</sub>AuCl<sub>2</sub>(PPh<sub>3</sub>) (**3a**) (top) and calculated peak of [M<sub>2</sub><sup>+</sup> + Na] and [M<sup>+</sup> + Na] (bottom).

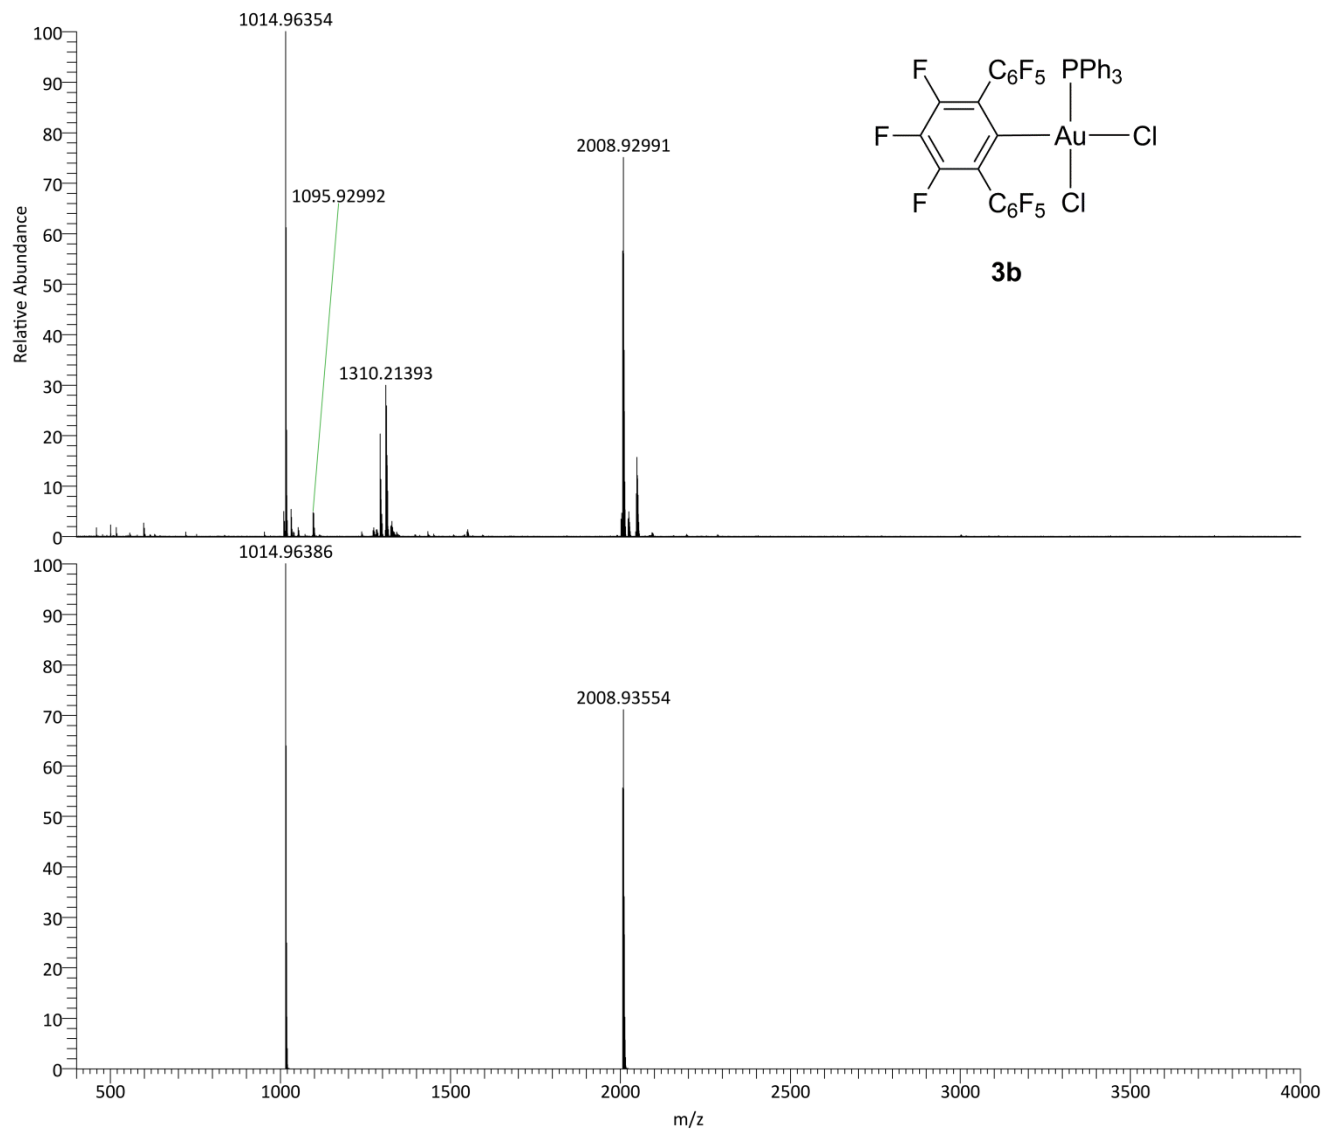

**Figure S59.** ESI(+)-mass spectrum of 2,6-(C<sub>6</sub>F<sub>5</sub>)<sub>2</sub>-C<sub>6</sub>F<sub>3</sub>AuCl<sub>2</sub>(PPh<sub>3</sub>) (**3b**) (top) and calculated peak of [M<sub>2</sub><sup>+</sup> + Na] and [M<sup>+</sup> + Na] (bottom).



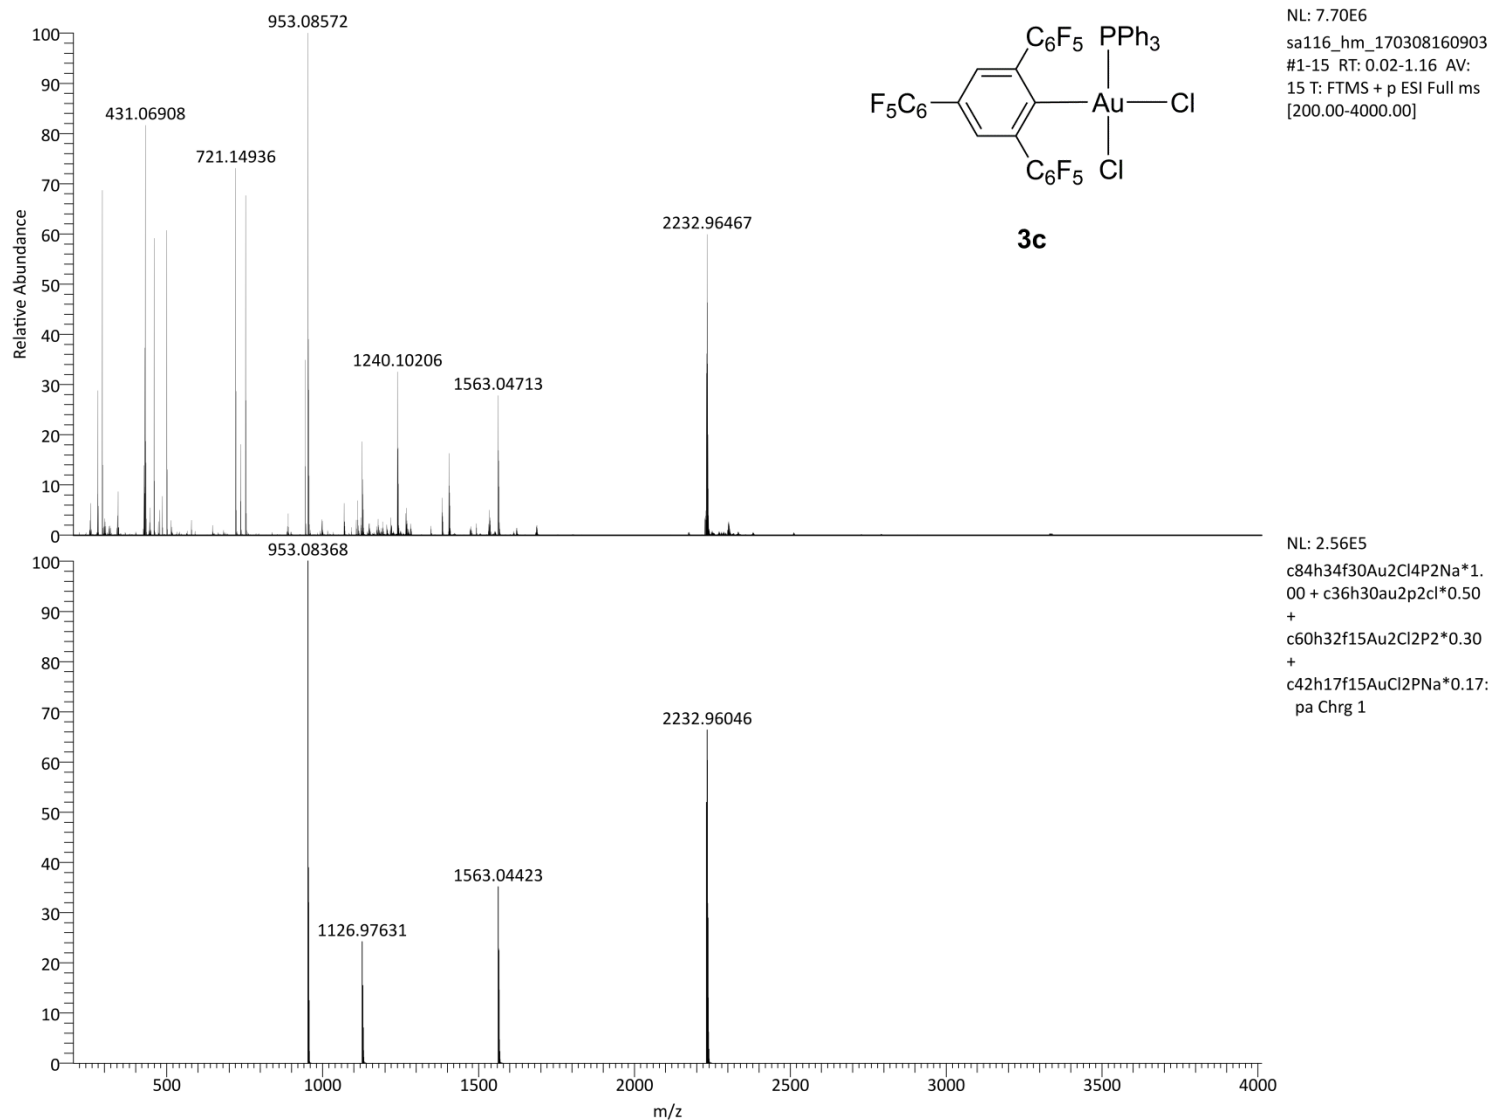

**Figure S60.** ESI(+)-mass spectrum of 2,4,6-(C<sub>6</sub>F<sub>5</sub>)<sub>3</sub>-C<sub>6</sub>H<sub>2</sub>AuCl<sub>2</sub>(PPh<sub>3</sub>) (**3c**) (top) and calculated peak of [M<sub>2</sub><sup>+</sup> + Na], [M<sup>+</sup> + Au(PPh<sub>3</sub>)], [M<sup>+</sup> + Na] and [Au<sub>2</sub>Cl(PPh<sub>3</sub>)<sub>2</sub><sup>+</sup>] (100) (bottom).

## Computational study

In order to evaluate the interactions energies between the molecules in the crystals, counterpoise corrected calculations were performed on pairs of molecules, generated using CrystalExplorer 17.5 running on an Ubuntu 16.04 virtual machine,<sup>20</sup> and the script for HPC computing with Tonto.<sup>21</sup>

In order to obtain the Gaussian input files with CrystalExplorer, in the crystallographic files the gold atoms were replaced with copper atoms, element for which 6-31G basis set is available. These new crystallographic files were loaded into CrystalExplorer. The molecules within a radius of 3.8 Å around the molecule of interest were generated. Then using the tonto\_hpc.py script the generation of the Gaussian input files was possible. In CrystalExplorer, the X–H bonds normalization was used.

In the Gaussian input files generated with CrystalExplorer, the copper atoms were replaced with gold atoms. Calculations were performed with Gaussian 09 rev. E01 using B3LYP functional,<sup>22</sup> LANL2DZ basis set with pseudopotentials for gold and 6-31G(d,p) 6d 10f basis set for all the other atoms.<sup>23-25</sup> Dispersion effects were accounted using D3 version of Grimme's dispersion with Becke-Johnson damping.<sup>26</sup>

Compact archive entries resulting from the single point calculations are provided as supporting info (*vide infra*). Corrected complexation energies of the pairs of molecules generated with CrystalExplorer are listed in Table S7.

Quantum theory of atoms in molecules was used to evaluate the local properties at the bond critical points (BCP) of the F...F interactions (see Tables S8 and S9). Wave functions used in the QTAIM study were obtained using Gaussian 09 rev. E01,<sup>22</sup> with M06-2X functional,<sup>27</sup> def2-SVP basis set,<sup>28</sup> and D3 version of Grimme's dispersion.<sup>29</sup> Analysis of the wave functions was performed with AIMALL 19.10.12.<sup>30</sup>

**Table S7.** Corrected complexation energies (in kcal/mole) of pairs of molecules generated with CrystalExplorer. The values in bold correspond to the pairs of molecules that exhibit F...F contacts.

| Compound / Pair | 2a                 | 2b(1) <sup>†</sup>        | 2b(2) <sup>†</sup>       | 2c                       | 3a                        | 3b                       | 3c           |
|-----------------|--------------------|---------------------------|--------------------------|--------------------------|---------------------------|--------------------------|--------------|
| 1               | -4.09              | <b>-15.03<sup>‡</sup></b> | -3.64                    | -2.26                    | -6.93                     | -11.79                   | -2.32        |
| 2               | -13.48             | -7.88                     | -3.37                    | <b>-15.20</b>            | -15.02                    | -13.57                   | <b>-4.46</b> |
| 3               | -6.11              | -5.57                     | -7.18                    | -12.19                   | -20.26                    | -1.61                    | -16.65       |
| 4               | -9.18              | <b>-5.75<sup>‡</sup></b>  | -5.89                    | -3.38                    | -20.25                    | -10.21                   | -5.53        |
| 5               | -8.31              | <b>-10.44</b>             | -4.32                    | -10.98                   | -3.57                     | -1.33                    | -3.9         |
| 6               | -10.89             | -3.37                     | <b>-10.44</b>            | <b>-23.56</b>            | -3.57                     | <b>-4.15<sup>‡</sup></b> | -0.77        |
| 7               | -4.53              | -3.64                     | -19.14                   | -2.04                    | <b>-15.35<sup>‡</sup></b> | -1.02                    | -3.6         |
| 8               | -2.92 <sup>#</sup> | -4.32                     | <b>-4.67<sup>§</sup></b> | -3.59                    | -1.48                     | -1.98                    | -12.02       |
| 9               | -3.70              | -4.51                     | -5.35                    | -1.79                    | -0.43                     | -3.89                    | -1.08        |
| 10              | -12.13             | -7.18                     | -10.8                    | <b>-1.94<sup>‡</sup></b> | -6.93                     | -10.18                   | -9.02        |
| 11              | -1.42              | -2.84                     | -2.98                    | -1.27                    |                           | -2.67                    | -1.66        |
| 12              |                    | -2.90                     | -5.57                    |                          |                           | <b>-1.10</b>             | -4.35        |
| 13              |                    | -5.35                     | -2.84                    |                          |                           | <b>-4.88<sup>‡</sup></b> | -19.59       |
| 14              |                    | -19.14                    | -12.77                   |                          |                           |                          | -9.03        |
| 15              |                    |                           |                          |                          |                           |                          | -0.84        |
| 16              |                    |                           |                          |                          |                           |                          | -0.92        |

<sup>†</sup> Compound 2b contains two molecules in the asymmetric unit. <sup>‡</sup> There are two contacts F...F between the calculated molecules. <sup>§</sup> There are four F...F contacts between the calculated molecules. <sup>#</sup> There is only a F...F contact of 2.987 Å [ $\Sigma r_{vdw}(F,F)$  2.94 Å].

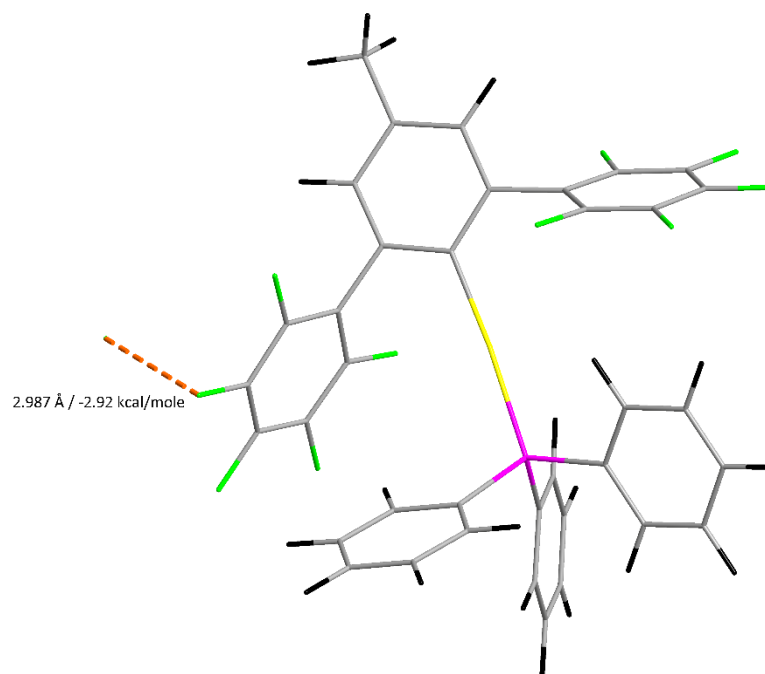

**Figure S61.** F...F contacts in **2a**. The complexation corrected energies are listed after the interatomic distances. These values correspond to the complexation energy between pairs of molecules, not only to the F...F interactions.

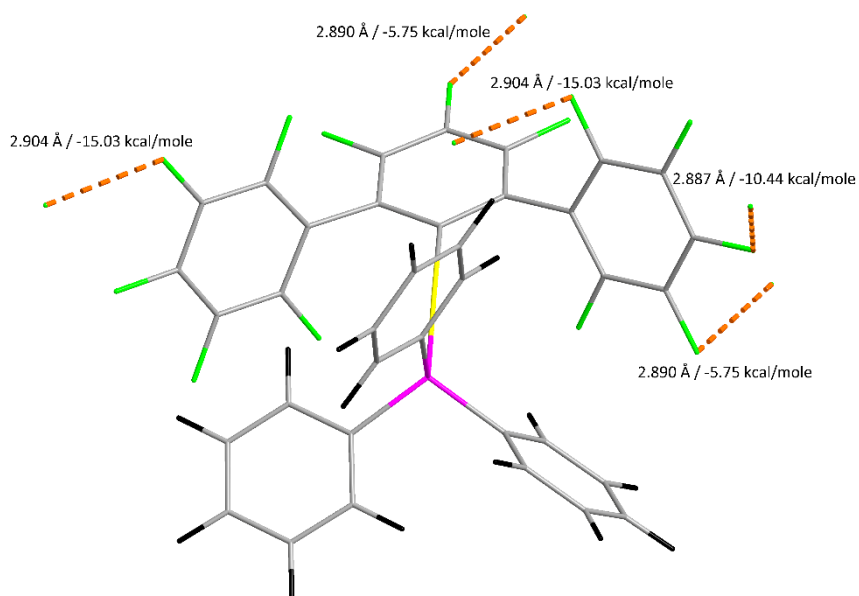

**Figure S62.** F...F contacts in **2b**, molecule 1. The complexation corrected energies are listed after the interatomic distances. These values correspond to the complexation energy between pairs of molecules, not only to the F...F interactions.

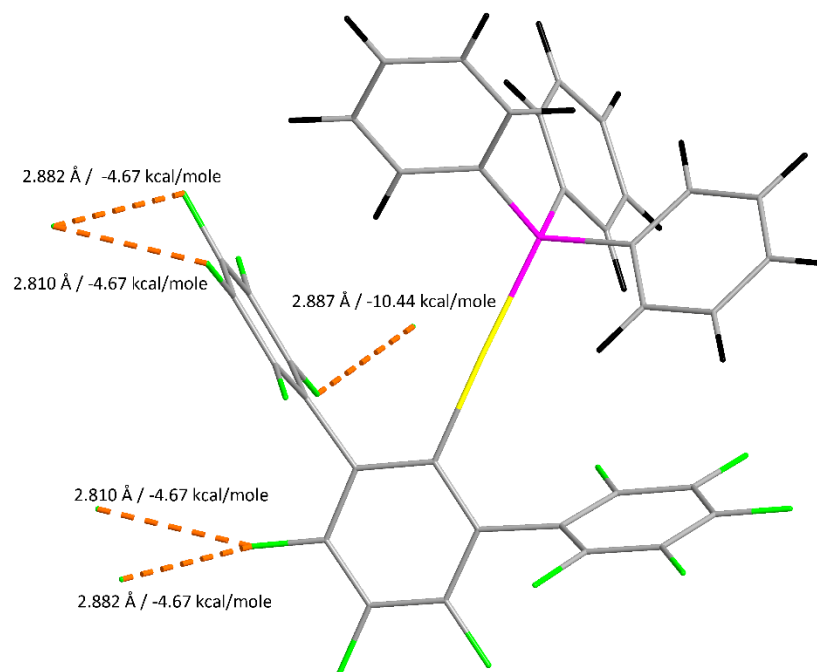

**Figure S63.** F...F contacts in **2b**, molecule 2. The complexation corrected energies are listed after the interatomic distances. These values correspond to the complexation energy between pairs of molecules, not only to the F...F interactions.

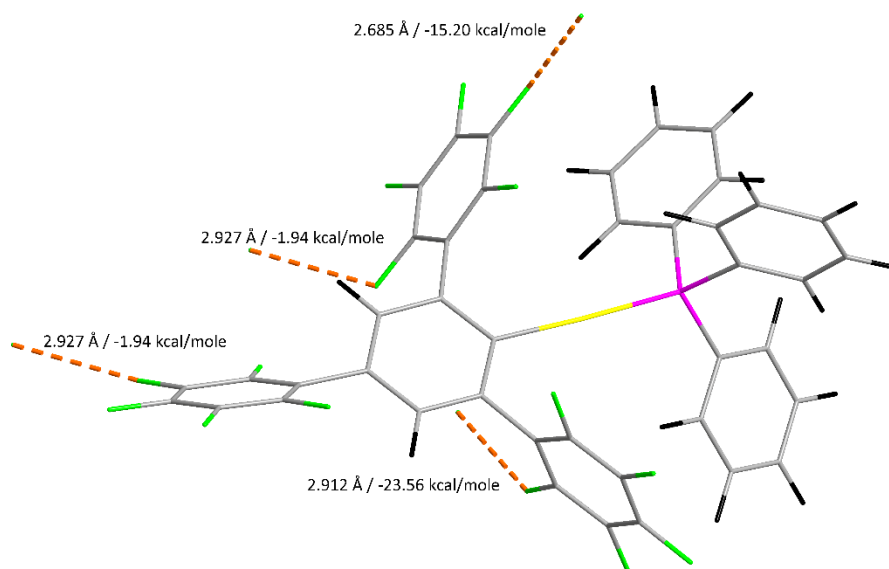

**Figure S64.** F...F contacts in **2c**. The complexation corrected energies are listed after the interatomic distances. These values correspond to the complexation energy between pairs of molecules, not only to the F...F interactions.

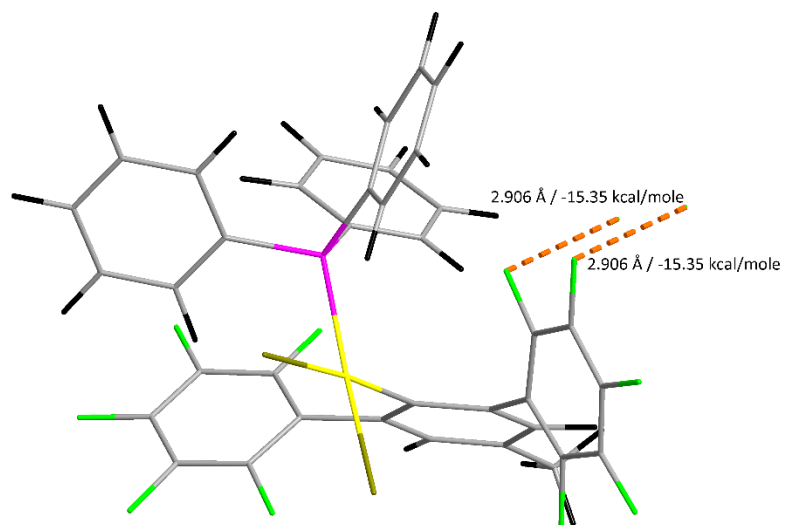

**Figure S65.** F...F contacts in **3a**. The complexation corrected energies are listed after the interatomic distances. These values correspond to the complexation energy between pairs of molecules, not only to the F...F interactions.

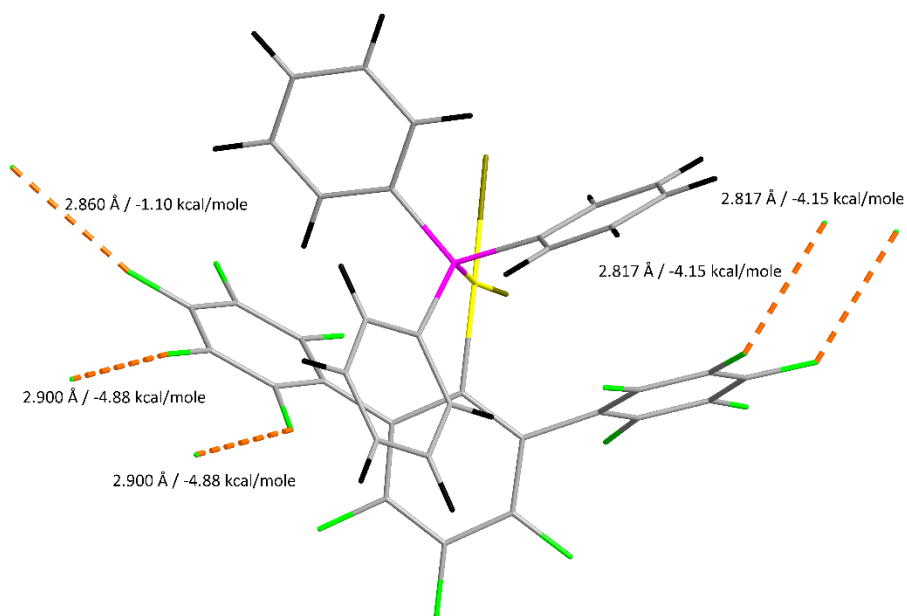

**Figure S66.** F...F contacts in **3b**. The complexation corrected energies are listed after the interatomic distances. These values correspond to the complexation energy between pairs of molecules, not only to the F...F interactions.

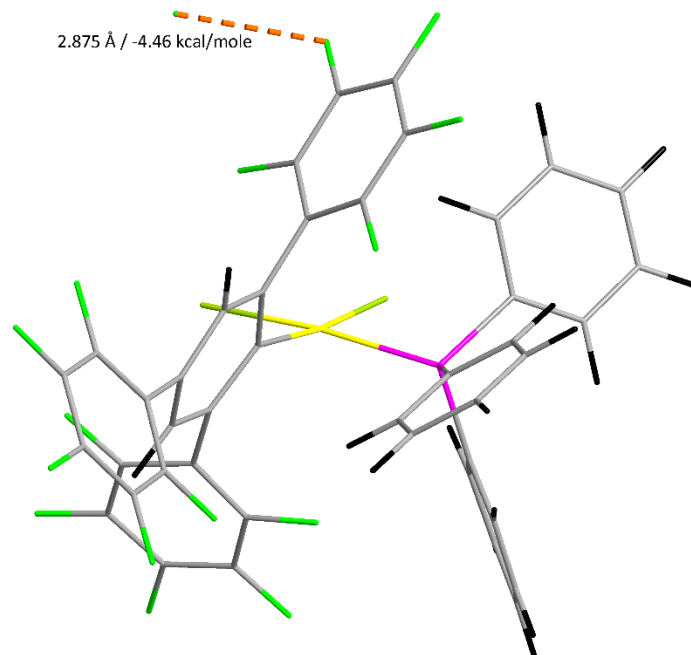

**Figure S67.** F...F contacts in **3c**. The complexation corrected energies are listed after the interatomic distances. These values correspond to the complexation energy between pairs of molecules, not only to the F...F interactions.

**Table S8.** BCP Properties (in a.u.) of F...F Interactions in Compounds **2a-2c**.<sup>†</sup>

| Compound   | Pair <sup>‡</sup> | $\rho$          | $\nabla^2\rho$  | BPL             | V                | G               | K                | L                | $ V(\text{rb}) /G(\text{rb})$ | H               |
|------------|-------------------|-----------------|-----------------|-----------------|------------------|-----------------|------------------|------------------|-------------------------------|-----------------|
| <b>2a</b>  | <b>8</b>          | <b>0.005527</b> | <b>0.031760</b> | <b>5.647540</b> | <b>-0.005431</b> | <b>0.006686</b> | <b>-0.001254</b> | <b>-0.007940</b> | <b>0.81</b>                   | <b>0.001255</b> |
|            | 8                 | 0.000459        | 0.005253        | 6.991956        | -0.000392        | 0.000852        | -0.000461        | -0.001313        | 0.46                          | 0.000460        |
|            | 8                 | 0.000459        | 0.005253        | 6.991971        | -0.000392        | 0.000852        | -0.000461        | -0.001313        | 0.46                          | 0.000460        |
| <b>2b1</b> | <b>1</b>          | <b>0.002419</b> | <b>0.016518</b> | <b>6.238122</b> | <b>-0.002014</b> | <b>0.003072</b> | <b>-0.001058</b> | <b>-0.004129</b> | <b>0.66</b>                   | <b>0.001058</b> |
|            | <b>4</b>          | <b>0.004404</b> | <b>0.028184</b> | <b>5.720995</b> | <b>-0.004382</b> | <b>0.005714</b> | <b>-0.001332</b> | <b>-0.007046</b> | <b>0.77</b>                   | <b>0.001332</b> |
|            | <b>5</b>          | <b>0.005531</b> | <b>0.031702</b> | <b>5.638692</b> | <b>-0.005478</b> | <b>0.006702</b> | <b>-0.001224</b> | <b>-0.007925</b> | <b>0.82</b>                   | <b>0.001224</b> |
|            | <b>5</b>          | <b>0.005769</b> | <b>0.034237</b> | <b>5.464605</b> | <b>-0.006101</b> | <b>0.007330</b> | <b>-0.001229</b> | <b>-0.008559</b> | <b>0.83</b>                   | <b>0.001229</b> |
| <b>2b2</b> | <b>6</b>          | <b>0.005531</b> | <b>0.031702</b> | <b>5.638692</b> | <b>-0.005478</b> | <b>0.006702</b> | <b>-0.001224</b> | <b>-0.007925</b> | <b>0.82</b>                   | <b>0.001224</b> |
|            | <b>6</b>          | <b>0.005769</b> | <b>0.034237</b> | <b>5.464605</b> | <b>-0.006101</b> | <b>0.007330</b> | <b>-0.001229</b> | <b>-0.008559</b> | <b>0.83</b>                   | <b>0.001229</b> |
|            | <b>8</b>          | <b>0.006159</b> | <b>0.035287</b> | <b>5.449960</b> | <b>-0.006457</b> | <b>0.007639</b> | <b>-0.001182</b> | <b>-0.008822</b> | <b>0.85</b>                   | <b>0.001182</b> |
|            | <b>8</b>          | <b>0.006810</b> | <b>0.037989</b> | <b>5.316416</b> | <b>-0.007255</b> | <b>0.008376</b> | <b>-0.001121</b> | <b>-0.009497</b> | <b>0.87</b>                   | <b>0.001121</b> |
|            | <b>8</b>          | <b>0.006810</b> | <b>0.037989</b> | <b>5.316407</b> | <b>-0.007256</b> | <b>0.008376</b> | <b>-0.001121</b> | <b>-0.009497</b> | <b>0.87</b>                   | <b>0.001120</b> |
|            | <b>8</b>          | <b>0.006159</b> | <b>0.035287</b> | <b>5.449967</b> | <b>-0.006457</b> | <b>0.007639</b> | <b>-0.001182</b> | <b>-0.008822</b> | <b>0.85</b>                   | <b>0.001182</b> |
| <b>2c</b>  | <b>2</b>          | <b>0.009635</b> | <b>0.048242</b> | <b>5.082374</b> | <b>-0.010342</b> | <b>0.011201</b> | <b>-0.000859</b> | <b>-0.012060</b> | <b>0.92</b>                   | <b>0.000859</b> |
|            | <b>2</b>          | <b>0.002239</b> | <b>0.018480</b> | <b>6.022676</b> | <b>-0.002263</b> | <b>0.003442</b> | <b>-0.001178</b> | <b>-0.004620</b> | <b>0.66</b>                   | <b>0.001179</b> |
|            | <b>6</b>          | <b>0.004933</b> | <b>0.030634</b> | <b>5.513558</b> | <b>-0.005129</b> | <b>0.006394</b> | <b>-0.001265</b> | <b>-0.007658</b> | <b>0.80</b>                   | <b>0.001265</b> |
|            | 10                | 0.002668        | 0.020933        | 5.960644        | -0.002721        | 0.003977        | -0.001256        | -0.005233        | 0.68                          | 0.001256        |
|            | <b>10</b>         | <b>0.004643</b> | <b>0.029841</b> | <b>5.538080</b> | <b>-0.004925</b> | <b>0.006193</b> | <b>-0.001268</b> | <b>-0.007460</b> | <b>0.80</b>                   | <b>0.001268</b> |
|            | <b>10</b>         | <b>0.002333</b> | <b>0.019166</b> | <b>5.945746</b> | <b>-0.002452</b> | <b>0.003622</b> | <b>-0.001170</b> | <b>-0.004792</b> | <b>0.68</b>                   | <b>0.001170</b> |
|            | 10                | 0.000174        | 0.002723        | 7.238932        | -0.000178        | 0.000429        | -0.000251        | -0.000681        | 0.41                          | 0.000251        |
|            | 10                | 0.000174        | 0.002723        | 7.238940        | -0.000178        | 0.000429        | -0.000251        | -0.000681        | 0.41                          | 0.000251        |
|            | <b>10</b>         | <b>0.004643</b> | <b>0.029842</b> | <b>5.538070</b> | <b>-0.004925</b> | <b>0.006193</b> | <b>-0.001268</b> | <b>-0.007460</b> | <b>0.80</b>                   | <b>0.001268</b> |
|            | <b>10</b>         | <b>0.002333</b> | <b>0.019167</b> | <b>5.945734</b> | <b>-0.002452</b> | <b>0.003622</b> | <b>-0.001170</b> | <b>-0.004792</b> | <b>0.68</b>                   | <b>0.001170</b> |
|            | 10                | 0.002668        | 0.020933        | 5.960638        | -0.002721        | 0.003977        | -0.001256        | -0.005233        | 0.68                          | 0.001256        |
|            | <b>10</b>         | <b>0.000066</b> | <b>0.001201</b> | <b>7.730533</b> | <b>-0.000065</b> | <b>0.000183</b> | <b>-0.000118</b> | <b>-0.000300</b> | <b>0.36</b>                   | <b>0.000118</b> |

<sup>†</sup> The BCP properties of bonds that have corresponding in the experimental data are marked in bold. The additional BCPs found by AIMALL are not bold. <sup>‡</sup> Pair of molecules from Table S7.

**Table S9.** BCP Properties (in a.u.) of F...F Interactions in Compounds **3a-3c**.<sup>†</sup>

| Compound  | Pair <sup>‡</sup> | $\rho$          | $\nabla^2\rho$  | BPL             | V                | G               | K                | L                | $ V(\text{rb}) /G(\text{rb})$ | H               |
|-----------|-------------------|-----------------|-----------------|-----------------|------------------|-----------------|------------------|------------------|-------------------------------|-----------------|
| <b>3a</b> | <b>7</b>          | <b>0.006202</b> | <b>0.035157</b> | <b>5.493154</b> | <b>-0.006413</b> | <b>0.007601</b> | <b>-0.001188</b> | <b>-0.008789</b> | <b>0.84</b>                   | <b>0.001188</b> |
|           | 7                 | 0.006202        | 0.035157        | 5.493154        | -0.006413        | 0.007601        | -0.001188        | -0.008789        | 0.84                          | 0.001188        |
| <b>3b</b> | <b>6</b>          | <b>0.006859</b> | <b>0.038401</b> | <b>5.330646</b> | <b>-0.007340</b> | <b>0.008470</b> | <b>-0.001130</b> | <b>-0.009600</b> | <b>0.87</b>                   | <b>0.001130</b> |
|           | 6                 | 0.006859        | 0.038402        | 5.330632        | -0.007340        | 0.008470        | -0.001130        | -0.009600        | 0.87                          | 0.001130        |
|           | <b>12</b>         | <b>0.004774</b> | <b>0.030452</b> | <b>5.408429</b> | <b>-0.005210</b> | <b>0.006411</b> | <b>-0.001202</b> | <b>-0.007613</b> | <b>0.81</b>                   | <b>0.001201</b> |
|           | <b>13</b>         | <b>0.004822</b> | <b>0.030739</b> | <b>5.485000</b> | <b>-0.005134</b> | <b>0.006409</b> | <b>-0.001275</b> | <b>-0.007685</b> | <b>0.80</b>                   | <b>0.001275</b> |
|           | 13                | 0.004822        | 0.030739        | 5.485009        | -0.005134        | 0.006409        | -0.001275        | -0.007685        | 0.80                          | 0.001275        |
|           | 13                | 0.004772        | 0.030424        | 5.580564        | -0.004989        | 0.006298        | -0.001308        | -0.007606        | 0.79                          | 0.001309        |
| <b>3c</b> | 2                 | 0.003727        | 0.023819        | 5.923903        | -0.003445        | 0.004700        | -0.001255        | -0.005955        | 0.73                          | 0.001255        |
|           | <b>2</b>          | <b>0.007008</b> | <b>0.037643</b> | <b>5.433299</b> | <b>-0.007260</b> | <b>0.008335</b> | <b>-0.001076</b> | <b>-0.009411</b> | <b>0.87</b>                   | <b>0.001075</b> |
|           | 2                 | 0.003727        | 0.023818        | 5.923932        | -0.003444        | 0.004699        | -0.001255        | -0.005955        | 0.73                          | 0.001255        |

<sup>†</sup> The BCP properties of bonds that have corresponding in the experimental data are marked in bold. The additional BCPs found by AIMALL are not bold. <sup>‡</sup> Pair of molecules from Table S7.



## References

1. M. Olaru, J. Beckmann and C. I. Raț, *Organometallics*, 2014, **33**, 3012.
2. R. Uson, A. Laguna and M. Laguna, *Inorg. Synth.*, 1989, **26**, 85.
3. X.-F. Zhao and C. Zhang, *Synthesis*, 2007, 551.
4. S. Adimurthy, G. Ramachandraiah, P. K. Ghosh and A. V. Bedekar, *Tetrahedron Lett.*, 2003, **44**, 5099.
5. L. Emmanuvel, R. K. Shukla, A. Sudalai, S. Gurunath and S. Sivaram, *Tetrahedron Lett.*, 2006, **47**, 4793.
6. A. K. Al-Sa'ady, C. A. McAuliffe, R. V. Parish and J. A. Sandbank, *Inorg. Synth.*, 1985, **23**, 191.
7. E. A. Krasnokutskaya, N. I. Semenischeva, V. D. Filimonov and P. Knochel, *Synthesis*, 2007, 81.
8. M. P. Doyle, B. Siegfried and J. F. Dellaria Jr., *J. Org. Chem.*, 1977, **42**, 2426.
9. *Qual Browser Thermo Xcalibur*, Thermo Fischer Scientific Inc., Waltham, MA, 02454, 2011.
10. G. R. Fulmer, A. J. M. Miller, N. H. Sherden, H. E. Gottlieb, A. Nudelman, B. M. Stoltz, J. E. Bercaw and K. I. Goldberg, *Organometallics*, 2010, **29**, 2176.
11. *MestReNova*, Mestrelab Research S.L. Feliciano Barrera 9B, Bajo, 15706 Santiago de Compostela, Spain., 2015.
12. G. M. Sheldrick, *Acta Crystallogr., Sect. C: Struct. Chem.*, 2015, **71**, 3.
13. *DIAMOND-Visual Crystal Structure Information System*, Crystal Impact, Postfach 1251, D-53002 Bonn, Germany, 2015.
14. D. J. Gorin, B. D. Sherry and F. D. Toste, "Triphenylphosphinegold(I) chloride" in *Encyclopedia of Reagents for Organic Synthesis*, ed. L. A. Paquette, John Wiley & Sons, Hoboken NJ, 2001.
15. S. Kajigaeshi, T. Kakinami, H. Yamasaki, S. Fujisaki and T. Okamoto, *Bull. Chem. Soc. Jpn.*, 1988, **61**, 600.
16. S. M. Walter, S. H. Jungbauer, F. Kniep, S. Schindler, E. Herdtweck and S. M. Huber, *J. Fluorine Chem.*, 2013, **150**, 14.
17. S. C. Cohen, A. J. Tomlinson, M. R. Wiles and A. G. Massey, *J. Organomet. Chem.*, 1968, **11**, 385.
18. (a) A. Mele, G. Salani, F. Viani and P. Bravo, *Magn. Reson. Chem.*, 1997, **35**, 168; (b) K. Matsubara, A. Oba and Y. Usui, *Magn. Reson. Chem.*, 1998, **36**, 761; (c) J. Chen, J. Reibenspies, A. Derecskei-Kovacs and K. Burgess, *Chem. Commun.*, 1999, 2501.
19. I. D. Rae, A. Staffa, A. C. Diz, C. G. Girbet, M. C. Ruiz de Azúa and R. H. Contreras, *Aust. J. Chem.*, 1987, **40**, 1923.
20. M. J. Turner, J. J. McKinnon, S. K. Wolff, D. J. Grimwood, P. R. Spackman, D. Jayatilaka and M. A. Spackman, *CrystalExplorer* version 17.5, revision: f4e298a, University of Western Australia, 35 Stirling Hwy, Crawley WA 6009, Australia.
21. (a) D. Jayatilaka and D. J. Grimwood, "Tonto: A Fortran Based Object-Oriented System for Quantum Chemistry and Crystallography" in *Computational Science---ICCS 2003. Lecture Notes in Computer Science*, eds P. M. A. Sloot, D. Abramson, A. V. Bogdanov, Y. E. Gorbachev, J. J. Dongarra, A. Y. Zomaya, vol 2660. Springer, Berlin, Heidelberg, 2003. (b) D. Jayatilaka, D. Grimwood and P. Spackman, *tonto\_hpc* Python script, 2019, <https://github.com/peterspackman/crystalexplorer-scripts>.
22. Gaussian 09, Revision A.02, M. J. Frisch, G. W. Trucks, H. B. Schlegel, G. E. Scuseria, M. A. Robb, J. R. Cheeseman, G. Scalmani, V. Barone, G. A. Petersson, H. Nakatsuji, X. Li, M. Caricato, A. Marenich, J. Bloino, B. G. Janesko, R. Gomperts, B. Mennucci, H. P. Hratchian, J. V. Ortiz, A. F. Izmaylov, J. L. Sonnenberg, D. Williams-Young, F. Ding, F. Lipparini, F. Egidi, J. Goings, B. Peng, A. Petrone, T. Henderson, D. Ranasinghe, V. G. Zakrzewski, J. Gao, N. Rega, G. Zheng, W. Liang, M. Hada, M. Ehara, K. Toyota, R. Fukuda, J. Hasegawa, M. Ishida, T. Nakajima, Y. Honda, O. Kitao, H. Nakai, T. Vreven, K. Throssell, J. A. Montgomery, Jr., J. E. Peralta, F. Ogliaro, M. Bearpark, J. J. Heyd, E. Brothers, K. N. Kudin, V. N. Staroverov, T. Keith, R. Kobayashi, J. Normand, K. Raghavachari, A. Rendell, J. C. Burant, S. S. Iyengar, J. Tomasi, M. Cossi, J. M. Millam, M. Klene, C. Adamo, R. Cammi, J. W. Ochterski, R. L. Martin, K. Morokuma, O. Farkas, J. B. Foresman, and D. J. Fox, Gaussian, Inc., Wallingford CT, 2016.
23. (a) A. D. Becke, *J. Chem. Phys.* 1993, **98**, 5648; (b) C. Lee, W. Yang and R. G. Parr, *Phys. Rev. B* 1988, **37**, 785; (c) S. H. Vosko, L. Wilk and M. Nusair, *Can. J. Phys.* 1980, **58**, 1200; (d) P. J. Stephens, F. J. Devlin, C. F. Chabalowski and M. J. Frisch, *J. Phys. Chem.*, 1994, **98**, 11623.
24. (a) R. Ditchfield, W. J. Hehre and J. A. Pople, *J. Chem. Phys.* 1971, **54**, 724; (b) W. J. Hehre, R. Ditchfield and J. A. Pople, *J. Chem. Phys.* 1972, **56**, 2257; (c) P. C. Hariharan and J. A. Pople, *Mol. Phys.*, 1974, **27**, 209; (d) M. S. Gordon, *Chem. Phys. Lett.*, 1980; **76**, 163; (e) P. C. Hariharan and J. A. Pople, *Theo. Chim. Acta*, 1973, **28**, 213.
25. (a) P. J. Hay and W. R. Wadt, *J. Chem. Phys.*, 1985, **82**, 270; (b) W. R. Wadt and P. J. Hay, *J. Chem. Phys.*, 1985, **82** 284; (c) P. J. Hay and W. R. Wadt, *J. Chem. Phys.*, 1985, **82**, 299.
26. S. Grimme, S. Ehrlich and L. Goerigk, *J. Comp. Chem.*, 2011, **32**, 1456.

27. Y. Zhao and D. G. Truhlar, *Theor. Chem. Acc.*, 2008, **120**, 215.
28. (a) F. Weigend and R. Ahlrichs, *Phys. Chem. Chem. Phys.*, 2005, **7**, 3297; (b) F. Weigend, *Phys. Chem. Chem. Phys.*, 2006, **8**, 1057.
29. S. Grimme, J. Antony, S. Ehrlich and H. Krieg, *J. Chem. Phys.*, 2010, **132**, 154104.
30. Keith A. Todd, AIMAll Version 19.10.12, TK Gristmill Software, Overland Park KS, USA, 2019.

## Single point calculations compact archive entries

### Compound 2a

```
1\1\GINC-COMPUTE041\SP\RB3LYP\Gen\C74H40Au2F20P2\CRAT\17-Sep-2020\0\#\#
p b3lyp/gen pseudo=read counterpoise=2 empiricaldispersion=gd3bj nosym
m gfpint\CystalExplorer Job symop = -x, -y, -z, r = 12.3615\0,1\F,
0,1.231243,8.719167,2.882921\C,0,2.52756,8.665544,2.511054\C,0,3.48538
8,8.881094,3.459888\C,0,2.826444,8.357024,1.190355\C,0,3.152502,9.1509
11,4.912849\C,0,4.811507,8.821339,3.005598\F,0,1.868312,8.151542,0.300
943\C,0,4.126244,8.350523,0.795487\C,0,3.330222,8.109827,5.842515\C,0,
2.705016,10.42122,5.275131\F,0,5.806449,9.026751,3.854756\C,0,5.098701
,8.572584,1.679148\F,0,4.417113,8.088404,-0.49071\Au,0,4.107889,6.3102
17,5.224526\C,0,3.012221,8.428408,7.167048\C,0,2.408583,10.708395,6.59
3914\H,0,2.588373,11.187275,4.518556\F,0,6.397193,8.53266,1.301531\P,0
,5.041866,4.392788,4.387828\C,0,2.555685,9.690279,7.538914\C,0,3.21744
3,7.412128,8.246226\C,0,1.966301,12.098473,7.0022\C,0,6.806679,4.61921
2,4.008103\C,0,4.295743,3.943177,2.790912\C,0,4.903099,2.917195,5.4399
79\H,0,2.310526,9.884323,8.575729\C,0,4.103024,7.638809,9.287067\C,0,2
.55738,6.188859,8.280729\H,0,1.012866,12.039183,7.512461\H,0,1.866064,
12.718294,6.119689\H,0,2.704546,12.532062,7.665424\C,0,7.522515,5.6006
57,4.655993\C,0,7.460616,3.835062,3.055436\C,0,4.310748,4.871634,1.771
156\C,0,3.619419,2.771929,2.549391\C,0,3.938395,2.90401,6.409897\C,0,5
.707828,1.801023,5.280881\F,0,4.803569,8.788987,9.346489\C,0,4.299752,
6.73547,10.324076\F,0,1.638003,5.906563,7.343397\C,0,2.741114,5.284722
,9.279401\H,0,7.027888,6.238653,5.377873\C,0,8.869868,5.778597,4.38955
3\C,0,8.793709,4.029285,2.796663\H,0,6.912505,3.070448,2.518914\H,0,4.
8244,5.812441,1.926036\C,0,3.698516,4.642023,0.571217\C,0,3.01485,2.54
8139,1.334117\H,0,3.561776,2.017936,3.324751\H,0,3.276315,3.753978,6.5
19924\C,0,3.803217,1.824693,7.245638\C,0,5.553445,0.726769,6.110871\H,
0,6.4588,1.780639,4.50073\F,0,5.162245,7.01112,11.301662\C,0,3.614547,
5.557004,10.316408\F,0,2.057639,4.114397,9.275567\H,0,9.422357,6.54462
9,4.919558\C,0,9.507808,5.00845,3.473306\H,0,9.29285,3.413885,2.05849\
H,0,3.730402,5.39822,-0.203376\C,0,3.052461,3.476237,0.343114\H,0,2.49
9197,1.611411,1.162177\C,0,4.594646,0.76627,7.103792\H,0,3.048688,1.83
4679,8.02234\H,0,6.178256,-0.149595,5.990494\F,0,3.785602,4.670933,11.
297828\H,0,10.562034,5.155231,3.273763\H,0,2.573857,3.286135,-0.609553
\H,0,4.485969,-0.075011,7.777176\F,0,0.227134,1.445355,-0.300943\C,0,-
0.730999,1.239873,-1.190355\C,0,-0.432115,0.931353,-2.511054\C,0,-2.03
0799,1.246374,-0.795486\F,0,0.864202,0.877731,-2.88292\C,0,-1.389943,0
.715804,-3.459887\F,0,-2.321668,1.508494,0.49071\C,0,-3.003256,1.02431
3,-1.679148\C,0,-1.057057,0.445986,-4.912848\C,0,-2.716062,0.775558,-3
.005597\F,0,-4.301749,1.064236,-1.301531\C,0,-1.234776,1.48707,-5.8425
14\C,0,-0.609571,-0.824323,-5.275131\F,0,-3.711004,0.570147,-3.854756\
Au,0,-2.012444,3.286679,-5.224526\C,0,-0.916776,1.16849,-7.167048\C,0,
-0.313138,-1.111498,-6.593914\H,0,-0.492928,-1.590377,-4.518556\P,0,-2
.946421,5.204109,-4.387828\C,0,-0.46024,-0.093382,-7.538914\C,0,-1.121
998,2.184768,-8.246225\C,0,0.129144,-2.501575,-7.0022\C,0,-2.200298,5.
65372,-2.790913\C,0,-4.711234,4.977685,-4.008103\C,0,-2.807654,6.67970
2,-5.439979\H,0,-0.215081,-0.287426,-8.57573\C,0,-2.007578,1.958088,-9
.287067\C,0,-0.461935,3.408038,-8.280728\H,0,-0.6091,-2.935165,-7.6654
25\H,0,1.082579,-2.442286,-7.512461\H,0,0.229381,-3.121397,-6.119689\C
,0,-1.523974,6.824969,-2.549392\C,0,-2.215303,4.725263,-1.771156\C,0,-
```

5.42707,3.996241,-4.655993\C,0,-5.365171,5.761835,-3.055435\C,0,-1.842  
95,6.692887,-6.409897\C,0,-3.612383,7.795874,-5.280881\F,0,-2.708124,0  
.807909,-9.34649\C,0,-2.204307,2.861427,-10.324076\F,0,0.457442,3.6903  
34,-7.343396\C,0,-0.645669,4.312175,-9.2794\C,0,-0.919404,7.048758,-1.  
334117\H,0,-1.466331,7.578962,-3.324751\C,0,-1.603071,4.954875,-0.5712  
17\H,0,-2.728955,3.784456,-1.926037\H,0,-4.932443,3.358243,-5.377874\C  
,0,-6.774423,3.818301,-4.389553\C,0,-6.698264,5.567613,-2.796663\H,0,-  
4.81706,6.526449,-2.518914\H,0,-1.18087,5.842919,-6.519924\C,0,-1.7077  
72,7.772204,-7.245638\C,0,-3.458,8.870129,-6.110871\H,0,-4.363355,7.81  
6258,-4.500729\F,0,-3.0668,2.585777,-11.301661\C,0,-1.519102,4.039894,  
-10.316408\F,0,0.037806,5.482501,-9.275567\C,0,-0.957016,6.12066,-0.34  
3113\H,0,-0.403752,7.985486,-1.162178\H,0,-1.634957,4.198678,0.203376\  
H,0,-7.326911,3.052268,-4.919558\C,0,-7.412362,4.588448,-3.473306\H,0,  
-7.197404,6.183013,-2.058489\H,0,-0.953243,7.762218,-8.022339\C,0,-2.4  
99201,8.830626,-7.103792\H,0,-4.08281,9.746492,-5.990495\F,0,-1.690156  
,4.925964,-11.297828\H,0,-0.478412,6.310762,0.609554\H,0,-8.466589,4.4  
41666,-3.273763\H,0,-2.390524,9.671907,-7.777176\\Version=ES64L-G09Rev  
E.01\HF=-2897.2884012\RMSD=4.898e-09\Dipole=0.0000024,0.000001,-0.0000  
008\Quadrupole=26.5878173,18.0654228,-44.6532401,-28.0414991,-0.456555  
9,-22.3268922\PG=C01 [X(C74H40Au2F20P2)]\@

1\1\GINC-COMPUTE021\SP\RB3LYP\Gen\C74H40Au2F20P2\CRAT\17-Sep-2020\0\#\#  
p b3lyp/gen pseudo=read counterpoise=2 empiricaldispersion=gd3bj nosym  
m gfpint\\CrystalExplorer Job symop = -x, -y, -z, r = 10.8969\\0,1\F,  
0,1.231243,8.719167,2.882921\C,0,2.52756,8.665544,2.511054\C,0,3.48538  
8,8.881094,3.459888\C,0,2.826444,8.357024,1.190355\C,0,3.152502,9.1509  
11,4.912849\C,0,4.811507,8.821339,3.005598\F,0,1.868312,8.151542,0.300  
943\C,0,4.126244,8.350523,0.795487\C,0,3.330222,8.109827,5.842515\C,0,  
2.705016,10.42122,5.275131\F,0,5.806449,9.026751,3.854756\C,0,5.098701  
,8.572584,1.679148\F,0,4.417113,8.088404,-0.49071\Au,0,4.107889,6.3102  
17,5.224526\C,0,3.012221,8.428408,7.167048\C,0,2.408583,10.708395,6.59  
3914\H,0,2.588373,11.187275,4.518556\F,0,6.397193,8.53266,1.301531\P,0  
,5.041866,4.392788,4.387828\C,0,2.555685,9.690279,7.538914\C,0,3.21744  
3,7.412128,8.246226\C,0,1.966301,12.098473,7.0022\C,0,6.806679,4.61921  
2,4.008103\C,0,4.295743,3.943177,2.790912\C,0,4.903099,2.917195,5.4399  
79\H,0,2.310526,9.884323,8.575729\C,0,4.103024,7.638809,9.287067\C,0,2  
.55738,6.188859,8.280729\H,0,1.012866,12.039183,7.512461\H,0,1.866064,  
12.718294,6.119689\H,0,2.704546,12.532062,7.665424\C,0,7.522515,5.6006  
57,4.655993\C,0,7.460616,3.835062,3.055436\C,0,4.310748,4.871634,1.771  
156\C,0,3.619419,2.771929,2.549391\C,0,3.938395,2.90401,6.409897\C,0,5  
.707828,1.801023,5.280881\F,0,4.803569,8.788987,9.346489\C,0,4.299752,  
6.73547,10.324076\F,0,1.638003,5.906563,7.343397\C,0,2.741114,5.284722  
,9.279401\H,0,7.027888,6.238653,5.377873\C,0,8.869868,5.778597,4.38955  
3\C,0,8.793709,4.029285,2.796663\H,0,6.912505,3.070448,2.518914\H,0,4.  
8244,5.812441,1.926036\C,0,3.698516,4.642023,0.571217\C,0,3.01485,2.54  
8139,1.334117\H,0,3.561776,2.017936,3.324751\H,0,3.276315,3.753978,6.5  
19924\C,0,3.803217,1.824693,7.245638\C,0,5.553445,0.726769,6.110871\H,  
0,6.4588,1.780639,4.50073\F,0,5.162245,7.01112,11.301662\C,0,3.614547,  
5.557004,10.316408\F,0,2.057639,4.114397,9.275567\H,0,9.422357,6.54462  
9,4.919558\C,0,9.507808,5.00845,3.473306\H,0,9.29285,3.413885,2.05849\  
H,0,3.730402,5.39822,-0.203376\C,0,3.052461,3.476237,0.343114\H,0,2.49  
9197,1.611411,1.162177\C,0,4.594646,0.76627,7.103792\H,0,3.048688,1.83  
4679,8.02234\H,0,6.178256,-0.149595,5.990494\F,0,3.785602,4.670933,11.

297828\H,0,10.562034,5.155231,3.273763\H,0,2.573857,3.286135,-0.609553  
\H,0,4.485969,-0.075011,7.777176\H,0,0.394411,4.441666,-3.273763\C,0,1  
.448638,4.588448,-3.473306\C,0,2.162736,5.567613,-2.796663\C,0,2.08657  
7,3.818301,-4.389553\H,0,1.663596,6.183013,-2.058489\C,0,3.495829,5.76  
1835,-3.055435\C,0,3.433931,3.996241,-4.655993\H,0,1.534088,3.052268,-  
4.919558\H,0,4.04394,6.526449,-2.518914\C,0,4.149766,4.977685,-4.00810  
3\H,0,3.928557,3.358243,-5.377874\P,0,5.914579,5.204109,-4.387828\C,0,  
6.660703,5.65372,-2.790913\Au,0,6.848556,3.286679,-5.224526\C,0,6.0533  
46,6.679702,-5.439979\C,0,6.645697,4.725263,-1.771156\C,0,7.337026,6.8  
24969,-2.549392\C,0,7.626224,1.48707,-5.842514\C,0,7.01805,6.692887,-6  
.409897\C,0,5.248617,7.795874,-5.280881\H,0,6.132045,3.784456,-1.92603  
7\C,0,7.257929,4.954875,-0.571217\C,0,7.941596,7.048758,-1.334117\H,0,  
7.394669,7.578962,-3.324751\C,0,7.803943,0.445986,-4.912848\C,0,7.9442  
24,1.16849,-7.167048\H,0,7.68013,5.842919,-6.519924\C,0,7.153228,7.772  
204,-7.245638\C,0,5.403,8.870129,-6.110871\H,0,4.497645,7.816258,-4.50  
0729\C,0,7.903984,6.12066,-0.343113\H,0,7.226043,4.198678,0.203376\H,0  
,8.457249,7.985486,-1.162178\C,0,7.471057,0.715804,-3.459887\C,0,8.251  
43,-0.824323,-5.275131\C,0,8.40076,-0.093382,-7.538914\C,0,7.739002,2.  
184768,-8.246225\H,0,7.907757,7.762218,-8.022339\C,0,6.361799,8.830626  
,-7.103792\H,0,4.77819,9.746492,-5.990495\H,0,8.382588,6.310762,0.6095  
54\C,0,6.144938,0.775558,-3.005597\C,0,8.428885,0.931353,-2.511054\C,0  
,8.547862,-1.111498,-6.593914\H,0,8.368073,-1.590377,-4.518556\H,0,8.6  
4592,-0.287426,-8.57573\C,0,6.853422,1.958088,-9.287067\C,0,8.399065,3  
.408038,-8.280728\H,0,6.470476,9.671907,-7.777176\C,0,5.857744,1.02431  
3,-1.679148\F,0,5.149996,0.570147,-3.854756\C,0,8.130001,1.239873,-1.1  
90355\F,0,9.725203,0.877731,-2.88292\C,0,8.990144,-2.501575,-7.0022\F,  
0,6.152876,0.807909,-9.34649\C,0,6.656693,2.861427,-10.324076\F,0,9.31  
8442,3.690334,-7.343396\C,0,8.215331,4.312175,-9.2794\F,0,4.559251,1.0  
64236,-1.301531\C,0,6.830201,1.246374,-0.795486\F,0,9.088134,1.445355,  
-0.300943\H,0,8.2519,-2.935165,-7.665425\H,0,9.943579,-2.442286,-7.512  
461\H,0,9.090382,-3.121397,-6.119689\F,0,5.7942,2.585777,-11.301661\C,  
0,7.341898,4.039894,-10.316408\F,0,8.898806,5.482501,-9.275567\F,0,6.5  
39331,1.508494,0.49071\F,0,7.170844,4.925964,-11.297828\\Version=ES64L  
-G09RevE.01\HF=-2897.2883819\RMSD=4.898e-09\Dipole=0.0000006,0.0000014  
,-0.0000006\Quadrupole=3.9286764,29.0140547,-32.9427311,-0.1255647,11.  
7617126,-22.3072388\PG=C01 [X(C74H40Au2F20P2)]\@

1\1\GINC-COMPUTE021\SP\RB3LYP\Gen\C74H40Au2F20P2\CRAT\17-Sep-2020\0\#\#  
p b3lyp/gen pseudo=read counterpoise=2 empiricaldispersion=gd3bj nosym  
m gfpriint\CrystalExplorer Job symop = -x, -y, -z, r = 10.8584\0,1\F,  
0,1.231243,8.719167,2.882921\C,0,2.52756,8.665544,2.511054\C,0,3.48538  
8,8.881094,3.459888\C,0,2.826444,8.357024,1.190355\C,0,3.152502,9.1509  
11,4.912849\C,0,4.811507,8.821339,3.005598\F,0,1.868312,8.151542,0.300  
943\C,0,4.126244,8.350523,0.795487\C,0,3.330222,8.109827,5.842515\C,0,  
2.705016,10.42122,5.275131\F,0,5.806449,9.026751,3.854756\C,0,5.098701  
,8.572584,1.679148\F,0,4.417113,8.088404,-0.49071\Au,0,4.107889,6.3102  
17,5.224526\C,0,3.012221,8.428408,7.167048\C,0,2.408583,10.708395,6.59  
3914\H,0,2.588373,11.187275,4.518556\F,0,6.397193,8.53266,1.301531\P,0  
,5.041866,4.392788,4.387828\C,0,2.555685,9.690279,7.538914\C,0,3.21744  
3,7.412128,8.246226\C,0,1.966301,12.098473,7.0022\C,0,6.806679,4.61921  
2,4.008103\C,0,4.295743,3.943177,2.790912\C,0,4.903099,2.917195,5.4399  
79\H,0,2.310526,9.884323,8.575729\C,0,4.103024,7.638809,9.287067\C,0,2  
.55738,6.188859,8.280729\H,0,1.012866,12.039183,7.512461\H,0,1.866064,

12.718294,6.119689\H,0,2.704546,12.532062,7.665424\C,0,7.522515,5.6006  
57,4.655993\C,0,7.460616,3.835062,3.055436\C,0,4.310748,4.871634,1.771  
156\C,0,3.619419,2.771929,2.549391\C,0,3.938395,2.90401,6.409897\C,0,5  
.707828,1.801023,5.280881\F,0,4.803569,8.788987,9.346489\C,0,4.299752,  
6.73547,10.324076\F,0,1.638003,5.906563,7.343397\C,0,2.741114,5.284722  
,9.279401\H,0,7.027888,6.238653,5.377873\C,0,8.869868,5.778597,4.38955  
3\C,0,8.793709,4.029285,2.796663\H,0,6.912505,3.070448,2.518914\H,0,4.  
8244,5.812441,1.926036\C,0,3.698516,4.642023,0.571217\C,0,3.01485,2.54  
8139,1.334117\H,0,3.561776,2.017936,3.324751\H,0,3.276315,3.753978,6.5  
19924\C,0,3.803217,1.824693,7.245638\C,0,5.553445,0.726769,6.110871\H,  
0,6.4588,1.780639,4.50073\F,0,5.162245,7.01112,11.301662\C,0,3.614547,  
5.557004,10.316408\F,0,2.057639,4.114397,9.275567\H,0,9.422357,6.54462  
9,4.919558\C,0,9.507808,5.00845,3.473306\H,0,9.29285,3.413885,2.05849\  
H,0,3.730402,5.39822,-0.203376\C,0,3.052461,3.476237,0.343114\H,0,2.49  
9197,1.611411,1.162177\C,0,4.594646,0.76627,7.103792\H,0,3.048688,1.83  
4679,8.02234\H,0,6.178256,-0.149595,5.990494\F,0,3.785602,4.670933,11.  
297828\H,0,10.562034,5.155231,3.273763\H,0,2.573857,3.286135,-0.609553  
\H,0,4.485969,-0.075011,7.777176\F,0,-1.419535,7.244799,7.870526\C,0,-  
1.24848,6.358728,8.851946\C,0,-0.375048,6.63101,9.888954\C,0,-1.933686  
,5.180261,8.844278\F,0,0.308427,7.801335,9.892787\C,0,-0.191314,5.7268  
72,10.887626\C,0,-1.736957,4.276923,9.881287\F,0,-2.796178,4.904612,7.  
866693\F,0,0.728064,6.009169,11.824958\C,0,-0.851376,4.503603,10.92212  
9\F,0,-2.437502,3.126744,9.821864\C,0,-0.646154,3.487324,12.001307\C,0  
, -0.189619,2.225452,11.62944\C,0,-0.964155,3.805905,13.32584\H,0,0.055  
541,2.031409,10.592624\C,0,-0.042516,1.207337,12.574441\Au,0,-1.741822  
,5.605514,13.943828\C,0,-0.786435,2.764821,14.255506\C,0,-0.338949,1.4  
94512,13.893223\C,0,0.399765,-0.182741,12.166154\p,0,-2.6758,7.522944,  
14.780525\C,0,-1.119321,3.034638,15.708467\H,0,-0.222306,0.728457,14.6  
49798\H,0,-0.338479,-0.61633,11.502929\H,0,1.3532,-0.123451,11.655893\  
H,0,0.500003,-0.802563,13.048665\C,0,-4.440612,7.29652,15.160251\C,0,-  
1.929676,7.972555,16.377441\C,0,-2.537033,8.998537,13.728375\C,0,-2.44  
5441,3.094393,16.162756\C,0,-0.161494,3.250188,16.657299\C,0,-5.156448  
,6.315076,14.512361\C,0,-5.09455,8.08067,16.112919\C,0,-1.944681,7.044  
097,17.397198\C,0,-1.253352,9.143804,16.618963\C,0,-1.572329,9.011722,  
12.758456\C,0,-3.341761,10.114709,13.887472\F,0,-3.440383,2.888982,15.  
313599\C,0,-2.732634,3.343148,17.489206\F,0,1.134824,3.196566,16.28543  
5\C,0,-0.460378,3.558708,17.977999\H,0,-4.661821,5.677078,13.790481\C,  
0,-6.503802,6.137136,14.778802\C,0,-6.427642,7.886447,16.371691\H,0,-4  
.546439,8.845284,16.649441\H,0,-2.458333,6.103291,17.242317\C,0,-1.332  
449,7.273709,18.597137\C,0,-0.648783,9.367593,17.834236\H,0,-1.19571,9  
.897797,15.843603\H,0,-0.910249,8.161755,12.648431\C,0,-1.43715,10.091  
039,11.922716\C,0,-3.187379,11.188963,13.057484\H,0,-4.092733,10.13509  
4,14.667624\F,0,-4.031127,3.383071,17.866823\C,0,-1.760177,3.565209,18  
.372868\F,0,0.497755,3.76419,18.867411\H,0,-7.05629,5.371102,14.248796  
\C,0,-7.141741,6.907282,15.695047\H,0,-6.926783,8.501847,17.109865\H,0  
, -1.364335,6.517512,19.371731\C,0,-0.686395,8.439495,18.825241\H,0,-0.  
13313,10.30432,18.006176\H,0,-0.682621,10.081053,11.146015\C,0,-2.2285  
79,11.149462,12.064562\H,0,-3.812189,12.065327,13.177859\F,0,-2.051047  
,3.827328,19.659063\H,0,-8.195968,6.760501,15.89459\H,0,-0.207791,8.62  
9598,19.777908\H,0,-2.119903,11.990743,11.391177\\Version=ES64L-G09Rev  
E.01\HF=-2897.288385\RMSD=4.898e-09\Dipole=-0.0000029,-0.0000011,-0.00  
00046\Quadrupole=3.8646888,10.3257813,-14.19047,-31.339282,-33.6086859  
,41.2889797\PG=C01 [X(C74H40Au2F20P2)]\@\@

1\1\GINC-COMPUTE021\SP\RB3LYP\Gen\C74H40Au2F20P2\CRAT\17-Sep-2020\0\#\#  
p b3lyp/gen pseudo=read counterpoise=2 empiricaldispersion=gd3bj nosym  
m gfpint\CystalExplorer Job symop = x, y, z, r = 8.861\0,1\F,0,1.2  
31243,8.719167,2.882921\C,0,2.52756,8.665544,2.511054\C,0,3.485388,8.8  
81094,3.459888\C,0,2.826444,8.357024,1.190355\C,0,3.152502,9.150911,4.  
912849\C,0,4.811507,8.821339,3.005598\F,0,1.868312,8.151542,0.300943\C  
,0,4.126244,8.350523,0.795487\C,0,3.330222,8.109827,5.842515\C,0,2.705  
016,10.42122,5.275131\F,0,5.806449,9.026751,3.854756\C,0,5.098701,8.57  
2584,1.679148\F,0,4.417113,8.088404,-0.49071\Au,0,4.107889,6.310217,5.  
224526\C,0,3.012221,8.428408,7.167048\C,0,2.408583,10.708395,6.593914\  
H,0,2.588373,11.187275,4.518556\F,0,6.397193,8.53266,1.301531\P,0,5.04  
1866,4.392788,4.387828\C,0,2.555685,9.690279,7.538914\C,0,3.217443,7.4  
12128,8.246226\C,0,1.966301,12.098473,7.0022\C,0,6.806679,4.619212,4.0  
08103\C,0,4.295743,3.943177,2.790912\C,0,4.903099,2.917195,5.439979\  
H,0,2.310526,9.884323,8.575729\C,0,4.103024,7.638809,9.287067\C,0,2.5573  
8,6.188859,8.280729\H,0,1.012866,12.039183,7.512461\H,0,1.866064,12.71  
8294,6.119689\H,0,2.704546,12.532062,7.665424\C,0,7.522515,5.600657,4.  
655993\C,0,7.460616,3.835062,3.055436\C,0,4.310748,4.871634,1.771156\C  
,0,3.619419,2.771929,2.549391\C,0,3.938395,2.90401,6.409897\C,0,5.7078  
28,1.801023,5.280881\F,0,4.803569,8.788987,9.346489\C,0,4.299752,6.735  
47,10.324076\F,0,1.638003,5.906563,7.343397\C,0,2.741114,5.284722,9.27  
9401\H,0,7.027888,6.238653,5.377873\C,0,8.869868,5.778597,4.389553\C,0  
,8.793709,4.029285,2.796663\H,0,6.912505,3.070448,2.518914\H,0,4.8244,  
5.812441,1.926036\C,0,3.698516,4.642023,0.571217\C,0,3.01485,2.548139,  
1.334117\H,0,3.561776,2.017936,3.324751\H,0,3.276315,3.753978,6.519924  
\C,0,3.803217,1.824693,7.245638\C,0,5.553445,0.726769,6.110871\H,0,6.4  
588,1.780639,4.50073\F,0,5.162245,7.01112,11.301662\C,0,3.614547,5.557  
004,10.316408\F,0,2.057639,4.114397,9.275567\H,0,9.422357,6.544629,4.9  
19558\C,0,9.507808,5.00845,3.473306\H,0,9.29285,3.413885,2.05849\H,0,3  
.730402,5.39822,-0.203376\C,0,3.052461,3.476237,0.343114\H,0,2.499197,  
1.611411,1.162177\C,0,4.594646,0.76627,7.103792\H,0,3.048688,1.834679,  
8.02234\H,0,6.178256,-0.149595,5.990494\F,0,3.785602,4.670933,11.29782  
8\H,0,10.562034,5.155231,3.273763\H,0,2.573857,3.286135,-0.609553\H,0,  
4.485969,-0.075011,7.777176\C,0,0.008869,5.778597,4.389553\H,0,0.56135  
7,6.544629,4.919558\C,0,-1.338485,5.600657,4.655993\C,0,0.646807,5.008  
45,3.473306\C,0,-2.054321,4.619212,4.008103\H,0,-1.833112,6.238653,5.3  
77873\C,0,-0.067291,4.029285,2.796663\H,0,1.701034,5.155231,3.273763\C  
,0,-1.400384,3.835062,3.055436\P,0,-3.819134,4.392788,4.387828\H,0,0.4  
3185,3.413885,2.05849\H,0,-1.948495,3.070448,2.518914\Au,0,-4.753111,6  
.310217,5.224526\C,0,-4.565258,3.943177,2.790912\C,0,-3.957901,2.91719  
5,5.439979\C,0,-5.530778,8.109827,5.842515\C,0,-4.550252,4.871634,1.77  
1156\C,0,-5.241581,2.771929,2.549391\C,0,-4.922605,2.90401,6.409897\C,  
0,-3.153172,1.801023,5.280881\C,0,-5.848779,8.428408,7.167048\C,0,-5.7  
08498,9.150911,4.912849\H,0,-4.0366,5.812441,1.926036\C,0,-5.162484,4.  
642023,0.571217\C,0,-5.84615,2.548139,1.334117\H,0,-5.299224,2.017936,  
3.324751\H,0,-5.584685,3.753978,6.519924\C,0,-5.057783,1.824693,7.2456  
38\C,0,-3.307555,0.726769,6.110871\H,0,-2.4022,1.780639,4.50073\C,0,-6  
.305315,9.690279,7.538914\C,0,-5.643557,7.412128,8.246226\C,0,-6.15598  
4,10.42122,5.275131\C,0,-5.375612,8.881094,3.459888\H,0,-5.130598,5.39  
822,-0.203376\C,0,-5.808539,3.476237,0.343114\H,0,-6.361804,1.611411,1  
.162177\H,0,-5.812312,1.834679,8.02234\C,0,-4.266354,0.76627,7.103792\  
H,0,-2.682745,-0.149595,5.990494\H,0,-6.550474,9.884323,8.575729\C,0,-

6.452417,10.708395,6.593914\C,0,-4.757977,7.638809,9.287067\C,0,-6.303  
62,6.188859,8.280729\H,0,-6.272627,11.187275,4.518556\C,0,-4.049493,8.  
821339,3.005598\C,0,-6.33344,8.665544,2.511054\H,0,-6.287143,3.286135,  
-0.609553\H,0,-4.375031,-0.075011,7.777176\C,0,-6.894699,12.098473,7.0  
022\F,0,-4.057431,8.788987,9.346489\C,0,-4.561248,6.73547,10.324076\F,  
0,-7.222997,5.906563,7.343397\C,0,-6.119885,5.284722,9.279401\F,0,-3.0  
54551,9.026751,3.854756\C,0,-3.7623,8.572584,1.679148\F,0,-7.629757,8.  
719167,2.882921\C,0,-6.034556,8.357024,1.190355\H,0,-6.156454,12.53206  
2,7.665424\H,0,-7.848134,12.039183,7.512461\H,0,-6.994936,12.718294,6.  
119689\F,0,-3.698755,7.01112,11.301662\C,0,-5.246453,5.557004,10.31640  
8\F,0,-6.803361,4.114397,9.275567\F,0,-2.463807,8.53266,1.301531\C,0,-  
4.734756,8.350523,0.795487\F,0,-6.992689,8.151542,0.300943\F,0,-5.0753  
98,4.670933,11.297828\F,0,-4.443887,8.088404,-0.49071\\Version=ES64L-G  
09RevE.01\HF=-2897.2883909\RMSD=4.898e-09\Dipole=2.379852,-3.0015388,-  
1.336353\Quadrupole=25.9243072,-9.7621618,-16.1621454,15.2552118,13.19  
22249,-31.4169559\PG=C01 [X(C74H40Au2F20P2)]\@

1\1\GINC-COMPUTE021\SP\RB3LYP\Gen\C74H40Au2F20P2\CRAT\17-Sep-2020\0\#\#  
p b3lyp/gen pseudo=read counterpoise=2 empiricaldispersion=gd3bj nosym  
m gfpriint\CystalExplorer Job symop = x, y, z, r = 11.7419\0,1\F,0,1  
.231243,8.719167,2.882921\C,0,2.52756,8.665544,2.511054\C,0,3.485388,8  
.881094,3.459888\C,0,2.826444,8.357024,1.190355\C,0,3.152502,9.150911,  
4.912849\C,0,4.811507,8.821339,3.005598\F,0,1.868312,8.151542,0.300943  
\C,0,4.126244,8.350523,0.795487\C,0,3.330222,8.109827,5.842515\C,0,2.7  
05016,10.42122,5.275131\F,0,5.806449,9.026751,3.854756\C,0,5.098701,8.  
572584,1.679148\F,0,4.417113,8.088404,-0.49071\Au,0,4.107889,6.310217,  
5.224526\C,0,3.012221,8.428408,7.167048\C,0,2.408583,10.708395,6.59391  
4\H,0,2.588373,11.187275,4.518556\F,0,6.397193,8.53266,1.301531\P,0,5.  
041866,4.392788,4.387828\C,0,2.555685,9.690279,7.538914\C,0,3.217443,7  
.412128,8.246226\C,0,1.966301,12.098473,7.0022\C,0,6.806679,4.619212,4  
.008103\C,0,4.295743,3.943177,2.790912\C,0,4.903099,2.917195,5.439979\  
H,0,2.310526,9.884323,8.575729\C,0,4.103024,7.638809,9.287067\C,0,2.55  
738,6.188859,8.280729\H,0,1.012866,12.039183,7.512461\H,0,1.866064,12.  
718294,6.119689\H,0,2.704546,12.532062,7.665424\C,0,7.522515,5.600657,  
4.655993\C,0,7.460616,3.835062,3.055436\C,0,4.310748,4.871634,1.771156  
\C,0,3.619419,2.771929,2.549391\C,0,3.938395,2.90401,6.409897\C,0,5.70  
7828,1.801023,5.280881\F,0,4.803569,8.788987,9.346489\C,0,4.299752,6.7  
3547,10.324076\F,0,1.638003,5.906563,7.343397\C,0,2.741114,5.284722,9.  
279401\H,0,7.027888,6.238653,5.377873\C,0,8.869868,5.778597,4.389553\C  
,0,8.793709,4.029285,2.796663\H,0,6.912505,3.070448,2.518914\H,0,4.824  
4,5.812441,1.926036\C,0,3.698516,4.642023,0.571217\C,0,3.01485,2.54813  
9,1.334117\H,0,3.561776,2.017936,3.324751\H,0,3.276315,3.753978,6.5199  
24\C,0,3.803217,1.824693,7.245638\C,0,5.553445,0.726769,6.110871\H,0,6  
.4588,1.780639,4.50073\F,0,5.162245,7.01112,11.301662\C,0,3.614547,5.5  
57004,10.316408\F,0,2.057639,4.114397,9.275567\H,0,9.422357,6.544629,4  
.919558\C,0,9.507808,5.00845,3.473306\H,0,9.29285,3.413885,2.05849\H,0  
,3.730402,5.39822,-0.203376\C,0,3.052461,3.476237,0.343114\H,0,2.49919  
7,1.611411,1.162177\C,0,4.594646,0.76627,7.103792\H,0,3.048688,1.83467  
9,8.02234\H,0,6.178256,-0.149595,5.990494\F,0,3.785602,4.670933,11.297  
828\H,0,10.562034,5.155231,3.273763\H,0,2.573857,3.286135,-0.609553\H,  
0,4.485969,-0.075011,7.777176\C,0,-2.170909,10.363168,7.103792\C,0,-1.  
21211,10.323666,6.110871\C,0,-2.962337,11.42159,7.245638\H,0,-2.279586  
,9.521887,7.777176\H,0,-0.587299,9.447302,5.990494\C,0,-1.057727,11.39



7921,5.280881\C,0,-2.82716,12.500907,6.409897\H,0,-3.716867,11.431577,  
8.02234\C,0,-1.862456,12.514092,5.439979\H,0,-0.306755,11.377536,4.500  
73\H,0,-3.489239,13.350875,6.519924\p,0,-1.723689,13.989685,4.387828\C  
,0,0.041124,14.216108,4.008103\Au,0,-2.657666,15.907115,5.224526\C,0,-  
2.469812,13.540073,2.790912\C,0,0.75696,15.197554,4.655993\C,0,0.69506  
1,13.431959,3.055436\C,0,-3.435333,17.706724,5.842515\C,0,-2.454807,14  
.468532,1.771156\C,0,-3.146136,12.368826,2.549391\H,0,0.262333,15.8355  
5,5.377873\C,0,2.104314,15.375494,4.389553\C,0,2.028154,13.626182,2.79  
6663\H,0,0.14695,12.667345,2.518914\C,0,-3.753334,18.025305,7.167048\C  
,0,-3.613053,18.747808,4.912849\H,0,-1.941155,15.409338,1.926036\C,0,-  
3.067039,14.23892,0.571217\C,0,-3.750705,12.145037,1.334117\H,0,-3.203  
779,11.614833,3.324751\H,0,2.656802,16.141527,4.919558\C,0,2.742253,14  
.605347,3.473306\H,0,2.527295,13.010781,2.05849\C,0,-4.20987,19.287176  
,7.538914\C,0,-3.548112,17.009026,8.246226\C,0,-4.060539,20.018118,5.2  
75131\C,0,-3.280167,18.477991,3.459888\H,0,-3.035153,14.995117,-0.2033  
76\C,0,-3.713094,13.073133,0.343114\H,0,-4.266358,11.208308,1.162177\H  
,0,3.796479,14.752128,3.273763\H,0,-4.455029,19.48122,8.575729\C,0,-4.  
356972,20.305292,6.593914\C,0,-2.662531,17.235706,9.287067\C,0,-4.2081  
75,15.785756,8.280729\H,0,-4.177182,20.784172,4.518556\C,0,-1.954048,1  
8.418236,3.005598\C,0,-4.237995,18.262442,2.511054\H,0,-4.191698,12.88  
3032,-0.609553\C,0,-4.799253,21.69537,7.0022\F,0,-1.961986,18.385885,9  
.346489\C,0,-2.465802,16.332367,10.324076\F,0,-5.127552,15.50346,7.343  
397\C,0,-4.02444,14.881619,9.279401\F,0,-0.959106,18.623648,3.854756\C  
,0,-1.666854,18.169481,1.679148\F,0,-5.534312,18.316063,2.882921\C,0,-  
3.939111,17.95392,1.190355\H,0,-4.061009,22.12896,7.665424\H,0,-5.7526  
88,21.63608,7.512461\H,0,-4.899491,22.315191,6.119689\F,0,-1.60331,16.  
608017,11.301662\C,0,-3.151008,15.153901,10.316408\F,0,-4.707916,13.71  
1294,9.275567\F,0,-0.368361,18.129559,1.301531\C,0,-2.639311,17.94742,  
0.795487\F,0,-4.897243,17.74844,0.300943\F,0,-2.979953,14.26783,11.297  
828\F,0,-2.348441,17.685301,-0.490711\Version=ES64L-G09RevE.01\HF=-289  
7.2883901\RMSD=4.898e-09\Dipole=2.0368973,-3.4162145,-1.4243381\Quadru  
pole=56.4972159,-59.6598908,3.1626749,23.3969677,7.6766444,-49.0114243  
\PG=C01 [X(C74H40Au2F20P2)]\@

1\1\GINC-COMPUTE021\SP\RB3LYP\Gen\C74H40Au2F20P2\CRAT\17-Sep-2020\0\#\#  
p b3lyp/gen pseudo=read counterpoise=2 empiricaldispersion=gd3bj nosym  
m gfprint\CrystalExplorer Job symop = x, y, z, r = 9.823\0,1\F,0,1.2  
31243,8.719167,2.882921\C,0,2.52756,8.665544,2.511054\C,0,3.485388,8.8  
81094,3.459888\C,0,2.826444,8.357024,1.190355\C,0,3.152502,9.150911,4.  
912849\C,0,4.811507,8.821339,3.005598\F,0,1.868312,8.151542,0.300943\C  
,0,4.126244,8.350523,0.795487\C,0,3.330222,8.109827,5.842515\C,0,2.705  
016,10.42122,5.275131\F,0,5.806449,9.026751,3.854756\C,0,5.098701,8.57  
2584,1.679148\F,0,4.417113,8.088404,-0.49071\Au,0,4.107889,6.310217,5.  
224526\C,0,3.012221,8.428408,7.167048\C,0,2.408583,10.708395,6.593914\  
H,0,2.588373,11.187275,4.518556\F,0,6.397193,8.53266,1.301531\p,0,5.04  
1866,4.392788,4.387828\C,0,2.555685,9.690279,7.538914\C,0,3.217443,7.4  
12128,8.246226\C,0,1.966301,12.098473,7.0022\C,0,6.806679,4.619212,4.0  
08103\C,0,4.295743,3.943177,2.790912\C,0,4.903099,2.917195,5.439979\H,  
0,2.310526,9.884323,8.575729\C,0,4.103024,7.638809,9.287067\C,0,2.5573  
8,6.188859,8.280729\H,0,1.012866,12.039183,7.512461\H,0,1.866064,12.71  
8294,6.119689\H,0,2.704546,12.532062,7.665424\C,0,7.522515,5.600657,4.  
655993\C,0,7.460616,3.835062,3.055436\C,0,4.310748,4.871634,1.771156\C  
,0,3.619419,2.771929,2.549391\C,0,3.938395,2.90401,6.409897\C,0,5.7078

28,1.801023,5.280881\F,0,4.803569,8.788987,9.346489\C,0,4.299752,6.735  
47,10.324076\F,0,1.638003,5.906563,7.343397\C,0,2.741114,5.284722,9.27  
9401\H,0,7.027888,6.238653,5.377873\C,0,8.869868,5.778597,4.389553\C,0  
,8.793709,4.029285,2.796663\H,0,6.912505,3.070448,2.518914\H,0,4.8244,  
5.812441,1.926036\C,0,3.698516,4.642023,0.571217\C,0,3.01485,2.548139,  
1.334117\H,0,3.561776,2.017936,3.324751\H,0,3.276315,3.753978,6.519924  
\C,0,3.803217,1.824693,7.245638\C,0,5.553445,0.726769,6.110871\H,0,6.4  
588,1.780639,4.50073\F,0,5.162245,7.01112,11.301662\C,0,3.614547,5.557  
004,10.316408\F,0,2.057639,4.114397,9.275567\H,0,9.422357,6.544629,4.9  
19558\C,0,9.507808,5.00845,3.473306\H,0,9.29285,3.413885,2.05849\H,0,3  
.730402,5.39822,-0.203376\C,0,3.052461,3.476237,0.343114\H,0,2.499197,  
1.611411,1.162177\C,0,4.594646,0.76627,7.103792\H,0,3.048688,1.834679,  
8.02234\H,0,6.178256,-0.149595,5.990494\F,0,3.785602,4.670933,11.29782  
8\H,0,10.562034,5.155231,3.273763\H,0,2.573857,3.286135,-0.609553\H,0,  
4.485969,-0.075011,7.777176\C,0,-0.129144,2.501575,7.0022\H,0,-0.22938  
1,3.121397,6.119689\C,0,0.313138,1.111498,6.593914\H,0,0.609101,2.9351  
65,7.665424\H,0,-1.082579,2.442286,7.512461\C,0,0.46024,0.093382,7.538  
914\C,0,0.60957,0.824323,5.275131\C,0,0.916776,-1.16849,7.167048\H,0,0  
.215081,0.287426,8.575729\H,0,0.492928,1.590377,4.518556\C,0,1.057057,  
-0.445986,4.912849\C,0,1.234777,-1.48707,5.842515\C,0,1.121998,-2.1847  
68,8.246226\C,0,1.389943,-0.715804,3.459888\Au,0,2.012444,-3.28668,5.2  
24526\C,0,2.007578,-1.958088,9.287067\C,0,0.461935,-3.408038,8.280729\  
C,0,2.716062,-0.775559,3.005598\C,0,0.432115,-0.931354,2.511054\P,0,2.  
946421,-5.204109,4.387828\F,0,2.708123,-0.80791,9.346489\C,0,2.204307,  
-2.861427,10.324076\F,0,-0.457442,-3.690334,7.343397\C,0,0.645669,-4.3  
12175,9.279401\F,0,3.711004,-0.570147,3.854756\C,0,3.003255,-1.024313,  
1.679148\C,0,0.730999,-1.239873,1.190355\F,0,-0.864202,-0.877731,2.882  
921\C,0,4.711234,-4.977685,4.008103\C,0,2.200298,-5.65372,2.790912\C,0  
,2.807654,-6.679702,5.439979\F,0,3.0668,-2.585777,11.301662\C,0,1.5191  
01,-4.039893,10.316408\F,0,-0.037806,-5.482501,9.275567\F,0,4.301748,-  
1.064236,1.301531\C,0,2.030799,-1.246374,0.795487\F,0,-0.227134,-1.445  
355,0.300943\C,0,5.42707,-3.996241,4.655993\C,0,5.365171,-5.761836,3.0  
55436\C,0,2.215303,-4.725263,1.771156\C,0,1.523974,-6.824968,2.549391\  
C,0,1.84295,-6.692887,6.409897\C,0,3.612383,-7.795874,5.280881\F,0,1.6  
90157,-4.925964,11.297828\F,0,2.321668,-1.508494,-0.49071\H,0,4.932443  
, -3.358244,5.377873\C,0,6.774424,-3.8183,4.389553\C,0,6.698264,-5.5676  
12,2.796663\H,0,4.81706,-6.526449,2.518914\H,0,2.728955,-3.784456,1.92  
6036\C,0,1.603071,-4.954875,0.571217\C,0,0.919405,-7.048758,1.334117\H  
,0,1.466331,-7.578962,3.324751\H,0,1.18087,-5.842919,6.519924\C,0,1.70  
7772,-7.772204,7.245638\C,0,3.458,-8.870129,6.110871\H,0,4.363355,-7.8  
16258,4.50073\H,0,7.326911,-3.052268,4.919558\C,0,7.412362,-4.588448,3  
.473306\H,0,7.197404,-6.183012,2.05849\H,0,1.634957,-4.198677,-0.20337  
6\C,0,0.957016,-6.120661,0.343114\H,0,0.403751,-7.985486,1.162177\H,0,  
0.953243,-7.762218,8.02234\C,0,2.499201,-8.830626,7.103792\H,0,4.08281  
, -9.746492,5.990494\H,0,8.466589,-4.441666,3.273763\H,0,0.478412,-6.31  
0762,-0.609553\H,0,2.390524,-9.671907,7.777176\\Version=ES64L-G09RevE.  
01\HF=-2897.2883819\RMSE=4.898e-09\Dipole=1.7148897,-3.5435521,-1.2772  
597\Quadrupole=23.1421032,17.3063752,-40.4484785,-29.7059508,-1.359337  
6,-23.3868529\PG=C01 [X(C74H40Au2F20P2)]\@

1\1\GINC-COMPUTE021\SP\RB3LYP\Gen\C74H40Au2F20P2\CRAT\17-Sep-2020\0\#\#  
p b3lyp/gen pseudo=read counterpoise=2 empiricaldispersion=gd3bj nosym  
m gfpint\CrystalExplorer Job symop = -x, -y, -z, r = 13.3158\0,1\F,

0,1.231243,8.719167,2.882921\C,0,2.52756,8.665544,2.511054\C,0,3.48538  
8,8.881094,3.459888\C,0,2.826444,8.357024,1.190355\C,0,3.152502,9.1509  
11,4.912849\C,0,4.811507,8.821339,3.005598\F,0,1.868312,8.151542,0.300  
943\C,0,4.126244,8.350523,0.795487\C,0,3.330222,8.109827,5.842515\C,0,  
2.705016,10.42122,5.275131\F,0,5.806449,9.026751,3.854756\C,0,5.098701  
,8.572584,1.679148\F,0,4.417113,8.088404,-0.49071\Au,0,4.107889,6.3102  
17,5.224526\C,0,3.012221,8.428408,7.167048\C,0,2.408583,10.708395,6.59  
3914\H,0,2.588373,11.187275,4.518556\F,0,6.397193,8.53266,1.301531\P,0  
,5.041866,4.392788,4.387828\C,0,2.555685,9.690279,7.538914\C,0,3.21744  
3,7.412128,8.246226\C,0,1.966301,12.098473,7.0022\C,0,6.806679,4.61921  
2,4.008103\C,0,4.295743,3.943177,2.790912\C,0,4.903099,2.917195,5.4399  
79\H,0,2.310526,9.884323,8.575729\C,0,4.103024,7.638809,9.287067\C,0,2  
.55738,6.188859,8.280729\H,0,1.012866,12.039183,7.512461\H,0,1.866064,  
12.718294,6.119689\H,0,2.704546,12.532062,7.665424\C,0,7.522515,5.6006  
57,4.655993\C,0,7.460616,3.835062,3.055436\C,0,4.310748,4.871634,1.771  
156\C,0,3.619419,2.771929,2.549391\C,0,3.938395,2.90401,6.409897\C,0,5  
.707828,1.801023,5.280881\F,0,4.803569,8.788987,9.346489\C,0,4.299752,  
6.73547,10.324076\F,0,1.638003,5.906563,7.343397\C,0,2.741114,5.284722  
,9.279401\H,0,7.027888,6.238653,5.377873\C,0,8.869868,5.778597,4.38955  
3\C,0,8.793709,4.029285,2.796663\H,0,6.912505,3.070448,2.518914\H,0,4.  
8244,5.812441,1.926036\C,0,3.698516,4.642023,0.571217\C,0,3.01485,2.54  
8139,1.334117\H,0,3.561776,2.017936,3.324751\H,0,3.276315,3.753978,6.5  
19924\C,0,3.803217,1.824693,7.245638\C,0,5.553445,0.726769,6.110871\H,  
0,6.4588,1.780639,4.50073\F,0,5.162245,7.01112,11.301662\C,0,3.614547,  
5.557004,10.316408\F,0,2.057639,4.114397,9.275567\H,0,9.422357,6.54462  
9,4.919558\C,0,9.507808,5.00845,3.473306\H,0,9.29285,3.413885,2.05849\  
H,0,3.730402,5.39822,-0.203376\C,0,3.052461,3.476237,0.343114\H,0,2.49  
9197,1.611411,1.162177\C,0,4.594646,0.76627,7.103792\H,0,3.048688,1.83  
4679,8.02234\H,0,6.178256,-0.149595,5.990494\F,0,3.785602,4.670933,11.  
297828\H,0,10.562034,5.155231,3.273763\H,0,2.573857,3.286135,-0.609553  
\H,0,4.485969,-0.075011,7.777176\H,0,1.756966,8.980567,11.502929\C,0,2  
.49521,9.414157,12.166154\H,0,3.448645,9.473446,11.655893\H,0,2.595448  
,8.794334,13.048665\C,0,2.052929,10.804235,12.574441\C,0,1.905826,11.8  
2235,11.62944\C,0,1.756496,11.091409,13.893223\H,0,2.150986,11.628305,  
10.592624\C,0,1.449291,13.084222,12.001307\C,0,1.30901,12.361718,14.25  
5506\H,0,1.873139,10.325355,14.649798\C,0,1.244069,14.1005,10.922129\C  
,0,1.13129,13.402802,13.32584\C,0,0.976124,12.631536,15.708467\C,0,0.3  
58488,13.87382,9.881287\C,0,1.904132,15.32377,10.887626\Au,0,0.353623,  
15.202412,13.943828\C,0,-0.349995,12.69129,16.162756\C,0,1.933952,12.8  
47085,16.657299\F,0,-0.342057,12.723641,9.821864\C,0,0.16176,14.777159  
,8.844278\C,0,1.720398,16.227907,9.888954\F,0,2.823509,15.606066,11.82  
4958\P,0,-0.580355,17.119841,14.780525\F,0,-1.344937,12.485879,15.3135  
99\C,0,-0.637189,12.940045,17.489206\F,0,3.230269,12.793463,16.285435\  
C,0,1.635067,13.155604,17.977999\F,0,-0.700733,14.501509,7.866693\C,0,  
0.846965,15.955626,8.851946\F,0,2.403872,17.398232,9.892787\C,0,-2.345  
167,16.893417,15.160251\C,0,0.165769,17.569452,16.377441\C,0,-0.441588  
,18.595434,13.728375\F,0,-1.935682,12.979968,17.866823\C,0,0.335268,13  
.162107,18.372868\F,0,2.5932,13.361087,18.867411\F,0,0.67591,16.841696  
,7.870526\C,0,-3.061003,15.911973,14.512361\C,0,-2.999104,17.677567,16  
.112919\C,0,0.150764,16.640995,17.397198\C,0,0.842093,18.7407,16.61896  
3\C,0,0.523116,18.608618,12.758456\C,0,-1.246316,19.711605,13.887472\F  
,0,0.044398,13.424226,19.659063\H,0,-2.566376,15.273975,13.790481\C,0,  
-4.408357,15.734033,14.778802\C,0,-4.332197,17.483345,16.371691\H,0,-2

.450994,18.442181,16.649441\H,0,-0.362888,15.700189,17.242317\C,0,0.76  
2996,16.870607,18.597137\C,0,1.446662,18.964489,17.834236\H,0,0.899735  
,19.494694,15.843603\H,0,1.185196,17.758652,12.648431\C,0,0.658295,19.  
687937,11.922716\C,0,-1.091934,20.78586,13.057484\H,0,-1.997288,19.731  
991,14.667624\H,0,-4.960845,14.967999,14.248796\C,0,-5.046296,16.50417  
9,15.695047\H,0,-4.831338,18.098745,17.109865\H,0,0.73111,16.114408,19  
.371731\C,0,1.40905,18.036392,18.825241\H,0,1.962315,19.901218,18.0061  
76\H,0,1.412824,19.67795,11.146015\C,0,-0.133134,20.746359,12.064562\H  
,0,-1.716743,21.662224,13.177859\H,0,-6.100522,16.357399,15.89459\H,0,  
1.887655,18.226494,19.777908\H,0,-0.024458,21.587639,11.391177\\Versio  
n=ES64L-G09RevE.01\HF=-2897.2883998\RMSD=4.898e-09\Dipole=-0.0000004,0  
.0000031,-0.0000041\Quadrupole=-21.493384,52.3639391,-30.8705551,-42.0  
975388,-31.5426931,53.4960832\PG=C01 [X(C74H40Au2F20P2)]\@

1\1\GINC-COMPUTE021\SP\RB3LYP\Gen\C74H40Au2F20P2\CRAT\17-Sep-2020\0\#\#  
p b3lyp/gen pseudo=read counterpoise=2 empiricaldispersion=gd3bj nosym  
m gfpriint\CystalExplorer Job symop = -x, -y, -z, r = 12.9063\0,1\F,  
0,1.231243,8.719167,2.882921\C,0,2.52756,8.665544,2.511054\C,0,3.48538  
8,8.881094,3.459888\C,0,2.826444,8.357024,1.190355\C,0,3.152502,9.1509  
11,4.912849\C,0,4.811507,8.821339,3.005598\F,0,1.868312,8.151542,0.300  
943\C,0,4.126244,8.350523,0.795487\C,0,3.330222,8.109827,5.842515\C,0,  
2.705016,10.42122,5.275131\F,0,5.806449,9.026751,3.854756\C,0,5.098701  
,8.572584,1.679148\F,0,4.417113,8.088404,-0.49071\Au,0,4.107889,6.3102  
17,5.224526\C,0,3.012221,8.428408,7.167048\C,0,2.408583,10.708395,6.59  
3914\H,0,2.588373,11.187275,4.518556\F,0,6.397193,8.53266,1.301531\P,0  
,5.041866,4.392788,4.387828\C,0,2.555685,9.690279,7.538914\C,0,3.21744  
3,7.412128,8.246226\C,0,1.966301,12.098473,7.0022\C,0,6.806679,4.61921  
2,4.008103\C,0,4.295743,3.943177,2.790912\C,0,4.903099,2.917195,5.4399  
79\H,0,2.310526,9.884323,8.575729\C,0,4.103024,7.638809,9.287067\C,0,2  
.55738,6.188859,8.280729\H,0,1.012866,12.039183,7.512461\H,0,1.866064,  
12.718294,6.119689\H,0,2.704546,12.532062,7.665424\C,0,7.522515,5.6006  
57,4.655993\C,0,7.460616,3.835062,3.055436\C,0,4.310748,4.871634,1.771  
156\C,0,3.619419,2.771929,2.549391\C,0,3.938395,2.90401,6.409897\C,0,5  
.707828,1.801023,5.280881\F,0,4.803569,8.788987,9.346489\C,0,4.299752,  
6.73547,10.324076\F,0,1.638003,5.906563,7.343397\C,0,2.741114,5.284722  
,9.279401\H,0,7.027888,6.238653,5.377873\C,0,8.869868,5.778597,4.38955  
3\C,0,8.793709,4.029285,2.796663\H,0,6.912505,3.070448,2.518914\H,0,4.  
8244,5.812441,1.926036\C,0,3.698516,4.642023,0.571217\C,0,3.01485,2.54  
8139,1.334117\H,0,3.561776,2.017936,3.324751\H,0,3.276315,3.753978,6.5  
19924\C,0,3.803217,1.824693,7.245638\C,0,5.553445,0.726769,6.110871\H,  
0,6.4588,1.780639,4.50073\F,0,5.162245,7.01112,11.301662\C,0,3.614547,  
5.557004,10.316408\F,0,2.057639,4.114397,9.275567\H,0,9.422357,6.54462  
9,4.919558\C,0,9.507808,5.00845,3.473306\H,0,9.29285,3.413885,2.05849\  
H,0,3.730402,5.39822,-0.203376\C,0,3.052461,3.476237,0.343114\H,0,2.49  
9197,1.611411,1.162177\C,0,4.594646,0.76627,7.103792\H,0,3.048688,1.83  
4679,8.02234\H,0,6.178256,-0.149595,5.990494\F,0,3.785602,4.670933,11.  
297828\H,0,10.562034,5.155231,3.273763\H,0,2.573857,3.286135,-0.609553  
\H,0,4.485969,-0.075011,7.777176\F,0,2.322579,11.042253,-0.300943\C,0,  
1.364446,10.83677,-1.190355\C,0,0.064646,10.843271,-0.795486\C,0,1.663  
33,10.528251,-2.511054\F,0,-0.226223,11.105391,0.49071\C,0,-0.907811,1  
0.62121,-1.679148\F,0,2.959647,10.474627,-2.88292\C,0,0.705502,10.3127  
, -3.459887\F,0,-2.206303,10.661133,-1.301531\C,0,-0.620617,10.372456,-  
3.005597\C,0,1.038388,10.042884,-4.912848\F,0,-1.615559,10.167045,-3.8

54756\C,0,0.860669,11.083967,-5.842514\C,0,1.485875,8.772574,-5.275131  
\Au,0,0.083001,12.883576,-5.224526\C,0,1.17867,10.765387,-7.167048\C,0  
,1.782307,8.485399,-6.593914\H,0,1.602517,8.006519,-4.518556\P,0,-0.85  
0976,14.801006,-4.387828\C,0,1.635205,9.503514,-7.538914\C,0,0.973447,  
11.781666,-8.246225\C,0,2.224589,7.095322,-7.0022\C,0,-2.615788,14.574  
582,-4.008103\C,0,-0.104852,15.250618,-2.790913\C,0,-0.712209,16.2766,  
-5.439979\H,0,1.880364,9.309471,-8.57573\C,0,0.087867,11.554985,-9.287  
067\C,0,1.63351,13.004935,-8.280728\H,0,1.486345,6.661732,-7.665425\H,  
0,3.178024,7.154612,-7.512461\H,0,2.324826,6.4755,-6.119689\C,0,-3.331  
624,13.593138,-4.655993\C,0,-3.269726,15.358732,-3.055435\C,0,-0.11985  
8,14.32216,-1.771156\C,0,0.571471,16.421865,-2.549392\C,0,0.252495,16.  
289783,-6.409897\C,0,-1.516937,17.392771,-5.280881\F,0,-0.612679,10.40  
4806,-9.34649\C,0,-0.108862,12.458323,-10.324076\F,0,2.552888,13.28723  
1,-7.343396\C,0,1.449776,13.909072,-9.2794\H,0,-2.836998,12.95514,-5.3  
77874\C,0,-4.678978,13.415198,-4.389553\C,0,-4.602818,15.16451,-2.7966  
63\H,0,-2.721615,16.123346,-2.518914\H,0,-0.63351,13.381353,-1.926037\  
C,0,0.492375,14.551772,-0.571217\C,0,1.176041,16.645655,-1.334117\H,0,  
0.629114,17.175859,-3.324751\H,0,0.914575,15.439816,-6.519924\C,0,0.38  
7673,17.369101,-7.245638\C,0,-1.362555,18.467026,-6.110871\H,0,-2.2679  
09,17.413157,-4.500729\F,0,-0.971355,12.182674,-11.301661\C,0,0.576344  
,13.63679,-10.316408\F,0,2.133251,15.079397,-9.275567\H,0,-5.231466,12  
.649165,-4.919558\C,0,-5.316917,14.185345,-3.473306\H,0,-5.101959,15.7  
7991,-2.058489\H,0,0.460488,13.795574,0.203376\C,0,1.138429,15.717557,  
-0.343113\H,0,1.691694,17.582382,-1.162178\H,0,1.142202,17.359116,-8.0  
22339\C,0,-0.403756,18.427525,-7.103792\H,0,-1.987365,19.34339,-5.9904  
95\F,0,0.405289,14.522861,-11.297828\H,0,-6.371144,14.038564,-3.273763  
\H,0,1.617033,15.90766,0.609554\H,0,-0.295079,19.268805,-7.777176\\Ver  
sion=ES64L-G09RevE.01\HF=-2897.2883983\RMSD=4.898e-09\Dipole=-0.000000  
7,0.0000004,-0.0000009\Quadrupole=2.4498202,60.3021117,-62.7519319,-38  
.7261435,2.3701743,-7.8382378\PG=C01 [X(C74H40Au2F20P2)]\@

1\1\GINC-COMPUTE008\SP\RB3LYP\Gen\C74H40Au2F20P2\CRAT\17-Sep-2020\0\#\#  
p b3lyp/gen pseudo=read counterpoise=2 empiricaldispersion=gd3bj nosym  
m gfpriint\CystalExplorer Job symop = -x, -y, -z, r = 13.6043\0,1\F,  
0,1.231243,8.719167,2.882921\C,0,2.52756,8.665544,2.511054\C,0,3.48538  
8,8.881094,3.459888\C,0,2.826444,8.357024,1.190355\C,0,3.152502,9.1509  
11,4.912849\C,0,4.811507,8.821339,3.005598\F,0,1.868312,8.151542,0.300  
943\C,0,4.126244,8.350523,0.795487\C,0,3.330222,8.109827,5.842515\C,0,  
2.705016,10.42122,5.275131\F,0,5.806449,9.026751,3.854756\C,0,5.098701  
,8.572584,1.679148\F,0,4.417113,8.088404,-0.49071\Au,0,4.107889,6.3102  
17,5.224526\C,0,3.012221,8.428408,7.167048\C,0,2.408583,10.708395,6.59  
3914\H,0,2.588373,11.187275,4.518556\F,0,6.397193,8.53266,1.301531\P,0  
,5.041866,4.392788,4.387828\C,0,2.555685,9.690279,7.538914\C,0,3.21744  
3,7.412128,8.246226\C,0,1.966301,12.098473,7.0022\C,0,6.806679,4.61921  
2,4.008103\C,0,4.295743,3.943177,2.790912\C,0,4.903099,2.917195,5.4399  
79\H,0,2.310526,9.884323,8.575729\C,0,4.103024,7.638809,9.287067\C,0,2  
.55738,6.188859,8.280729\H,0,1.012866,12.039183,7.512461\H,0,1.866064,  
12.718294,6.119689\H,0,2.704546,12.532062,7.665424\C,0,7.522515,5.6006  
57,4.655993\C,0,7.460616,3.835062,3.055436\C,0,4.310748,4.871634,1.771  
156\C,0,3.619419,2.771929,2.549391\C,0,3.938395,2.90401,6.409897\C,0,5  
.707828,1.801023,5.280881\F,0,4.803569,8.788987,9.346489\C,0,4.299752,  
6.73547,10.324076\F,0,1.638003,5.906563,7.343397\C,0,2.741114,5.284722  
,9.279401\H,0,7.027888,6.238653,5.377873\C,0,8.869868,5.778597,4.38955

3\C,0,8.793709,4.029285,2.796663\H,0,6.912505,3.070448,2.518914\H,0,4.8244,5.812441,1.926036\C,0,3.698516,4.642023,0.571217\C,0,3.01485,2.548139,1.334117\H,0,3.561776,2.017936,3.324751\H,0,3.276315,3.753978,6.519924\C,0,3.803217,1.824693,7.245638\C,0,5.553445,0.726769,6.110871\H,0,6.4588,1.780639,4.50073\F,0,5.162245,7.01112,11.301662\C,0,3.614547,5.557004,10.316408\F,0,2.057639,4.114397,9.275567\H,0,9.422357,6.544629,4.919558\C,0,9.507808,5.00845,3.473306\H,0,9.29285,3.413885,2.05849\H,0,3.730402,5.39822,-0.203376\C,0,3.052461,3.476237,0.343114\H,0,2.499197,1.611411,1.162177\C,0,4.594646,0.76627,7.103792\H,0,3.048688,1.834679,8.02234\H,0,6.178256,-0.149595,5.990494\F,0,3.785602,4.670933,11.297828\H,0,10.562034,5.155231,3.273763\H,0,2.573857,3.286135,-0.609553\H,0,4.485969,-0.075011,7.777176\F,0,5.34602,-2.352098,7.870526\C,0,5.517075,-3.238169,8.851946\C,0,6.390507,-2.965888,9.888954\C,0,4.831869,-4.416636,8.844278\F,0,7.073982,-1.795562,9.892787\C,0,6.574242,-3.870024,10.887626\F,0,3.969377,-4.692285,7.866693\C,0,5.028598,-5.319974,9.881287\F,0,7.493619,-3.587728,11.824958\C,0,5.914178,-5.093294,10.922129\F,0,4.328053,-6.470153,9.821864\C,0,6.119401,-6.109573,12.001307\C,0,5.8014,-5.790992,13.32584\C,0,6.575936,-7.371445,11.62944\Au,0,5.023733,-3.991383,13.943828\C,0,5.979119,-6.832076,14.255506\H,0,6.821095,-7.565488,10.592624\C,0,6.723039,-8.38956,12.574441\O,0,4.089755,-2.073953,14.780525\C,0,6.426606,-8.102386,13.893223\C,0,5.646234,-6.562259,15.708467\C,0,7.16532,-9.779637,12.166154\C,0,4.228522,-0.59836,13.728375\C,0,2.324943,-2.300377,15.160251\C,0,4.835879,-1.624342,16.377441\H,0,6.543249,-8.86844,14.649798\C,0,4.320114,-6.502504,16.162756\C,0,6.604061,-6.346709,16.657299\H,0,6.427076,-10.213227,11.502929\H,0,8.118755,-9.720348,11.655893\H,0,7.265558,-10.39946,13.048665\C,0,3.423794,0.517811,13.887472\C,0,5.193226,-0.585176,12.758456\C,0,1.609107,-3.281821,14.512361\C,0,1.671005,-1.516227,16.112919\C,0,4.820874,-2.5528,17.397198\C,0,5.512202,-0.453094,16.618963\F,0,3.325172,-6.707915,15.313599\C,0,4.032921,-6.253749,17.489206\F,0,7.900379,-6.400331,16.285435\C,0,6.305177,-6.038189,17.977999\C,0,3.578176,1.592066,13.057484\H,0,2.672822,0.538196,14.667624\C,0,5.328404,0.494142,11.922716\H,0,5.855306,-1.435143,12.648431\H,0,2.103734,-3.919819,13.790481\C,0,0.261753,-3.459762,14.778802\C,0,0.337913,-1.71045,16.371691\H,0,2.219116,-0.751613,16.649441\H,0,4.307221,-3.493606,17.242317\C,0,5.433106,-2.323188,18.597137\C,0,6.116772,-0.229305,17.834236\H,0,5.569845,0.300899,15.843603\F,0,2.734428,-6.213826,17.866823\C,0,5.005377,-6.031688,18.372868\F,0,7.26331,-5.832707,18.867411\C,0,4.536975,1.552565,12.064562\H,0,2.953366,2.46843,13.177859\H,0,6.082933,0.484156,11.146015\H,0,-0.290735,-4.225795,14.248796\C,0,-0.376186,-2.689615,15.695047\H,0,-0.161228,-1.095049,17.109865\H,0,5.40122,-3.079385,19.371731\C,0,6.07916,-1.157402,18.825241\H,0,6.632425,0.707423,18.006176\F,0,4.714508,-5.769569,19.659063\H,0,4.645652,2.393846,11.391177\H,0,-1.430413,-2.836396,15.89459\H,0,6.557765,-0.9673,19.777908\\Version=ES64L-G09RevE.01\HF=-2897.2884016\RMSD=4.898e-09\Dipole=-0.0000033,-0.0000004,-0.0000035\Quadrupole=5.8331407,-20.7342972,14.9011565,7.0836848,-25.5800404,27.4695015\PG=C01 [X(C74H40Au2F20P2)]\@

1\1\GINC-COMPUTE021\SP\RB3LYP\Gen\C74H40Au2F20P2\CRAT\17-Sep-2020\0\#\#  
p b3lyp/gen pseudo=read counterpoise=2 empiricaldispersion=gd3bj nosym  
m gfpint\\CrystalExplorer Job symop = -x, -y, -z, r = 9.41464\\0,1\F,  
0,1.231243,8.719167,2.882921\C,0,2.52756,8.665544,2.511054\C,0,3.48538  
8,8.881094,3.459888\C,0,2.826444,8.357024,1.190355\C,0,3.152502,9.1509

11,4.912849\C,0,4.811507,8.821339,3.005598\F,0,1.868312,8.151542,0.300  
943\C,0,4.126244,8.350523,0.795487\C,0,3.330222,8.109827,5.842515\C,0,  
2.705016,10.42122,5.275131\F,0,5.806449,9.026751,3.854756\C,0,5.098701  
,8.572584,1.679148\F,0,4.417113,8.088404,-0.49071\Au,0,4.107889,6.3102  
17,5.224526\C,0,3.012221,8.428408,7.167048\C,0,2.408583,10.708395,6.59  
3914\H,0,2.588373,11.187275,4.518556\F,0,6.397193,8.53266,1.301531\P,0  
,5.041866,4.392788,4.387828\C,0,2.555685,9.690279,7.538914\C,0,3.21744  
3,7.412128,8.246226\C,0,1.966301,12.098473,7.0022\C,0,6.806679,4.61921  
2,4.008103\C,0,4.295743,3.943177,2.790912\C,0,4.903099,2.917195,5.4399  
79\H,0,2.310526,9.884323,8.575729\C,0,4.103024,7.638809,9.287067\C,0,2  
.55738,6.188859,8.280729\H,0,1.012866,12.039183,7.512461\H,0,1.866064,  
12.718294,6.119689\H,0,2.704546,12.532062,7.665424\C,0,7.522515,5.6006  
57,4.655993\C,0,7.460616,3.835062,3.055436\C,0,4.310748,4.871634,1.771  
156\C,0,3.619419,2.771929,2.549391\C,0,3.938395,2.90401,6.409897\C,0,5  
.707828,1.801023,5.280881\F,0,4.803569,8.788987,9.346489\C,0,4.299752,  
6.73547,10.324076\F,0,1.638003,5.906563,7.343397\C,0,2.741114,5.284722  
,9.279401\H,0,7.027888,6.238653,5.377873\C,0,8.869868,5.778597,4.38955  
3\C,0,8.793709,4.029285,2.796663\H,0,6.912505,3.070448,2.518914\H,0,4.  
8244,5.812441,1.926036\C,0,3.698516,4.642023,0.571217\C,0,3.01485,2.54  
8139,1.334117\H,0,3.561776,2.017936,3.324751\H,0,3.276315,3.753978,6.5  
19924\C,0,3.803217,1.824693,7.245638\C,0,5.553445,0.726769,6.110871\H,  
0,6.4588,1.780639,4.50073\F,0,5.162245,7.01112,11.301662\C,0,3.614547,  
5.557004,10.316408\F,0,2.057639,4.114397,9.275567\H,0,9.422357,6.54462  
9,4.919558\C,0,9.507808,5.00845,3.473306\H,0,9.29285,3.413885,2.05849\  
H,0,3.730402,5.39822,-0.203376\C,0,3.052461,3.476237,0.343114\H,0,2.49  
9197,1.611411,1.162177\C,0,4.594646,0.76627,7.103792\H,0,3.048688,1.83  
4679,8.02234\H,0,6.178256,-0.149595,5.990494\F,0,3.785602,4.670933,11.  
297828\H,0,10.562034,5.155231,3.273763\H,0,2.573857,3.286135,-0.609553  
\H,0,4.485969,-0.075011,7.777176\Au,0,7.119178,5.605514,13.943828\P,0,  
6.1852,7.522944,14.780525\C,0,7.896845,3.805905,13.32584\C,0,6.323967,  
8.998537,13.728375\C,0,4.420388,7.29652,15.160251\C,0,6.931324,7.97255  
5,16.377441\C,0,8.214846,3.487324,12.001307\C,0,8.074565,2.764821,14.2  
55506\C,0,7.288671,9.011722,12.758456\C,0,5.519239,10.114709,13.887472  
\C,0,3.704552,6.315076,14.512361\C,0,3.766451,8.08067,16.112919\C,0,6.  
916319,7.044097,17.397198\C,0,7.607647,9.143804,16.618963\C,0,8.009624  
,4.503603,10.922129\C,0,8.671381,2.225452,11.62944\C,0,8.522051,1.4945  
12,13.893223\C,0,7.741679,3.034638,15.708467\H,0,7.950751,8.161755,12.  
648431\C,0,7.42385,10.091039,11.922716\C,0,5.673621,11.188963,13.05748  
4\H,0,4.768267,10.135094,14.667624\H,0,4.199179,5.677078,13.790481\C,0  
,2.357198,6.137136,14.778802\C,0,2.433358,7.886447,16.371691\H,0,4.314  
561,8.845284,16.649441\H,0,6.402667,6.103291,17.242317\C,0,7.528551,7.  
273709,18.597137\C,0,8.212217,9.367593,17.834236\H,0,7.66529,9.897797,  
15.843603\C,0,7.124043,4.276923,9.881287\C,0,8.669686,5.726872,10.8876  
26\H,0,8.916541,2.031409,10.592624\C,0,8.818483,1.207337,12.574441\H,0  
,8.638694,0.728457,14.649798\C,0,6.415559,3.094393,16.162756\C,0,8.699  
507,3.250188,16.657299\H,0,8.178379,10.081053,11.146015\C,0,6.632421,1  
1.149462,12.064562\H,0,5.048811,12.065327,13.177859\H,0,1.80471,5.3711  
02,14.248796\C,0,1.719259,6.907282,15.695047\H,0,1.934217,8.501847,17.  
109865\H,0,7.496665,6.517512,19.371731\C,0,8.174605,8.439495,18.825241  
\H,0,8.72787,10.30432,18.006176\F,0,6.423498,3.126744,9.821864\C,0,6.9  
27314,5.180261,8.844278\C,0,8.485952,6.63101,9.888954\F,0,9.589064,6.0  
09169,11.824958\C,0,9.260765,-0.182741,12.166154\F,0,5.420618,2.888982  
,15.313599\C,0,6.128366,3.343148,17.489206\F,0,9.995824,3.196566,16.28

5435\C,0,8.400622,3.558708,17.977999\H,0,6.741097,11.990743,11.391177\  
H,0,0.665033,6.760501,15.89459\H,0,8.65321,8.629598,19.777908\F,0,6.06  
4822,4.904612,7.866693\C,0,7.61252,6.358728,8.851946\F,0,9.169428,7.80  
1335,9.892787\H,0,8.522521,-0.61633,11.502929\H,0,10.2142,-0.123451,11  
.655893\H,0,9.361003,-0.802563,13.048665\F,0,4.829873,3.383071,17.8668  
23\C,0,7.100822,3.565209,18.372868\F,0,9.358755,3.76419,18.867411\F,0,  
7.441465,7.244799,7.870526\F,0,6.809953,3.827328,19.659063\\Version=ES  
64L-G09RevE.01\HF=-2897.2883772\RMSD=4.898e-09\Dipole=-0.0000038,-0.00  
00008,-0.0000049\Quadrupole=-17.0259103,22.0019329,-4.9760227,-2.46199  
93,-23.2719419,40.2166506\PG=C01 [X(C74H40Au2F20P2)]\@\

1\1\GINC-COMPUTE021\SP\RB3LYP\Gen\C74H40Au2F20P2\CRAT\17-Sep-2020\0\#\#  
p b3lyp/gen pseudo=read counterpoise=2 empiricaldispersion=gd3bj nosym  
m gfpriint\CystalExplorer Job symop = -x, -y, -z, r = 13.0247\0,1\F,  
0,1.231243,8.719167,2.882921\C,0,2.52756,8.665544,2.511054\C,0,3.48538  
8,8.881094,3.459888\C,0,2.826444,8.357024,1.190355\C,0,3.152502,9.1509  
11,4.912849\C,0,4.811507,8.821339,3.005598\F,0,1.868312,8.151542,0.300  
943\C,0,4.126244,8.350523,0.795487\C,0,3.330222,8.109827,5.842515\C,0,  
2.705016,10.42122,5.275131\F,0,5.806449,9.026751,3.854756\C,0,5.098701  
,8.572584,1.679148\F,0,4.417113,8.088404,-0.49071\Au,0,4.107889,6.3102  
17,5.224526\C,0,3.012221,8.428408,7.167048\C,0,2.408583,10.708395,6.59  
3914\H,0,2.588373,11.187275,4.518556\F,0,6.397193,8.53266,1.301531\P,0  
,5.041866,4.392788,4.387828\C,0,2.555685,9.690279,7.538914\C,0,3.21744  
3,7.412128,8.246226\C,0,1.966301,12.098473,7.0022\C,0,6.806679,4.61921  
2,4.008103\C,0,4.295743,3.943177,2.790912\C,0,4.903099,2.917195,5.4399  
79\H,0,2.310526,9.884323,8.575729\C,0,4.103024,7.638809,9.287067\C,0,2  
.55738,6.188859,8.280729\H,0,1.012866,12.039183,7.512461\H,0,1.866064,  
12.718294,6.119689\H,0,2.704546,12.532062,7.665424\C,0,7.522515,5.6006  
57,4.655993\C,0,7.460616,3.835062,3.055436\C,0,4.310748,4.871634,1.771  
156\C,0,3.619419,2.771929,2.549391\C,0,3.938395,2.90401,6.409897\C,0,5  
.707828,1.801023,5.280881\F,0,4.803569,8.788987,9.346489\C,0,4.299752,  
6.73547,10.324076\F,0,1.638003,5.906563,7.343397\C,0,2.741114,5.284722  
,9.279401\H,0,7.027888,6.238653,5.377873\C,0,8.869868,5.778597,4.38955  
3\C,0,8.793709,4.029285,2.796663\H,0,6.912505,3.070448,2.518914\H,0,4.  
8244,5.812441,1.926036\C,0,3.698516,4.642023,0.571217\C,0,3.01485,2.54  
8139,1.334117\H,0,3.561776,2.017936,3.324751\H,0,3.276315,3.753978,6.5  
19924\C,0,3.803217,1.824693,7.245638\C,0,5.553445,0.726769,6.110871\H,  
0,6.4588,1.780639,4.50073\F,0,5.162245,7.01112,11.301662\C,0,3.614547,  
5.557004,10.316408\F,0,2.057639,4.114397,9.275567\H,0,9.422357,6.54462  
9,4.919558\C,0,9.507808,5.00845,3.473306\H,0,9.29285,3.413885,2.05849\  
H,0,3.730402,5.39822,-0.203376\C,0,3.052461,3.476237,0.343114\H,0,2.49  
9197,1.611411,1.162177\C,0,4.594646,0.76627,7.103792\H,0,3.048688,1.83  
4679,8.02234\H,0,6.178256,-0.149595,5.990494\F,0,3.785602,4.670933,11.  
297828\H,0,10.562034,5.155231,3.273763\H,0,2.573857,3.286135,-0.609553\  
\H,0,4.485969,-0.075011,7.777176\F,0,6.654696,10.661133,-1.301531\C,0,  
7.953189,10.62121,-1.679148\C,0,8.925647,10.843271,-0.795486\C,0,8.240  
383,10.372456,-3.005597\F,0,8.634777,11.105391,0.49071\C,0,10.225446,1  
0.83677,-1.190355\F,0,7.245441,10.167045,-3.854756\C,0,9.566503,10.312  
7,-3.459887\F,0,11.183578,11.042253,-0.300943\C,0,10.52433,10.528251,-  
2.511054\C,0,9.899388,10.042884,-4.912848\F,0,11.820647,10.474627,-2.8  
8292\C,0,9.721668,11.083967,-5.842514\C,0,10.346874,8.772574,-5.275131\  
\Au,0,8.944001,12.883576,-5.224526\C,0,10.03967,10.765387,-7.167048\C,  
0,10.643308,8.485399,-6.593914\H,0,10.463517,8.006519,-4.518556\P,0,8.



010024,14.801006,-4.387828\C,0,10.496205,9.503514,-7.538914\C,0,9.8344  
48,11.781666,-8.246225\C,0,11.085589,7.095322,-7.0022\C,0,6.245212,14.  
574582,-4.008103\C,0,8.756147,15.250618,-2.790913\C,0,8.148791,16.2766  
, -5.439979\H,0,10.741364,9.309471,-8.57573\C,0,8.948867,11.554985,-9.2  
87067\C,0,10.494511,13.004935,-8.280728\H,0,10.347344,6.661732,-7.6654  
25\H,0,12.039023,7.154612,-7.512461\H,0,11.185826,6.4755,-6.119689\C,0  
,5.529376,13.593138,-4.655993\C,0,5.591274,15.358732,-3.055435\C,0,8.7  
41142,14.32216,-1.771156\C,0,9.432471,16.421865,-2.549392\C,0,9.113495  
,16.289783,-6.409897\C,0,7.344062,17.392771,-5.280881\F,0,8.248322,10.  
404806,-9.34649\C,0,8.752138,12.458323,-10.324076\F,0,11.413888,13.287  
231,-7.343396\C,0,10.310776,13.909072,-9.2794\H,0,6.024003,12.95514,-5  
.377874\C,0,4.182022,13.415198,-4.389553\C,0,4.258182,15.16451,-2.7966  
63\H,0,6.139385,16.123346,-2.518914\H,0,8.22749,13.381353,-1.926037\C,  
0,9.353374,14.551772,-0.571217\C,0,10.037041,16.645655,-1.334117\H,0,9  
.490114,17.175859,-3.324751\H,0,9.775575,15.439816,-6.519924\C,0,9.248  
673,17.369101,-7.245638\C,0,7.498445,18.467026,-6.110871\H,0,6.593091,  
17.413157,-4.500729\F,0,7.889646,12.182674,-11.301661\C,0,9.437344,13.  
63679,-10.316408\F,0,10.994251,15.079397,-9.275567\H,0,3.629534,12.649  
165,-4.919558\C,0,3.544083,14.185345,-3.473306\H,0,3.759041,15.77991,-  
2.058489\H,0,9.321488,13.795574,0.203376\C,0,9.999429,15.717557,-0.343  
113\H,0,10.552693,17.582382,-1.162178\H,0,10.003202,17.359116,-8.02233  
9\C,0,8.457244,18.427525,-7.103792\H,0,6.873635,19.34339,-5.990495\F,0  
,9.266289,14.522861,-11.297828\H,0,2.489856,14.038564,-3.273763\H,0,10  
.478033,15.90766,0.609554\H,0,8.565921,19.268805,-7.777176\\Version=ES  
64L-G09RevE.01\HF=-2897.2884031\RMSD=4.898e-09\Dipole=0.0000023,0.0000  
003,-0.0000025\Quadrupole=-20.3541062,71.5100165,-51.1559103,-11.70363  
54,16.015442,-8.2142716\PG=C01 [X(C74H40Au2F20P2)]\@

## Compound 2b

1\1\GINC-COMPUTE008\SP\RB3LYP\Gen\C72H30Au2F26P2\CRAT\17-Sep-2020\0\#\#  
p b3lyp/gen pseudo=read counterpoise=2 empiricaldispersion=gd3bj nosym  
m gfpint\CystalExplorer Job symop = -x, -y, -z, r = 7.21701\0,1\C,  
0,0.646857,0.690313,4.643787\C,0,-0.289448,-0.110887,5.29309\H,0,0.362  
348,1.671908,4.285557\C,0,1.940134,0.237901,4.455999\H,0,-1.295551,0.2  
56179,5.453665\C,0,0.05887,-1.354789,5.724367\C,0,2.27384,-1.023049,4.  
896824\p,0,3.119179,1.326103,3.601402\H,0,-0.676865,-1.981443,6.213095  
\C,0,1.338807,-1.818717,5.544536\H,0,3.276515,-1.398855,4.734499\C,0,4  
.487348,0.199656,3.179673\Au,0,2.221456,2.414068,1.803565\C,0,3.724226  
,2.46836,4.860221\H,0,1.616944,-2.800786,5.906744\C,0,4.370838,-0.5220  
15,2.016339\C,0,5.59884,0.017405,3.999259\C,0,1.425201,3.420273,0.1877  
89\C,0,4.044777,3.775149,4.483053\C,0,3.878666,2.089865,6.212935\H,0,3  
.52822,-0.348835,1.358284\C,0,5.318672,-1.460937,1.680548\C,0,6.544506  
, -0.933937,3.660285\H,0,5.720281,0.614896,4.894278\C,0,1.523154,2.8657  
07,-1.107634\C,0,0.728777,4.638079,0.337383\H,0,3.945341,4.07722,3.447  
829\C,0,4.490199,4.684927,5.42677\H,0,3.630856,1.085734,6.534245\C,0,4  
.35471,3.027983,7.131189\H,0,5.217138,-2.023348,0.760703\C,0,6.399437,  
-1.691513,2.514457\H,0,7.406222,-1.08676,4.298129\C,0,0.99051,3.550285  
, -2.194579\C,0,2.100222,1.523253,-1.32566\C,0,0.472935,5.217031,1.6853  
22\C,0,0.227739,5.279076,-0.775025\H,0,4.721585,5.697423,5.119943\C,0,  
4.642397,4.327659,6.741289\H,0,4.502676,2.737405,8.163867\H,0,7.124159  
, -2.458232,2.269854\F,0,1.072627,3.028912,-3.437485\C,0,0.374494,4.764  
704,-2.040211\C,0,1.290925,0.412258,-1.518222\C,0,3.475182,1.27802,-1.

298605\C,0,-0.812592,5.196018,2.227999\C,0,1.461431,5.763367,2.473079\  
F,0,-0.438008,6.450929,-0.641346\H,0,4.984092,5.05336,7.469049\F,0,-0.  
11192,5.430765,-3.117608\C,0,1.784695,-0.855341,-1.653494\F,0,-0.04595  
3,0.58478,-1.542094\F,0,4.31998,2.308739,-1.131505\C,0,3.993993,0.0106  
47,-1.42592\F,0,-1.813887,4.661423,1.502308\C,0,-1.097406,5.716374,3.4  
6613\C,0,1.205181,6.288127,3.731899\F,0,2.718475,5.851897,2.013156\F,0  
,0.981832,-1.901302,-1.850831\C,0,3.145651,-1.058009,-1.605751\F,0,5.3  
21927,-0.183328,-1.371811\F,0,-2.345824,5.655281,3.951516\C,0,-0.08431  
,6.239904,4.215693\F,0,2.179548,6.835141,4.460773\F,0,3.656967,-2.2908  
33,-1.71556\F,0,-0.342828,6.745131,5.43791\Au,0,-2.221455,-2.414068,-1  
.803566\C,0,-1.425201,-3.420273,-0.187788\P,0,-3.119179,-1.326103,-3.6  
01402\C,0,-0.728777,-4.638079,-0.337383\C,0,-1.523154,-2.865707,1.1076  
34\C,0,-1.940133,-0.237901,-4.455998\C,0,-3.724226,-2.46836,-4.860221\  
C,0,-4.487348,-0.199656,-3.179674\C,0,-0.472935,-5.217031,-1.685322\C,  
0,-0.227739,-5.279075,0.775025\C,0,-0.99051,-3.550285,2.194579\C,0,-2.  
100222,-1.523254,1.32566\C,0,-0.646857,-0.690313,-4.643787\C,0,-2.2738  
4,1.023049,-4.896824\C,0,-4.044777,-3.775149,-4.483053\C,0,-3.878666,-  
2.089864,-6.212935\C,0,-4.370838,0.522015,-2.016339\C,0,-5.598839,-0.0  
17405,-3.999259\C,0,0.812592,-5.196017,-2.227999\C,0,-1.46143,-5.76336  
7,-2.473079\F,0,0.438008,-6.450929,0.641346\C,0,-0.374494,-4.764704,2.  
040211\F,0,-1.072627,-3.028912,3.437485\C,0,-1.290925,-0.412258,1.5182  
22\C,0,-3.475182,-1.27802,1.298605\H,0,-0.362348,-1.671908,-4.285556\C  
,0,0.289448,0.110887,-5.29309\C,0,-1.338807,1.818717,-5.544536\H,0,-3.  
276515,1.398855,-4.734499\H,0,-3.945341,-4.07722,-3.447829\C,0,-4.4901  
99,-4.684927,-5.42677\C,0,-4.35471,-3.027983,-7.131189\H,0,-3.630855,-  
1.085734,-6.534245\H,0,-3.52822,0.348834,-1.358284\C,0,-5.318672,1.460  
937,-1.680548\C,0,-6.544506,0.933937,-3.660285\H,0,-5.720282,-0.614897  
, -4.894278\F,0,1.813888,-4.661422,-1.502308\C,0,1.097406,-5.716375,-3.  
466131\F,0,-2.718475,-5.851897,-2.013157\C,0,-1.205181,-6.288126,-3.73  
1899\F,0,0.11192,-5.430765,3.117608\F,0,0.045953,-0.58478,1.542094\C,0  
, -1.784695,0.85534,1.653494\C,0,-3.993993,-0.010647,1.42592\F,0,-4.319  
98,-2.308739,1.131505\C,0,-0.05887,1.354788,-5.724367\H,0,1.295551,-0.  
256179,-5.453665\H,0,-1.616944,2.800786,-5.906744\H,0,-4.721586,-5.697  
423,-5.119943\C,0,-4.642398,-4.327659,-6.74129\H,0,-4.502676,-2.737405  
, -8.163867\H,0,-5.217137,2.023348,-0.760703\C,0,-6.399437,1.691512,-2.  
514456\H,0,-7.406221,1.08676,-4.298129\F,0,2.345824,-5.655281,-3.95151  
6\C,0,0.08431,-6.239904,-4.215693\F,0,-2.179548,-6.835142,-4.460773\F,  
0,-0.981832,1.901302,1.850831\C,0,-3.145652,1.058009,1.605751\F,0,-5.3  
21927,0.183328,1.371811\H,0,0.676865,1.981443,-6.213095\H,0,-4.984092,  
-5.05336,-7.469049\H,0,-7.124159,2.458232,-2.269854\F,0,0.342828,-6.74  
5131,-5.43791\F,0,-3.656968,2.290832,1.715559\\Version=ES64L-G09RevE.0  
1\HF=-3155.6678887\RMSD=6.087e-09\Dipole=-0.0000014,0.0000031,-0.00000  
08\Quadrupole=8.6449338,-41.129775,32.4848412,1.3608621,38.7492857,3.3  
013153\PG=C01[X(C72H30Au2F26P2)]\@

1\1\GINC-COMPUTE008\SP\RB3LYP\Gen\C72H30Au2F26P2\CRAT\17-Sep-2020\0\#\#  
p b3lyp/gen pseudo=read counterpoise=2 empiricaldispersion=gd3bj nosym  
m gfpint\\CrystalExplorer Job symop = -x, -y, -z, r = 12.6477\\0,1\C,  
0,0.646857,0.690313,4.643787\C,0,-0.289448,-0.110887,5.29309\H,0,0.362  
348,1.671908,4.285557\C,0,1.940134,0.237901,4.455999\H,0,-1.295551,0.2  
56179,5.453665\C,0,0.05887,-1.354789,5.724367\C,0,2.27384,-1.023049,4.  
896824\P,0,3.119179,1.326103,3.601402\H,0,-0.676865,-1.981443,6.213095  
\C,0,1.338807,-1.818717,5.544536\H,0,3.276515,-1.398855,4.734499\C,0,4

.487348,0.199656,3.179673\Au,0,2.221456,2.414068,1.803565\C,0,3.724226  
,2.46836,4.860221\H,0,1.616944,-2.800786,5.906744\C,0,4.370838,-0.5220  
15,2.016339\C,0,5.59884,0.017405,3.999259\C,0,1.425201,3.420273,0.1877  
89\C,0,4.044777,3.775149,4.483053\C,0,3.878666,2.089865,6.212935\H,0,3  
.52822,-0.348835,1.358284\C,0,5.318672,-1.460937,1.680548\C,0,6.544506  
, -0.933937,3.660285\H,0,5.720281,0.614896,4.894278\C,0,1.523154,2.8657  
07,-1.107634\C,0,0.728777,4.638079,0.337383\H,0,3.945341,4.07722,3.447  
829\C,0,4.490199,4.684927,5.42677\H,0,3.630856,1.085734,6.534245\C,0,4  
.35471,3.027983,7.131189\H,0,5.217138,-2.023348,0.760703\C,0,6.399437,  
-1.691513,2.514457\H,0,7.406222,-1.08676,4.298129\C,0,0.99051,3.550285  
, -2.194579\C,0,2.100222,1.523253,-1.32566\C,0,0.472935,5.217031,1.6853  
22\C,0,0.227739,5.279076,-0.775025\H,0,4.721585,5.697423,5.119943\C,0,  
4.642397,4.327659,6.741289\H,0,4.502676,2.737405,8.163867\H,0,7.124159  
, -2.458232,2.269854\F,0,1.072627,3.028912,-3.437485\C,0,0.374494,4.764  
704,-2.040211\C,0,1.290925,0.412258,-1.518222\C,0,3.475182,1.27802,-1.  
298605\C,0,-0.812592,5.196018,2.227999\C,0,1.461431,5.763367,2.473079\  
F,0,-0.438008,6.450929,-0.641346\H,0,4.984092,5.05336,7.469049\F,0,-0.  
11192,5.430765,-3.117608\C,0,1.784695,-0.855341,-1.653494\F,0,-0.04595  
3,0.58478,-1.542094\F,0,4.31998,2.308739,-1.131505\C,0,3.993993,0.0106  
47,-1.42592\F,0,-1.813887,4.661423,1.502308\C,0,-1.097406,5.716374,3.4  
6613\C,0,1.205181,6.288127,3.731899\F,0,2.718475,5.851897,2.013156\F,0  
,0.981832,-1.901302,-1.850831\C,0,3.145651,-1.058009,-1.605751\F,0,5.3  
21927,-0.183328,-1.371811\F,0,-2.345824,5.655281,3.951516\C,0,-0.08431  
,6.239904,4.215693\F,0,2.179548,6.835141,4.460773\F,0,3.656967,-2.2908  
33,-1.71556\F,0,-0.342828,6.745131,5.43791\C,0,1.3434,-0.940842,9.1729  
91\H,0,1.001706,-1.666543,8.445231\C,0,1.631088,0.358834,8.783092\C,0,  
1.495599,-1.298109,10.487511\H,0,1.483121,0.649412,7.750414\C,0,2.1071  
32,1.296953,9.701345\C,0,1.941021,-0.388332,11.431228\H,0,1.264212,-2.  
310606,10.794338\H,0,2.354943,2.301083,9.380036\C,0,2.261572,0.918457,  
11.054059\H,0,2.040457,-0.690404,12.466452\P,0,2.866619,2.060714,12.31  
288\C,0,4.045664,3.148916,11.458282\Au,0,3.764343,0.972749,14.110715\C  
,0,1.49845,3.187161,12.734608\C,0,3.711958,4.409866,11.017457\C,0,5.33  
8941,2.696504,11.270494\C,0,4.560597,-0.033456,15.726493\C,0,1.61496,3  
.908832,13.897942\C,0,0.386959,3.369412,11.915023\C,0,4.646991,5.20553  
4,10.369745\H,0,2.709283,4.785672,11.179782\H,0,5.62345,1.714909,11.62  
8725\C,0,6.275246,3.497704,10.621191\C,0,4.462644,0.52111,17.021915\C,  
0,5.25702,-1.251262,15.576899\H,0,2.457577,3.735651,14.555998\C,0,0.66  
7126,4.847754,14.233733\C,0,-0.558708,4.320754,12.253996\H,0,0.265516,  
2.77192,11.020003\C,0,5.926928,4.741605,10.189914\H,0,4.368854,6.18760  
3,10.007537\H,0,7.281349,3.130638,10.460616\C,0,4.995287,-0.163468,18.  
10886\C,0,3.885576,1.863563,17.239941\C,0,5.758059,-1.892258,16.689306  
\C,0,5.512863,-1.830214,14.228959\H,0,0.76866,5.410165,15.153578\C,0,-  
0.413639,5.07833,13.399825\H,0,-1.420424,4.473577,11.616153\H,0,6.6626  
63,5.368259,9.701186\F,0,4.913171,0.357905,19.351767\C,0,5.611304,-1.3  
77887,17.954491\C,0,4.694873,2.974559,17.432503\C,0,2.510616,2.108797,  
17.212887\F,0,6.423806,-3.064112,16.555626\C,0,6.79839,-1.8092,13.6862  
82\C,0,4.524368,-2.37655,13.441202\H,0,-1.138361,5.845049,13.644427\F,  
0,6.097718,-2.043947,19.031889\F,0,6.031751,2.802037,17.456375\C,0,4.2  
01103,4.242157,17.567774\F,0,1.665818,1.078078,17.045786\C,0,1.991805,  
3.37617,17.3402\F,0,7.799685,-1.274605,14.411973\C,0,7.083204,-2.32955  
8,12.448151\F,0,3.267323,-2.46508,13.901124\C,0,4.780617,-2.90131,12.1  
82383\F,0,5.003966,5.288119,17.765112\C,0,2.840146,4.444826,17.520031\  
F,0,0.663871,3.570145,17.286093\F,0,8.331622,-2.268464,11.962765\C,0,6

.070107,-2.853087,11.698587\F,0,3.80625,-3.448325,11.453507\F,0,2.3288  
3,5.677649,17.629841\F,0,6.328626,-3.358315,10.476371\\Version=ES64L-G  
09RevE.01\HF=-3155.6679144\RMSD=6.087e-09\Dipole=-0.0000014,0.0000038,  
0.0000007\Quadrupole=35.1435079,43.0720121,-78.21552,11.3946966,-40.54  
64485,36.8142499\PG=C01 [X(C72H30Au2F26P2)]\ \@

1\1\GINC-COMPUTE041\SP\RB3LYP\Gen\C72H30Au2F26P2\CRAT\17-Sep-2020\0\#\#  
p b3lyp/gen pseudo=read counterpoise=2 empiricaldispersion=gd3bj nosym  
m gfpint\CystalExplorer Job symop = -, r = 10.953\0,1\C,0,0.646857  
,0.690313,4.643787\C,0,-0.289448,-0.110887,5.29309\H,0,0.362348,1.6719  
08,4.285557\C,0,1.940134,0.237901,4.455999\H,0,-1.295551,0.256179,5.45  
3665\C,0,0.05887,-1.354789,5.724367\C,0,2.27384,-1.023049,4.896824\P,0  
,3.119179,1.326103,3.601402\H,0,-0.676865,-1.981443,6.213095\C,0,1.338  
807,-1.818717,5.544536\H,0,3.276515,-1.398855,4.734499\C,0,4.487348,0.  
199656,3.179673\Au,0,2.221456,2.414068,1.803565\C,0,3.724226,2.46836,4  
.860221\H,0,1.616944,-2.800786,5.906744\C,0,4.370838,-0.522015,2.01633  
9\C,0,5.59884,0.017405,3.999259\C,0,1.425201,3.420273,0.187789\C,0,4.0  
44777,3.775149,4.483053\C,0,3.878666,2.089865,6.212935\H,0,3.52822,-0.  
348835,1.358284\C,0,5.318672,-1.460937,1.680548\C,0,6.544506,-0.933937  
,3.660285\H,0,5.720281,0.614896,4.894278\C,0,1.523154,2.865707,-1.1076  
34\C,0,0.728777,4.638079,0.337383\H,0,3.945341,4.07722,3.447829\C,0,4.  
490199,4.684927,5.42677\H,0,3.630856,1.085734,6.534245\C,0,4.35471,3.0  
27983,7.131189\H,0,5.217138,-2.023348,0.760703\C,0,6.399437,-1.691513,  
2.514457\H,0,7.406222,-1.08676,4.298129\C,0,0.99051,3.550285,-2.194579  
\C,0,2.100222,1.523253,-1.32566\C,0,0.472935,5.217031,1.685322\C,0,0.2  
27739,5.279076,-0.775025\H,0,4.721585,5.697423,5.119943\C,0,4.642397,4  
.327659,6.741289\H,0,4.502676,2.737405,8.163867\H,0,7.124159,-2.458232  
,2.269854\F,0,1.072627,3.028912,-3.437485\C,0,0.374494,4.764704,-2.040  
211\C,0,1.290925,0.412258,-1.518222\C,0,3.475182,1.27802,-1.298605\C,0  
,-0.812592,5.196018,2.227999\C,0,1.461431,5.763367,2.473079\F,0,-0.438  
008,6.450929,-0.641346\H,0,4.984092,5.05336,7.469049\F,0,-0.11192,5.43  
0765,-3.117608\C,0,1.784695,-0.855341,-1.653494\F,0,-0.045953,0.58478,  
-1.542094\F,0,4.31998,2.308739,-1.131505\C,0,3.993993,0.010647,-1.4259  
2\F,0,-1.813887,4.661423,1.502308\C,0,-1.097406,5.716374,3.46613\C,0,1  
.205181,6.288127,3.731899\F,0,2.718475,5.851897,2.013156\F,0,0.981832,  
-1.901302,-1.850831\C,0,3.145651,-1.058009,-1.605751\F,0,5.321927,-0.1  
83328,-1.371811\F,0,-2.345824,5.655281,3.951516\C,0,-0.08431,6.239904,  
4.215693\F,0,2.179548,6.835141,4.460773\F,0,3.656967,-2.290833,-1.7155  
6\F,0,-0.342828,6.745131,5.43791\F,0,-1.550032,-0.027747,8.339083\C,0,  
-2.763259,0.01345,8.891309\C,0,-3.699981,-0.921408,8.553926\C,0,-3.011  
536,1.004635,9.81752\C,0,-3.368114,-2.057903,7.627715\C,0,-4.956273,-0  
.789885,9.123657\F,0,-2.047184,1.86949,10.170817\C,0,-4.23677,1.089865  
,10.411123\C,0,-2.645205,-3.177495,8.105144\C,0,-3.795247,-2.019483,6.  
311604\F,0,-5.91795,-1.660837,8.783092\C,0,-5.202398,0.199718,10.05623  
4\F,0,-4.48635,2.014998,11.337334\C,0,-2.353197,-4.201649,7.196438\Au,  
0,-2.115347,-3.317456,10.089018\F,0,-4.498177,-0.958941,5.853272\C,0,-  
3.510799,-3.032573,5.441092\F,0,-6.41648,0.250287,10.638697\C,0,-2.786  
026,-4.114792,5.880327\C,0,-1.595872,-5.407727,7.646812\P,0,-1.605227,  
-3.571131,12.304127\F,0,-3.944279,-2.968411,4.163176\F,0,-2.522608,-5.  
118059,5.01459\C,0,-0.30057,-5.632402,7.280784\C,0,-2.166821,-6.337419  
,8.506184\C,0,-3.026299,-4.089452,13.296382\C,0,-0.347724,-4.863861,12  
.602519\C,0,-1.020773,-2.047081,13.113367\F,0,0.315004,-4.781067,6.432  
552\C,0,0.433127,-6.72004,7.715243\F,0,-3.432365,-6.205328,8.899265\C,

0,-1.466802,-7.433188,8.964515\C,0,-3.751964,-5.210039,12.879428\C,0,-  
3.451894,-3.411588,14.426295\C,0,0.563831,-5.147797,11.585596\C,0,-0.2  
8834,-5.560071,13.786541\C,0,-1.544843,-0.835131,12.662993\C,0,-0.0953  
72,-2.046315,14.144613\F,0,1.706217,-6.89594,7.330118\C,0,-0.167279,-7  
.608748,8.560291\F,0,-2.039382,-8.314556,9.788875\H,0,-3.453518,-5.739  
809,11.983294\C,0,-4.851017,-5.649262,13.601936\C,0,-4.567887,-3.84573  
,15.131298\H,0,-2.911624,-2.534741,14.76145\H,0,0.513275,-4.620015,10.  
641243\C,0,1.542717,-6.118572,11.803622\C,0,0.679517,-6.53412,13.98228  
7\H,0,-1.00255,-5.346368,14.572071\H,0,-2.232203,-0.819463,11.826221\C  
,0,-1.187918,0.341227,13.286834\C,0,0.25955,-0.858667,14.752538\H,0,0.  
347755,-2.978005,14.473879\F,0,0.542839,-8.684871,9.007483\H,0,-5.3974  
94,-6.526075,13.277285\C,0,-5.251994,-4.966431,14.741398\H,0,-4.898991  
, -3.291007,16.000536\H,0,2.270873,-6.335932,11.031939\C,0,1.578027,-6.  
790506,12.984462\H,0,0.722704,-7.083195,14.914865\H,0,-1.607175,1.2806  
05,12.948176\C,0,-0.301491,0.324039,14.337175\H,0,0.982073,-0.860593,1  
5.559392\H,0,-6.099929,-5.316884,15.316858\H,0,2.336353,-7.548068,13.1  
39467\H,0,-0.043288,1.248156,14.839272\\Version=ES64L-G09RevE.01\HF=-3  
155.6634108\RMSD=5.862e-09\Dipole=1.9888764,-2.3331237,6.8362971\Quadr  
upole=-53.527976,-65.0676193,118.5955953,1.4387918,18.62166,-33.429801  
2\PG=C01 [X(C72H30Au2F26P2)]\#@

1\1\GINC-COMPUTE021\SP\RB3LYP\Gen\C72H30Au2F26P2\CRAT\17-Sep-2020\0\#\#  
p b3lyp/gen pseudo=read counterpoise=2 empiricaldispersion=gd3bj nosym  
m gfpriint\\CrystalExplorer Job symop = -x, -y, -z, r = 10.852\\0,1\C,0  
,0.646857,0.690313,4.643787\C,0,-0.289448,-0.110887,5.29309\H,0,0.3623  
48,1.671908,4.285557\C,0,1.940134,0.237901,4.455999\H,0,-1.295551,0.25  
6179,5.453665\C,0,0.05887,-1.354789,5.724367\C,0,2.27384,-1.023049,4.8  
96824\p,0,3.119179,1.326103,3.601402\H,0,-0.676865,-1.981443,6.213095\  
C,0,1.338807,-1.818717,5.544536\H,0,3.276515,-1.398855,4.734499\C,0,4.  
487348,0.199656,3.179673\Au,0,2.221456,2.414068,1.803565\C,0,3.724226,  
2.46836,4.860221\H,0,1.616944,-2.800786,5.906744\C,0,4.370838,-0.52201  
5,2.016339\C,0,5.59884,0.017405,3.999259\C,0,1.425201,3.420273,0.18778  
9\C,0,4.044777,3.775149,4.483053\C,0,3.878666,2.089865,6.212935\H,0,3.  
52822,-0.348835,1.358284\C,0,5.318672,-1.460937,1.680548\C,0,6.544506,  
-0.933937,3.660285\H,0,5.720281,0.614896,4.894278\C,0,1.523154,2.86570  
7,-1.107634\C,0,0.728777,4.638079,0.337383\H,0,3.945341,4.07722,3.4478  
29\C,0,4.490199,4.684927,5.42677\H,0,3.630856,1.085734,6.534245\C,0,4.  
35471,3.027983,7.131189\H,0,5.217138,-2.023348,0.760703\C,0,6.399437,-  
1.691513,2.514457\H,0,7.406222,-1.08676,4.298129\C,0,0.99051,3.550285,  
-2.194579\C,0,2.100222,1.523253,-1.32566\C,0,0.472935,5.217031,1.68532  
2\C,0,0.227739,5.279076,-0.775025\H,0,4.721585,5.697423,5.119943\C,0,4  
.642397,4.327659,6.741289\H,0,4.502676,2.737405,8.163867\H,0,7.124159,  
-2.458232,2.269854\F,0,1.072627,3.028912,-3.437485\C,0,0.374494,4.7647  
04,-2.040211\C,0,1.290925,0.412258,-1.518222\C,0,3.475182,1.27802,-1.2  
98605\C,0,-0.812592,5.196018,2.227999\C,0,1.461431,5.763367,2.473079\F  
,0,-0.438008,6.450929,-0.641346\H,0,4.984092,5.05336,7.469049\F,0,-0.1  
1192,5.430765,-3.117608\C,0,1.784695,-0.855341,-1.653494\F,0,-0.045953  
,0.58478,-1.542094\F,0,4.31998,2.308739,-1.131505\C,0,3.993993,0.01064  
7,-1.42592\F,0,-1.813887,4.661423,1.502308\C,0,-1.097406,5.716374,3.46  
613\C,0,1.205181,6.288127,3.731899\F,0,2.718475,5.851897,2.013156\F,0,  
0.981832,-1.901302,-1.850831\C,0,3.145651,-1.058009,-1.605751\F,0,5.32  
1927,-0.183328,-1.371811\F,0,-2.345824,5.655281,3.951516\C,0,-0.08431,  
6.239904,4.215693\F,0,2.179548,6.835141,4.460773\F,0,3.656967,-2.29083

3,-1.71556\F,0,-0.342828,6.745131,5.43791\F,0,-0.966361,7.842705,-4.46  
0773\C,0,0.008006,8.38972,-3.731899\C,0,-0.248244,8.914479,-2.473079\C  
,0,1.297496,8.437943,-4.215693\F,0,-1.505288,8.825951,-2.013157\C,0,0.  
740251,9.460816,-1.685322\F,0,1.556014,7.932715,-5.43791\C,0,2.310592,  
8.961473,-3.466131\C,0,0.484409,10.039768,-0.337383\C,0,2.025779,9.481  
83,-2.227999\F,0,3.559011,9.022566,-3.951516\C,0,0.985448,9.398772,0.7  
75025\C,0,-0.212014,11.257574,-0.187788\F,0,3.027074,10.016425,-1.5023  
08\F,0,1.651195,8.226917,0.641346\C,0,0.838693,9.913143,2.040211\Au,0,  
-1.008269,12.263779,-1.803566\C,0,-0.309967,11.81214,1.107634\F,0,1.32  
5106,9.247083,3.117608\C,0,0.222676,11.127563,2.194579\P,0,-1.905992,1  
3.351744,-3.601402\C,0,-0.887036,13.154593,1.32566\F,0,0.14056,11.6489  
34,3.437485\C,0,-0.726947,14.439946,-4.455998\C,0,-2.51104,12.209487,-  
4.860221\C,0,-3.274162,14.47819,-3.179674\C,0,-0.077738,14.265589,1.51  
8222\C,0,-2.261996,13.399827,1.298605\C,0,0.56633,13.987534,-4.643787\  
C,0,-1.060654,15.700896,-4.896824\C,0,-2.83159,10.902699,-4.483053\C,0  
,-2.665479,12.587982,-6.212935\C,0,-3.157651,15.199862,-2.016339\C,0,-  
4.385653,14.660441,-3.999259\F,0,1.25914,14.093067,1.542094\C,0,-0.571  
508,15.533187,1.653494\F,0,-3.106794,12.369108,1.131505\C,0,-2.780806,  
14.6672,1.42592\H,0,0.850839,13.005939,-4.285556\C,0,1.502635,14.78873  
4,-5.29309\C,0,-0.125621,16.496565,-5.544536\H,0,-2.063328,16.076702,-  
4.734499\H,0,-2.732154,10.600626,-3.447829\C,0,-3.277013,9.992921,-5.4  
2677\C,0,-3.141523,11.649863,-7.131189\H,0,-2.417669,13.592113,-6.5342  
45\H,0,-2.315034,15.026681,-1.358284\C,0,-4.105485,16.138784,-1.680548  
\C,0,-5.331319,15.611784,-3.660285\H,0,-4.507095,14.06295,-4.894278\F,  
0,0.231354,16.579149,1.850831\C,0,-1.932465,15.735856,1.605751\F,0,-4.  
10874,14.861175,1.371811\H,0,2.508738,14.421667,-5.453665\C,0,1.154316  
,16.032635,-5.724367\H,0,-0.403757,17.478634,-5.906744\H,0,-3.508399,8  
.980424,-5.119943\C,0,-3.429211,10.350188,-6.74129\H,0,-3.28949,11.940  
442,-8.163867\H,0,-4.003951,16.701195,-0.760703\C,0,-5.186251,16.36936  
, -2.514456\H,0,-6.193035,15.764606,-4.298129\F,0,-2.443781,16.968679,1  
.715559\H,0,1.890052,16.65929,-6.213095\H,0,-3.770906,9.624487,-7.4690  
49\H,0,-5.910972,17.13608,-2.269854\\Version=ES64L-G09RevE.01\HF=-3155  
.667909\RMSD=6.087e-09\Dipole=-0.0000028,0.0000087,0.0000049\Quadrupol  
e=-25.5735674,20.7603797,4.8131877,-35.1251466,33.7465,-75.9368863\PG=  
C01 [X(C72H30Au2F26P2)]\@

1\1\GINC-COMPUTE008\SP\RB3LYP\Gen\C72H30Au2F26P2\CRAT\17-Sep-2020\0\#\#  
p b3lyp/gen pseudo=read counterpoise=2 empiricaldispersion=gd3bj nosym  
m gfprint\\CrystalExplorer Job symop = -, r = 9.78419\\0,1\C,0,0.64685  
7,0.690313,4.643787\C,0,-0.289448,-0.110887,5.29309\H,0,0.362348,1.671  
908,4.285557\C,0,1.940134,0.237901,4.455999\H,0,-1.295551,0.256179,5.4  
53665\C,0,0.05887,-1.354789,5.724367\C,0,2.27384,-1.023049,4.896824\P,  
0,3.119179,1.326103,3.601402\H,0,-0.676865,-1.981443,6.213095\C,0,1.33  
8807,-1.818717,5.544536\H,0,3.276515,-1.398855,4.734499\C,0,4.487348,0  
.199656,3.179673\Au,0,2.221456,2.414068,1.803565\C,0,3.724226,2.46836,  
4.860221\H,0,1.616944,-2.800786,5.906744\C,0,4.370838,-0.522015,2.0163  
39\C,0,5.59884,0.017405,3.999259\C,0,1.425201,3.420273,0.187789\C,0,4.  
044777,3.775149,4.483053\C,0,3.878666,2.089865,6.212935\H,0,3.52822,-0  
.348835,1.358284\C,0,5.318672,-1.460937,1.680548\C,0,6.544506,-0.93393  
7,3.660285\H,0,5.720281,0.614896,4.894278\C,0,1.523154,2.865707,-1.107  
634\C,0,0.728777,4.638079,0.337383\H,0,3.945341,4.07722,3.447829\C,0,4  
.490199,4.684927,5.42677\H,0,3.630856,1.085734,6.534245\C,0,4.35471,3.  
027983,7.131189\H,0,5.217138,-2.023348,0.760703\C,0,6.399437,-1.691513

,2.514457\H,0,7.406222,-1.08676,4.298129\C,0,0.99051,3.550285,-2.19457  
9\C,0,2.100222,1.523253,-1.32566\C,0,0.472935,5.217031,1.685322\C,0,0.  
227739,5.279076,-0.775025\H,0,4.721585,5.697423,5.119943\C,0,4.642397,  
4.327659,6.741289\H,0,4.502676,2.737405,8.163867\H,0,7.124159,-2.45823  
2,2.269854\F,0,1.072627,3.028912,-3.437485\C,0,0.374494,4.764704,-2.04  
0211\C,0,1.290925,0.412258,-1.518222\C,0,3.475182,1.27802,-1.298605\C,  
0,-0.812592,5.196018,2.227999\C,0,1.461431,5.763367,2.473079\F,0,-0.43  
8008,6.450929,-0.641346\H,0,4.984092,5.05336,7.469049\F,0,-0.11192,5.4  
30765,-3.117608\C,0,1.784695,-0.855341,-1.653494\F,0,-0.045953,0.58478  
,-1.542094\F,0,4.31998,2.308739,-1.131505\C,0,3.993993,0.010647,-1.425  
92\F,0,-1.813887,4.661423,1.502308\C,0,-1.097406,5.716374,3.46613\C,0,  
1.205181,6.288127,3.731899\F,0,2.718475,5.851897,2.013156\F,0,0.981832  
,-1.901302,-1.850831\C,0,3.145651,-1.058009,-1.605751\F,0,5.321927,-0.  
183328,-1.371811\F,0,-2.345824,5.655281,3.951516\C,0,-0.08431,6.239904  
,4.215693\F,0,2.179548,6.835141,4.460773\F,0,3.656967,-2.290833,-1.715  
56\F,0,-0.342828,6.745131,5.43791\H,0,-2.970511,6.677824,-0.086256\C,0  
,-3.301615,7.232547,0.782983\C,0,-2.617508,8.353248,1.172883\C,0,-4.41  
7608,6.798405,1.487985\H,0,-1.769573,8.703701,0.597422\C,0,-3.018485,9  
.036078,2.312345\C,0,-4.843203,7.476268,2.617899\H,0,-4.957879,5.92155  
8,1.15283\C,0,-4.117538,8.596856,3.034853\H,0,-2.472008,9.912892,2.636  
997\P,0,-6.264275,6.957948,3.610155\H,0,-4.415984,9.126626,3.930986\Au  
,0,-5.754155,6.704273,5.825263\C,0,-7.521779,8.250678,3.311762\C,0,-6.  
848729,5.433898,2.800913\C,0,-5.224297,6.564312,7.809138\C,0,-8.433332  
,8.534614,4.328685\C,0,-7.581162,8.946888,2.127739\C,0,-6.324659,4.221  
949,3.251288\C,0,-7.77413,5.433132,1.769668\C,0,-4.501389,5.44472,8.28  
6566\C,0,-5.516305,7.588465,8.717843\H,0,-8.382777,8.006832,5.273037\C  
,0,-9.412219,9.505389,4.110659\C,0,-8.54902,9.920937,1.931994\H,0,-6.8  
66952,8.733185,1.34221\H,0,-5.637299,4.20628,4.08806\C,0,-6.681583,3.0  
45591,2.627448\C,0,-8.129053,4.245483,1.161742\H,0,-8.217257,6.364822,  
1.440402\C,0,-4.169521,4.308225,7.360355\C,0,-4.074255,5.4063,9.602677  
\C,0,-5.083476,7.501609,10.033955\C,0,-6.273629,8.794543,8.267469\H,0,  
-10.140374,9.72275,4.882342\C,0,-9.447529,10.177323,2.929819\H,0,-8.59  
2207,10.470012,0.999417\H,0,-6.262328,2.106212,2.966104\C,0,-7.56801,3  
.062778,1.577105\H,0,-8.851575,4.24741,0.354888\C,0,-2.913229,4.176702  
,6.790624\C,0,-5.106243,3.373367,7.022972\F,0,-3.371325,4.345758,10.06  
1008\C,0,-4.358703,6.419389,10.473188\F,0,-5.346894,8.504876,10.899691  
\C,0,-5.702681,9.724236,7.408098\C,0,-7.568932,9.019219,8.633497\H,0,-  
10.205855,10.934885,2.774814\H,0,-7.826214,2.138661,1.07501\F,0,-1.951  
552,5.047655,7.131189\C,0,-2.667104,3.187099,5.858047\C,0,-4.857966,2.  
382182,6.096761\F,0,-6.31947,3.414565,7.575198\F,0,-3.925223,6.355228,  
11.751104\F,0,-4.437136,9.592145,7.015015\C,0,-6.402699,10.820004,6.94  
9766\F,0,-8.184506,8.167883,9.481729\C,0,-8.302629,10.106857,8.199038\  
F,0,-1.453022,3.13653,5.275584\C,0,-3.632731,2.296952,5.503159\F,0,-5.  
822318,1.517327,5.743464\F,0,-5.83012,11.701373,6.125407\C,0,-7.702223  
,10.995564,7.353989\F,0,-9.575719,10.282757,8.584163\F,0,-3.383152,1.3  
71818,4.576947\F,0,-8.412341,12.071688,6.906798\\Version=ES64L-G09RevE  
.01\HF=-3155.6633988\RMSD=5.862e-09\Dipole=0.7720049,-1.2525387,-0.604  
6957\Quadrupole=35.5877718,4.4523605,-40.0401323,-8.7310597,54.0379871  
,-40.2423429\PG=C01 [X(C72H30Au2F26P2)]\@

1\1\GINC-COMPUTE041\SP\RB3LYP\Gen\C72H30Au2F26P2\CRAT\17-Sep-2020\0\#\#  
p b3lyp/gen pseudo=read counterpoise=2 empiricaldispersion=gd3bj nosym  
m gfpint\CrystalExplorer Job symop = -, r = 13.0292\0,1\C,0,0.64685

7,0.690313,4.643787\C,0,-0.289448,-0.110887,5.29309\H,0,0.362348,1.671  
908,4.285557\C,0,1.940134,0.237901,4.455999\H,0,-1.295551,0.256179,5.4  
53665\C,0,0.05887,-1.354789,5.724367\C,0,2.27384,-1.023049,4.896824\P,  
0,3.119179,1.326103,3.601402\H,0,-0.676865,-1.981443,6.213095\C,0,1.33  
8807,-1.818717,5.544536\H,0,3.276515,-1.398855,4.734499\C,0,4.487348,0  
.199656,3.179673\Au,0,2.221456,2.414068,1.803565\C,0,3.724226,2.46836,  
4.860221\H,0,1.616944,-2.800786,5.906744\C,0,4.370838,-0.522015,2.0163  
39\C,0,5.59884,0.017405,3.999259\C,0,1.425201,3.420273,0.187789\C,0,4.  
044777,3.775149,4.483053\C,0,3.878666,2.089865,6.212935\H,0,3.52822,-0  
.348835,1.358284\C,0,5.318672,-1.460937,1.680548\C,0,6.544506,-0.93393  
7,3.660285\H,0,5.720281,0.614896,4.894278\C,0,1.523154,2.865707,-1.107  
634\C,0,0.728777,4.638079,0.337383\H,0,3.945341,4.07722,3.447829\C,0,4  
.490199,4.684927,5.42677\H,0,3.630856,1.085734,6.534245\C,0,4.35471,3.  
027983,7.131189\H,0,5.217138,-2.023348,0.760703\C,0,6.399437,-1.691513  
,2.514457\H,0,7.406222,-1.08676,4.298129\C,0,0.99051,3.550285,-2.19457  
9\C,0,2.100222,1.523253,-1.32566\C,0,0.472935,5.217031,1.685322\C,0,0.  
227739,5.279076,-0.775025\H,0,4.721585,5.697423,5.119943\C,0,4.642397,  
4.327659,6.741289\H,0,4.502676,2.737405,8.163867\H,0,7.124159,-2.45823  
2,2.269854\F,0,1.072627,3.028912,-3.437485\C,0,0.374494,4.764704,-2.04  
0211\C,0,1.290925,0.412258,-1.518222\C,0,3.475182,1.27802,-1.298605\C,  
0,-0.812592,5.196018,2.227999\C,0,1.461431,5.763367,2.473079\F,0,-0.43  
8008,6.450929,-0.641346\H,0,4.984092,5.05336,7.469049\F,0,-0.11192,5.4  
30765,-3.117608\C,0,1.784695,-0.855341,-1.653494\F,0,-0.045953,0.58478  
, -1.542094\F,0,4.31998,2.308739,-1.131505\C,0,3.993993,0.010647,-1.425  
92\F,0,-1.813887,4.661423,1.502308\C,0,-1.097406,5.716374,3.46613\C,0,  
1.205181,6.288127,3.731899\F,0,2.718475,5.851897,2.013156\F,0,0.981832  
, -1.901302,-1.850831\C,0,3.145651,-1.058009,-1.605751\F,0,5.321927,-0.  
183328,-1.371811\F,0,-2.345824,5.655281,3.951516\C,0,-0.08431,6.239904  
,4.215693\F,0,2.179548,6.835141,4.460773\F,0,3.656967,-2.290833,-1.715  
56\F,0,-0.342828,6.745131,5.43791\C,0,-3.229894,5.172458,-4.110659\H,0  
, -2.501739,4.955098,-4.882342\C,0,-3.194584,4.500524,-2.929819\C,0,-4.  
208781,6.143233,-4.328685\H,0,-2.436258,3.742962,-2.774814\C,0,-4.0930  
94,4.75691,-1.931994\C,0,-5.120335,6.427169,-3.311762\H,0,-4.259336,6.  
671015,-5.273038\H,0,-4.049907,4.207835,-0.999417\C,0,-5.060951,5.7309  
59,-2.12774\P,0,-6.377838,7.7199,-3.610154\H,0,-5.775162,5.944662,-1.3  
4221\Au,0,-6.887958,7.973574,-5.825263\C,0,-7.79891,7.201578,-2.617899  
\C,0,-5.793384,9.243949,-2.800913\C,0,-7.417817,8.113535,-7.809138\C,0  
, -8.524575,6.080991,-3.034853\C,0,-8.224505,7.879442,-1.487986\C,0,-6.  
317454,10.455898,-3.251287\C,0,-4.867984,9.244715,-1.769668\C,0,-8.140  
725,9.233127,-8.286566\C,0,-7.125808,7.089381,-8.717843\H,0,-8.22613,5  
.551221,-3.930986\C,0,-9.623628,5.641768,-2.312345\C,0,-9.340499,7.445  
3,-0.782983\H,0,-7.684235,8.756289,-1.152831\H,0,-7.004815,10.471567,-  
4.08806\C,0,-5.960529,11.632257,-2.627447\C,0,-4.513061,10.432364,-1.1  
61743\H,0,-4.424857,8.313025,-1.440402\C,0,-8.567859,9.271547,-9.60267  
7\C,0,-8.472592,10.369622,-7.360354\C,0,-7.558637,7.176238,-10.033954\  
C,0,-6.368484,5.883303,-8.267468\H,0,-10.170106,4.764955,-2.636997\C,0  
, -10.024606,6.324599,-1.172883\H,0,-9.671602,8.000023,0.086255\H,0,-6.  
379786,12.571635,-2.966104\C,0,-5.074103,11.615069,-1.577105\H,0,-3.79  
0539,10.430436,-0.354889\F,0,-9.270788,10.332088,-10.061008\C,0,-8.283  
41,8.258457,-10.473188\C,0,-9.728885,10.501144,-6.790624\C,0,-7.535871  
,11.30448,-7.022972\F,0,-7.295219,6.172971,-10.899691\C,0,-6.939432,4.  
953611,-7.408098\C,0,-5.073182,5.658628,-8.633497\H,0,-10.87254,5.9741  
46,-0.597422\H,0,-4.815899,12.539186,-1.07501\F,0,-8.71689,8.322618,-1



1.751105\F,0,-10.690561,9.630193,-7.131189\C,0,-9.97501,11.490748,-5.8  
58047\F,0,-6.322643,11.263283,-7.575198\C,0,-7.784147,12.295665,-6.096  
761\F,0,-8.204977,5.085702,-7.015015\C,0,-6.239414,3.857842,-6.949766\  
F,0,-4.457607,6.509963,-9.481729\C,0,-4.339484,4.57099,-8.199038\F,0,-  
11.189091,11.541317,-5.275584\C,0,-9.009381,12.380896,-5.503158\F,0,-6  
.819795,13.16052,-5.743464\F,0,-6.811993,2.976474,-6.125406\C,0,-4.939  
891,3.682282,-7.35399\F,0,-3.066394,4.39509,-8.584164\F,0,-9.258961,13  
.306028,-4.576947\F,0,-4.229772,2.60616,-6.906798\\Version=ES64L-G09Re  
vE.01\HF=-3155.663417\RMSD=5.862e-09\Dipole=2.7315451,-2.2731969,6.682  
648\Quadrupole=16.941259,1.9303101,-18.871569,26.0700376,-34.8673939,6  
0.720025\PG=C01 [X(C72H30Au2F26P2)]\ \@

1\1\GINC-COMPUTE021\SP\RB3LYP\Gen\C72H30Au2F26P2\CRAT\17-Sep-2020\0\#\#  
p b3lyp/gen pseudo=read counterpoise=2 empiricaldispersion=gd3bj nosym  
m gfpint\CystalExplorer Job symop = -, r = 12.5273\0,1\C,0,0.64685  
7,0.690313,4.643787\C,0,-0.289448,-0.110887,5.29309\H,0,0.362348,1.671  
908,4.285557\C,0,1.940134,0.237901,4.455999\H,0,-1.295551,0.256179,5.4  
53665\C,0,0.05887,-1.354789,5.724367\C,0,2.27384,-1.023049,4.896824\P,  
0,3.119179,1.326103,3.601402\H,0,-0.676865,-1.981443,6.213095\C,0,1.33  
8807,-1.818717,5.544536\H,0,3.276515,-1.398855,4.734499\C,0,4.487348,0  
.199656,3.179673\Au,0,2.221456,2.414068,1.803565\C,0,3.724226,2.46836,  
4.860221\H,0,1.616944,-2.800786,5.906744\C,0,4.370838,-0.522015,2.0163  
39\C,0,5.59884,0.017405,3.999259\C,0,1.425201,3.420273,0.187789\C,0,4.  
044777,3.775149,4.483053\C,0,3.878666,2.089865,6.212935\H,0,3.52822,-0  
.348835,1.358284\C,0,5.318672,-1.460937,1.680548\C,0,6.544506,-0.93393  
7,3.660285\H,0,5.720281,0.614896,4.894278\C,0,1.523154,2.865707,-1.107  
634\C,0,0.728777,4.638079,0.337383\H,0,3.945341,4.07722,3.447829\C,0,4  
.490199,4.684927,5.42677\H,0,3.630856,1.085734,6.534245\C,0,4.35471,3.  
027983,7.131189\H,0,5.217138,-2.023348,0.760703\C,0,6.399437,-1.691513  
,2.514457\H,0,7.406222,-1.08676,4.298129\C,0,0.99051,3.550285,-2.19457  
9\C,0,2.100222,1.523253,-1.32566\C,0,0.472935,5.217031,1.685322\C,0,0.  
227739,5.279076,-0.775025\H,0,4.721585,5.697423,5.119943\C,0,4.642397,  
4.327659,6.741289\H,0,4.502676,2.737405,8.163867\H,0,7.124159,-2.45823  
2,2.269854\F,0,1.072627,3.028912,-3.437485\C,0,0.374494,4.764704,-2.04  
0211\C,0,1.290925,0.412258,-1.518222\C,0,3.475182,1.27802,-1.298605\C,  
0,-0.812592,5.196018,2.227999\C,0,1.461431,5.763367,2.473079\F,0,-0.43  
8008,6.450929,-0.641346\H,0,4.984092,5.05336,7.469049\F,0,-0.11192,5.4  
30765,-3.117608\C,0,1.784695,-0.855341,-1.653494\F,0,-0.045953,0.58478  
, -1.542094\F,0,4.31998,2.308739,-1.131505\C,0,3.993993,0.010647,-1.425  
92\F,0,-1.813887,4.661423,1.502308\C,0,-1.097406,5.716374,3.46613\C,0,  
1.205181,6.288127,3.731899\F,0,2.718475,5.851897,2.013156\F,0,0.981832  
, -1.901302,-1.850831\C,0,3.145651,-1.058009,-1.605751\F,0,5.321927,-0.  
183328,-1.371811\F,0,-2.345824,5.655281,3.951516\C,0,-0.08431,6.239904  
,4.215693\F,0,2.179548,6.835141,4.460773\F,0,3.656967,-2.290833,-1.715  
56\F,0,-0.342828,6.745131,5.43791\F,0,1.756026,5.992977,9.007483\C,0,1  
.045907,7.069099,8.560291\C,0,-0.253616,7.244659,8.964515\C,0,1.646314  
,7.957807,7.715243\C,0,-0.953634,8.340427,8.506184\F,0,-0.826195,6.363  
291,9.788875\F,0,2.919404,7.781907,7.330118\C,0,0.912616,9.045445,7.28  
0784\C,0,-0.382686,9.270121,7.646812\F,0,-2.219179,8.472519,8.899265\F  
,0,1.52819,9.89678,6.432552\C,0,-1.14001,10.476198,7.196438\C,0,-1.572  
839,10.563055,5.880327\C,0,-1.432019,11.500352,8.105144\F,0,-1.309421,  
9.559788,5.01459\C,0,-2.297612,11.645274,5.441092\Au,0,-0.90216,11.360  
391,10.089018\C,0,-2.154927,12.619944,7.627715\F,0,-2.731093,11.709435

,4.163176\C,0,-2.58206,12.658364,6.311604\P,0,-0.39204,11.106716,12.304127\C,0,-2.486795,13.756439,8.553926\F,0,-3.284991,13.718905,5.853272\C,0,-1.813112,10.588395,13.296382\C,0,0.865463,9.813987,12.602519\C,0,0.192414,12.630766,13.113367\C,0,-3.743087,13.887961,9.123657\C,0,-1.550073,14.691297,8.891309\C,0,-2.538777,9.467808,12.879428\C,0,-2.238707,11.266259,14.426295\C,0,1.777017,9.53005,11.585596\C,0,0.924847,9.17776,13.786541\C,0,-0.331656,13.842715,12.662993\C,0,1.117814,12.631532,14.144613\F,0,-4.704763,13.01701,8.783092\C,0,-3.989212,14.877565,10.056234\F,0,-0.336845,14.6501,8.339083\C,0,-1.798349,15.682482,9.81752\H,0,-2.240332,8.938039,11.983294\C,0,-3.63783,9.028584,13.601936\C,0,-3.354701,10.832117,15.131298\H,0,-1.698437,12.143106,14.76145\H,0,1.726462,10.057832,10.641243\C,0,2.755904,8.559275,11.803622\C,0,1.892704,8.143727,13.982287\H,0,0.210636,9.331479,14.572071\H,0,-1.019017,13.858384,11.826221\C,0,0.025268,15.019073,13.286834\C,0,1.472737,13.81918,14.752538\H,0,1.560941,11.699841,14.473879\F,0,-5.203293,14.928134,10.638697\C,0,-3.023584,15.767713,10.411123\F,0,-0.833997,16.547337,10.170817\H,0,-4.184308,8.151772,13.277285\C,0,-4.038808,9.711416,14.741398\H,0,-3.685805,11.38684,16.000536\H,0,3.484059,8.341914,11.031939\C,0,2.791214,7.887341,12.984462\H,0,1.935891,7.594652,14.914865\H,0,-0.393988,15.958452,12.948176\C,0,0.911695,15.001886,14.337175\H,0,2.195259,13.817253,15.559392\F,0,-3.273163,16.692846,11.337334\H,0,-4.886743,9.360963,15.316858\H,0,3.54954,7.129779,13.139467\H,0,1.169898,15.926003,14.839272\\Version=ES64L-G09RevE.01\HF=-3155.6634111\RMSD=5.862e-09\Dipole=2.2459602,-1.9089306,6.4437338\Quadrupole=-40.5243192,-75.6623685,116.1866876,21.6135986,30.1772267,69.5888496\PG=C01 [X(C72H30Au2F26P2)]\@

1\1\GINC-COMPUTE008\SP\RB3LYP\Gen\C72H30Au2F26P2\CRAT\17-Sep-2020\0\#\#  
p b3lyp/gen pseudo=read counterpoise=2 empiricaldispersion=gd3bj nosym  
m gfpint\CrystalExplorer Job symop = -, r = 12.4681\0,1\C,0,0.64685  
7,0.690313,4.643787\C,0,-0.289448,-0.110887,5.29309\H,0,0.362348,1.671  
908,4.285557\C,0,1.940134,0.237901,4.455999\H,0,-1.295551,0.256179,5.4  
53665\C,0,0.05887,-1.354789,5.724367\C,0,2.27384,-1.023049,4.896824\P,  
0,3.119179,1.326103,3.601402\H,0,-0.676865,-1.981443,6.213095\C,0,1.33  
8807,-1.818717,5.544536\H,0,3.276515,-1.398855,4.734499\C,0,4.487348,0.  
.199656,3.179673\Au,0,2.221456,2.414068,1.803565\C,0,3.724226,2.46836,  
4.860221\H,0,1.616944,-2.800786,5.906744\C,0,4.370838,-0.522015,2.0163  
39\C,0,5.59884,0.017405,3.999259\C,0,1.425201,3.420273,0.187789\C,0,4.  
044777,3.775149,4.483053\C,0,3.878666,2.089865,6.212935\H,0,3.52822,-0.  
.348835,1.358284\C,0,5.318672,-1.460937,1.680548\C,0,6.544506,-0.93393  
7,3.660285\H,0,5.720281,0.614896,4.894278\C,0,1.523154,2.865707,-1.107  
634\C,0,0.728777,4.638079,0.337383\H,0,3.945341,4.07722,3.447829\C,0,4.  
.490199,4.684927,5.42677\H,0,3.630856,1.085734,6.534245\C,0,4.35471,3.  
027983,7.131189\H,0,5.217138,-2.023348,0.760703\C,0,6.399437,-1.691513  
,2.514457\H,0,7.406222,-1.08676,4.298129\C,0,0.99051,3.550285,-2.19457  
9\C,0,2.100222,1.523253,-1.32566\C,0,0.472935,5.217031,1.685322\C,0,0.  
227739,5.279076,-0.775025\H,0,4.721585,5.697423,5.119943\C,0,4.642397,  
4.327659,6.741289\H,0,4.502676,2.737405,8.163867\H,0,7.124159,-2.45823  
2,2.269854\F,0,1.072627,3.028912,-3.437485\C,0,0.374494,4.764704,-2.04  
0211\C,0,1.290925,0.412258,-1.518222\C,0,3.475182,1.27802,-1.298605\C,  
0,-0.812592,5.196018,2.227999\C,0,1.461431,5.763367,2.473079\F,0,-0.43  
8008,6.450929,-0.641346\H,0,4.984092,5.05336,7.469049\F,0,-0.11192,5.4  
30765,-3.117608\C,0,1.784695,-0.855341,-1.653494\F,0,-0.045953,0.58478

, -1.542094\F,0,4.31998,2.308739,-1.131505\C,0,3.993993,0.010647,-1.425  
92\F,0,-1.813887,4.661423,1.502308\C,0,-1.097406,5.716374,3.46613\C,0,  
1.205181,6.288127,3.731899\F,0,2.718475,5.851897,2.013156\F,0,0.981832  
,-1.901302,-1.850831\C,0,3.145651,-1.058009,-1.605751\F,0,5.321927,-0.  
183328,-1.371811\F,0,-2.345824,5.655281,3.951516\C,0,-0.08431,6.239904  
,4.215693\F,0,2.179548,6.835141,4.460773\F,0,3.656967,-2.290833,-1.715  
56\F,0,-0.342828,6.745131,5.43791\F,0,1.453022,-3.13653,-5.275584\C,0,  
2.667104,-3.187099,-5.858047\C,0,3.632732,-2.296952,-5.503158\C,0,2.91  
3229,-4.176702,-6.790624\F,0,3.383152,-1.371819,-4.576947\C,0,4.857966  
,-2.382182,-6.096761\F,0,1.951552,-5.047654,-7.131189\C,0,4.169521,-4.  
308225,-7.360354\F,0,5.822319,-1.517327,-5.743464\C,0,5.106243,-3.3733  
67,-7.022972\C,0,4.501388,-5.44472,-8.286566\F,0,6.31947,-3.414564,-7.  
575198\C,0,5.224297,-6.564312,-7.809138\C,0,4.074255,-5.4063,-9.602677  
\Au,0,5.754155,-6.704273,-5.825263\C,0,5.516305,-7.588466,-8.717843\F,  
0,3.371325,-4.345758,-10.061008\C,0,4.358703,-6.419389,-10.473188\P,0,  
6.264275,-6.957947,-3.610154\C,0,5.083476,-7.501609,-10.033954\C,0,6.2  
7363,-8.794543,-8.267468\F,0,3.925223,-6.355228,-11.751105\C,0,6.84872  
9,-5.433898,-2.800913\C,0,4.843203,-7.476269,-2.617899\C,0,7.521779,-8  
.250677,-3.311762\F,0,5.346894,-8.504876,-10.899691\C,0,5.702681,-9.72  
4236,-7.408098\C,0,7.568932,-9.019218,-8.633497\C,0,6.324659,-4.221949  
,-3.251287\C,0,7.77413,-5.433132,-1.769668\C,0,4.117538,-8.596856,-3.0  
34853\C,0,4.417608,-6.798405,-1.487986\C,0,8.433332,-8.534614,-4.32868  
5\C,0,7.581162,-8.946888,-2.12774\F,0,4.437137,-9.592145,-7.015015\C,0  
,6.402699,-10.820004,-6.949766\F,0,8.184506,-8.167884,-9.481729\C,0,8.  
302629,-10.106857,-8.199038\H,0,5.637299,-4.20628,-4.08806\C,0,6.68158  
4,-3.04559,-2.627447\C,0,8.129052,-4.245483,-1.161743\H,0,8.217257,-6.  
364822,-1.440402\H,0,4.415984,-9.126625,-3.930986\C,0,3.018486,-9.0360  
79,-2.312345\C,0,3.301615,-7.232547,-0.782983\H,0,4.957879,-5.921558,-  
1.152831\H,0,8.382777,-8.006832,-5.273038\C,0,9.41222,-9.505389,-4.110  
659\C,0,8.549019,-9.920937,-1.931994\H,0,6.866952,-8.733185,-1.34221\F  
,0,5.830121,-11.701373,-6.125406\C,0,7.702223,-10.995565,-7.35399\F,0,  
9.57572,-10.282757,-8.584164\H,0,6.262328,-2.106211,-2.966104\C,0,7.56  
8011,-3.062778,-1.577105\H,0,8.851575,-4.24741,-0.354889\H,0,2.472008,  
-9.912892,-2.636997\C,0,2.617508,-8.353248,-1.172883\H,0,2.970511,-6.6  
77824,0.086255\H,0,10.140375,-9.72275,-4.882342\C,0,9.44753,-10.177323  
,-2.929819\H,0,8.592206,-10.470012,-0.999417\F,0,8.412341,-12.071688,-  
6.906798\H,0,7.826214,-2.138661,-1.07501\H,0,1.769573,-8.703701,-0.597  
422\H,0,10.205855,-10.934884,-2.774814\\Version=ES64L-G09RevE.01\HF=-3  
155.663414\RMSD=5.862e-09\Dipole=2.1485383,-1.8860354,6.3962018\Quadru  
pole=33.7910573,4.1589054,-37.9499627,-7.2816909,51.9832655,-40.609425  
3\PG=C01 [X(C72H30Au2F26P2)]\@

1\GINC-COMPUTE041\SP\RB3LYP\Gen\C72H30Au2F26P2\CRAT\17-Sep-2020\0\#\#  
p b3lyp/gen pseudo=read counterpoise=2 empiricaldispersion=gd3bj nosym  
m gfpriint\CystalExplorer Job symop = -x, -y, -z, r = 11.4335\0,1\C,  
0,0.646857,0.690313,4.643787\C,0,-0.289448,-0.110887,5.29309\H,0,0.362  
348,1.671908,4.285557\C,0,1.940134,0.237901,4.455999\H,0,-1.295551,0.2  
56179,5.453665\C,0,0.05887,-1.354789,5.724367\C,0,2.27384,-1.023049,4.  
896824\P,0,3.119179,1.326103,3.601402\H,0,-0.676865,-1.981443,6.213095  
\C,0,1.338807,-1.818717,5.544536\H,0,3.276515,-1.398855,4.734499\C,0,4  
.487348,0.199656,3.179673\Au,0,2.221456,2.414068,1.803565\C,0,3.724226  
,2.46836,4.860221\H,0,1.616944,-2.800786,5.906744\C,0,4.370838,-0.5220  
15,2.016339\C,0,5.59884,0.017405,3.999259\C,0,1.425201,3.420273,0.1877

89\C,0,4.044777,3.775149,4.483053\C,0,3.878666,2.089865,6.212935\H,0,3.52822,-0.348835,1.358284\C,0,5.318672,-1.460937,1.680548\C,0,6.544506,-0.933937,3.660285\H,0,5.720281,0.614896,4.894278\C,0,1.523154,2.865707,-1.107634\C,0,0.728777,4.638079,0.337383\H,0,3.945341,4.07722,3.447829\C,0,4.490199,4.684927,5.42677\H,0,3.630856,1.085734,6.534245\C,0,4.35471,3.027983,7.131189\H,0,5.217138,-2.023348,0.760703\C,0,6.399437,-1.691513,2.514457\H,0,7.406222,-1.08676,4.298129\C,0,0.99051,3.550285,-2.194579\C,0,2.100222,1.523253,-1.32566\C,0,0.472935,5.217031,1.685322\C,0,0.227739,5.279076,-0.775025\H,0,4.721585,5.697423,5.119943\C,0,4.642397,4.327659,6.741289\H,0,4.502676,2.737405,8.163867\H,0,7.124159,-2.458232,2.269854\F,0,1.072627,3.028912,-3.437485\C,0,0.374494,4.764704,-2.040211\C,0,1.290925,0.412258,-1.518222\C,0,3.475182,1.27802,-1.298605\C,0,-0.812592,5.196018,2.227999\C,0,1.461431,5.763367,2.473079\F,0,-0.438008,6.450929,-0.641346\H,0,4.984092,5.05336,7.469049\F,0,-0.11192,5.430765,-3.117608\C,0,1.784695,-0.855341,-1.653494\F,0,-0.045953,0.58478,-1.542094\F,0,4.31998,2.308739,-1.131505\C,0,3.993993,0.010647,-1.42592\F,0,-1.813887,4.661423,1.502308\C,0,-1.097406,5.716374,3.46613\C,0,1.205181,6.288127,3.731899\F,0,2.718475,5.851897,2.013156\F,0,0.981832,-1.901302,-1.850831\C,0,3.145651,-1.058009,-1.605751\F,0,5.321927,-0.183328,-1.371811\F,0,-2.345824,5.655281,3.951516\C,0,-0.084316,6.239904,4.215693\F,0,2.179548,6.835141,4.460773\F,0,3.656967,-2.290833,-1.71556\F,0,-0.342828,6.745131,5.43791\F,0,8.533373,0.183328,1.371811\C,0,9.861307,-0.010647,1.42592\C,0,10.380118,-1.27802,1.298605\C,0,10.709648,1.058009,1.605751\F,0,9.53532,-2.308739,1.131505\C,0,11.755077,-1.523254,1.32566\F,0,10.198332,2.290832,1.715559\C,0,12.070605,0.85534,1.653494\C,0,12.332146,-2.865707,1.107634\C,0,12.564376,-0.412258,1.518222\F,0,12.873467,1.901302,1.850831\C,0,12.430099,-3.420273,-0.187788\C,0,12.86479,-3.550285,2.194579\F,0,13.901253,-0.58478,1.542094\Au,0,11.633844,-2.414068,-1.803566\C,0,13.126523,-4.638079,-0.337383\F,0,12.782673,-3.028912,3.437485\C,0,13.480806,-4.764704,2.040211\P,0,10.736121,-1.326103,-3.601402\C,0,13.627561,-5.279075,0.775025\C,0,13.382364,-5.217031,-1.685322\F,0,13.967219,-5.430765,3.117608\C,0,9.367951,-0.199656,-3.179674\C,0,11.915167,-0.237901,-4.455998\C,0,10.131074,-2.46836,-4.860221\F,0,14.293308,-6.450929,0.641346\C,0,14.667892,-5.196017,-2.227999\C,0,12.393869,-5.763367,-2.473079\C,0,9.484463,0.522015,-2.016339\C,0,8.256461,-0.017405,-3.999259\C,0,13.208443,-0.690313,-4.643787\C,0,11.58146,1.023049,-4.896824\C,0,9.810523,-3.775149,-4.483053\C,0,9.976634,-2.089864,-6.212935\F,0,15.669188,-4.661422,-1.502308\C,0,14.952706,-5.716375,-3.466131\F,0,11.136826,-5.851897,-2.013157\C,0,12.65012,-6.288126,-3.731899\C,0,8.536629,1.460937,-1.680548\H,0,1.032708,0.348834,-1.358284\C,0,7.310794,0.933937,-3.660285\H,0,8.135018,-0.614897,-4.894278\H,0,13.492952,-1.671908,-4.285556\C,0,14.144749,0.110887,-5.29309\C,0,12.516493,1.818717,-5.544536\H,0,10.578785,1.398855,-4.734499\H,0,9.909959,-4.07722,-3.447829\C,0,9.365101,-4.684927,-5.42677\C,0,9.50059,-3.027983,-7.131189\H,0,10.224444,-1.085734,-6.534245\F,0,16.201124,-5.655281,-3.951516\C,0,13.93961,-6.239904,-4.215693\F,0,11.675752,-6.835142,-4.460773\C,0,7.455863,1.691512,-2.514456\H,0,8.638163,2.023348,-0.760703\H,0,6.449079,1.08676,-4.298129\H,0,15.150851,-0.256179,-5.453665\C,0,13.79643,1.354788,-5.724367\H,0,12.238356,2.800786,-5.906744\H,0,9.133715,-5.697423,-5.119943\C,0,9.212902,-4.327659,-6.74129\H,0,9.352624,-2.737405,-8.163867\F,0,14.198128,-6.745131,-5.43791\H,0,6.731141,2.458232,-2.269854\H,0,14.532166,1.981443,-6.213095\H,0,8.871208,-5.05336,-7.469049\Version=ES64L-G09RevE.01\HF=-315

5.6679175\RMSD=6.087e-09\Dipole=0.0000003,0.0000045,0.0000023\Quadrupole=-46.7769884,-12.7394356,59.516424,48.1001092,-37.5172444,4.494488\P  
G=C01 [X(C72H30Au2F26P2)]\ \@

1\1\GINC-COMPUTE021\SP\RB3LYP\Gen\C72H30Au2F26P2\CRAT\17-Sep-2020\0\#\#  
p b3lyp/gen pseudo=read counterpoise=2 empiricaldispersion=gd3bj nosym  
m gfpint\CystalExplorer Job symop = -, r = 12.1629\0,1\C,0,0.64685  
7,0.690313,4.643787\C,0,-0.289448,-0.110887,5.29309\H,0,0.362348,1.671  
908,4.285557\C,0,1.940134,0.237901,4.455999\H,0,-1.295551,0.256179,5.4  
53665\C,0,0.05887,-1.354789,5.724367\C,0,2.27384,-1.023049,4.896824\P,  
0,3.119179,1.326103,3.601402\H,0,-0.676865,-1.981443,6.213095\C,0,1.33  
8807,-1.818717,5.544536\H,0,3.276515,-1.398855,4.734499\C,0,4.487348,0  
.199656,3.179673\Au,0,2.221456,2.414068,1.803565\C,0,3.724226,2.46836,  
4.860221\H,0,1.616944,-2.800786,5.906744\C,0,4.370838,-0.522015,2.0163  
39\C,0,5.59884,0.017405,3.999259\C,0,1.425201,3.420273,0.187789\C,0,4.  
044777,3.775149,4.483053\C,0,3.878666,2.089865,6.212935\H,0,3.52822,-0  
.348835,1.358284\C,0,5.318672,-1.460937,1.680548\C,0,6.544506,-0.93393  
7,3.660285\H,0,5.720281,0.614896,4.894278\C,0,1.523154,2.865707,-1.107  
634\C,0,0.728777,4.638079,0.337383\H,0,3.945341,4.07722,3.447829\C,0,4  
.490199,4.684927,5.42677\H,0,3.630856,1.085734,6.534245\C,0,4.35471,3.  
027983,7.131189\H,0,5.217138,-2.023348,0.760703\C,0,6.399437,-1.691513  
,2.514457\H,0,7.406222,-1.08676,4.298129\C,0,0.99051,3.550285,-2.19457  
9\C,0,2.100222,1.523253,-1.32566\C,0,0.472935,5.217031,1.685322\C,0,0.  
227739,5.279076,-0.775025\H,0,4.721585,5.697423,5.119943\C,0,4.642397,  
4.327659,6.741289\H,0,4.502676,2.737405,8.163867\H,0,7.124159,-2.45823  
2,2.269854\F,0,1.072627,3.028912,-3.437485\C,0,0.374494,4.764704,-2.04  
0211\C,0,1.290925,0.412258,-1.518222\C,0,3.475182,1.27802,-1.298605\C,  
0,-0.812592,5.196018,2.227999\C,0,1.461431,5.763367,2.473079\F,0,-0.43  
8008,6.450929,-0.641346\H,0,4.984092,5.05336,7.469049\F,0,-0.11192,5.4  
30765,-3.117608\C,0,1.784695,-0.855341,-1.653494\F,0,-0.045953,0.58478  
, -1.542094\F,0,4.31998,2.308739,-1.131505\C,0,3.993993,0.010647,-1.425  
92\F,0,-1.813887,4.661423,1.502308\C,0,-1.097406,5.716374,3.46613\C,0,  
1.205181,6.288127,3.731899\F,0,2.718475,5.851897,2.013156\F,0,0.981832  
, -1.901302,-1.850831\C,0,3.145651,-1.058009,-1.605751\F,0,5.321927,-0.  
183328,-1.371811\F,0,-2.345824,5.655281,3.951516\C,0,-0.08431,6.239904  
,4.215693\F,0,2.179548,6.835141,4.460773\F,0,3.656967,-2.290833,-1.715  
56\F,0,-0.342828,6.745131,5.43791\F,0,6.811993,-2.976474,6.125407\C,0,  
6.239414,-3.857842,6.949766\C,0,4.93989,-3.682282,7.353989\C,0,6.93943  
2,-4.95361,7.408098\F,0,4.229773,-2.60616,6.906798\C,0,4.339484,-4.570  
989,8.199038\F,0,8.204977,-5.085702,7.015015\C,0,6.368484,-5.883304,8.  
267469\F,0,3.066394,-4.395091,8.584163\C,0,5.073182,-5.658628,8.633497  
\C,0,7.125809,-7.089382,8.717843\F,0,4.457607,-6.509964,9.481729\C,0,7  
.417817,-8.113535,7.809138\C,0,7.558637,-7.176238,10.033955\Au,0,6.887  
958,-7.973574,5.825263\C,0,8.140725,-9.233128,8.286566\F,0,7.295219,-6  
.172971,10.899691\C,0,8.28341,-8.258457,10.473188\P,0,6.377839,-7.7198  
99,3.610155\C,0,8.567859,-9.271546,9.602677\C,0,8.472592,-10.369622,7.  
360355\F,0,8.71689,-8.322618,11.751104\C,0,7.79891,-7.201579,2.617899\  
C,0,5.120335,-6.427169,3.311762\C,0,5.793384,-9.243949,2.800913\F,0,9.  
270789,-10.332088,10.061008\C,0,9.728885,-10.501144,6.790624\C,0,7.535  
871,-11.30448,7.022972\C,0,8.524575,-6.080991,3.034853\C,0,8.224505,-7  
.879442,1.487985\C,0,4.208781,-6.143233,4.328685\C,0,5.060951,-5.73095  
9,2.127739\C,0,6.317454,-10.455898,3.251288\C,0,4.867984,-9.244715,1.7  
69668\F,0,10.690562,-9.630192,7.131189\C,0,9.97501,-11.490748,5.858047

\F,0,6.322643,-11.263283,7.575198\C,0,7.784147,-12.295665,6.096761\H,0,8.22613,-5.551221,3.930986\C,0,9.623628,-5.641768,2.312345\C,0,9.340499,-7.4453,0.782983\H,0,7.684235,-8.756289,1.15283\C,0,3.229894,-5.172458,4.110659\H,0,4.259336,-6.671015,5.273037\C,0,4.093094,-4.75691,1.931994\H,0,5.775161,-5.944662,1.34221\H,0,7.004815,-10.471567,4.08806\C,0,5.96053,-11.632257,2.627448\C,0,4.513061,-10.432364,1.161742\H,0,4.424857,-8.313025,1.440402\F,0,11.189091,-11.541317,5.275584\C,0,9.009382,-12.380895,5.503159\F,0,6.819795,-13.16052,5.743464\H,0,10.170105,-4.764955,2.636997\C,0,10.024606,-6.324599,1.172883\H,0,9.671603,-8.00023,-0.086256\H,0,2.501739,-4.955097,4.882342\C,0,3.194585,-4.500523,2.929819\H,0,4.049907,-4.207835,0.999417\H,0,6.379786,-12.571635,2.966104\C,0,5.074103,-11.615069,1.577105\H,0,3.790539,-10.430436,0.354888\F,0,9.258961,-13.306028,4.576947\H,0,10.87254,-5.974146,0.597422\H,0,2.436258,-3.742962,2.774814\H,0,4.815899,-12.539186,1.07501\\Version=ES64L-G09RevE.01\HF=-3155.6634126\RMSD=5.862e-09\Dipole=0.8838859,-1.4148097,-0.5261288\Quadrupole=16.7938356,5.1141421,-21.9079777,18.6468065,-30.9960819,57.4344442\PG=C01 [X(C72H30Au2F26P2)]\@

1\1\GINC-COMPUTE008\SP\RB3LYP\Gen\C72H30Au2F26P2\CRAT\17-Sep-2020\0\#\#  
p b3lyp/gen pseudo=read counterpoise=2 empiricaldispersion=gd3bj nosym  
m gfpint\CystalExplorer Job symop = -, r = 13.9482\0,1\C,0,0.64685  
7,0.690313,4.643787\C,0,-0.289448,-0.110887,5.29309\H,0,0.362348,1.671908,4.285557\C,0,1.940134,0.237901,4.455999\H,0,-1.295551,0.256179,5.453665\C,0,0.05887,-1.354789,5.724367\C,0,2.27384,-1.023049,4.896824\P,0,3.119179,1.326103,3.601402\H,0,-0.676865,-1.981443,6.213095\C,0,1.338807,-1.818717,5.544536\H,0,3.276515,-1.398855,4.734499\C,0,4.487348,0.199656,3.179673\Au,0,2.221456,2.414068,1.803565\C,0,3.724226,2.46836,4.860221\H,0,1.616944,-2.800786,5.906744\C,0,4.370838,-0.522015,2.016339\C,0,5.59884,0.017405,3.999259\C,0,1.425201,3.420273,0.187789\C,0,4.044777,3.775149,4.483053\C,0,3.878666,2.089865,6.212935\H,0,3.52822,-0.348835,1.358284\C,0,5.318672,-1.460937,1.680548\C,0,6.544506,-0.933937,3.660285\H,0,5.720281,0.614896,4.894278\C,0,1.523154,2.865707,-1.107634\C,0,0.728777,4.638079,0.337383\H,0,3.945341,4.07722,3.447829\C,0,4.490199,4.684927,5.42677\H,0,3.630856,1.085734,6.534245\C,0,4.35471,3.027983,7.131189\H,0,5.217138,-2.023348,0.760703\C,0,6.399437,-1.691513,2.514457\H,0,7.406222,-1.08676,4.298129\C,0,0.99051,3.550285,-2.194579\C,0,2.100222,1.523253,-1.32566\C,0,0.472935,5.217031,1.685322\C,0,0.227739,5.279076,-0.775025\H,0,4.721585,5.697423,5.119943\C,0,4.642397,4.327659,6.741289\H,0,4.502676,2.737405,8.163867\H,0,7.124159,-2.458232,2.269854\F,0,1.072627,3.028912,-3.437485\C,0,0.374494,4.764704,-2.040211\C,0,1.290925,0.412258,-1.518222\C,0,3.475182,1.27802,-1.298605\C,0,-0.812592,5.196018,2.227999\C,0,1.461431,5.763367,2.473079\F,0,-0.438008,6.450929,-0.641346\H,0,4.984092,5.05336,7.469049\F,0,-0.11192,5.430765,-3.117608\C,0,1.784695,-0.855341,-1.653494\F,0,-0.045953,0.58478,-1.542094\F,0,4.31998,2.308739,-1.131505\C,0,3.993993,0.010647,-1.42592\F,0,-1.813887,4.661423,1.502308\C,0,-1.097406,5.716374,3.46613\C,0,1.205181,6.288127,3.731899\F,0,2.718475,5.851897,2.013156\F,0,0.981832,-1.901302,-1.850831\C,0,3.145651,-1.058009,-1.605751\F,0,5.321927,-0.183328,-1.371811\F,0,-2.345824,5.655281,3.951516\C,0,-0.08431,6.239904,4.215693\F,0,2.179548,6.835141,4.460773\F,0,3.656967,-2.290833,-1.71556\F,0,-0.342828,6.745131,5.43791\F,0,9.357123,-0.958941,5.853272\C,0,10.060053,-2.019483,6.311604\C,0,10.344501,-3.032573,5.441092\C,0,10.487186,-2.057903,7.627715\F,0,9.911021,-2.968411,4.163176\C,0,11.069274

,-4.114792,5.880327\C,0,11.210094,-3.177495,8.105144\C,0,10.155318,-0.921408,8.553926\F,0,11.332692,-5.118059,5.01459\C,0,11.502103,-4.201649,7.196438\Au,0,11.739953,-3.317456,10.089018\C,0,8.899027,-0.789885,9.123657\C,0,11.092041,0.01345,8.891309\C,0,12.259428,-5.407727,7.646812\P,0,12.250073,-3.571131,12.304127\F,0,7.93735,-1.660837,8.783092\C,0,8.652902,0.199718,10.056234\F,0,12.305268,-0.027747,8.339083\C,0,10.843764,1.004635,9.81752\C,0,11.688479,-6.337419,8.506184\C,0,13.554729,-5.632402,7.280784\C,0,10.829001,-4.089452,13.296382\C,0,13.507576,-4.863861,12.602519\C,0,12.834527,-2.047081,13.113367\F,0,7.43882,0.250287,10.638697\C,0,9.618529,1.089865,10.411123\F,0,11.808116,1.86949,10.170817\F,0,10.422935,-6.205328,8.899265\C,0,12.388497,-7.433188,8.964515\F,0,14.170304,-4.781067,6.432552\C,0,14.288427,-6.72004,7.715243\C,0,10.103336,-5.210039,12.879428\C,0,10.403406,-3.411588,14.426295\C,0,14.41913,-5.147797,11.585596\C,0,13.56696,-5.560071,13.786541\C,0,12.310457,-0.835131,12.662993\C,0,13.759928,-2.046315,14.144613\F,0,9.36895,2.014998,11.337334\F,0,11.815918,-8.314556,9.788875\C,0,13.688021,-7.608748,8.560291\F,0,15.561518,-6.89594,7.330118\H,0,10.401782,-5.739809,11.983294\C,0,9.004283,-5.649262,13.601936\C,0,9.287413,-3.84573,15.131298\H,0,10.943676,-2.534741,14.76145\H,0,14.368575,-4.620015,10.641243\C,0,15.398018,-6.118572,11.803622\C,0,14.534817,-6.53412,13.982287\H,0,12.85275,-5.346368,14.572071\H,0,11.623096,-0.819463,11.826221\C,0,12.667382,0.341227,13.286834\C,0,14.11485,-0.858667,14.752538\H,0,14.203054,-2.978005,14.473879\F,0,14.398139,-8.684871,9.007483\H,0,8.457806,-6.526075,13.277285\C,0,8.603306,-4.966431,14.741398\H,0,8.956308,-3.291007,16.000536\H,0,16.126173,-6.335932,11.031939\C,0,15.433328,-6.790506,12.984462\H,0,14.578004,-7.083195,14.914865\H,0,12.248125,1.280605,12.948176\C,0,13.553808,0.324039,14.337175\H,0,14.837373,-0.860593,15.559392\H,0,7.755371,-5.316884,15.316858\H,0,16.191654,-7.548068,13.139467\H,0,13.812012,1.248156,14.839272\\Version=ES64L-G09RevE.01\HF=-3155.6634201\RMSD=5.862e-09\Dipole=2.7525297,-2.2707619,6.7634071\Quadrupole=-17.4357024,-81.991792,99.4274944,-12.3924567,125.5422364,-32.5401913\PG=C01 [X(C72H30Au2F26P2)]\@\

1\1\GINC-COMPUTE025\SP\RB3LYP\def2TZVP\C72H30Au2F26P2\CRAT\08-Oct-2020  
\0\#p b3lyp/def2tzvp counterpoise=2 empiricaldispersion=gd3bj nosymm  
gfprint\\CrystalExplorer Job symop = -, r = 11.8152\\0,1\C,0,0.646857,  
0.690313,4.643787\C,0,-0.289448,-0.110887,5.29309\H,0,0.362348,1.67190  
8,4.285557\C,0,1.940134,0.237901,4.455999\H,0,-1.295551,0.256179,5.453  
665\C,0,0.05887,-1.354789,5.724367\C,0,2.27384,-1.023049,4.896824\P,0,  
3.119179,1.326103,3.601402\H,0,-0.676865,-1.981443,6.213095\C,0,1.3388  
07,-1.818717,5.544536\H,0,3.276515,-1.398855,4.734499\C,0,4.487348,0.1  
99656,3.179673\Au,0,2.221456,2.414068,1.803565\C,0,3.724226,2.46836,4.  
860221\H,0,1.616944,-2.800786,5.906744\C,0,4.370838,-0.522015,2.016339  
\C,0,5.59884,0.017405,3.999259\C,0,1.425201,3.420273,0.187789\C,0,4.04  
4777,3.775149,4.483053\C,0,3.878666,2.089865,6.212935\H,0,3.52822,-0.3  
48835,1.358284\C,0,5.318672,-1.460937,1.680548\C,0,6.544506,-0.933937,  
3.660285\H,0,5.720281,0.614896,4.894278\C,0,1.523154,2.865707,-1.10763  
4\C,0,0.728777,4.638079,0.337383\H,0,3.945341,4.07722,3.447829\C,0,4.4  
90199,4.684927,5.42677\H,0,3.630856,1.085734,6.534245\C,0,4.35471,3.02  
7983,7.131189\H,0,5.217138,-2.023348,0.760703\C,0,6.399437,-1.691513,2  
.514457\H,0,7.406222,-1.08676,4.298129\C,0,0.99051,3.550285,-2.194579\  
C,0,2.100222,1.523253,-1.32566\C,0,0.472935,5.217031,1.685322\C,0,0.22  
7739,5.279076,-0.775025\H,0,4.721585,5.697423,5.119943\C,0,4.642397,4.

327659,6.741289\H,0,4.502676,2.737405,8.163867\H,0,7.124159,-2.458232,  
2.269854\F,0,1.072627,3.028912,-3.437485\C,0,0.374494,4.764704,-2.0402  
11\C,0,1.290925,0.412258,-1.518222\C,0,3.475182,1.27802,-1.298605\C,0,  
-0.812592,5.196018,2.227999\C,0,1.461431,5.763367,2.473079\F,0,-0.4380  
08,6.450929,-0.641346\H,0,4.984092,5.05336,7.469049\F,0,-0.11192,5.430  
765,-3.117608\C,0,1.784695,-0.855341,-1.653494\F,0,-0.045953,0.58478,-  
1.542094\F,0,4.31998,2.308739,-1.131505\C,0,3.993993,0.010647,-1.42592  
\F,0,-1.813887,4.661423,1.502308\C,0,-1.097406,5.716374,3.46613\C,0,1.  
205181,6.288127,3.731899\F,0,2.718475,5.851897,2.013156\F,0,0.981832,-  
1.901302,-1.850831\C,0,3.145651,-1.058009,-1.605751\F,0,5.321927,-0.18  
3328,-1.371811\F,0,-2.345824,5.655281,3.951516\C,0,-0.08431,6.239904,4  
.215693\F,0,2.179548,6.835141,4.460773\F,0,3.656967,-2.290833,-1.71556  
\F,0,-0.342828,6.745131,5.43791\F,0,-0.315004,4.781066,-6.432553\C,0,0  
.30057,5.632402,-7.280783\C,0,1.595873,5.407726,-7.646811\C,0,-0.43312  
7,6.720041,-7.715243\C,0,2.353197,4.201648,-7.196438\C,0,2.166821,6.33  
742,-8.506184\F,0,-1.706217,6.895939,-7.330118\C,0,0.167279,7.608747,-  
8.560291\C,0,2.786026,4.114792,-5.880326\C,0,2.645205,3.177495,-8.1051  
44\F,0,3.432366,6.205328,-8.899265\C,0,1.466802,7.433187,-8.964515\F,0  
,-0.542839,8.684871,-9.007483\F,0,2.522608,5.118059,-5.01459\C,0,3.510  
799,3.032573,-5.441092\C,0,3.368114,2.057903,-7.627715\Au,0,2.115347,3  
.317456,-10.089018\F,0,2.039382,8.314556,-9.788874\F,0,3.944279,2.9684  
11,-4.163176\C,0,3.795247,2.019483,-6.311604\C,0,3.699981,0.921408,-8.  
553926\p,0,1.605227,3.571131,-12.304126\F,0,4.498178,0.958941,-5.85327  
2\C,0,4.956273,0.789885,-9.123657\C,0,2.763259,-0.01345,-8.891309\C,0,  
3.026299,4.089451,-13.296382\C,0,0.347724,4.863861,-12.602519\C,0,1.02  
0773,2.047081,-13.113367\F,0,5.917951,1.660838,-8.783092\C,0,5.202398,  
-0.199718,-10.056234\F,0,1.550032,0.027748,-8.339083\C,0,3.011536,-1.0  
04634,-9.81752\C,0,3.751964,5.210039,-12.879428\C,0,3.451894,3.411587,  
-14.426295\C,0,-0.56383,5.147797,-11.585596\C,0,0.288339,5.560071,-13.  
786542\C,0,1.544843,0.835132,-12.662993\C,0,0.095372,2.046315,-14.1446  
13\F,0,6.41648,-0.250287,-10.638697\C,0,4.236771,-1.089865,-10.411122\  
F,0,2.047184,-1.86949,-10.170816\H,0,3.453518,5.739809,-11.983294\C,0,  
4.851017,5.649262,-13.601935\C,0,4.567887,3.84573,-15.131298\H,0,2.911  
623,2.534741,-14.761451\H,0,-0.513276,4.620015,-10.641243\C,0,-1.54271  
7,6.118572,-11.803622\C,0,-0.679518,6.53412,-13.982287\H,0,1.00255,5.3  
46368,-14.57207\H,0,2.232203,0.819463,-11.826221\C,0,1.187919,-0.34122  
6,-13.286833\C,0,-0.259551,0.858666,-14.752539\H,0,-0.347755,2.978005,  
-14.473879\F,0,4.48635,-2.014999,-11.337334\H,0,5.397494,6.526075,-13.  
277285\C,0,5.251994,4.966431,-14.741399\H,0,4.898992,3.291007,-16.0005  
36\H,0,-2.270873,6.335933,-11.031939\C,0,-1.578027,6.790507,-12.984462  
\H,0,-0.722705,7.083195,-14.914865\H,0,1.607174,-1.280605,-12.948177\C  
,0,0.301491,-0.324039,-14.337175\H,0,-0.982072,0.860593,-15.559392\H,0  
,6.099929,5.316884,-15.316859\H,0,-2.336353,7.548068,-13.139467\H,0,0.  
043288,-1.248156,-14.839272\\Version=ES64L-G09RevE.01\HF=-3157.1847461  
\RMSD=6.289e-09\Dipole=0.757681,-1.2446865,-0.7273148\Quadrupole=-48.2  
792646,-62.5322972,110.8115617,3.0128048,24.6257322,-31.195183\PG=C01  
[X(C72H30Au2F26P2)]\@

1\1\GINC-COMPUTE041\SP\RB3LYP\Gen\C72H30Au2F26P2\CRAT\17-Sep-2020\0\#\#  
p b3lyp/gen pseudo=read counterpoise=2 empiricaldispersion=gd3bj nosym  
m gfpint\\CrystalExplorer Job symop = -, r = 10.5873\\0,1\C,0,0.64685  
7,0.690313,4.643787\C,0,-0.289448,-0.110887,5.29309\H,0,0.362348,1.671  
908,4.285557\C,0,1.940134,0.237901,4.455999\H,0,-1.295551,0.256179,5.4



53665\C,0,0.05887,-1.354789,5.724367\C,0,2.27384,-1.023049,4.896824\P,  
0,3.119179,1.326103,3.601402\H,0,-0.676865,-1.981443,6.213095\C,0,1.33  
8807,-1.818717,5.544536\H,0,3.276515,-1.398855,4.734499\C,0,4.487348,0  
.199656,3.179673\Au,0,2.221456,2.414068,1.803565\C,0,3.724226,2.46836,  
4.860221\H,0,1.616944,-2.800786,5.906744\C,0,4.370838,-0.522015,2.0163  
39\C,0,5.59884,0.017405,3.999259\C,0,1.425201,3.420273,0.187789\C,0,4.  
044777,3.775149,4.483053\C,0,3.878666,2.089865,6.212935\H,0,3.52822,-0  
.348835,1.358284\C,0,5.318672,-1.460937,1.680548\C,0,6.544506,-0.93393  
7,3.660285\H,0,5.720281,0.614896,4.894278\C,0,1.523154,2.865707,-1.107  
634\C,0,0.728777,4.638079,0.337383\H,0,3.945341,4.07722,3.447829\C,0,4  
.490199,4.684927,5.42677\H,0,3.630856,1.085734,6.534245\C,0,4.35471,3.  
027983,7.131189\H,0,5.217138,-2.023348,0.760703\C,0,6.399437,-1.691513  
,2.514457\H,0,7.406222,-1.08676,4.298129\C,0,0.99051,3.550285,-2.19457  
9\C,0,2.100222,1.523253,-1.32566\C,0,0.472935,5.217031,1.685322\C,0,0.  
227739,5.279076,-0.775025\H,0,4.721585,5.697423,5.119943\C,0,4.642397,  
4.327659,6.741289\H,0,4.502676,2.737405,8.163867\H,0,7.124159,-2.45823  
2,2.269854\F,0,1.072627,3.028912,-3.437485\C,0,0.374494,4.764704,-2.04  
0211\C,0,1.290925,0.412258,-1.518222\C,0,3.475182,1.27802,-1.298605\C,  
0,-0.812592,5.196018,2.227999\C,0,1.461431,5.763367,2.473079\F,0,-0.43  
8008,6.450929,-0.641346\H,0,4.984092,5.05336,7.469049\F,0,-0.11192,5.4  
30765,-3.117608\C,0,1.784695,-0.855341,-1.653494\F,0,-0.045953,0.58478  
,-1.542094\F,0,4.31998,2.308739,-1.131505\C,0,3.993993,0.010647,-1.425  
92\F,0,-1.813887,4.661423,1.502308\C,0,-1.097406,5.716374,3.46613\C,0,  
1.205181,6.288127,3.731899\F,0,2.718475,5.851897,2.013156\F,0,0.981832  
,-1.901302,-1.850831\C,0,3.145651,-1.058009,-1.605751\F,0,5.321927,-0.  
183328,-1.371811\F,0,-2.345824,5.655281,3.951516\C,0,-0.08431,6.239904  
,4.215693\F,0,2.179548,6.835141,4.460773\F,0,3.656967,-2.290833,-1.715  
56\F,0,-0.342828,6.745131,5.43791\C,0,4.231672,5.641768,-2.312345\H,0,  
3.685194,4.764955,-2.636997\C,0,3.830694,6.324599,-1.172883\C,0,5.3307  
25,6.080991,-3.034853\H,0,2.982759,5.974146,-0.597422\C,0,4.514801,7.4  
453,-0.782983\C,0,6.05639,7.201578,-2.617899\H,0,5.62917,5.551221,-3.9  
30986\H,0,4.183697,8.000023,0.086255\C,0,5.630795,7.879442,-1.487986\P  
,0,7.477462,7.7199,-3.610154\H,0,6.171065,8.756289,-1.152831\Au,0,6.96  
7342,7.973574,-5.825263\C,0,8.734965,6.427169,-3.311762\C,0,8.061915,9  
.243949,-2.800913\C,0,6.437483,8.113535,-7.809138\C,0,9.646519,6.14323  
3,-4.328685\C,0,8.794349,5.730959,-2.12774\C,0,7.537846,10.455898,-3.2  
51287\C,0,8.987316,9.244715,-1.769668\C,0,5.714575,9.233127,-8.286566\  
C,0,6.729492,7.089381,-8.717843\H,0,9.595964,6.671015,-5.273038\C,0,10  
.625406,5.172458,-4.110659\C,0,9.762206,4.75691,-1.931994\H,0,8.080138  
,5.944662,-1.34221\H,0,6.850485,10.471567,-4.08806\C,0,7.894771,11.632  
257,-2.627447\C,0,9.342239,10.432364,-1.161743\H,0,9.430443,8.313025,-  
1.440402\C,0,5.287442,9.271547,-9.602677\C,0,5.382707,10.369622,-7.360  
354\C,0,6.296663,7.176238,-10.033954\C,0,7.486816,5.883303,-8.267468\H  
,0,11.353561,4.955098,-4.882342\C,0,10.660716,4.500524,-2.929819\H,0,9  
.805393,4.207835,-0.999417\H,0,7.475514,12.571635,-2.966104\C,0,8.7811  
98,11.615069,-1.577105\H,0,10.064761,10.430436,-0.354889\F,0,4.584512,  
10.332088,-10.061008\C,0,5.57189,8.258457,-10.473188\C,0,4.126415,10.5  
01144,-6.790624\C,0,6.319429,11.30448,-7.022972\F,0,6.560081,6.172971,  
-10.899691\C,0,6.915868,4.953611,-7.408098\C,0,8.782118,5.658628,-8.63  
3497\H,0,11.419042,3.742962,-2.774814\H,0,9.0394,12.539186,-1.07501\F,  
0,5.13841,8.322618,-11.751105\F,0,3.164739,9.630193,-7.131189\C,0,3.88  
0291,11.490748,-5.858047\F,0,7.532657,11.263283,-7.575198\C,0,6.071153  
,12.295665,-6.096761\F,0,5.650323,5.085702,-7.015015\C,0,7.615886,3.85

7842,-6.949766\F,0,9.397693,6.509963,-9.481729\C,0,9.515816,4.57099,-8  
.199038\F,0,2.666209,11.541317,-5.275584\C,0,4.845918,12.380896,-5.503  
158\F,0,7.035505,13.16052,-5.743464\F,0,7.043307,2.976474,-6.125406\C,  
0,8.915409,3.682282,-7.35399\F,0,10.788906,4.39509,-8.584164\F,0,4.596  
339,13.306028,-4.576947\F,0,9.625527,2.60616,-6.906798\\Version=ES64L-  
G09RevE.01\HF=-3155.6634141\RMSD=5.862e-09\Dipole=1.9890747,-2.3449293  
,6.7103265\Quadrupole=43.1949542,-11.8016188,-31.3933354,5.3648879,63.  
6991125,60.4498576\PG=C01 [X(C72H30Au2F26P2)]\@\@

1\1\GINC-COMPUTE021\SP\RB3LYP\Gen\C72H30Au2F26P2\CRAT\17-Sep-2020\0\#\#  
p b3lyp/gen pseudo=read counterpoise=2 empiricaldispersion=gd3bj nosym  
m gfprint\CystalExplorer Job symop = -, r = 8.58411\0,1\C,0,0.64685  
7,0.690313,4.643787\C,0,-0.289448,-0.110887,5.29309\H,0,0.362348,1.671  
908,4.285557\C,0,1.940134,0.237901,4.455999\H,0,-1.295551,0.256179,5.4  
53665\C,0,0.05887,-1.354789,5.724367\C,0,2.27384,-1.023049,4.896824\P,  
0,3.119179,1.326103,3.601402\H,0,-0.676865,-1.981443,6.213095\C,0,1.33  
8807,-1.818717,5.544536\H,0,3.276515,-1.398855,4.734499\C,0,4.487348,0  
.199656,3.179673\Au,0,2.221456,2.414068,1.803565\C,0,3.724226,2.46836,  
4.860221\H,0,1.616944,-2.800786,5.906744\C,0,4.370838,-0.522015,2.0163  
39\C,0,5.59884,0.017405,3.999259\C,0,1.425201,3.420273,0.187789\C,0,4.  
044777,3.775149,4.483053\C,0,3.878666,2.089865,6.212935\H,0,3.52822,-0  
.348835,1.358284\C,0,5.318672,-1.460937,1.680548\C,0,6.544506,-0.93393  
7,3.660285\H,0,5.720281,0.614896,4.894278\C,0,1.523154,2.865707,-1.107  
634\C,0,0.728777,4.638079,0.337383\H,0,3.945341,4.07722,3.447829\C,0,4  
.490199,4.684927,5.42677\H,0,3.630856,1.085734,6.534245\C,0,4.35471,3.  
027983,7.131189\H,0,5.217138,-2.023348,0.760703\C,0,6.399437,-1.691513  
,2.514457\H,0,7.406222,-1.08676,4.298129\C,0,0.99051,3.550285,-2.19457  
9\C,0,2.100222,1.523253,-1.32566\C,0,0.472935,5.217031,1.685322\C,0,0.  
227739,5.279076,-0.775025\H,0,4.721585,5.697423,5.119943\C,0,4.642397,  
4.327659,6.741289\H,0,4.502676,2.737405,8.163867\H,0,7.124159,-2.45823  
2,2.269854\F,0,1.072627,3.028912,-3.437485\C,0,0.374494,4.764704,-2.04  
0211\C,0,1.290925,0.412258,-1.518222\C,0,3.475182,1.27802,-1.298605\C,  
0,-0.812592,5.196018,2.227999\C,0,1.461431,5.763367,2.473079\F,0,-0.43  
8008,6.450929,-0.641346\H,0,4.984092,5.05336,7.469049\F,0,-0.11192,5.4  
30765,-3.117608\C,0,1.784695,-0.855341,-1.653494\F,0,-0.045953,0.58478  
, -1.542094\F,0,4.31998,2.308739,-1.131505\C,0,3.993993,0.010647,-1.425  
92\F,0,-1.813887,4.661423,1.502308\C,0,-1.097406,5.716374,3.46613\C,0,  
1.205181,6.288127,3.731899\F,0,2.718475,5.851897,2.013156\F,0,0.981832  
, -1.901302,-1.850831\C,0,3.145651,-1.058009,-1.605751\F,0,5.321927,-0.  
183328,-1.371811\F,0,-2.345824,5.655281,3.951516\C,0,-0.08431,6.239904  
,4.215693\F,0,2.179548,6.835141,4.460773\F,0,3.656967,-2.290833,-1.715  
56\F,0,-0.342828,6.745131,5.43791\Au,0,8.101145,6.704273,5.825263\P,0,  
7.591025,6.957948,3.610155\C,0,8.631003,6.564312,7.809138\C,0,6.333521  
,8.250678,3.311762\C,0,7.006571,5.433898,2.800913\C,0,9.012096,7.47626  
8,2.617899\C,0,9.353911,5.44472,8.286566\C,0,8.338995,7.588465,8.71784  
3\C,0,5.421968,8.534614,4.328685\C,0,6.274137,8.946888,2.127739\C,0,7.  
530641,4.221949,3.251288\C,0,6.08117,5.433132,1.769668\C,0,9.737761,8.  
596856,3.034853\C,0,9.437692,6.798405,1.487985\C,0,9.685779,4.308225,7  
.360355\C,0,9.781045,5.4063,9.602677\C,0,7.581671,8.794543,8.267469\C,  
0,8.771824,7.501609,10.033955\H,0,5.472522,8.006832,5.273037\C,0,4.443  
08,9.505389,4.110659\C,0,5.30628,9.920937,1.931994\H,0,6.988348,8.7331  
85,1.34221\C,0,7.173717,3.045591,2.627448\H,0,8.218001,4.20628,4.08806  
\C,0,5.726247,4.245483,1.161742\H,0,5.638043,6.364822,1.440402\H,0,9.4

39317,9.126626,3.930986\C,0,10.836815,9.036078,2.312345\C,0,10.553685,  
7.232547,0.782983\H,0,8.897421,5.921558,1.15283\C,0,8.749058,3.373367,  
7.022972\C,0,10.942071,4.176702,6.790624\F,0,10.483975,4.345758,10.061  
008\C,0,9.496596,6.419389,10.473188\C,0,6.286368,9.019219,8.633497\C,0  
,8.152618,9.724236,7.408098\F,0,8.508406,8.504876,10.899691\H,0,3.7149  
25,9.72275,4.882342\C,0,4.407771,10.177323,2.929819\H,0,5.263093,10.47  
0012,0.999417\H,0,7.592972,2.106212,2.966104\C,0,6.28729,3.062778,1.57  
7105\H,0,5.003726,4.24741,0.354888\H,0,11.383292,9.912892,2.636997\C,0  
,11.237792,8.353248,1.172883\H,0,10.884789,6.677824,-0.086256\F,0,7.53  
583,3.414565,7.575198\C,0,8.997334,2.382182,6.096761\C,0,11.188196,3.1  
87099,5.858047\F,0,11.903749,5.047655,7.131189\F,0,9.930077,6.355228,1  
1.751104\F,0,5.670794,8.167883,9.481729\C,0,5.55267,10.106857,8.199038  
\F,0,9.418163,9.592145,7.015015\C,0,7.4526,10.820004,6.949766\H,0,3.64  
9445,10.934885,2.774814\H,0,6.029086,2.138661,1.07501\H,0,12.085727,8.  
703701,0.597422\F,0,8.032982,1.517327,5.743464\C,0,10.222569,2.296952,  
5.503159\F,0,12.402278,3.13653,5.275584\F,0,4.279581,10.282757,8.58416  
3\C,0,6.153077,10.995564,7.353989\F,0,8.02518,11.701373,6.125407\F,0,1  
0.472147,1.371818,4.576947\F,0,5.442959,12.071688,6.906798\\Version=ES  
64L-G09RevE.01\HF=-3155.6633879\RMSD=5.862e-09\Dipole=0.7410869,-1.243  
5517,-0.6480546\Quadrupole=7.9289944,19.3443737,-27.2733681,0.9141769,  
-41.7258723,-41.2325775\PG=C01 [X(C72H30Au2F26P2)]\@

1\1\GINC-COMPUTE008\SP\RB3LYP\Gen\C72H30Au2F26P2\CRAT\17-Sep-2020\0\#\#  
p b3lyp/gen pseudo=read counterpoise=2 empiricaldispersion=gd3bj nosym  
m gfpint\CrystalExplorer Job symop = -, r = 12.5273\0,1\H,0,10.8847  
89,6.677824,-0.086256\C,0,10.553685,7.232547,0.782983\C,0,11.237792,8.  
353248,1.172883\C,0,9.437692,6.798405,1.487985\C,0,10.836815,9.036078,  
2.312345\H,0,12.085727,8.703701,0.597422\C,0,9.012096,7.476268,2.61789  
9\H,0,8.897421,5.921558,1.15283\C,0,9.737761,8.596856,3.034853\H,0,11.  
383292,9.912892,2.636997\P,0,7.591025,6.957948,3.610155\H,0,9.439317,9  
.126626,3.930986\Au,0,8.101145,6.704273,5.825263\C,0,6.333521,8.250678  
,3.311762\C,0,7.006571,5.433898,2.800913\C,0,8.631003,6.564312,7.80913  
8\C,0,5.421968,8.534614,4.328685\C,0,6.274137,8.946888,2.127739\C,0,7.  
530641,4.221949,3.251288\C,0,6.08117,5.433132,1.769668\C,0,9.353911,5.  
44472,8.286566\C,0,8.338995,7.588465,8.717843\H,0,5.472522,8.006832,5.  
273037\C,0,4.44308,9.505389,4.110659\C,0,5.30628,9.920937,1.931994\H,0  
,6.988348,8.733185,1.34221\H,0,8.218001,4.20628,4.08806\C,0,7.173717,3  
.045591,2.627448\C,0,5.726247,4.245483,1.161742\H,0,5.638043,6.364822,  
1.440402\C,0,9.781045,5.4063,9.602677\C,0,9.685779,4.308225,7.360355\C  
,0,8.771824,7.501609,10.033955\C,0,7.581671,8.794543,8.267469\H,0,3.71  
4925,9.72275,4.882342\C,0,4.407771,10.177323,2.929819\H,0,5.263093,10.  
470012,0.999417\H,0,7.592972,2.106212,2.966104\C,0,6.28729,3.062778,1.  
577105\H,0,5.003726,4.24741,0.354888\F,0,10.483975,4.345758,10.061008\  
C,0,9.496596,6.419389,10.473188\C,0,10.942071,4.176702,6.790624\C,0,8.  
749058,3.373367,7.022972\F,0,8.508406,8.504876,10.899691\C,0,8.152618,  
9.724236,7.408098\C,0,6.286368,9.019219,8.633497\H,0,3.649445,10.93488  
5,2.774814\H,0,6.029086,2.138661,1.07501\F,0,9.930077,6.355228,11.7511  
04\F,0,11.903749,5.047655,7.131189\C,0,11.188196,3.187099,5.858047\F,0  
,7.53583,3.414565,7.575198\C,0,8.997334,2.382182,6.096761\F,0,9.418163  
,9.592145,7.015015\C,0,7.4526,10.820004,6.949766\F,0,5.670794,8.167883  
,9.481729\C,0,5.55267,10.106857,8.199038\F,0,12.402278,3.13653,5.27558  
4\C,0,10.222569,2.296952,5.503159\F,0,8.032982,1.517327,5.743464\F,0,8  
.02518,11.701373,6.125407\C,0,6.153077,10.995564,7.353989\F,0,4.279581

,10.282757,8.584163\F,0,10.472147,1.371818,4.576947\F,0,5.442959,12.07  
1688,6.906798\F,0,5.019436,11.229522,11.453507\C,0,5.993804,11.776537,  
12.182383\C,0,7.283294,11.824759,11.698587\C,0,5.737554,12.301296,13.4  
41202\F,0,7.541812,11.319532,10.476371\C,0,8.296391,12.348289,12.44815  
1\F,0,4.48051,12.212768,13.901124\C,0,6.726049,12.847633,14.228959\F,0  
,9.544808,12.409383,11.962765\C,0,8.011577,12.868647,13.686282\C,0,6.4  
70207,13.426585,15.576899\F,0,9.012872,13.403242,14.411973\C,0,5.77378  
4,14.644391,15.726493\C,0,6.971245,12.785589,16.689306\Au,0,4.977529,1  
5.650596,14.110715\C,0,5.67583,15.198957,17.021915\F,0,7.636992,11.613  
734,16.555626\C,0,6.824491,13.29996,17.954491\P,0,4.079805,16.738562,1  
2.31288\C,0,6.208474,14.51438,18.10886\C,0,5.098762,16.54141,17.239941  
\F,0,7.310904,12.6339,19.031889\C,0,3.474758,15.596304,11.054059\C,0,5  
.258851,17.826763,11.458282\C,0,2.711636,17.865007,12.734608\F,0,6.126  
358,15.035751,19.351767\C,0,5.90806,17.652405,17.432503\C,0,3.723802,1  
6.786644,17.212887\C,0,3.154207,14.289515,11.431228\C,0,3.320319,15.97  
4799,9.701345\C,0,6.552127,17.374352,11.270494\C,0,4.925144,19.087713,  
11.017457\C,0,2.828147,18.586679,13.897942\C,0,1.600145,18.047258,11.9  
15023\F,0,7.244937,17.479885,17.456375\C,0,5.414289,18.920004,17.56777  
4\F,0,2.879004,15.755925,17.045786\C,0,3.204992,18.054018,17.3402\C,0,  
2.708785,13.379738,10.487511\H,0,3.253644,13.987443,12.466452\C,0,2.84  
4275,15.03668,8.783092\H,0,3.568129,16.97893,9.380036\H,0,6.836637,16.  
392756,11.628725\C,0,7.488433,18.17555,10.621191\C,0,5.860177,19.88338  
1,10.369745\H,0,3.92247,19.463518,11.179782\H,0,3.670764,18.413498,14.  
555998\C,0,1.880313,19.5256,14.233733\C,0,0.654479,18.9986,12.253996\H  
,0,1.478703,17.449768,11.020003\F,0,6.217152,19.965965,17.765112\C,0,4  
.053333,19.122673,17.520031\F,0,1.877058,18.247992,17.286093\H,0,2.477  
399,12.367241,10.794338\C,0,2.556587,13.737005,9.172991\H,0,2.696308,1  
5.327259,7.750414\H,0,8.494535,17.808485,10.460616\C,0,7.140114,19.419  
453,10.189914\H,0,5.58204,20.86545,10.007537\H,0,1.981847,20.088013,15  
.153578\C,0,0.799547,19.756176,13.399825\H,0,-0.207237,19.151424,11.61  
6153\F,0,3.542017,20.355495,17.629841\H,0,2.214892,13.011304,8.445231\  
H,0,7.87585,20.046106,9.701186\H,0,0.074826,20.522896,13.644427\\Versi  
on=ES64L-G09RevE.01\HF=-3155.6679215\RMSD=6.087e-09\Dipole=-2.2459677,  
1.9089446,-6.4437221\Quadrupole=4.4832956,160.7861882,-165.2694838,-29  
.0880351,-125.0281735,-92.9735409\PG=C01 [X(C72H30Au2F26P2)]\@\

1\1\GINC-COMPUTE021\SP\RB3LYP\Gen\C72H30Au2F26P2\CRAT\17-Sep-2020\0\#\#  
p b3lyp/gen pseudo=read counterpoise=2 empiricaldispersion=gd3bj nosym  
m gfpriint\CrystalExplorer Job symop = -, r = 13.0292\0,1\H,0,10.8847  
89,6.677824,-0.086256\C,0,10.553685,7.232547,0.782983\C,0,11.237792,8.  
353248,1.172883\C,0,9.437692,6.798405,1.487985\C,0,10.836815,9.036078,  
2.312345\H,0,12.085727,8.703701,0.597422\C,0,9.012096,7.476268,2.61789  
9\H,0,8.897421,5.921558,1.15283\C,0,9.737761,8.596856,3.034853\H,0,11.  
383292,9.912892,2.636997\P,0,7.591025,6.957948,3.610155\H,0,9.439317,9  
.126626,3.930986\Au,0,8.101145,6.704273,5.825263\C,0,6.333521,8.250678  
,3.311762\C,0,7.006571,5.433898,2.800913\C,0,8.631003,6.564312,7.80913  
8\C,0,5.421968,8.534614,4.328685\C,0,6.274137,8.946888,2.127739\C,0,7.  
530641,4.221949,3.251288\C,0,6.08117,5.433132,1.769668\C,0,9.353911,5.  
44472,8.286566\C,0,8.338995,7.588465,8.717843\H,0,5.472522,8.006832,5.  
273037\C,0,4.44308,9.505389,4.110659\C,0,5.30628,9.920937,1.931994\H,0  
,6.988348,8.733185,1.34221\H,0,8.218001,4.20628,4.08806\C,0,7.173717,3  
.045591,2.627448\C,0,5.726247,4.245483,1.161742\H,0,5.638043,6.364822,  
1.440402\C,0,9.781045,5.4063,9.602677\C,0,9.685779,4.308225,7.360355\C

,0,8.771824,7.501609,10.033955\C,0,7.581671,8.794543,8.267469\H,0,3.714925,9.72275,4.882342\C,0,4.407771,10.177323,2.929819\H,0,5.263093,10.470012,0.999417\H,0,7.592972,2.106212,2.966104\C,0,6.28729,3.062778,1.577105\H,0,5.003726,4.24741,0.354888\F,0,10.483975,4.345758,10.061008\C,0,9.496596,6.419389,10.473188\C,0,10.942071,4.176702,6.790624\C,0,8.749058,3.373367,7.022972\F,0,8.508406,8.504876,10.899691\C,0,8.152618,9.724236,7.408098\C,0,6.286368,9.019219,8.633497\H,0,3.649445,10.934885,2.774814\H,0,6.029086,2.138661,1.07501\F,0,9.930077,6.355228,11.751104\F,0,11.903749,5.047655,7.131189\C,0,11.188196,3.187099,5.858047\F,0,7.53583,3.414565,7.575198\C,0,8.997334,2.382182,6.096761\F,0,9.418163,9.592145,7.015015\C,0,7.4526,10.820004,6.949766\F,0,5.670794,8.167883,9.481729\C,0,5.55267,10.106857,8.199038\F,0,12.402278,3.13653,5.275584\C,0,10.222569,2.296952,5.503159\F,0,8.032982,1.517327,5.743464\F,0,8.02518,11.701373,6.125407\C,0,6.153077,10.995564,7.353989\F,0,4.279581,10.282757,8.584163\F,0,10.472147,1.371818,4.576947\F,0,5.442959,12.071688,6.906798\F,0,0.14056,11.648934,3.437485\C,0,0.222676,11.127563,2.194579\C,0,0.838693,9.913143,2.040211\C,0,-0.309967,11.81214,1.107634\F,0,1.325106,9.247083,3.117608\C,0,0.985448,9.398772,0.775025\C,0,-0.212014,11.257574,-0.187788\C,0,-0.887036,13.154593,1.32566\F,0,1.651195,8.226917,0.641346\C,0,0.484409,10.039768,-0.337383\Au,0,-1.008269,12.263779,-1.803566\C,0,-0.077738,14.265589,1.518222\C,0,-2.261996,13.399827,1.298605\C,0,0.740251,9.460816,-1.685322\P,0,-1.905992,13.351744,-3.601402\F,0,1.25914,14.093067,1.542094\C,0,-0.571508,15.533187,1.653494\F,0,-3.106794,12.369108,1.131505\C,0,-2.780806,14.6672,1.42592\C,0,2.025779,9.48183,-2.227999\C,0,-0.248244,8.914479,-2.473079\C,0,-0.726947,14.439946,-4.455998\C,0,-2.51104,12.209487,-4.860221\C,0,-3.274162,14.47819,-3.179674\F,0,0.231354,16.579149,1.850831\C,0,-1.932465,15.735856,1.605751\F,0,-4.10874,14.861175,1.371811\F,0,3.027074,10.016425,-1.502308\C,0,2.310592,8.961473,-3.466131\F,0,-1.505288,8.825951,-2.013157\C,0,0.008006,8.38972,-3.731899\C,0,0.56633,13.987534,-4.643787\C,0,-1.060654,15.700896,-4.896824\C,0,-2.83159,10.902699,-4.483053\C,0,-2.665479,12.587982,-6.212935\C,0,-3.157651,15.199862,-2.016339\C,0,-4.385653,14.660441,-3.999259\F,0,-2.443781,16.968679,1.715559\F,0,3.559011,9.022566,-3.951516\C,0,1.297496,8.437943,-4.215693\F,0,-0.966361,7.842705,-4.460773\H,0,0.850839,13.005939,-4.285556\C,0,1.502635,14.788734,-5.29309\C,0,-0.125621,16.496565,-5.544536\H,0,-2.063328,16.076702,-4.734499\H,0,-2.732154,10.600626,-3.447829\C,0,-3.277013,9.992921,-5.42677\C,0,-3.141523,11.649863,-7.131189\H,0,-2.417669,13.592113,-6.534245\H,0,-2.315034,15.026681,-1.358284\C,0,-4.105485,16.138784,-1.680548\C,0,-5.331319,15.611784,-3.660285\H,0,-4.507095,14.06295,-4.894278\F,0,1.556014,7.932715,-5.43791\H,0,2.508738,14.421667,-5.453665\C,0,1.154316,16.032635,-5.724367\H,0,-0.403757,17.478634,-5.906744\H,0,-3.508399,8.980424,-5.119943\C,0,-3.429211,10.350188,-6.74129\H,0,-3.28949,1.940442,-8.163867\H,0,-4.003951,16.701195,-0.760703\C,0,-5.186251,16.36936,-2.514456\H,0,-6.193035,15.764606,-4.298129\H,0,1.890052,16.65929,-6.213095\H,0,-3.770906,9.624487,-7.469049\H,0,-5.910972,17.13608,-2.269854\\Version=ES64L-G09RevE.01\HF=-3155.6679223\RMSD=6.087e-09\Dipole=-2.731557,2.27321,-6.6826353\Quadrupole=-33.4435433,90.1747436,-56.7312003,-44.4837048,-50.1879831,-124.6370777\PG=C01 [X(C72H30Au2F26P2)]\@\

1\1\GINC-COMPUTE041\SP\RB3LYP\Gen\C72H30Au2F26P2\CRAT\17-Sep-2020\0\#\#  
p b3lyp/gen pseudo=read counterpoise=2 empiricaldispersion=gd3bj nosym

m gfpint\\CrystalExplorer Job symop = -, r = 12.1629\\0,1\\H,0,10.8847  
89,6.677824,-0.086256\\C,0,10.553685,7.232547,0.782983\\C,0,11.237792,8.  
353248,1.172883\\C,0,9.437692,6.798405,1.487985\\C,0,10.836815,9.036078,  
2.312345\\H,0,12.085727,8.703701,0.597422\\C,0,9.012096,7.476268,2.61789  
9\\H,0,8.897421,5.921558,1.15283\\C,0,9.737761,8.596856,3.034853\\H,0,11.  
383292,9.912892,2.636997\\P,0,7.591025,6.957948,3.610155\\H,0,9.439317,9  
.126626,3.930986\\Au,0,8.101145,6.704273,5.825263\\C,0,6.333521,8.250678  
,3.311762\\C,0,7.006571,5.433898,2.800913\\C,0,8.631003,6.564312,7.80913  
8\\C,0,5.421968,8.534614,4.328685\\C,0,6.274137,8.946888,2.127739\\C,0,7.  
530641,4.221949,3.251288\\C,0,6.08117,5.433132,1.769668\\C,0,9.353911,5.  
44472,8.286566\\C,0,8.338995,7.588465,8.717843\\H,0,5.472522,8.006832,5.  
273037\\C,0,4.44308,9.505389,4.110659\\C,0,5.30628,9.920937,1.931994\\H,0  
,6.988348,8.733185,1.34221\\H,0,8.218001,4.20628,4.08806\\C,0,7.173717,3  
.045591,2.627448\\C,0,5.726247,4.245483,1.161742\\H,0,5.638043,6.364822,  
1.440402\\C,0,9.781045,5.4063,9.602677\\C,0,9.685779,4.308225,7.360355\\C  
,0,8.771824,7.501609,10.033955\\C,0,7.581671,8.794543,8.267469\\H,0,3.71  
4925,9.72275,4.882342\\C,0,4.407771,10.177323,2.929819\\H,0,5.263093,10.  
470012,0.999417\\H,0,7.592972,2.106212,2.966104\\C,0,6.28729,3.062778,1.  
577105\\H,0,5.003726,4.24741,0.354888\\F,0,10.483975,4.345758,10.061008\\  
C,0,9.496596,6.419389,10.473188\\C,0,10.942071,4.176702,6.790624\\C,0,8.  
749058,3.373367,7.022972\\F,0,8.508406,8.504876,10.899691\\C,0,8.152618,  
9.724236,7.408098\\C,0,6.286368,9.019219,8.633497\\H,0,3.649445,10.93488  
5,2.774814\\H,0,6.029086,2.138661,1.07501\\F,0,9.930077,6.355228,11.7511  
04\\F,0,11.903749,5.047655,7.131189\\C,0,11.188196,3.187099,5.858047\\F,0  
,7.53583,3.414565,7.575198\\C,0,8.997334,2.382182,6.096761\\F,0,9.418163  
,9.592145,7.015015\\C,0,7.4526,10.820004,6.949766\\F,0,5.670794,8.167883  
,9.481729\\C,0,5.55267,10.106857,8.199038\\F,0,12.402278,3.13653,5.27558  
4\\C,0,10.222569,2.296952,5.503159\\F,0,8.032982,1.517327,5.743464\\F,0,8  
.02518,11.701373,6.125407\\C,0,6.153077,10.995564,7.353989\\F,0,4.279581  
,10.282757,8.584163\\F,0,10.472147,1.371818,4.576947\\F,0,5.442959,12.07  
1688,6.906798\\C,0,2.551994,12.85913,5.544536\\H,0,2.830131,11.877061,5.  
906744\\C,0,3.487027,13.654798,4.896824\\C,0,1.272057,13.323058,5.724367  
\\H,0,4.489701,13.278992,4.734499\\C,0,3.15332,14.915748,4.455999\\C,0,0.  
923738,14.56696,5.29309\\H,0,0.536321,12.696404,6.213095\\P,0,4.332366,1  
6.00395,3.601402\\C,0,1.860043,15.36816,4.643787\\H,0,-0.082364,14.93402  
7,5.453665\\C,0,4.937413,17.146206,4.860221\\C,0,5.700534,14.877502,3.17  
9673\\Au,0,3.434642,17.091915,1.803565\\H,0,1.575535,16.349754,4.285557\\  
C,0,5.091852,16.767712,6.212935\\C,0,5.257963,18.452995,4.483053\\C,0,5.  
584024,14.155831,2.016339\\C,0,6.812026,14.695252,3.999259\\C,0,2.638387  
,18.09812,0.187789\\H,0,4.844042,15.763581,6.534245\\C,0,5.567896,17.705  
83,7.131189\\H,0,5.158527,18.755068,3.447829\\C,0,5.703385,19.362774,5.4  
2677\\C,0,6.531858,13.216909,1.680548\\H,0,4.741406,14.329012,1.358284\\C  
,0,7.757692,13.74391,3.660285\\H,0,6.933468,15.292744,4.894278\\C,0,2.73  
634,17.543554,-1.107634\\C,0,1.941964,19.315926,0.337383\\C,0,5.855584,1  
9.005507,6.741289\\H,0,5.715863,17.415253,8.163867\\H,0,5.934772,20.3752  
71,5.119943\\H,0,6.430325,12.654499,0.760703\\C,0,7.612624,12.986335,2.5  
14457\\H,0,8.619409,13.591087,4.298129\\C,0,3.313409,16.201099,-1.32566\\  
C,0,2.203697,18.228132,-2.194579\\C,0,1.440926,19.956923,-0.775025\\C,0,  
1.686122,19.894878,1.685322\\H,0,6.197278,19.731207,7.469049\\H,0,8.3373  
45,12.219615,2.269854\\C,0,2.504111,15.090105,-1.518222\\C,0,4.688369,15  
.955867,-1.298605\\F,0,2.285814,17.706758,-3.437485\\C,0,1.58768,19.4425  
51,-2.040211\\F,0,0.775178,21.128777,-0.641346\\C,0,0.400595,19.873865,2  
.227999\\C,0,2.674617,20.441214,2.473079\\C,0,2.997881,13.822506,-1.6534

94\F,0,1.167233,15.262627,-1.542094\C,0,5.207179,14.688494,-1.42592\F,  
0,5.533166,16.986586,-1.131505\F,0,1.101267,20.108612,-3.117608\F,0,-  
.600701,19.33927,1.502308\C,0,0.11578,20.39422,3.46613\F,0,3.931661,20  
.529743,2.013156\C,0,2.418367,20.965973,3.731899\C,0,4.358838,13.61983  
9,-1.605751\F,0,2.195019,12.776546,-1.850831\F,0,6.535113,14.494519,-1  
.371811\F,0,-1.132638,20.333128,3.951516\C,0,1.128876,20.917751,4.2156  
93\F,0,3.392734,21.512989,4.460773\F,0,4.870154,12.387014,-1.71556\F,0  
,0.870359,21.422979,5.43791\\Version=ES64L-G09RevE.01\HF=-3155.6679121  
\RMSD=6.087e-09\Dipole=0.8838818,-1.4148177,-0.5261259\Quadrupole=45.6  
574656,-48.5606729,2.9032073,39.9196245,-32.2022851,42.8411176\PG=C01  
[X(C72H30Au2F26P2)]\@

1\1\GINC-COMPUTE021\SP\RB3LYP\Gen\C72H30Au2F26P2\CRAT\17-Sep-2020\0\#\#  
p b3lyp/gen pseudo=read counterpoise=2 empiricaldispersion=gd3bj nosym  
m gfpriint\CystalExplorer Job symop = -x, -y, -z, r = 11.0295\0,1\H,  
0,10.884789,6.677824,-0.086256\C,0,10.553685,7.232547,0.782983\C,0,11.  
237792,8.353248,1.172883\C,0,9.437692,6.798405,1.487985\C,0,10.836815,  
9.036078,2.312345\H,0,12.085727,8.703701,0.597422\C,0,9.012096,7.47626  
8,2.617899\H,0,8.897421,5.921558,1.15283\C,0,9.737761,8.596856,3.03485  
3\H,0,11.383292,9.912892,2.636997\P,0,7.591025,6.957948,3.610155\H,0,9  
.439317,9.126626,3.930986\Au,0,8.101145,6.704273,5.825263\C,0,6.333521  
,8.250678,3.311762\C,0,7.006571,5.433898,2.800913\C,0,8.631003,6.56431  
2,7.809138\C,0,5.421968,8.534614,4.328685\C,0,6.274137,8.946888,2.1277  
39\C,0,7.530641,4.221949,3.251288\C,0,6.08117,5.433132,1.769668\C,0,9.  
353911,5.44472,8.286566\C,0,8.338995,7.588465,8.717843\H,0,5.472522,8.  
006832,5.273037\C,0,4.44308,9.505389,4.110659\C,0,5.30628,9.920937,1.9  
31994\H,0,6.988348,8.733185,1.34221\H,0,8.218001,4.20628,4.08806\C,0,7  
.173717,3.045591,2.627448\C,0,5.726247,4.245483,1.161742\H,0,5.638043,  
6.364822,1.440402\C,0,9.781045,5.4063,9.602677\C,0,9.685779,4.308225,7  
.360355\C,0,8.771824,7.501609,10.033955\C,0,7.581671,8.794543,8.267469  
\H,0,3.714925,9.72275,4.882342\C,0,4.407771,10.177323,2.929819\H,0,5.2  
63093,10.470012,0.999417\H,0,7.592972,2.106212,2.966104\C,0,6.28729,3.  
062778,1.577105\H,0,5.003726,4.24741,0.354888\F,0,10.483975,4.345758,1  
0.061008\C,0,9.496596,6.419389,10.473188\C,0,10.942071,4.176702,6.7906  
24\C,0,8.749058,3.373367,7.022972\F,0,8.508406,8.504876,10.899691\C,0,  
8.152618,9.724236,7.408098\C,0,6.286368,9.019219,8.633497\H,0,3.649445  
,10.934885,2.774814\H,0,6.029086,2.138661,1.07501\F,0,9.930077,6.35522  
8,11.751104\F,0,11.903749,5.047655,7.131189\C,0,11.188196,3.187099,5.8  
58047\F,0,7.53583,3.414565,7.575198\C,0,8.997334,2.382182,6.096761\F,0  
,9.418163,9.592145,7.015015\C,0,7.4526,10.820004,6.949766\F,0,5.670794  
,8.167883,9.481729\C,0,5.55267,10.106857,8.199038\F,0,12.402278,3.1365  
3,5.275584\C,0,10.222569,2.296952,5.503159\F,0,8.032982,1.517327,5.743  
464\F,0,8.02518,11.701373,6.125407\C,0,6.153077,10.995564,7.353989\F,0  
,4.279581,10.282757,8.584163\F,0,10.472147,1.371818,4.576947\F,0,5.442  
959,12.071688,6.906798\F,0,2.919404,7.781907,7.330118\C,0,1.646314,7.9  
57807,7.715243\C,0,0.912616,9.045445,7.280784\C,0,1.045907,7.069099,8.  
560291\F,0,1.52819,9.89678,6.432552\C,0,-0.382686,9.270121,7.646812\F,  
0,1.756026,5.992977,9.007483\C,0,-0.253616,7.244659,8.964515\C,0,-1.14  
001,10.476198,7.196438\C,0,-0.953634,8.340427,8.506184\F,0,-0.826195,6  
.363291,9.788875\C,0,-1.432019,11.500352,8.105144\C,0,-1.572839,10.563  
055,5.880327\F,0,-2.219179,8.472519,8.899265\Au,0,-0.90216,11.360391,1  
0.089018\C,0,-2.154927,12.619944,7.627715\F,0,-1.309421,9.559788,5.014  
59\C,0,-2.297612,11.645274,5.441092\P,0,-0.39204,11.106716,12.304127\C

,0,-2.58206,12.658364,6.311604\C,0,-2.486795,13.756439,8.553926\F,0,-2.731093,11.709435,4.163176\C,0,0.865463,9.813987,12.602519\C,0,-1.813112,10.588395,13.296382\C,0,0.192414,12.630766,13.113367\F,0,-3.284991,13.718905,5.853272\C,0,-3.743087,13.887961,9.123657\C,0,-1.550073,14.691297,8.891309\C,0,1.777017,9.53005,11.585596\C,0,0.924847,9.117776,13.786541\C,0,-2.538777,9.467808,12.879428\C,0,-2.238707,11.266259,14.426295\C,0,-0.331656,13.842715,12.662993\C,0,1.117814,12.631532,14.144613\F,0,-4.704763,13.01701,8.783092\C,0,-3.989212,14.877565,10.056234\F,0,-0.336845,14.6501,8.339083\C,0,-1.798349,15.682482,9.81752\H,0,1.726462,10.057832,10.641243\C,0,2.755904,8.559275,11.803622\C,0,1.892704,8.143727,13.982287\H,0,0.210636,9.331479,14.572071\H,0,-2.240332,8.938039,11.983294\C,0,-3.63783,9.028584,13.601936\C,0,-3.354701,10.832117,15.131298\H,0,-1.698437,12.143106,14.76145\H,0,-1.019017,13.858384,11.826221\C,0,0.025268,15.019073,13.286834\C,0,1.472737,13.81918,14.752538\H,0,1.560941,11.699841,14.473879\F,0,-5.203293,14.928134,10.638697\C,0,-3.023584,15.767713,10.411123\F,0,-0.833997,16.547337,10.170817\H,0,3.484059,8.341914,11.031939\C,0,2.791214,7.887341,12.984462\H,0,1.935891,7.594652,14.914865\H,0,-4.184308,8.151772,13.277285\C,0,-4.038808,9.711416,14.741398\H,0,-3.685805,11.38684,16.000536\H,0,-0.393988,15.958452,12.948176\C,0,0.911695,15.001886,14.337175\H,0,2.195259,13.817253,15.559392\F,0,-3.273163,16.692846,11.337334\H,0,3.54954,7.129779,13.139467\H,0,-4.886743,9.360963,15.316858\H,0,1.169898,15.926003,14.839272\\Version=ES64L-G09RevE.01\HF=-3155.663416\RMSD=5.862e-09\Dipole=-0.000086,0.000002,0.000079\Quadrupole=-42.0881573,-18.6488401,60.7369974,20.6344636,-49.5165617,24.2343946\PG=C01 [X(C72H30Au2F26P2)]\#@

1\1\GINC-COMPUTE008\SP\RB3LYP\Gen\C72H30Au2F26P2\CRAT\17-Sep-2020\0\#\#  
p b3lyp/gen pseudo=read counterpoise=2 empiricaldispersion=gd3bj nosym  
m gfpriint\CystalExplorer Job symop = -, r = 12.4681\0,1\H,0,10.8847  
89,6.677824,-0.086256\C,0,10.553685,7.232547,0.782983\C,0,11.237792,8.  
353248,1.172883\C,0,9.437692,6.798405,1.487985\C,0,10.836815,9.036078,  
2.312345\H,0,12.085727,8.703701,0.597422\C,0,9.012096,7.476268,2.61789  
9\H,0,8.897421,5.921558,1.15283\C,0,9.737761,8.596856,3.034853\H,0,11.  
383292,9.912892,2.636997\P,0,7.591025,6.957948,3.610155\H,0,9.439317,9  
.126626,3.930986\Au,0,8.101145,6.704273,5.825263\C,0,6.333521,8.250678  
,3.311762\C,0,7.006571,5.433898,2.800913\C,0,8.631003,6.564312,7.80913  
8\C,0,5.421968,8.534614,4.328685\C,0,6.274137,8.946888,2.127739\C,0,7.  
530641,4.221949,3.251288\C,0,6.08117,5.433132,1.769668\C,0,9.353911,5.  
44472,8.286566\C,0,8.338995,7.588465,8.717843\H,0,5.472522,8.006832,5.  
273037\C,0,4.44308,9.505389,4.110659\C,0,5.30628,9.920937,1.931994\H,0  
,6.988348,8.733185,1.34221\H,0,8.218001,4.20628,4.08806\C,0,7.173717,3  
.045591,2.627448\C,0,5.726247,4.245483,1.161742\H,0,5.638043,6.364822,  
1.440402\C,0,9.781045,5.4063,9.602677\C,0,9.685779,4.308225,7.360355\C  
,0,8.771824,7.501609,10.033955\C,0,7.581671,8.794543,8.267469\H,0,3.71  
4925,9.72275,4.882342\C,0,4.407771,10.177323,2.929819\H,0,5.263093,10.  
470012,0.999417\H,0,7.592972,2.106212,2.966104\C,0,6.28729,3.062778,1.  
577105\H,0,5.003726,4.24741,0.354888\F,0,10.483975,4.345758,10.061008\  
C,0,9.496596,6.419389,10.473188\C,0,10.942071,4.176702,6.790624\C,0,8.  
749058,3.373367,7.022972\F,0,8.508406,8.504876,10.899691\C,0,8.152618,  
9.724236,7.408098\C,0,6.286368,9.019219,8.633497\H,0,3.649445,10.93488  
5,2.774814\H,0,6.029086,2.138661,1.07501\F,0,9.930077,6.355228,11.7511  
04\F,0,11.903749,5.047655,7.131189\C,0,11.188196,3.187099,5.858047\F,0  
,7.53583,3.414565,7.575198\C,0,8.997334,2.382182,6.096761\F,0,9.418163



,9.592145,7.015015\C,0,7.4526,10.820004,6.949766\F,0,5.670794,8.167883  
,9.481729\C,0,5.55267,10.106857,8.199038\F,0,12.402278,3.13653,5.27558  
4\C,0,10.222569,2.296952,5.503159\F,0,8.032982,1.517327,5.743464\F,0,8  
.02518,11.701373,6.125407\C,0,6.153077,10.995564,7.353989\F,0,4.279581  
,10.282757,8.584163\F,0,10.472147,1.371818,4.576947\F,0,5.442959,12.07  
1688,6.906798\F,0,8.533373,0.183328,1.371811\C,0,9.861307,-0.010647,1.  
42592\C,0,10.709648,1.058009,1.605751\C,0,10.380118,-1.27802,1.298605\  
F,0,10.198332,2.290832,1.715559\C,0,12.070605,0.85534,1.653494\F,0,9.5  
3532,-2.308739,1.131505\C,0,11.755077,-1.523254,1.32566\F,0,12.873467,  
1.901302,1.850831\C,0,12.564376,-0.412258,1.518222\C,0,12.332146,-2.86  
5707,1.107634\F,0,13.901253,-0.58478,1.542094\C,0,12.430099,-3.420273,  
-0.187788\C,0,12.86479,-3.550285,2.194579\Au,0,11.633844,-2.414068,-1.  
803566\C,0,13.126523,-4.638079,-0.337383\F,0,12.782673,-3.028912,3.437  
485\C,0,13.480806,-4.764704,2.040211\P,0,10.736121,-1.326103,-3.601402  
\C,0,13.627561,-5.279075,0.775025\C,0,13.382364,-5.217031,-1.685322\F,  
0,13.967219,-5.430765,3.117608\C,0,9.367951,-0.199656,-3.179674\C,0,11  
.915167,-0.237901,-4.455998\C,0,10.131074,-2.46836,-4.860221\F,0,14.29  
3308,-6.450929,0.641346\C,0,14.667892,-5.196017,-2.227999\C,0,12.39386  
9,-5.763367,-2.473079\C,0,9.484463,0.522015,-2.016339\C,0,8.256461,-0.  
017405,-3.999259\C,0,13.208443,-0.690313,-4.643787\C,0,11.58146,1.0230  
49,-4.896824\C,0,9.810523,-3.775149,-4.483053\C,0,9.976634,-2.089864,-  
6.212935\F,0,15.669188,-4.661422,-1.502308\C,0,14.952706,-5.716375,-3.  
466131\F,0,11.136826,-5.851897,-2.013157\C,0,12.65012,-6.288126,-3.731  
899\C,0,8.536629,1.460937,-1.680548\H,0,10.32708,0.348834,-1.358284\C,  
0,7.310794,0.933937,-3.660285\H,0,8.135018,-0.614897,-4.894278\H,0,13.  
492952,-1.671908,-4.285556\C,0,14.144749,0.110887,-5.29309\C,0,12.5164  
93,1.818717,-5.544536\H,0,10.578785,1.398855,-4.734499\H,0,9.909959,-4  
.07722,-3.447829\C,0,9.365101,-4.684927,-5.42677\C,0,9.50059,-3.027983  
,-7.131189\H,0,10.224444,-1.085734,-6.534245\F,0,16.201124,-5.655281,-  
3.951516\C,0,13.93961,-6.239904,-4.215693\F,0,11.675752,-6.835142,-4.4  
60773\H,0,8.638163,2.023348,-0.760703\C,0,7.455863,1.691512,-2.514456\  
H,0,6.449079,1.08676,-4.298129\H,0,15.150851,-0.256179,-5.453665\C,0,1  
3.79643,1.354788,-5.724367\H,0,12.238356,2.800786,-5.906744\H,0,9.1337  
15,-5.697423,-5.119943\C,0,9.212902,-4.327659,-6.74129\H,0,9.352624,-2  
.737405,-8.163867\F,0,14.198128,-6.745131,-5.43791\H,0,6.731141,2.4582  
32,-2.269854\H,0,14.532166,1.981443,-6.213095\H,0,8.871208,-5.05336,-7  
.469049\\Version=ES64L-G09RevE.01\HF=-3155.6679178\RMSD=6.087e-09\Dipo  
le=-2.1485434,1.8860449,-6.3961921\Quadrupole=-41.2152075,41.6619669,-  
0.4467594,42.0999376,-115.4866055,-40.6093168\PG=C01 [X(C72H30Au2F26P2  
)]\@

1\1\GINC-COMPUTE041\SP\RB3LYP\Gen\C72H30Au2F26P2\CRAT\17-Sep-2020\0\#\#  
p b3lyp/gen pseudo=read counterpoise=2 empiricaldispersion=gd3bj nosym  
m gfpriint\CystalExplorer Job symop = -, r = 9.78419\0,1\H,0,10.8847  
89,6.677824,-0.086256\C,0,10.553685,7.232547,0.782983\C,0,11.237792,8.  
353248,1.172883\C,0,9.437692,6.798405,1.487985\C,0,10.836815,9.036078,  
2.312345\H,0,12.085727,8.703701,0.597422\C,0,9.012096,7.476268,2.61789  
9\H,0,8.897421,5.921558,1.15283\C,0,9.737761,8.596856,3.034853\H,0,11.  
383292,9.912892,2.636997\P,0,7.591025,6.957948,3.610155\H,0,9.439317,9  
.126626,3.930986\Au,0,8.101145,6.704273,5.825263\C,0,6.333521,8.250678  
,3.311762\C,0,7.006571,5.433898,2.800913\C,0,8.631003,6.564312,7.80913  
8\C,0,5.421968,8.534614,4.328685\C,0,6.274137,8.946888,2.127739\C,0,7.  
530641,4.221949,3.251288\C,0,6.08117,5.433132,1.769668\C,0,9.353911,5.

44472,8.286566\C,0,8.338995,7.588465,8.717843\H,0,5.472522,8.006832,5.273037\C,0,4.44308,9.505389,4.110659\C,0,5.30628,9.920937,1.931994\H,0,6.988348,8.733185,1.34221\H,0,8.218001,4.20628,4.08806\C,0,7.173717,3.045591,2.627448\C,0,5.726247,4.245483,1.161742\H,0,5.638043,6.364822,1.440402\C,0,9.781045,5.4063,9.602677\C,0,9.685779,4.308225,7.360355\C,0,8.771824,7.501609,10.033955\C,0,7.581671,8.794543,8.267469\H,0,3.714925,9.72275,4.882342\C,0,4.407771,10.177323,2.929819\H,0,5.263093,10.470012,0.999417\H,0,7.592972,2.106212,2.966104\C,0,6.28729,3.062778,1.577105\H,0,5.003726,4.24741,0.354888\F,0,10.483975,4.345758,10.061008\C,0,9.496596,6.419389,10.473188\C,0,10.942071,4.176702,6.790624\C,0,8.749058,3.373367,7.022972\F,0,8.508406,8.504876,10.899691\C,0,8.152618,9.724236,7.408098\C,0,6.286368,9.019219,8.633497\H,0,3.649445,10.934885,2.774814\H,0,6.029086,2.138661,1.07501\F,0,9.930077,6.355228,11.751104\F,0,11.903749,5.047655,7.131189\C,0,11.188196,3.187099,5.858047\F,0,7.53583,3.414565,7.575198\C,0,8.997334,2.382182,6.096761\F,0,9.418163,9.592145,7.015015\C,0,7.4526,10.820004,6.949766\F,0,5.670794,8.167883,9.481729\C,0,5.55267,10.106857,8.199038\F,0,12.402278,3.13653,5.275584\C,0,10.222569,2.296952,5.503159\F,0,8.032982,1.517327,5.743464\F,0,8.02518,11.701373,6.125407\C,0,6.153077,10.995564,7.353989\F,0,4.279581,10.282757,8.584163\F,0,10.472147,1.371818,4.576947\F,0,5.442959,12.071688,6.906798\C,0,14.502157,0.690313,4.643787\C,0,13.565852,-0.110887,5.29309\H,0,14.217649,1.671908,4.285557\C,0,15.795434,0.237901,4.455999\H,0,12.559749,0.256179,5.453665\C,0,13.91417,-1.354789,5.724367\P,0,16.97448,1.326103,3.601402\C,0,16.129141,-1.023049,4.896824\H,0,13.178434,-1.981443,6.213095\C,0,15.194107,-1.818717,5.544536\Au,0,16.076756,2.414068,1.803565\C,0,17.579527,2.46836,4.860221\C,0,18.342648,0.199656,3.179673\H,0,17.131815,-1.398855,4.734499\H,0,15.472244,-2.800786,5.906744\C,0,15.2805,3.420273,0.187789\C,0,17.900076,3.775149,4.483053\C,0,17.733965,2.089865,6.212935\C,0,18.226137,-0.522015,2.016339\C,0,19.45414,0.017405,3.999259\C,0,14.584077,4.638079,0.337383\C,0,15.378454,2.865707,-1.107634\H,0,17.80064,4.07722,3.447829\C,0,18.345499,4.684927,5.42677\C,0,18.210011,3.027983,7.131189\H,0,17.486156,1.085734,6.534245\H,0,17.38352,-0.348835,1.358284\C,0,19.173971,-1.460937,1.680548\C,0,20.399805,-0.933937,3.660285\H,0,19.575581,0.614896,4.894278\C,0,14.083039,5.279076,-0.775025\C,0,14.328236,5.217031,1.685322\C,0,14.84581,3.550285,-2.194579\C,0,15.955522,1.523253,-1.32566\H,0,18.576885,5.697423,5.119943\C,0,18.497698,4.327659,6.741289\H,0,18.357977,2.737405,8.163867\H,0,19.072437,-2.023348,0.760703\C,0,20.254738,-1.691513,2.514457\H,0,21.261522,-1.08676,4.298129\F,0,13.417292,6.450929,-0.641346\C,0,14.229794,4.764704,-2.040211\C,0,13.042708,5.196018,2.227999\C,0,15.31673,5.763367,2.473079\F,0,14.927927,3.028912,-3.437485\C,0,15.146225,0.412258,-1.518222\C,0,17.330482,1.27802,-1.298605\H,0,18.839392,5.05336,7.469049\H,0,20.97946,-2.458232,2.269854\F,0,13.743381,5.430765,-3.117608\F,0,12.041412,4.661423,1.502308\C,0,12.757894,5.716374,3.46613\C,0,15.06048,6.288127,3.731899\F,0,16.573774,5.851897,2.013156\F,0,13.809347,0.58478,-1.542094\C,0,15.639995,-0.855341,-1.653494\F,0,18.17528,2.308739,-1.131505\C,0,17.849293,0.010647,-1.42592\F,0,11.509476,5.655281,3.951516\C,0,13.770989,6.239904,4.215693\F,0,16.034847,6.835141,4.460773\F,0,14.837132,-1.901302,-1.850831\C,0,17.000952,-1.058009,-1.605751\F,0,19.177227,-0.183328,-1.371811\F,0,13.512472,6.745131,5.43791\F,0,17.512268,-2.290833,-1.71556\\Version=ES64L-G09RevE.01\HF=-3155.6679065\RMSD=6.087e-09\Dipole=0.7720063,-1.2525398,-0.6046967\Quadrupole=62.5387868,-9.0231493,-53.5156376,-41.5259944,38.2053611,-40.2

423325\PG=C01 [X(C72H30Au2F26P2)]\ \@

1\1\GINC-COMPUTE040\SP\RB3LYP\Gen\C72H30Au2F26P2\CRAT\17-Sep-2020\0\#\#  
p b3lyp/gen pseudo=read counterpoise=2 empiricaldispersion=gd3bj nosym  
m gfpint\CystalExplorer Job symop = -, r = 8.58411\0,1\H,0,10.8847  
89,6.677824,-0.086256\C,0,10.553685,7.232547,0.782983\C,0,11.237792,8.  
353248,1.172883\C,0,9.437692,6.798405,1.487985\C,0,10.836815,9.036078,  
2.312345\H,0,12.085727,8.703701,0.597422\C,0,9.012096,7.476268,2.61789  
9\H,0,8.897421,5.921558,1.15283\C,0,9.737761,8.596856,3.034853\H,0,11.  
383292,9.912892,2.636997\P,0,7.591025,6.957948,3.610155\H,0,9.439317,9  
.126626,3.930986\Au,0,8.101145,6.704273,5.825263\C,0,6.333521,8.250678  
,3.311762\C,0,7.006571,5.433898,2.800913\C,0,8.631003,6.564312,7.80913  
8\C,0,5.421968,8.534614,4.328685\C,0,6.274137,8.946888,2.127739\C,0,7.  
530641,4.221949,3.251288\C,0,6.08117,5.433132,1.769668\C,0,9.353911,5.  
44472,8.286566\C,0,8.338995,7.588465,8.717843\H,0,5.472522,8.006832,5.  
273037\C,0,4.44308,9.505389,4.110659\C,0,5.30628,9.920937,1.931994\H,0  
,6.988348,8.733185,1.34221\H,0,8.218001,4.20628,4.08806\C,0,7.173717,3  
.045591,2.627448\C,0,5.726247,4.245483,1.161742\H,0,5.638043,6.364822,  
1.440402\C,0,9.781045,5.4063,9.602677\C,0,9.685779,4.308225,7.360355\C  
,0,8.771824,7.501609,10.033955\C,0,7.581671,8.794543,8.267469\H,0,3.71  
4925,9.72275,4.882342\C,0,4.407771,10.177323,2.929819\H,0,5.263093,10.  
470012,0.999417\H,0,7.592972,2.106212,2.966104\C,0,6.28729,3.062778,1.  
577105\H,0,5.003726,4.24741,0.354888\F,0,10.483975,4.345758,10.061008\  
C,0,9.496596,6.419389,10.473188\C,0,10.942071,4.176702,6.790624\C,0,8.  
749058,3.373367,7.022972\F,0,8.508406,8.504876,10.899691\C,0,8.152618,  
9.724236,7.408098\C,0,6.286368,9.019219,8.633497\H,0,3.649445,10.93488  
5,2.774814\H,0,6.029086,2.138661,1.07501\F,0,9.930077,6.355228,11.7511  
04\F,0,11.903749,5.047655,7.131189\C,0,11.188196,3.187099,5.858047\F,0  
,7.53583,3.414565,7.575198\C,0,8.997334,2.382182,6.096761\F,0,9.418163  
,9.592145,7.015015\C,0,7.4526,10.820004,6.949766\F,0,5.670794,8.167883  
,9.481729\C,0,5.55267,10.106857,8.199038\F,0,12.402278,3.13653,5.27558  
4\C,0,10.222569,2.296952,5.503159\F,0,8.032982,1.517327,5.743464\F,0,8  
.02518,11.701373,6.125407\C,0,6.153077,10.995564,7.353989\F,0,4.279581  
,10.282757,8.584163\F,0,10.472147,1.371818,4.576947\F,0,5.442959,12.07  
1688,6.906798\C,0,4.487348,0.199656,3.179673\C,0,4.370838,-0.522015,2.  
016339\C,0,5.59884,0.017405,3.999259\P,0,3.119179,1.326103,3.601402\H,  
0,3.52822,-0.348835,1.358284\C,0,5.318672,-1.460937,1.680548\C,0,6.544  
506,-0.933937,3.660285\H,0,5.720281,0.614896,4.894278\Au,0,2.221456,2.  
414068,1.803565\C,0,3.724226,2.46836,4.860221\C,0,1.940134,0.237901,4.  
455999\H,0,5.217138,-2.023348,0.760703\C,0,6.399437,-1.691513,2.514457  
\H,0,7.406222,-1.08676,4.298129\C,0,1.425201,3.420273,0.187789\C,0,4.0  
44777,3.775149,4.483053\C,0,3.878666,2.089865,6.212935\C,0,0.646857,0.  
690313,4.643787\C,0,2.27384,-1.023049,4.896824\H,0,7.124159,-2.458232,  
2.269854\C,0,1.523154,2.865707,-1.107634\C,0,0.728777,4.638079,0.33738  
3\H,0,3.945341,4.07722,3.447829\C,0,4.490199,4.684927,5.42677\C,0,4.35  
471,3.027983,7.131189\H,0,3.630856,1.085734,6.534245\H,0,0.362348,1.67  
1908,4.285557\C,0,-0.289448,-0.110887,5.29309\C,0,1.338807,-1.818717,5  
.544536\H,0,3.276515,-1.398855,4.734499\C,0,2.100222,1.523253,-1.32566  
\C,0,0.99051,3.550285,-2.194579\C,0,0.472935,5.217031,1.685322\C,0,0.2  
27739,5.279076,-0.775025\H,0,4.721585,5.697423,5.119943\C,0,4.642397,4  
.327659,6.741289\H,0,4.502676,2.737405,8.163867\H,0,-1.295551,0.256179  
,5.453665\C,0,0.05887,-1.354789,5.724367\H,0,1.616944,-2.800786,5.9067  
44\C,0,3.475182,1.27802,-1.298605\C,0,1.290925,0.412258,-1.518222\F,0,

1.072627,3.028912,-3.437485\C,0,0.374494,4.764704,-2.040211\C,0,1.4614  
31,5.763367,2.473079\C,0,-0.812592,5.196018,2.227999\F,0,-0.438008,6.4  
50929,-0.641346\H,0,4.984092,5.05336,7.469049\H,0,-0.676865,-1.981443,  
6.213095\F,0,4.31998,2.308739,-1.131505\C,0,3.993993,0.010647,-1.42592  
\C,0,1.784695,-0.855341,-1.653494\F,0,-0.045953,0.58478,-1.542094\F,0,  
-0.11192,5.430765,-3.117608\F,0,2.718475,5.851897,2.013156\C,0,1.20518  
1,6.288127,3.731899\C,0,-1.097406,5.716374,3.46613\F,0,-1.813887,4.661  
423,1.502308\F,0,5.321927,-0.183328,-1.371811\C,0,3.145651,-1.058009,-  
1.605751\F,0,0.981832,-1.901302,-1.850831\F,0,2.179548,6.835141,4.4607  
73\C,0,-0.08431,6.239904,4.215693\F,0,-2.345824,5.655281,3.951516\F,0,  
3.656967,-2.290833,-1.71556\F,0,-0.342828,6.745131,5.43791\\Version=ES  
64L-G09RevE.01\HF=-3155.667892\RMSD=6.087e-09\Dipole=0.7410869,-1.2435  
517,-0.6480546\Quadrupole=7.9289944,19.3443737,-27.2733681,0.9141769,-  
41.7258723,-41.2325775\PG=C01 [X(C72H30Au2F26P2)]\@

1\1\GINC-COMPUTE008\SP\RB3LYP\Gen\C72H30Au2F26P2\CRAT\17-Sep-2020\0\#\#  
p b3lyp/gen pseudo=read counterpoise=2 empiricaldispersion=gd3bj nosym  
m gfpriint\CystalExplorer Job symop = -x, -y, -z, r = 11.4892\0,1\H,  
0,10.884789,6.677824,-0.086256\C,0,10.553685,7.232547,0.782983\C,0,11.  
237792,8.353248,1.172883\C,0,9.437692,6.798405,1.487985\C,0,10.836815,  
9.036078,2.312345\H,0,12.085727,8.703701,0.597422\C,0,9.012096,7.47626  
8,2.617899\H,0,8.897421,5.921558,1.15283\C,0,9.737761,8.596856,3.03485  
3\H,0,11.383292,9.912892,2.636997\P,0,7.591025,6.957948,3.610155\H,0,9  
.439317,9.126626,3.930986\Au,0,8.101145,6.704273,5.825263\C,0,6.333521  
,8.250678,3.311762\C,0,7.006571,5.433898,2.800913\C,0,8.631003,6.56431  
2,7.809138\C,0,5.421968,8.534614,4.328685\C,0,6.274137,8.946888,2.1277  
39\C,0,7.530641,4.221949,3.251288\C,0,6.08117,5.433132,1.769668\C,0,9.  
353911,5.44472,8.286566\C,0,8.338995,7.588465,8.717843\H,0,5.472522,8.  
006832,5.273037\C,0,4.44308,9.505389,4.110659\C,0,5.30628,9.920937,1.9  
31994\H,0,6.988348,8.733185,1.34221\H,0,8.218001,4.20628,4.08806\C,0,7  
.173717,3.045591,2.627448\C,0,5.726247,4.245483,1.161742\H,0,5.638043,  
6.364822,1.440402\C,0,9.781045,5.4063,9.602677\C,0,9.685779,4.308225,7  
.360355\C,0,8.771824,7.501609,10.033955\C,0,7.581671,8.794543,8.267469  
\H,0,3.714925,9.72275,4.882342\C,0,4.407771,10.177323,2.929819\H,0,5.2  
63093,10.470012,0.999417\H,0,7.592972,2.106212,2.966104\C,0,6.28729,3.  
062778,1.577105\H,0,5.003726,4.24741,0.354888\F,0,10.483975,4.345758,1  
0.061008\C,0,9.496596,6.419389,10.473188\C,0,10.942071,4.176702,6.7906  
24\C,0,8.749058,3.373367,7.022972\F,0,8.508406,8.504876,10.899691\C,0,  
8.152618,9.724236,7.408098\C,0,6.286368,9.019219,8.633497\H,0,3.649445  
,10.934885,2.774814\H,0,6.029086,2.138661,1.07501\F,0,9.930077,6.35522  
8,11.751104\F,0,11.903749,5.047655,7.131189\C,0,11.188196,3.187099,5.8  
58047\F,0,7.53583,3.414565,7.575198\C,0,8.997334,2.382182,6.096761\F,0  
,9.418163,9.592145,7.015015\C,0,7.4526,10.820004,6.949766\F,0,5.670794  
,8.167883,9.481729\C,0,5.55267,10.106857,8.199038\F,0,12.402278,3.1365  
3,5.275584\C,0,10.222569,2.296952,5.503159\F,0,8.032982,1.517327,5.743  
464\F,0,8.02518,11.701373,6.125407\C,0,6.153077,10.995564,7.353989\F,0  
,4.279581,10.282757,8.584163\F,0,10.472147,1.371818,4.576947\F,0,5.442  
959,12.071688,6.906798\F,0,9.36895,2.014998,11.337334\C,0,9.618529,1.0  
89865,10.411123\C,0,10.843764,1.004635,9.81752\C,0,8.652902,0.199718,1  
0.056234\F,0,11.808116,1.86949,10.170817\C,0,11.092041,0.01345,8.89130  
9\F,0,7.43882,0.250287,10.638697\C,0,8.899027,-0.789885,9.123657\F,0,1  
2.305268,-0.027747,8.339083\C,0,10.155318,-0.921408,8.553926\F,0,7.937  
35,-1.660837,8.783092\C,0,10.487186,-2.057903,7.627715\C,0,10.060053,-

2.019483,6.311604\C,0,11.210094,-3.177495,8.105144\F,0,9.357123,-0.958  
941,5.853272\C,0,10.344501,-3.032573,5.441092\Au,0,11.739953,-3.317456  
,10.089018\C,0,11.502103,-4.201649,7.196438\F,0,9.911021,-2.968411,4.1  
63176\C,0,11.069274,-4.114792,5.880327\P,0,12.250073,-3.571131,12.3041  
27\C,0,12.259428,-5.407727,7.646812\F,0,11.332692,-5.118059,5.01459\C,  
0,10.829001,-4.089452,13.296382\C,0,13.507576,-4.863861,12.602519\C,0,  
12.834527,-2.047081,13.113367\C,0,11.688479,-6.337419,8.506184\C,0,13.  
554729,-5.632402,7.280784\C,0,10.103336,-5.210039,12.879428\C,0,10.403  
406,-3.411588,14.426295\C,0,14.41913,-5.147797,11.585596\C,0,13.56696,  
-5.560071,13.786541\C,0,12.310457,-0.835131,12.662993\C,0,13.759928,-2  
.046315,14.144613\F,0,10.422935,-6.205328,8.899265\C,0,12.388497,-7.43  
3188,8.964515\F,0,14.170304,-4.781067,6.432552\C,0,14.288427,-6.72004,  
7.715243\H,0,10.401782,-5.739809,11.983294\C,0,9.004283,-5.649262,13.6  
01936\C,0,9.287413,-3.84573,15.131298\H,0,10.943676,-2.534741,14.76145  
\H,0,14.368575,-4.620015,10.641243\C,0,15.398018,-6.118572,11.803622\C  
,0,14.534817,-6.53412,13.982287\H,0,12.85275,-5.346368,14.572071\H,0,1  
1.623096,-0.819463,11.826221\C,0,12.667382,0.341227,13.286834\C,0,14.1  
1485,-0.858667,14.752538\H,0,14.203054,-2.978005,14.473879\F,0,11.8159  
18,-8.314556,9.788875\C,0,13.688021,-7.608748,8.560291\F,0,15.561518,-  
6.89594,7.330118\H,0,8.457806,-6.526075,13.277285\C,0,8.603306,-4.9664  
31,14.741398\H,0,8.956308,-3.291007,16.000536\H,0,16.126173,-6.335932,  
11.031939\C,0,15.433328,-6.790506,12.984462\H,0,14.578004,-7.083195,14  
.914865\H,0,12.248125,1.280605,12.948176\C,0,13.553808,0.324039,14.337  
175\H,0,14.837373,-0.860593,15.559392\F,0,14.398139,-8.684871,9.007483  
\H,0,7.755371,-5.316884,15.316858\H,0,16.191654,-7.548068,13.139467\H,  
0,13.812012,1.248156,14.839272\\Version=ES64L-G09RevE.01\HF=-3155.6634  
096\RMSD=5.862e-09\Dipole=-0.0000059,0.0000011,0.000008\Quadrupole=-21  
.7513074,-21.0087217,42.7600291,-10.3187323,36.1709673,-74.3977484\PG=  
C01 [X(C72H30Au2F26P2)]\@

1\1\GINC-COMPUTE021\SP\RB3LYP\Gen\C72H30Au2F26P2\CRAT\17-Sep-2020\0\#\#  
p b3lyp/gen pseudo=read counterpoise=2 empiricaldispersion=gd3bj nosym  
m gfpint\CystalExplorer Job symop = -, r = 10.5873\0,1\H,0,10.8847  
89,6.677824,-0.086256\C,0,10.553685,7.232547,0.782983\C,0,11.237792,8.  
353248,1.172883\C,0,9.437692,6.798405,1.487985\C,0,10.836815,9.036078,  
2.312345\H,0,12.085727,8.703701,0.597422\C,0,9.012096,7.476268,2.61789  
9\H,0,8.897421,5.921558,1.15283\C,0,9.737761,8.596856,3.034853\H,0,11.  
383292,9.912892,2.636997\P,0,7.591025,6.957948,3.610155\H,0,9.439317,9  
.126626,3.930986\Au,0,8.101145,6.704273,5.825263\C,0,6.333521,8.250678  
,3.311762\C,0,7.006571,5.433898,2.800913\C,0,8.631003,6.564312,7.80913  
8\C,0,5.421968,8.534614,4.328685\C,0,6.274137,8.946888,2.127739\C,0,7.  
530641,4.221949,3.251288\C,0,6.08117,5.433132,1.769668\C,0,9.353911,5.  
44472,8.286566\C,0,8.338995,7.588465,8.717843\H,0,5.472522,8.006832,5.  
273037\C,0,4.44308,9.505389,4.110659\C,0,5.30628,9.920937,1.931994\H,0  
,6.988348,8.733185,1.34221\H,0,8.218001,4.20628,4.08806\C,0,7.173717,3  
.045591,2.627448\C,0,5.726247,4.245483,1.161742\H,0,5.638043,6.364822,  
1.440402\C,0,9.781045,5.4063,9.602677\C,0,9.685779,4.308225,7.360355\C  
,0,8.771824,7.501609,10.033955\C,0,7.581671,8.794543,8.267469\H,0,3.71  
4925,9.72275,4.882342\C,0,4.407771,10.177323,2.929819\H,0,5.263093,10.  
470012,0.999417\H,0,7.592972,2.106212,2.966104\C,0,6.28729,3.062778,1.  
577105\H,0,5.003726,4.24741,0.354888\F,0,10.483975,4.345758,10.061008\  
C,0,9.496596,6.419389,10.473188\C,0,10.942071,4.176702,6.790624\C,0,8.  
749058,3.373367,7.022972\F,0,8.508406,8.504876,10.899691\C,0,8.152618,

9.724236,7.408098\C,0,6.286368,9.019219,8.633497\H,0,3.649445,10.93488  
5,2.774814\H,0,6.029086,2.138661,1.07501\F,0,9.930077,6.355228,11.7511  
04\F,0,11.903749,5.047655,7.131189\C,0,11.188196,3.187099,5.858047\F,0  
,7.53583,3.414565,7.575198\C,0,8.997334,2.382182,6.096761\F,0,9.418163  
,9.592145,7.015015\C,0,7.4526,10.820004,6.949766\F,0,5.670794,8.167883  
,9.481729\C,0,5.55267,10.106857,8.199038\F,0,12.402278,3.13653,5.27558  
4\C,0,10.222569,2.296952,5.503159\F,0,8.032982,1.517327,5.743464\F,0,8  
.02518,11.701373,6.125407\C,0,6.153077,10.995564,7.353989\F,0,4.279581  
,10.282757,8.584163\F,0,10.472147,1.371818,4.576947\F,0,5.442959,12.07  
1688,6.906798\F,0,12.350012,8.825951,-2.013157\C,0,13.607057,8.914479,  
-2.473079\C,0,14.595551,9.460816,-1.685322\C,0,13.863306,8.38972,-3.73  
1899\C,0,14.339709,10.039768,-0.337383\C,0,15.881079,9.48183,-2.227999  
\F,0,12.888939,7.842705,-4.460773\C,0,15.152796,8.437943,-4.215693\C,0  
,13.643286,11.257574,-0.187788\C,0,14.840748,9.398772,0.775025\F,0,16.  
882374,10.016425,-1.502308\C,0,16.165892,8.961473,-3.466131\F,0,15.411  
314,7.932715,-5.43791\C,0,13.545333,11.81214,1.107634\Au,0,12.847032,1  
2.263779,-1.803566\C,0,14.693993,9.913143,2.040211\F,0,15.506495,8.226  
917,0.641346\F,0,17.41431,9.022566,-3.951516\C,0,14.077976,11.127563,2  
.194579\C,0,12.968265,13.154593,1.32566\P,0,11.949307,13.351744,-3.601  
402\F,0,15.180407,9.247083,3.117608\F,0,13.995859,11.648934,3.437485\C  
,0,11.593305,13.399827,1.298605\C,0,13.777562,14.265589,1.518222\C,0,1  
3.128353,14.439946,-4.455998\C,0,11.34426,12.209487,-4.860221\C,0,10.5  
81139,14.47819,-3.179674\F,0,10.748507,12.369108,1.131505\C,0,11.07449  
3,14.6672,1.42592\F,0,15.11444,14.093067,1.542094\C,0,13.283792,15.533  
187,1.653494\C,0,14.42163,13.987534,-4.643787\C,0,12.794646,15.700896,  
-4.896824\C,0,11.023709,10.902699,-4.483053\C,0,11.189821,12.587982,-6  
.212935\C,0,10.697649,15.199862,-2.016339\C,0,9.469647,14.660441,-3.99  
9259\F,0,9.74656,14.861175,1.371811\C,0,11.922834,15.735856,1.605751\F  
,0,14.086655,16.579149,1.850831\H,0,14.706139,13.005939,-4.285556\C,0,  
15.357935,14.788734,-5.29309\C,0,13.729679,16.496565,-5.544536\H,0,11.  
791972,16.076702,-4.734499\H,0,11.123146,10.600626,-3.447829\C,0,10.57  
8287,9.992921,-5.42677\C,0,10.713777,11.649863,-7.131189\H,0,11.437631  
,13.592113,-6.534245\H,0,11.540266,15.026681,-1.358284\C,0,9.749815,16  
.138784,-1.680548\C,0,8.523981,15.611784,-3.660285\H,0,9.348205,14.062  
95,-4.894278\F,0,11.411519,16.968679,1.715559\H,0,16.364038,14.421667,  
-5.453665\C,0,15.009616,16.032635,-5.724367\H,0,13.451543,17.478634,-5  
.906744\H,0,10.346901,8.980424,-5.119943\C,0,10.426088,10.350188,-6.74  
129\H,0,10.56581,11.940442,-8.163867\H,0,9.851349,16.701195,-0.760703\  
C,0,8.669049,16.36936,-2.514456\H,0,7.662265,15.764606,-4.298129\H,0,1  
5.745352,16.65929,-6.213095\H,0,10.084394,9.624487,-7.469049\H,0,7.944  
328,17.13608,-2.269854\\Version=ES64L-G09RevE.01\HF=-3155.667914\RMSD=  
6.087e-09\Dipole=-1.9890858,2.3449398,-6.7103149\Quadrupole=-75.685934  
7,112.680443,-36.9945083,16.966304,-127.3794137,-125.6750052\PG=C01 [X  
(C72H30Au2F26P2)]\@

1\1\GINC-COMPUTE041\SP\RB3LYP\Gen\C72H30Au2F26P2\CRAT\17-Sep-2020\0\#\#  
p b3lyp/gen pseudo=read counterpoise=2 empiricaldispersion=gd3bj nosym  
m gfpriint\\CrystalExplorer Job symop = -x, -y, -z, r = 11.8967\\0,1\H,  
0,10.884789,6.677824,-0.086256\C,0,10.553685,7.232547,0.782983\C,0,11.  
237792,8.353248,1.172883\C,0,9.437692,6.798405,1.487985\C,0,10.836815,  
9.036078,2.312345\H,0,12.085727,8.703701,0.597422\C,0,9.012096,7.47626  
8,2.617899\H,0,8.897421,5.921558,1.15283\C,0,9.737761,8.596856,3.03485  
3\H,0,11.383292,9.912892,2.636997\P,0,7.591025,6.957948,3.610155\H,0,9

.439317,9.126626,3.930986\Au,0,8.101145,6.704273,5.825263\C,0,6.333521,8.250678,3.311762\C,0,7.006571,5.433898,2.800913\C,0,8.631003,6.564312,7.809138\C,0,5.421968,8.534614,4.328685\C,0,6.274137,8.946888,2.127739\C,0,7.530641,4.221949,3.251288\C,0,6.08117,5.433132,1.769668\C,0,9.353911,5.44472,8.286566\C,0,8.338995,7.588465,8.717843\H,0,5.472522,8.006832,5.273037\C,0,4.44308,9.505389,4.110659\C,0,5.30628,9.920937,1.931994\H,0,6.988348,8.733185,1.34221\H,0,8.218001,4.20628,4.08806\C,0,7.173717,3.045591,2.627448\C,0,5.726247,4.245483,1.161742\H,0,5.638043,6.364822,1.440402\C,0,9.781045,5.4063,9.602677\C,0,9.685779,4.308225,7.360355\C,0,8.771824,7.501609,10.033955\C,0,7.581671,8.794543,8.267469\H,0,3.714925,9.72275,4.882342\C,0,4.407771,10.177323,2.929819\H,0,5.263093,10.470012,0.999417\H,0,7.592972,2.106212,2.966104\C,0,6.28729,3.062778,1.577105\H,0,5.003726,4.24741,0.354888\F,0,10.483975,4.345758,1.0061008\C,0,9.496596,6.419389,10.473188\C,0,10.942071,4.176702,6.790624\C,0,8.749058,3.373367,7.022972\F,0,8.508406,8.504876,10.899691\C,0,8.152618,9.724236,7.408098\C,0,6.286368,9.019219,8.633497\H,0,3.649445,10.934885,2.774814\H,0,6.029086,2.138661,1.07501\F,0,9.930077,6.355228,11.751104\F,0,11.903749,5.047655,7.131189\C,0,11.188196,3.187099,5.858047\F,0,7.53583,3.414565,7.575198\C,0,8.997334,2.382182,6.096761\F,0,9.418163,9.592145,7.015015\C,0,7.4526,10.820004,6.949766\F,0,5.670794,8.167883,9.481729\C,0,5.55267,10.106857,8.199038\F,0,12.402278,3.13653,5.275584\C,0,10.222569,2.296952,5.503159\F,0,8.032982,1.517327,5.743464\F,0,8.02518,11.701373,6.125407\C,0,6.153077,10.995564,7.353989\F,0,4.279581,10.282757,8.584163\F,0,10.472147,1.371818,4.576947\F,0,5.442959,12.071688,6.906798\C,0,4.231672,5.641768,-2.312345\H,0,3.685194,4.764955,-2.636997\C,0,3.830694,6.324599,-1.172883\C,0,5.330725,6.080991,-3.034853\H,0,2.982759,5.974146,-0.597422\C,0,4.514801,7.4453,-0.782983\C,0,6.05639,7.201578,-2.617899\H,0,5.62917,5.551221,-3.930986\C,0,5.630795,7.879442,-1.487986\H,0,4.183697,8.000023,0.086255\P,0,7.477462,7.7199,-3.610154\H,0,6.171065,8.756289,-1.152831\C,0,8.734965,6.427169,-3.311762\C,0,8.061915,9.243949,-2.800913\Au,0,6.967342,7.973574,-5.825263\C,0,8.794349,5.730959,-2.12774\C,0,9.646519,6.143233,-4.328685\C,0,8.987316,9.244715,-1.769668\C,0,7.537846,10.455898,-3.251287\C,0,6.437483,8.113535,-7.809138\C,0,9.762206,4.75691,-1.931994\H,0,8.080138,5.944662,-1.34221\C,0,10.625406,5.172458,-4.110659\H,0,9.595964,6.671015,-5.273038\C,0,9.342239,10.432364,-1.161743\H,0,9.430443,8.313025,-1.440402\C,0,7.894771,11.632257,-2.627447\H,0,6.850485,10.471567,-4.08806\C,0,5.714575,9.233127,-8.286566\C,0,6.729492,7.089381,-8.717843\C,0,10.660716,4.500524,-2.929819\H,0,9.805393,4.207835,-0.999417\H,0,11.353561,4.955098,-4.882342\H,0,10.064761,10.430436,-0.354889\C,0,8.781198,11.615069,-1.577105\H,0,7.475514,12.571635,-2.966104\C,0,5.287442,9.271547,-9.602677\C,0,5.382707,10.369622,-7.360354\C,0,6.296663,7.176238,-10.033954\C,0,7.486816,5.883303,-8.267468\H,0,11.419042,3.742962,-2.774814\H,0,9.0394,12.539186,-1.07501\F,0,4.584512,10.332088,-10.061008\C,0,5.57189,8.258457,-10.473188\C,0,4.126415,10.501144,-6.790624\C,0,6.319429,11.30448,-7.022972\F,0,6.560081,6.172971,-10.899691\C,0,6.915868,4.953611,-7.408098\C,0,8.782118,5.658628,-8.633497\F,0,5.13841,8.322618,-11.751105\F,0,3.164739,9.630193,-7.131189\C,0,3.880291,11.490748,-5.858047\F,0,7.532657,11.263283,-7.575198\C,0,6.071153,12.295665,-6.096761\F,0,5.650323,5.085702,-7.015015\C,0,7.615886,3.857842,-6.949766\F,0,9.397693,6.509963,-9.481729\C,0,9.515816,4.57099,-8.199038\F,0,2.666209,11.541317,-5.275584\C,0,4.845918,12.380896,-5.503158\F,0,7.035505,13.16052,-5.743464\F,0,7.043307,2.976474,-6.125406\C,0,8.915409,

3.682282,-7.35399\F,0,10.788906,4.39509,-8.584164\F,0,4.596339,13.3060  
28,-4.576947\F,0,9.625527,2.60616,-6.906798\\Version=ES64L-G09RevE.01\  
HF=-3155.6634003\RMSD=5.862e-09\Dipole=-0.0000058,0.0000032,0.0000081\  
Quadrupole=43.6892391,45.8642061,-89.5534452,8.4629605,-20.1749451,12.  
9754053\PG=C01 [X(C72H30Au2F26P2)]\@

1\1\GINC-COMPUTE041\SP\RB3LYP\Gen\C72H30Au2F26P2\CRAT\17-Sep-2020\0\#\#  
p b3lyp/gen pseudo=read counterpoise=2 empiricaldispersion=gd3bj nosym  
m gfpriint\CystalExplorer Job symop = -, r = 11.8152\|0,1\H,0,10.8847  
89,6.677824,-0.086256\C,0,10.553685,7.232547,0.782983\C,0,11.237792,8.  
353248,1.172883\C,0,9.437692,6.798405,1.487985\C,0,10.836815,9.036078,  
2.312345\H,0,12.085727,8.703701,0.597422\C,0,9.012096,7.476268,2.61789  
9\H,0,8.897421,5.921558,1.15283\C,0,9.737761,8.596856,3.034853\H,0,11.  
383292,9.912892,2.636997\P,0,7.591025,6.957948,3.610155\H,0,9.439317,9  
.126626,3.930986\Au,0,8.101145,6.704273,5.825263\C,0,6.333521,8.250678  
,3.311762\C,0,7.006571,5.433898,2.800913\C,0,8.631003,6.564312,7.80913  
8\C,0,5.421968,8.534614,4.328685\C,0,6.274137,8.946888,2.127739\C,0,7.  
530641,4.221949,3.251288\C,0,6.08117,5.433132,1.769668\C,0,9.353911,5.  
44472,8.286566\C,0,8.338995,7.588465,8.717843\H,0,5.472522,8.006832,5.  
273037\C,0,4.44308,9.505389,4.110659\C,0,5.30628,9.920937,1.931994\H,0  
,6.988348,8.733185,1.34221\H,0,8.218001,4.20628,4.08806\C,0,7.173717,3  
.045591,2.627448\C,0,5.726247,4.245483,1.161742\H,0,5.638043,6.364822,  
1.440402\C,0,9.781045,5.4063,9.602677\C,0,9.685779,4.308225,7.360355\C  
,0,8.771824,7.501609,10.033955\C,0,7.581671,8.794543,8.267469\H,0,3.71  
4925,9.72275,4.882342\C,0,4.407771,10.177323,2.929819\H,0,5.263093,10.  
470012,0.999417\H,0,7.592972,2.106212,2.966104\C,0,6.28729,3.062778,1.  
577105\H,0,5.003726,4.24741,0.354888\F,0,10.483975,4.345758,10.061008\  
C,0,9.496596,6.419389,10.473188\C,0,10.942071,4.176702,6.790624\C,0,8.  
749058,3.373367,7.022972\F,0,8.508406,8.504876,10.899691\C,0,8.152618,  
9.724236,7.408098\C,0,6.286368,9.019219,8.633497\H,0,3.649445,10.93488  
5,2.774814\H,0,6.029086,2.138661,1.07501\F,0,9.930077,6.355228,11.7511  
04\F,0,11.903749,5.047655,7.131189\C,0,11.188196,3.187099,5.858047\F,0  
,7.53583,3.414565,7.575198\C,0,8.997334,2.382182,6.096761\F,0,9.418163  
,9.592145,7.015015\C,0,7.4526,10.820004,6.949766\F,0,5.670794,8.167883  
,9.481729\C,0,5.55267,10.106857,8.199038\F,0,12.402278,3.13653,5.27558  
4\C,0,10.222569,2.296952,5.503159\F,0,8.032982,1.517327,5.743464\F,0,8  
.02518,11.701373,6.125407\C,0,6.153077,10.995564,7.353989\F,0,4.279581  
,10.282757,8.584163\F,0,10.472147,1.371818,4.576947\F,0,5.442959,12.07  
1688,6.906798\F,0,10.305778,5.695556,14.782776\C,0,9.46098,4.664836,14  
.615675\C,0,8.08602,4.91007,14.588621\C,0,9.979791,3.397464,14.488361\  
C,0,7.508952,6.252523,14.806647\C,0,7.276722,3.799075,14.396059\F,0,11  
.307725,3.20349,14.54247\C,0,9.13145,2.328808,14.30853\C,0,6.976308,6.  
937102,13.719702\C,0,7.410998,6.807089,16.10207\F,0,5.939845,3.971596,  
14.372188\C,0,7.770493,2.531476,14.260787\F,0,9.642765,1.095984,14.198  
721\F,0,7.058425,6.415729,12.476796\C,0,6.360291,8.151521,13.87407\C,0  
,6.714575,8.024896,16.251663\Au,0,8.207253,5.800885,17.717846\F,0,6.96  
763,1.485515,14.06345\F,0,5.873878,8.817581,12.796673\C,0,6.213537,8.6  
65893,15.139256\C,0,6.458734,8.603848,17.599604\P,0,9.104977,4.71292,1  
9.515682\F,0,5.54779,9.837746,15.272935\C,0,5.173206,8.582835,18.14228  
1\C,0,7.447228,9.150184,18.38736\C,0,7.925931,3.624718,20.370279\C,0,9  
.710024,5.855176,20.774502\C,0,10.473145,3.586473,19.093954\F,0,4.1719  
1,8.04824,17.41659\C,0,4.888391,9.103191,19.380411\F,0,8.704272,9.2387  
14,17.927437\C,0,7.190979,9.674944,19.646179\C,0,6.632655,4.07713,20.5



58067\C,0,8.259638,2.363768,20.811106\C,0,10.030575,7.161965,20.397333  
\C,0,9.864464,5.476682,22.127216\C,0,10.356636,2.864802,17.93062\C,0,1  
1.584638,3.404222,19.91354\F,0,3.639974,9.042097,19.865797\C,0,5.90148  
8,9.626721,20.129974\F,0,8.165345,10.221958,20.375053\H,0,6.348146,5.0  
58725,20.199837\C,0,5.69635,3.27593,21.207371\C,0,7.324605,1.5681,21.4  
58817\H,0,9.262313,1.987962,20.648779\H,0,9.931139,7.464037,19.36211\C  
,0,10.475996,8.071744,21.341051\C,0,10.340508,6.4148,23.045469\H,0,9.6  
16653,4.472551,22.448524\H,0,9.514018,3.037982,17.272564\C,0,11.304469  
,1.92588,17.59483\C,0,12.530303,2.45288,19.574566\H,0,11.706079,4.0017  
13,20.808559\F,0,5.64297,10.131948,21.35219\H,0,4.690247,3.642996,21.3  
67945\C,0,6.044668,2.032028,21.638647\H,0,7.602742,0.586031,21.821026\  
H,0,10.707383,9.08424,21.034224\C,0,10.628196,7.714476,22.655571\H,0,1  
0.488475,6.124222,24.078148\H,0,11.202936,1.363469,16.674984\C,0,12.38  
5235,1.695304,18.428738\H,0,13.39202,2.300057,20.21241\H,0,5.308932,1.  
405374,22.127375\H,0,10.96989,8.440177,23.383331\H,0,13.109957,0.92858  
5,18.184135\\Version=ES64L-G09RevE.01\HF=-3155.6679178\RMSD=6.087e-09\  
Dipole=0.7296803,-1.2052023,-0.6877013\Quadrupole=-18.3588048,-62.7045  
353,81.0633401,-7.4740848,38.2879695,-70.9646548\PG=C01 [X(C72H30Au2F2  
6P2)]\@

1\1\GINC-COMPUTE021\SP\RB3LYP\Gen\C72H30Au2F26P2\CRAT\17-Sep-2020\0\#\#  
p b3lyp/gen pseudo=read counterpoise=2 empiricaldispersion=gd3bj nosym  
m gfpint\CystalExplorer Job symop = -, r = 10.953\0,1\H,0,10.88478  
9,6.677824,-0.086256\C,0,10.553685,7.232547,0.782983\C,0,11.237792,8.3  
53248,1.172883\C,0,9.437692,6.798405,1.487985\C,0,10.836815,9.036078,2  
.312345\H,0,12.085727,8.703701,0.597422\C,0,9.012096,7.476268,2.617899  
\H,0,8.897421,5.921558,1.15283\C,0,9.737761,8.596856,3.034853\H,0,11.3  
83292,9.912892,2.636997\H,0,7.591025,6.957948,3.610155\H,0,9.439317,9.  
126626,3.930986\Au,0,8.101145,6.704273,5.825263\C,0,6.333521,8.250678,  
3.311762\C,0,7.006571,5.433898,2.800913\C,0,8.631003,6.564312,7.809138  
\C,0,5.421968,8.534614,4.328685\C,0,6.274137,8.946888,2.127739\C,0,7.5  
30641,4.221949,3.251288\C,0,6.08117,5.433132,1.769668\C,0,9.353911,5.4  
4472,8.286566\C,0,8.338995,7.588465,8.717843\H,0,5.472522,8.006832,5.2  
73037\C,0,4.44308,9.505389,4.110659\C,0,5.30628,9.920937,1.931994\H,0,  
6.988348,8.733185,1.34221\H,0,8.218001,4.20628,4.08806\C,0,7.173717,3.  
045591,2.627448\C,0,5.726247,4.245483,1.161742\H,0,5.638043,6.364822,1.  
.440402\C,0,9.781045,5.4063,9.602677\C,0,9.685779,4.308225,7.360355\C,  
0,8.771824,7.501609,10.033955\C,0,7.581671,8.794543,8.267469\H,0,3.714  
925,9.72275,4.882342\C,0,4.407771,10.177323,2.929819\H,0,5.263093,10.4  
70012,0.999417\H,0,7.592972,2.106212,2.966104\C,0,6.28729,3.062778,1.5  
77105\H,0,5.003726,4.24741,0.354888\F,0,10.483975,4.345758,10.061008\C  
,0,9.496596,6.419389,10.473188\C,0,10.942071,4.176702,6.790624\C,0,8.7  
49058,3.373367,7.022972\F,0,8.508406,8.504876,10.899691\C,0,8.152618,9  
.724236,7.408098\C,0,6.286368,9.019219,8.633497\H,0,3.649445,10.934885  
,2.774814\H,0,6.029086,2.138661,1.07501\F,0,9.930077,6.355228,11.75110  
4\F,0,11.903749,5.047655,7.131189\C,0,11.188196,3.187099,5.858047\F,0,  
7.53583,3.414565,7.575198\C,0,8.997334,2.382182,6.096761\F,0,9.418163,  
9.592145,7.015015\C,0,7.4526,10.820004,6.949766\F,0,5.670794,8.167883,  
9.481729\C,0,5.55267,10.106857,8.199038\F,0,12.402278,3.13653,5.275584  
\C,0,10.222569,2.296952,5.503159\F,0,8.032982,1.517327,5.743464\F,0,8.  
02518,11.701373,6.125407\C,0,6.153077,10.995564,7.353989\F,0,4.279581,  
10.282757,8.584163\F,0,10.472147,1.371818,4.576947\F,0,5.442959,12.071  
688,6.906798\C,0,6.275246,3.497704,10.621191\H,0,7.281349,3.130638,10.

460616\C,0,5.926928,4.741605,10.189914\C,0,5.338941,2.696504,11.270494  
\H,0,6.662663,5.368259,9.701186\C,0,4.646991,5.205534,10.369745\C,0,4.  
045664,3.148916,11.458282\H,0,5.62345,1.714909,11.628725\H,0,4.368854,  
6.187603,10.007537\C,0,3.711958,4.409866,11.017457\P,0,2.866619,2.0607  
14,12.31288\H,0,2.709283,4.785672,11.179782\Au,0,3.764343,0.972749,14.  
110715\C,0,2.261572,0.918457,11.054059\C,0,1.49845,3.187161,12.734608\  
C,0,4.560597,-0.033456,15.726493\C,0,1.941021,-0.388332,11.431228\C,0,  
2.107132,1.296953,9.701345\C,0,1.61496,3.908832,13.897942\C,0,0.386959  
,3.369412,11.915023\C,0,4.462644,0.52111,17.021915\C,0,5.25702,-1.2512  
62,15.576899\H,0,2.040457,-0.690404,12.466452\C,0,1.495599,-1.298109,1  
0.487511\C,0,1.631088,0.358834,8.783092\H,0,2.354943,2.301083,9.380036  
\H,0,2.457577,3.735651,14.555998\C,0,0.667126,4.847754,14.233733\C,0,-  
0.558708,4.320754,12.253996\H,0,0.265516,2.77192,11.020003\C,0,4.99528  
7,-0.163468,18.10886\C,0,3.885576,1.863563,17.239941\C,0,5.758059,-1.8  
92258,16.689306\C,0,5.512863,-1.830214,14.228959\H,0,1.264212,-2.31060  
6,10.794338\C,0,1.3434,-0.940842,9.172991\H,0,1.483121,0.649412,7.7504  
14\H,0,0.76866,5.410165,15.153578\C,0,-0.413639,5.07833,13.399825\H,0,  
-1.420424,4.473577,11.616153\F,0,4.913171,0.357905,19.351767\C,0,5.611  
304,-1.377887,17.954491\C,0,4.694873,2.974559,17.432503\C,0,2.510616,2  
.108797,17.212887\F,0,6.423806,-3.064112,16.555626\C,0,6.79839,-1.8092  
,13.686282\C,0,4.524368,-2.37655,13.441202\H,0,1.001706,-1.666543,8.44  
5231\H,0,-1.138361,5.845049,13.644427\F,0,6.097718,-2.043947,19.031889  
\F,0,6.031751,2.802037,17.456375\C,0,4.201103,4.242157,17.567774\F,0,1  
.665818,1.078078,17.045786\C,0,1.991805,3.37617,17.3402\F,0,7.799685,-  
1.274605,14.411973\C,0,7.083204,-2.329558,12.448151\F,0,3.267323,-2.46  
508,13.901124\C,0,4.780617,-2.90131,12.182383\F,0,5.003966,5.288119,17  
.765112\C,0,2.840146,4.444826,17.520031\F,0,0.663871,3.570145,17.28609  
3\F,0,8.331622,-2.268464,11.962765\C,0,6.070107,-2.853087,11.698587\F,  
0,3.80625,-3.448325,11.453507\F,0,2.32883,5.677649,17.629841\F,0,6.328  
626,-3.358315,10.476371\\Version=ES64L-G09RevE.01\HF=-3155.6679184\RMS  
D=6.087e-09\Dipole=-1.9888809,2.3331287,-6.8362896\Quadrupole=43.58223  
94,106.9018431,-150.4840826,15.1007753,-118.5199918,-7.0174559\PG=C01  
[X(C72H30Au2F26P2)]\@

1\1\GINC-COMPUTE041\SP\RB3LYP\Gen\C72H30Au2F26P2\CRAT\17-Sep-2020\0\#\#  
p b3lyp/gen pseudo=read counterpoise=2 empiricaldispersion=gd3bj nosym  
m gfprint\CrystalExplorer Job symop = -, r = 13.9481\0,1\H,0,10.8847  
89,6.677824,-0.086256\C,0,10.553685,7.232547,0.782983\C,0,11.237792,8.  
353248,1.172883\C,0,9.437692,6.798405,1.487985\C,0,10.836815,9.036078,  
2.312345\H,0,12.085727,8.703701,0.597422\C,0,9.012096,7.476268,2.61789  
9\H,0,8.897421,5.921558,1.15283\C,0,9.737761,8.596856,3.034853\H,0,11.  
383292,9.912892,2.636997\P,0,7.591025,6.957948,3.610155\H,0,9.439317,9  
.126626,3.930986\Au,0,8.101145,6.704273,5.825263\C,0,6.333521,8.250678  
,3.311762\C,0,7.006571,5.433898,2.800913\C,0,8.631003,6.564312,7.80913  
8\C,0,5.421968,8.534614,4.328685\C,0,6.274137,8.946888,2.127739\C,0,7.  
530641,4.221949,3.251288\C,0,6.08117,5.433132,1.769668\C,0,9.353911,5.  
44472,8.286566\C,0,8.338995,7.588465,8.717843\H,0,5.472522,8.006832,5.  
273037\C,0,4.44308,9.505389,4.110659\C,0,5.30628,9.920937,1.931994\H,0  
,6.988348,8.733185,1.34221\H,0,8.218001,4.20628,4.08806\C,0,7.173717,3  
.045591,2.627448\C,0,5.726247,4.245483,1.161742\H,0,5.638043,6.364822,  
1.440402\C,0,9.781045,5.4063,9.602677\C,0,9.685779,4.308225,7.360355\C  
,0,8.771824,7.501609,10.033955\C,0,7.581671,8.794543,8.267469\H,0,3.71  
4925,9.72275,4.882342\C,0,4.407771,10.177323,2.929819\H,0,5.263093,10.

470012,0.999417\H,0,7.592972,2.106212,2.966104\C,0,6.28729,3.062778,1.577105\H,0,5.003726,4.24741,0.354888\F,0,10.483975,4.345758,10.061008\C,0,9.496596,6.419389,10.473188\C,0,10.942071,4.176702,6.790624\C,0,8.749058,3.373367,7.022972\F,0,8.508406,8.504876,10.899691\C,0,8.152618,9.724236,7.408098\C,0,6.286368,9.019219,8.633497\H,0,3.649445,10.934885,2.774814\H,0,6.029086,2.138661,1.07501\F,0,9.930077,6.355228,11.751104\F,0,11.903749,5.047655,7.131189\C,0,11.188196,3.187099,5.858047\F,0,7.53583,3.414565,7.575198\C,0,8.997334,2.382182,6.096761\F,0,9.418163,9.592145,7.015015\C,0,7.4526,10.820004,6.949766\F,0,5.670794,8.167883,9.481729\C,0,5.55267,10.106857,8.199038\F,0,12.402278,3.13653,5.275584\C,0,10.222569,2.296952,5.503159\F,0,8.032982,1.517327,5.743464\F,0,8.02518,11.701373,6.125407\C,0,6.153077,10.995564,7.353989\F,0,4.279581,10.282757,8.584163\F,0,10.472147,1.371818,4.576947\F,0,5.442959,12.071688,6.906798\H,0,12.716939,5.845049,13.644427\C,0,13.441661,5.07833,13.399825\C,0,13.296593,4.320754,12.253996\C,0,14.522427,4.847754,14.233733\H,0,12.434876,4.473577,11.616153\C,0,14.242259,3.369412,11.915023\C,0,15.470261,3.908832,13.897942\H,0,14.62396,5.410165,15.153578\C,0,15.353749,3.187161,12.734608\H,0,14.120816,2.77192,11.020003\H,0,16.312878,3.735651,14.555998\P,0,16.721918,2.060714,12.31288\Au,0,17.619642,0.972749,14.110715\C,0,17.900965,3.148916,11.458282\C,0,16.116871,0.918457,11.054059\C,0,18.415897,-0.033456,15.726493\C,0,19.194241,2.696504,11.270494\C,0,17.567257,4.409866,11.017457\C,0,15.796321,-0.388332,11.431228\C,0,15.962432,1.296953,9.701345\C,0,18.317944,0.52111,17.021915\C,0,19.11232,-1.251262,15.576899\H,0,19.47875,1.714909,11.628725\C,0,20.130547,3.497704,10.621191\C,0,18.502291,5.205534,10.369745\H,0,16.564583,4.785672,11.179782\H,0,15.895757,-0.690404,12.466452\C,0,15.350899,-1.298109,10.487511\C,0,15.486388,0.358834,8.783092\H,0,16.210243,2.301083,9.380036\C,0,18.850588,-0.163468,18.10886\C,0,17.740875,1.863563,17.239941\C,0,19.613359,-1.892258,16.689306\C,0,19.368162,-1.830214,14.228959\H,0,21.136648,3.130638,10.460616\C,0,19.782228,4.741605,10.189914\H,0,18.224154,6.187603,10.007537\H,0,15.119513,-2.310606,10.794338\C,0,15.1987,-0.940842,9.172991\H,0,15.338422,0.649412,7.750414\F,0,18.768471,0.357905,19.351767\C,0,19.466604,-1.377887,17.954491\C,0,18.550173,2.974559,17.432503\C,0,16.365915,2.108797,17.212887\F,0,20.279106,-3.064112,16.555626\C,0,20.65369,-1.8092,13.686282\C,0,18.379667,-2.37655,13.441202\H,0,20.517963,5.368259,9.701186\H,0,14.857006,-1.666543,8.445231\F,0,19.953018,-2.043947,19.031889\F,0,19.887051,2.802037,17.456375\C,0,18.056402,4.242157,17.567774\F,0,15.521118,1.078078,17.045786\C,0,15.847105,3.37617,17.3402\F,0,21.654985,-1.274605,14.411973\C,0,20.938503,-2.329558,12.448151\F,0,17.122623,-2.46508,13.901124\C,0,18.635918,-2.90131,12.182383\F,0,18.859266,5.288119,17.765112\C,0,16.695446,4.444826,17.520031\F,0,14.519171,3.570145,17.286093\F,0,22.186922,-2.268464,11.962765\C,0,19.925407,-2.853087,11.698587\F,0,17.661551,-3.448325,11.453507\F,0,16.18413,5.677649,17.629841\F,0,20.183926,-3.358315,10.476371\\Version=ES64L-G09RevE.01\HF=-3155.6679241\RMSD=6.087e-09\Dipole=-2.7525422,2.2707668,-6.7633981\Quadrupole=-29.1301942,141.7887947,-112.6586005,55.1313905,-210.825294,-7.5367827\PG=C01[X(C72H30Au2F26P2)]\#@

1\GINC-COMPUTE008\SP\RB3LYP\Gen\C72H30Au2F26P2\CRAT\17-Sep-2020\0\#\#  
p b3lyp/gen pseudo=read counterpoise=2 empiricaldispersion=gd3bj nosym  
m gfpriint\\CrystalExplorer Job symop = -x, -y, -z, r = 7.74108\\0,1\H,  
0,10.884789,6.677824,-0.086256\C,0,10.553685,7.232547,0.782983\C,0,11.

237792,8.353248,1.172883\C,0,9.437692,6.798405,1.487985\C,0,10.836815,  
9.036078,2.312345\H,0,12.085727,8.703701,0.597422\C,0,9.012096,7.47626  
8,2.617899\H,0,8.897421,5.921558,1.15283\C,0,9.737761,8.596856,3.03485  
3\H,0,11.383292,9.912892,2.636997\P,0,7.591025,6.957948,3.610155\H,0,9  
.439317,9.126626,3.930986\Au,0,8.101145,6.704273,5.825263\C,0,6.333521  
,8.250678,3.311762\C,0,7.006571,5.433898,2.800913\C,0,8.631003,6.56431  
2,7.809138\C,0,5.421968,8.534614,4.328685\C,0,6.274137,8.946888,2.1277  
39\C,0,7.530641,4.221949,3.251288\C,0,6.08117,5.433132,1.769668\C,0,9.  
353911,5.44472,8.286566\C,0,8.338995,7.588465,8.717843\H,0,5.472522,8.  
006832,5.273037\C,0,4.44308,9.505389,4.110659\C,0,5.30628,9.920937,1.9  
31994\H,0,6.988348,8.733185,1.34221\H,0,8.218001,4.20628,4.08806\C,0,7  
.173717,3.045591,2.627448\C,0,5.726247,4.245483,1.161742\H,0,5.638043,  
6.364822,1.440402\C,0,9.781045,5.4063,9.602677\C,0,9.685779,4.308225,7  
.360355\C,0,8.771824,7.501609,10.033955\C,0,7.581671,8.794543,8.267469  
\H,0,3.714925,9.72275,4.882342\C,0,4.407771,10.177323,2.929819\H,0,5.2  
63093,10.470012,0.999417\H,0,7.592972,2.106212,2.966104\C,0,6.28729,3.  
062778,1.577105\H,0,5.003726,4.24741,0.354888\F,0,10.483975,4.345758,1  
0.061008\C,0,9.496596,6.419389,10.473188\C,0,10.942071,4.176702,6.7906  
24\C,0,8.749058,3.373367,7.022972\F,0,8.508406,8.504876,10.899691\C,0,  
8.152618,9.724236,7.408098\C,0,6.286368,9.019219,8.633497\H,0,3.649445  
,10.934885,2.774814\H,0,6.029086,2.138661,1.07501\F,0,9.930077,6.35522  
8,11.751104\F,0,11.903749,5.047655,7.131189\C,0,11.188196,3.187099,5.8  
58047\F,0,7.53583,3.414565,7.575198\C,0,8.997334,2.382182,6.096761\F,0  
,9.418163,9.592145,7.015015\C,0,7.4526,10.820004,6.949766\F,0,5.670794  
,8.167883,9.481729\C,0,5.55267,10.106857,8.199038\F,0,12.402278,3.1365  
3,5.275584\C,0,10.222569,2.296952,5.503159\F,0,8.032982,1.517327,5.743  
464\F,0,8.02518,11.701373,6.125407\C,0,6.153077,10.995564,7.353989\F,0  
,4.279581,10.282757,8.584163\F,0,10.472147,1.371818,4.576947\F,0,5.442  
959,12.071688,6.906798\F,0,9.150537,13.01701,8.783092\C,0,10.112213,13  
.887961,9.123657\C,0,11.368505,13.756439,8.553926\C,0,9.866088,14.8775  
65,10.056234\C,0,11.700373,12.619944,7.627715\C,0,12.305227,14.691297,  
8.891309\F,0,8.652007,14.928134,10.638697\C,0,10.831717,15.767713,10.4  
11123\C,0,12.423282,11.500352,8.105144\C,0,11.273239,12.658364,6.31160  
4\F,0,13.518455,14.6501,8.339083\C,0,12.056951,15.682482,9.81752\F,0,1  
0.582137,16.692846,11.337334\C,0,12.71529,10.476198,7.196438\Au,0,12.9  
53139,11.360391,10.089018\F,0,10.57031,13.718905,5.853272\C,0,11.55768  
8,11.645274,5.441092\F,0,13.021303,16.547337,10.170817\C,0,12.28246,10  
.563055,5.880327\C,0,13.472614,9.270121,7.646812\P,0,13.46326,11.10671  
6,12.304127\F,0,11.124207,11.709435,4.163176\F,0,12.545878,9.559788,5.  
01459\C,0,12.901666,8.340427,8.506184\C,0,14.767916,9.045445,7.280784\  
C,0,12.042188,10.588395,13.296382\C,0,14.720763,9.813987,12.602519\C,0  
,14.047713,12.630766,13.113367\F,0,11.636121,8.472519,8.899265\C,0,13.  
601684,7.244659,8.964515\C,0,15.501614,7.957807,7.715243\F,0,15.383491  
,9.89678,6.432552\C,0,11.316523,9.467808,12.879428\C,0,11.616592,11.26  
6259,14.426295\C,0,15.632317,9.53005,11.585596\C,0,14.780147,9.117776,  
13.786541\C,0,13.523643,13.842715,12.662993\C,0,14.973114,12.631532,14  
.144613\F,0,13.029105,6.363291,9.788875\C,0,14.901207,7.069099,8.56029  
1\F,0,16.774704,7.781907,7.330118\H,0,11.614968,8.938039,11.983294\C,0  
,10.21747,9.028584,13.601936\C,0,10.500599,10.832117,15.131298\H,0,12.  
156863,12.143106,14.76145\H,0,15.581762,10.057832,10.641243\C,0,16.611  
204,8.559275,11.803622\C,0,15.748004,8.143727,13.982287\H,0,14.065936,  
9.331479,14.572071\H,0,12.836283,13.858384,11.826221\C,0,13.880569,15.  
019073,13.286834\C,0,15.328037,13.81918,14.752538\H,0,15.416241,11.699

841,14.473879\F,0,15.611325,5.992977,9.007483\H,0,9.670992,8.151772,13.277285\C,0,9.816492,9.711416,14.741398\H,0,10.169496,11.38684,16.000536\H,0,17.339359,8.341914,11.031939\C,0,16.646513,7.887341,12.984462\H,0,15.791191,7.594652,14.914865\H,0,13.461312,15.958452,12.948176\C,0,14.766995,15.001886,14.337175\H,0,16.05056,13.817253,15.559392\H,0,8.968557,9.360963,15.316858\H,0,17.40484,7.129779,13.139467\H,0,15.025198,15.926003,14.839272\\Version=ES64L-G09RevE.01\HF=-3155.6633942\RMSD=5.862e-09\Dipole=-0.000007,0.,0.0000059\Quadrupole=-13.0398074,-32.9635698,46.0033773,7.7396711,43.2034026,21.9609313\PG=C01 [X(C72H30Au2F26P2)]\@

## Compound 2c

1\1\GINC-COMPUTE040\SP\RB3LYP\Gen\C84H34Au2F30P2\CRAT\17-Sep-2020\0\#  
p b3lyp/gen pseudo=read counterpoise=2 empiricaldispersion=gd3bj nosym  
m gfprint\\CrystalExplorer Job symop = x+1/2, -y+1/2, z+1/2, r = 12.42  
23\0,1\F,0,7.463523,13.70021,-1.609834\C,0,8.138836,13.626987,-0.468798\C,0,9.276914,12.892916,-0.401574\C,0,7.735065,14.296986,0.65101\F,0,9.71301,12.219255,-1.500153\C,0,9.960066,12.803216,0.765998\F,0,6.600577,15.023734,0.55725\C,0,8.401895,14.258544,1.834503\F,0,11.085952,12.043517,0.820838\C,0,9.532567,13.509828,1.866346\C,0,7.919339,14.970646,3.069299\F,0,10.242269,13.381686,2.977308\C,0,7.159447,14.254882,3.99451\C,0,8.258155,16.303324,3.253279\Au,0,6.753403,12.270512,3.797262\C,0,6.723353,14.965155,5.130239\H,0,8.85154,16.818821,2.508333\C,0,7.83817,16.975153,4.396085\P,0,6.272816,10.051458,3.686342\C,0,7.066087,16.294175,3.08913\C,0,6.004399,14.296986,6.227049\C,0,8.184832,18.414005,4.680902\C,0,5.033016,9.652754,2.421827\C,0,5.604558,9.409284,5.238152\C,0,7.69647,9.008382,3.288661\H,0,6.717406,16.813328,6.193084\C,0,4.789371,13.744144,6.097909\C,0,6.573611,14.194471,7.49015\C,0,7.98177,19.402529,3.780456\C,0,8.647276,18.763649,5.912158\C,0,3.994187,10.527781,2.269689\C,0,5.077668,8.548902,1.615141\C,0,6.064059,9.931005,6.426952\C,0,4.625498,8.459202,5.292992\C,0,8.769074,9.592343,2.706644\C,0,7.747105,7.664722,3.569939\F,0,4.1208,13.828352,4.912647\C,0,4.161398,13.068653,7.166414\F,0,7.765901,14.750975,7.700666\C,0,5.966749,13.553762,8.519735\F,0,7.546317,19.135262,2.558044\C,0,8.198596,20.733376,4.093577\F,0,8.928812,17.864824,6.862138\C,0,8.905136,20.096327,6.255354\H,0,3.938395,11.409946,2.895578\C,0,3.018513,10.295294,1.325017\C,0,4.088934,8.307262,0.675776\H,0,5.901785,7.852908,1.712615\H,0,6.816466,10.709742,6.409792\C,0,5.582373,9.473354,7.644057\C,0,4.144681,7.996066,4.924207\H,0,4.222387,8.061779,4.369726\H,0,8.773628,10.660499,2.528324\C,0,9.872934,8.81983,2.335144\C,0,8.84661,6.92516,3.175441\H,0,6.932061,7.186752,4.099238\F,0,2.993164,12.484691,6.996585\C,0,4.785675,13.002751,8.369367\F,0,6.583515,13.493352,9.717381\F,0,8.044508,21.677965,3.182518\C,0,8.655381,21.05007,5.328373\F,0,9.333188,20.389221,7.479536\H,0,2.196081,10.991838,1.218343\C,0,3.08036,9.191442,0.521869\H,0,4.122635,7.410269,0.069701\H,0,5.970052,9.869496,8.5744\C,0,4.615062,8.521442,7.645826\H,0,3.39258,7.21714,6.51452\H,0,10.721494,9.288464,1.852193\C,0,9.885691,7.50546,2.568658\H,0,8.866489,5.858103,3.359776\F,0,4.176307,12.363872,9.3848\F,0,8.888641,22.336981,5.632649\H,0,2.325875,9.027969,-0.237583\H,0,4.214398,8.173079,8.58979\H,0,10.739655,6.910698,2.268804\F,0,0.221281,9.594174,-1.983103\C,0,-0.060255,8.69535,-2.933081\C,0,0.197605,7.362673,-2.589886\C,0,-0.522698,9.044994,-4.16434\F,0,0.625658,7.069777,-1.365705\C,0,-0.052149,6.408931,-3.516868\C,

0,-0.86936,10.483847,-4.449156\C,0,-0.725761,8.056471,-5.064785\F,0,0.  
18111,5.122019,-3.212591\C,0,-0.508934,6.725625,-4.751663\C,0,-0.44937  
6,11.155676,-5.591961\C,0,-1.641445,11.164829,-3.536327\F,0,-1.161213,  
8.323738,-6.287198\F,0,-0.663022,5.781035,-5.662723\C,0,-0.788192,12.4  
88354,-5.775942\H,0,0.144009,10.64018,-6.336908\H,0,-1.990125,10.64567  
1,-2.652157\C,0,-1.984177,12.493845,-3.715001\C,0,-1.548085,13.204118,  
-4.85073\C,0,-0.305636,13.200457,-7.010738\C,0,-2.703133,13.162014,-2.  
618191\Au,0,-1.954128,15.188488,-5.047979\C,0,-0.972466,13.162014,-8.1  
9423\C,0,0.825036,13.949173,-6.978895\C,0,-3.91816,13.714855,-2.747332  
\C,0,-2.133919,13.264528,-1.355091\P,0,-2.434714,17.407541,-5.158898\F  
,0,-2.106953,12.435266,-8.287991\C,0,-0.568695,13.832013,-9.314038\F,0  
,1.534738,14.077314,-5.867933\C,0,1.252535,14.655784,-8.079244\F,0,-4.  
58673,13.630648,-3.932594\C,0,-4.546133,14.390346,-1.678827\F,0,-0.941  
629,12.708025,-1.144574\C,0,-2.740782,13.905237,-0.325505\C,0,-3.67451  
6,17.806246,-6.423414\C,0,-3.102974,18.049717,-3.607089\C,0,-1.011062,  
18.450617,-5.556581\F,0,-1.244008,13.758791,-10.455074\C,0,0.569382,14  
.566085,-9.246815\F,0,2.378421,15.415483,-8.024402\F,0,-5.714367,14.97  
4308,-1.848655\C,0,-3.921856,14.456247,-0.475874\F,0,-2.124016,13.9656  
47,0.872141\C,0,-4.713345,16.931219,-6.575552\C,0,-3.629864,18.910099,  
-7.2301\C,0,-2.643472,17.527994,-2.418288\C,0,-4.082034,18.999798,-3.5  
52249\C,0,0.061543,17.866657,-6.138597\C,0,-0.960426,19.794277,-5.2753  
01\F,0,1.005479,15.239745,-10.345393\F,0,-4.531223,15.095127,0.53956\H  
,0,-4.769137,16.049053,-5.949662\C,0,-5.689018,17.163706,-7.520224\C,0  
, -4.618597,19.151737,-8.169464\H,0,-2.805746,19.606092,-7.132626\H,0,-  
1.891065,16.749258,-2.435448\C,0,-3.125158,17.985645,-1.201184\C,0,-4.  
56285,19.462938,-2.352834\H,0,-4.485145,19.397221,-4.475515\H,0,0.0660  
97,16.7985,-6.316917\C,0,1.165403,18.63917,-6.510097\C,0,0.139078,20.5  
3384,-5.669799\H,0,-1.775471,20.272247,-4.746003\H,0,-6.51145,16.46716  
3,-7.626897\C,0,-5.627172,18.267557,-8.323371\H,0,-4.584897,20.048731,  
-8.77554\H,0,-2.737479,17.589502,-0.270841\C,0,-4.09247,18.937557,-1.1  
99414\H,0,-5.314952,20.241859,-2.330721\H,0,2.013962,18.170536,-6.9930  
47\C,0,1.17816,19.953541,-6.276582\H,0,0.158958,21.600897,-5.485464\H,  
0,-6.381656,18.43103,-9.082824\H,0,-4.493134,19.285919,-0.255451\H,0,2  
.032124,20.548302,-6.576437\\Version=ES64L-G09RevE.01\HF=-3585.1434335  
\RMSD=6.089e-09\Dipole=-1.9427974,0.0559585,-0.734828\Quadrupole=-17.6  
807036,41.398958,-23.7182544,-102.4744601,-4.4284203,-72.2475315\Pg=C0  
1[X(C84H34Au2F30P2)]\@

1\1\GINC-COMPUTE040\SP\RB3LYP\Gen\C84H34Au2F30P2\CRAT\17-Sep-2020\0\#\#  
p b3lyp/gen pseudo=read counterpoise=2 empiricaldispersion=gd3bj nosym  
m gfpriint\CystalExplorer Job symop = -x+1/2, y+1/2, -z+1/2, r = 10.6  
421\0,1\F,0,7.463523,13.70021,-1.609834\C,0,8.138836,13.626987,-0.468  
798\C,0,9.276914,12.892916,-0.401574\C,0,7.735065,14.296986,0.65101\F,  
0,9.71301,12.219255,-1.500153\C,0,9.960066,12.803216,0.765998\F,0,6.60  
0577,15.023734,0.55725\C,0,8.401895,14.258544,1.834503\F,0,11.085952,1  
2.043517,0.820838\C,0,9.532567,13.509828,1.866346\C,0,7.919339,14.9706  
46,3.069299\F,0,10.242269,13.381686,2.977308\C,0,7.159447,14.254882,3.  
99451\C,0,8.258155,16.303324,3.253279\Au,0,6.753403,12.270512,3.797262  
\C,0,6.723353,14.965155,5.130239\H,0,8.85154,16.818821,2.508333\C,0,7.  
83817,16.975153,4.396085\P,0,6.272816,10.051458,3.686342\C,0,7.066087,  
16.29417,5.308913\C,0,6.004399,14.296986,6.227049\C,0,8.184832,18.4140  
05,4.680902\C,0,5.033016,9.652754,2.421827\C,0,5.604558,9.409284,5.238  
152\C,0,7.69647,9.008382,3.288661\H,0,6.717406,16.813328,6.193084\C,0,

4.789371,13.744144,6.097909\C,0,6.573611,14.194471,7.49015\C,0,7.98177  
,19.402529,3.780456\C,0,8.647276,18.763649,5.912158\C,0,3.994187,10.52  
7781,2.269689\C,0,5.077668,8.548902,1.615141\C,0,6.064059,9.931005,6.4  
26952\C,0,4.625498,8.459202,5.292992\C,0,8.769074,9.592343,2.706644\C,  
0,7.747105,7.664722,3.569939\F,0,4.1208,13.828352,4.912647\C,0,4.16139  
8,13.068653,7.166414\F,0,7.765901,14.750975,7.700666\C,0,5.966749,13.5  
53762,8.519735\F,0,7.546317,19.135262,2.558044\C,0,8.198596,20.733376,  
4.093577\F,0,8.928812,17.864824,6.862138\C,0,8.905136,20.096327,6.2553  
54\H,0,3.938395,11.409946,2.895578\C,0,3.018513,10.295294,1.325017\C,0  
,4.088934,8.307262,0.675776\H,0,5.901785,7.852908,1.712615\H,0,6.81646  
6,10.709742,6.409792\C,0,5.582373,9.473354,7.644057\C,0,4.144681,7.996  
06,6.492407\H,0,4.222387,8.061779,4.369726\H,0,8.773628,10.660499,2.52  
8324\C,0,9.872934,8.81983,2.335144\C,0,8.84661,6.92516,3.175441\H,0,6.  
932061,7.186752,4.099238\F,0,2.993164,12.484691,6.996585\C,0,4.785675,  
13.002751,8.369367\F,0,6.583515,13.493352,9.717381\F,0,8.044508,21.677  
965,3.182518\C,0,8.655381,21.05007,5.328373\F,0,9.333188,20.389221,7.4  
79536\H,0,2.196081,10.991838,1.218343\C,0,3.08036,9.191442,0.521869\H,  
0,4.122635,7.410269,0.069701\H,0,5.970052,9.869496,8.5744\C,0,4.615062  
,8.521442,7.645826\H,0,3.39258,7.21714,6.51452\H,0,10.721494,9.288464,  
1.852193\C,0,9.885691,7.50546,2.568658\H,0,8.866489,5.858103,3.359776\  
F,0,4.176307,12.363872,9.3848\F,0,8.888641,22.336981,5.632649\H,0,2.32  
5875,9.027969,-0.237583\H,0,4.214398,8.173079,8.58979\H,0,10.739655,6.  
910698,2.268804\F,0,-0.625659,11.236222,1.365705\C,0,-0.197606,10.9433  
27,2.589886\C,0,0.052148,11.897069,3.516868\C,0,0.060253,9.610649,2.93  
3082\F,0,-0.181112,13.183981,3.212591\C,0,0.508933,11.580376,4.751663\  
F,0,-0.221282,8.711825,1.983103\C,0,0.522698,9.261005,4.16434\F,0,0.66  
3021,12.524964,5.662723\C,0,0.72576,10.249529,5.064785\C,0,0.86936,7.8  
22154,4.449156\F,0,1.161213,9.982262,6.287197\C,0,0.449375,7.150323,5.  
591961\C,0,1.641443,7.141171,3.536327\C,0,0.788191,5.817646,5.775942\H  
,0,-0.14401,7.66582,6.336907\H,0,1.990124,7.660329,2.652157\C,0,1.9841  
77,5.812155,3.715001\C,0,1.548084,5.101882,4.85073\C,0,0.305636,5.1055  
43,7.010737\C,0,2.703132,5.143986,2.618191\Au,0,1.954128,3.117512,5.04  
7979\C,0,0.972464,5.143985,8.194231\C,0,-0.825037,4.356828,6.978895\C,  
0,2.133919,5.041472,1.355091\C,0,3.918159,4.591145,2.747332\p,0,2.4347  
14,0.898458,5.158898\F,0,2.106953,5.870733,8.287991\C,0,0.568694,4.473  
986,9.314038\F,0,-1.534738,4.228686,5.867933\C,0,-1.252535,3.650216,8.  
079243\C,0,2.740782,4.400763,0.325505\F,0,0.941629,5.597974,1.144574\F  
,0,4.58673,4.675352,3.932594\C,0,4.546132,3.915653,1.678827\C,0,3.6745  
15,0.499753,6.423414\C,0,3.102973,0.256284,3.607089\C,0,1.011061,-0.14  
4618,5.55658\F,0,1.244007,4.54721,10.455074\C,0,-0.569383,3.739915,9.2  
46815\F,0,-2.378421,2.890517,8.024402\F,0,2.124015,4.340353,-0.872141\  
C,0,3.921855,3.849752,0.475874\F,0,5.714365,3.331692,1.848655\C,0,4.71  
3344,1.37478,6.575552\C,0,3.629863,-0.604098,7.2301\C,0,2.643471,0.778  
005,2.418289\C,0,4.082033,-0.693797,3.552249\C,0,-0.061544,0.439344,6.  
138597\C,0,0.960425,-1.488279,5.275301\F,0,-1.00548,3.066254,10.345393  
\F,0,4.531223,3.210872,-0.53956\H,0,4.769136,2.256946,5.949663\C,0,5.6  
89018,1.142294,7.520224\C,0,4.618597,-0.845737,8.169464\H,0,2.805746,-  
1.300093,7.132625\H,0,1.891065,1.556742,2.435448\C,0,3.125158,0.320355  
,1.201184\C,0,4.56285,-1.156939,2.352834\H,0,4.485144,-1.091221,4.4755  
15\H,0,-0.066098,1.507499,6.316917\C,0,-1.165404,-0.333169,6.510097\C,  
0,-0.139079,-2.22784,5.669799\H,0,1.77547,-1.966248,4.746002\H,0,6.511  
449,1.838837,7.626897\C,0,5.627171,0.038442,8.323371\H,0,4.584896,-1.7  
42732,8.77554\H,0,2.737478,0.716497,0.270841\C,0,4.092468,-0.631557,1.

199415\H,0,5.314951,-1.93586,2.330721\H,0,-2.013963,0.135464,6.993047\  
C,0,-1.17816,-1.64754,6.276582\H,0,-0.158959,-3.294897,5.485464\H,0,6.  
381656,-0.12503,9.082824\H,0,4.493133,-0.97992,0.255451\H,0,-2.032124,  
-2.242302,6.576437\\Version=ES64L-G09RevE.01\HF=-3585.1433963\RMSD=6.0  
89e-09\Dipole=-0.331143,-6.5497803,0.1807102\Quadrupole=55.3105391,-10  
9.8695915,54.5590524,-74.4897628,-4.8650484,-56.8120083\PG=C01 [X(C84H  
34Au2F30P2)]\@

1\1\GINC-COMPUTE035\SP\RB3LYP\Gen\C84H34Au2F30P2\CRAT\17-Sep-2020\0\#\#  
p b3lyp/gen pseudo=read counterpoise=2 empiricaldispersion=gd3bj nosym  
m gfpriint\CystalExplorer Job symop = -x+1/2, -y+1/2, -z, r = 8.63074  
\0,1\F,0,7.463523,13.70021,-1.609834\C,0,8.138836,13.626987,-0.468798  
\C,0,9.276914,12.892916,-0.401574\C,0,7.735065,14.296986,0.65101\F,0,9  
.71301,12.219255,-1.500153\C,0,9.960066,12.803216,0.765998\F,0,6.60057  
7,15.023734,0.55725\C,0,8.401895,14.258544,1.834503\F,0,11.085952,12.0  
43517,0.820838\C,0,9.532567,13.509828,1.866346\C,0,7.919339,14.970646,  
3.069299\F,0,10.242269,13.381686,2.977308\C,0,7.159447,14.254882,3.994  
51\C,0,8.258155,16.303324,3.253279\Au,0,6.753403,12.270512,3.797262\C,  
0,6.723353,14.965155,5.130239\H,0,8.85154,16.818821,2.508333\C,0,7.838  
17,16.975153,4.396085\P,0,6.272816,10.051458,3.686342\C,0,7.066087,16.  
29417,5.308913\C,0,6.004399,14.296986,6.227049\C,0,8.184832,18.414005,  
4.680902\C,0,5.033016,9.652754,2.421827\C,0,5.604558,9.409284,5.238152  
\C,0,7.69647,9.008382,3.288661\H,0,6.717406,16.813328,6.193084\C,0,4.7  
89371,13.744144,6.097909\C,0,6.573611,14.194471,7.49015\C,0,7.98177,19  
.402529,3.780456\C,0,8.647276,18.763649,5.912158\C,0,3.994187,10.52778  
1,2.269689\C,0,5.077668,8.548902,1.615141\C,0,6.064059,9.931005,6.4269  
52\C,0,4.625498,8.459202,5.292992\C,0,8.769074,9.592343,2.706644\C,0,7  
.747105,7.664722,3.569939\F,0,4.1208,13.828352,4.912647\C,0,4.161398,1  
3.068653,7.166414\F,0,7.765901,14.750975,7.700666\C,0,5.966749,13.5537  
62,8.519735\F,0,7.546317,19.135262,2.558044\C,0,8.198596,20.733376,4.0  
93577\F,0,8.928812,17.864824,6.862138\C,0,8.905136,20.096327,6.255354\  
H,0,3.938395,11.409946,2.895578\C,0,3.018513,10.295294,1.325017\C,0,4.  
088934,8.307262,0.675776\H,0,5.901785,7.852908,1.712615\H,0,6.816466,1  
0.709742,6.409792\C,0,5.582373,9.473354,7.644057\C,0,4.144681,7.99606,  
6.492407\H,0,4.222387,8.061779,4.369726\H,0,8.773628,10.660499,2.52832  
4\C,0,9.872934,8.81983,2.335144\C,0,8.84661,6.92516,3.175441\H,0,6.932  
061,7.186752,4.099238\F,0,2.993164,12.484691,6.996585\C,0,4.785675,13.  
002751,8.369367\F,0,6.583515,13.493352,9.717381\F,0,8.044508,21.677965  
,3.182518\C,0,8.655381,21.05007,5.328373\F,0,9.333188,20.389221,7.4795  
36\H,0,2.196081,10.991838,1.218343\C,0,3.08036,9.191442,0.521869\H,0,4  
.122635,7.410269,0.069701\H,0,5.970052,9.869496,8.5744\C,0,4.615062,8.  
521442,7.645826\H,0,3.39258,7.21714,6.51452\H,0,10.721494,9.288464,1.8  
52193\C,0,9.885691,7.50546,2.568658\H,0,8.866489,5.858103,3.359776\F,0  
,4.176307,12.363872,9.3848\F,0,8.888641,22.336981,5.632649\H,0,2.32587  
5,9.027969,-0.237583\H,0,4.214398,8.173079,8.58979\H,0,10.739655,6.910  
698,2.268804\F,0,4.826921,12.435266,-0.55725\C,0,3.692433,13.162014,-0  
.65101\C,0,3.288662,13.832013,0.468798\C,0,3.025604,13.200456,-1.83450  
3\F,0,3.963975,13.75879,1.609834\C,0,2.150585,14.566084,0.401574\C,0,3  
.50816,12.488354,-3.069299\C,0,1.894932,13.949172,-1.866345\F,0,1.7144  
89,15.239744,1.500153\C,0,1.467433,14.655784,-0.765997\C,0,3.169343,11  
.155676,-3.253279\C,0,4.268052,13.204118,-3.99451\F,0,1.18523,14.07731  
3,-2.977308\F,0,0.341547,15.415483,-0.820839\H,0,2.575959,10.64018,-2.  
508333\C,0,3.589329,10.483847,-4.396084\C,0,4.704145,12.493845,-5.1302



4\Au,0,4.674096,15.188488,-3.797261\C,0,3.242666,9.044995,-4.680901\C,  
0,4.361412,11.164829,-5.308914\C,0,5.4231,13.162014,-6.227049\P,0,5.15  
4682,17.407541,-3.686342\C,0,3.445729,8.056471,-3.780456\C,0,2.780222,  
8.69535,-5.912159\H,0,4.710093,10.645671,-6.193084\C,0,6.638128,13.714  
855,-6.097908\C,0,4.853887,13.264528,-7.490149\C,0,6.394483,17.806246,  
-2.421827\C,0,5.822941,18.049717,-5.238152\C,0,3.731029,18.450617,-3.2  
8866\F,0,3.881181,8.323738,-2.558043\C,0,3.228902,6.725625,-4.093577\C  
,0,2.522363,7.362674,-6.255354\F,0,2.498686,9.594175,-6.862138\F,0,7.3  
06698,13.630648,-4.912647\C,0,7.2661,14.390347,-7.166414\F,0,3.661597,  
12.708025,-7.700666\C,0,5.46075,13.905237,-8.519735\C,0,7.433311,16.93  
1219,-2.269689\C,0,6.349831,18.910097,-1.615141\C,0,5.36344,17.527994,  
-6.426952\C,0,6.802001,18.999798,-5.292992\C,0,2.658424,17.866655,-2.7  
06644\C,0,3.680393,19.794277,-3.569939\F,0,3.38299,5.781035,-3.182517\  
C,0,2.772117,6.408931,-5.328372\F,0,2.09431,7.069778,-7.479536\F,0,8.4  
34334,14.974309,-6.996585\C,0,6.641824,14.456248,-8.369367\F,0,4.84398  
3,13.965648,-9.717381\H,0,7.489104,16.049053,-2.895578\C,0,8.408986,17  
.163706,-1.325016\C,0,7.338565,19.151737,-0.675777\H,0,5.525713,19.606  
092,-1.712615\H,0,4.611033,16.749258,-6.409792\C,0,5.845126,17.985645,  
-7.644057\C,0,7.282817,19.46294,-6.492406\H,0,7.205112,19.397221,-4.36  
9726\H,0,2.653871,16.7985,-2.528324\C,0,1.554564,18.63917,-2.335144\C,  
0,2.580889,20.53384,-3.175441\H,0,4.495438,20.272247,-4.099238\F,0,2.5  
38857,5.122019,-5.632649\F,0,7.251191,15.095128,-9.3848\H,0,9.231417,1  
6.467163,-1.218344\C,0,8.347138,18.267557,-0.521869\H,0,7.304863,20.04  
8731,-0.0697\H,0,5.457447,17.589504,-8.5744\C,0,6.812436,18.937557,-7.  
645826\H,0,8.034919,20.241859,-6.51452\H,0,0.706005,18.170536,-1.85219  
4\C,0,1.541808,19.953541,-2.568658\H,0,2.561009,21.600897,-3.359776\H,  
0,9.101624,18.43103,0.237583\H,0,7.213101,19.285921,-8.58979\H,0,0.687  
844,20.548302,-2.268804\Version=ES64L-G09RevE.01\HF=-3585.1434029\RMS  
D=6.089e-09\Dipole=0.0000005,0.0000034,0.000002\Quadrupole=-6.4018065,  
38.4825654,-32.0807589,-8.2054333,-17.2964529,-46.30693\PG=C01 [X(C84H  
34Au2F30P2)]\@

1\1\GINC-COMPUTE041\SP\RB3LYP\Gen\C84H34Au2F30P2\CRAT\17-Sep-2020\0\#\#  
p b3lyp/gen pseudo=read counterpoise=2 empiricaldispersion=gd3bj nosym  
m gfprint\CrystalExplorer Job symop = -x, -y, -z, r = 14.7861\0,1\F,  
0,7.463523,13.70021,-1.609834\C,0,8.138836,13.626987,-0.468798\C,0,9.2  
76914,12.892916,-0.401574\C,0,7.735065,14.296986,0.65101\F,0,9.71301,1  
2.219255,-1.500153\C,0,9.960066,12.803216,0.765998\F,0,6.600577,15.023  
734,0.55725\C,0,8.401895,14.258544,1.834503\F,0,11.085952,12.043517,0.  
820838\C,0,9.532567,13.509828,1.866346\C,0,7.919339,14.970646,3.069299  
\F,0,10.242269,13.381686,2.977308\C,0,7.159447,14.254882,3.99451\C,0,8  
.258155,16.303324,3.253279\Au,0,6.753403,12.270512,3.797262\C,0,6.7233  
53,14.965155,5.130239\H,0,8.85154,16.818821,2.508333\C,0,7.83817,16.97  
5153,4.396085\P,0,6.272816,10.051458,3.686342\C,0,7.066087,16.29417,5.  
308913\C,0,6.004399,14.296986,6.227049\C,0,8.184832,18.414005,4.680902  
\C,0,5.033016,9.652754,2.421827\C,0,5.604558,9.409284,5.238152\C,0,7.6  
9647,9.008382,3.288661\H,0,6.717406,16.813328,6.193084\C,0,4.789371,13  
.744144,6.097909\C,0,6.573611,14.194471,7.49015\C,0,7.98177,19.402529,  
3.780456\C,0,8.647276,18.763649,5.912158\C,0,3.994187,10.527781,2.2696  
89\C,0,5.077668,8.548902,1.615141\C,0,6.064059,9.931005,6.426952\C,0,4  
.625498,8.459202,5.292992\C,0,8.769074,9.592343,2.706644\C,0,7.747105,  
7.664722,3.569939\F,0,4.1208,13.828352,4.912647\C,0,4.161398,13.068653  
,7.166414\F,0,7.765901,14.750975,7.700666\C,0,5.966749,13.553762,8.519

735\F,0,7.546317,19.135262,2.558044\C,0,8.198596,20.733376,4.093577\F,  
0,8.928812,17.864824,6.862138\C,0,8.905136,20.096327,6.255354\H,0,3.93  
8395,11.409946,2.895578\C,0,3.018513,10.295294,1.325017\C,0,4.088934,8  
.307262,0.675776\H,0,5.901785,7.852908,1.712615\H,0,6.816466,10.709742  
,6.409792\C,0,5.582373,9.473354,7.644057\C,0,4.144681,7.99606,6.492407  
\H,0,4.222387,8.061779,4.369726\H,0,8.773628,10.660499,2.528324\C,0,9.  
872934,8.81983,2.335144\C,0,8.84661,6.92516,3.175441\H,0,6.932061,7.18  
6752,4.099238\F,0,2.993164,12.484691,6.996585\C,0,4.785675,13.002751,8  
.369367\F,0,6.583515,13.493352,9.717381\F,0,8.044508,21.677965,3.18251  
8\C,0,8.655381,21.05007,5.328373\F,0,9.333188,20.389221,7.479536\H,0,2  
.196081,10.991838,1.218343\C,0,3.08036,9.191442,0.521869\H,0,4.122635,  
7.410269,0.069701\H,0,5.970052,9.869496,8.5744\C,0,4.615062,8.521442,7  
.645826\H,0,3.39258,7.21714,6.51452\H,0,10.721494,9.288464,1.852193\C,  
0,9.885691,7.50546,2.568658\H,0,8.866489,5.858103,3.359776\F,0,4.17630  
7,12.363872,9.3848\F,0,8.888641,22.336981,5.632649\H,0,2.325875,9.0279  
69,-0.237583\H,0,4.214398,8.173079,8.58979\H,0,10.739655,6.910698,2.26  
8804\F,0,11.769047,6.262483,-0.820839\C,0,12.894934,5.502783,-0.765997  
\C,0,13.578085,5.413085,0.401574\C,0,13.322432,4.796172,-1.866345\F,0,  
13.141989,6.086745,1.500153\C,0,14.716163,4.679014,0.468798\F,0,12.612  
73,4.924314,-2.977308\C,0,14.453104,4.047457,-1.834503\F,0,15.391476,4  
.605789,1.609834\C,0,15.119934,4.009014,-0.65101\C,0,14.93566,3.335353  
,-3.069299\F,0,16.254421,3.282266,-0.55725\C,0,15.695553,4.051118,-3.9  
9451\C,0,14.596844,2.002676,-3.253279\Au,0,16.101595,6.035488,-3.79726  
1\C,0,16.131645,3.340845,-5.13024\H,0,14.003459,1.48718,-2.508333\C,0,  
15.016828,1.330846,-4.396084\p,0,16.582182,8.254541,-3.686342\C,0,15.7  
88913,2.01183,-5.308914\C,0,16.850601,4.009014,-6.227049\C,0,14.670166  
,-0.108006,-4.680901\C,0,15.158529,9.297618,-3.28866\C,0,17.821983,8.6  
53246,-2.421827\C,0,17.250443,8.896716,-5.238152\H,0,16.137592,1.49267  
2,-6.193084\C,0,18.065628,4.561855,-6.097908\C,0,16.281387,4.111528,-7  
.490149\C,0,14.873229,-1.096529,-3.780456\C,0,14.207723,-0.457649,-5.9  
12159\C,0,14.085925,8.713656,-2.706644\C,0,15.107893,10.641278,-3.5699  
39\C,0,18.860813,7.778219,-2.269689\C,0,17.77733,9.757098,-1.615141\C,  
0,16.790939,8.374995,-6.426952\C,0,18.229502,9.846797,-5.292992\F,0,18  
.734198,4.477648,-4.912647\C,0,18.6936,5.237347,-7.166414\F,0,15.08909  
7,3.555026,-7.700666\C,0,16.88825,4.752238,-8.519735\F,0,15.308681,-0.  
829262,-2.558043\C,0,14.656403,-2.427376,-4.093577\F,0,13.926187,0.441  
175,-6.862138\C,0,13.949862,-1.790327,-6.255354\C,0,12.982064,9.486169  
,-2.335144\H,0,14.08137,7.645501,-2.528324\C,0,14.008389,11.38084,-3.1  
75441\H,0,15.922938,11.119247,-4.099238\H,0,18.916605,6.896053,-2.8955  
78\C,0,19.836485,8.010705,-1.325016\C,0,18.766064,9.998736,-0.675777\H  
,0,16.953213,10.453093,-1.712615\H,0,16.038532,7.596258,-6.409792\C,0,  
17.272625,8.832645,-7.644057\C,0,18.710318,10.309939,-6.492406\H,0,18.  
632612,10.244221,-4.369726\F,0,19.861835,5.821308,-6.996585\C,0,18.069  
323,5.303249,-8.369367\F,0,16.271482,4.812648,-9.717381\F,0,14.810491,  
-3.371965,-3.182517\C,0,14.199617,-2.744069,-5.328372\F,0,13.521811,-2  
.083222,-7.479536\C,0,12.969307,10.80054,-2.568658\H,0,12.133506,9.017  
535,-1.852194\H,0,13.988509,12.447897,-3.359776\H,0,20.658918,7.314162  
,-1.218344\C,0,19.774639,9.114557,-0.521869\H,0,18.732363,10.895731,-0  
.0697\H,0,16.884947,8.436503,-8.5744\C,0,18.239937,9.784557,-7.645826\  
H,0,19.46242,11.088861,-6.51452\F,0,18.678692,5.942128,-9.3848\F,0,13.  
966358,-4.030981,-5.632649\H,0,12.115344,11.395302,-2.268804\H,0,20.52  
9123,9.278029,0.237583\H,0,18.640602,10.13292,-8.58979\\Version=ES64L-  
G09RevE.01\HF=-3585.1434328\RMSD=6.089e-09\Dipole=-0.0000017,-0.000001

8,0.000017\Quadrupole=55.7234222,-47.5365163,-8.1869059,46.4683894,-1  
1.0448329,-50.6282988\PG=C01 [X(C84H34Au2F30P2)]\ \@

1\1\GINC-COMPUTE008\SP\RB3LYP\Gen\C84H34Au2F30P2\CRAT\17-Sep-2020\0\#\#  
p b3lyp/gen pseudo=read counterpoise=2 empiricaldispersion=gd3bj nosym  
m gfpint\CystalExplorer Job symop = x, -y, z+1/2, r = 12.6673\0,1\  
F,0,7.463523,13.70021,-1.609834\C,0,8.138836,13.626987,-0.468798\C,0,9  
.276914,12.892916,-0.401574\C,0,7.735065,14.296986,0.65101\F,0,9.71301  
,12.219255,-1.500153\C,0,9.960066,12.803216,0.765998\F,0,6.600577,15.0  
23734,0.55725\C,0,8.401895,14.258544,1.834503\F,0,11.085952,12.043517,  
0.820838\C,0,9.532567,13.509828,1.866346\C,0,7.919339,14.970646,3.0692  
99\F,0,10.242269,13.381686,2.977308\C,0,7.159447,14.254882,3.99451\C,0  
,8.258155,16.303324,3.253279\Au,0,6.753403,12.270512,3.797262\C,0,6.72  
3353,14.965155,5.130239\H,0,8.85154,16.818821,2.508333\C,0,7.83817,16.  
975153,4.396085\P,0,6.272816,10.051458,3.686342\C,0,7.066087,16.29417,  
5.308913\C,0,6.004399,14.296986,6.227049\C,0,8.184832,18.414005,4.6809  
02\C,0,5.033016,9.652754,2.421827\C,0,5.604558,9.409284,5.238152\C,0,7  
.69647,9.008382,3.288661\H,0,6.717406,16.813328,6.193084\C,0,4.789371,  
13.744144,6.097909\C,0,6.573611,14.194471,7.49015\C,0,7.98177,19.40252  
9,3.780456\C,0,8.647276,18.763649,5.912158\C,0,3.994187,10.527781,2.26  
9689\C,0,5.077668,8.548902,1.615141\C,0,6.064059,9.931005,6.426952\C,0  
,4.625498,8.459202,5.292992\C,0,8.769074,9.592343,2.706644\C,0,7.74710  
5,7.664722,3.569939\F,0,4.1208,13.828352,4.912647\C,0,4.161398,13.0686  
53,7.166414\F,0,7.765901,14.750975,7.700666\C,0,5.966749,13.553762,8.5  
19735\F,0,7.546317,19.135262,2.558044\C,0,8.198596,20.733376,4.093577\  
F,0,8.928812,17.864824,6.862138\C,0,8.905136,20.096327,6.255354\H,0,3.  
938395,11.409946,2.895578\C,0,3.018513,10.295294,1.325017\C,0,4.088934  
,8.307262,0.675776\H,0,5.901785,7.852908,1.712615\H,0,6.816466,10.7097  
42,6.409792\C,0,5.582373,9.473354,7.644057\C,0,4.144681,7.99606,6.4924  
07\H,0,4.222387,8.061779,4.369726\H,0,8.773628,10.660499,2.528324\C,0,  
9.872934,8.81983,2.335144\C,0,8.84661,6.92516,3.175441\H,0,6.932061,7.  
186752,4.099238\F,0,2.993164,12.484691,6.996585\C,0,4.785675,13.002751  
,8.369367\F,0,6.583515,13.493352,9.717381\F,0,8.044508,21.677965,3.182  
518\C,0,8.655381,21.05007,5.328373\F,0,9.333188,20.389221,7.479536\H,0  
,2.196081,10.991838,1.218343\C,0,3.08036,9.191442,0.521869\H,0,4.12263  
5,7.410269,0.069701\H,0,5.970052,9.869496,8.5744\C,0,4.615062,8.521442  
,7.645826\H,0,3.39258,7.21714,6.51452\H,0,10.721494,9.288464,1.852193\  
C,0,9.885691,7.50546,2.568658\H,0,8.866489,5.858103,3.359776\F,0,4.176  
307,12.363872,9.3848\F,0,8.888641,22.336981,5.632649\H,0,2.325875,9.02  
7969,-0.237583\H,0,4.214398,8.173079,8.58979\H,0,10.739655,6.910698,2.  
268804\F,0,5.713133,5.821308,-1.848655\C,0,6.881367,5.237347,-1.678827  
\C,0,7.505644,5.303248,-0.475874\C,0,7.50934,4.561855,-2.747332\F,0,6.  
896276,5.942128,0.53956\C,0,8.686718,4.752238,-0.325505\F,0,6.84077,4.  
477648,-3.932594\C,0,8.724368,4.009014,-2.618191\F,0,9.303485,4.812647  
,0.872141\C,0,9.293581,4.111527,-1.355091\C,0,9.443323,3.340845,-3.715  
001\F,0,10.48587,3.555025,-1.144574\C,0,9.879416,4.051118,-4.85073\C,0  
,9.786057,2.01183,-3.536327\Au,0,9.473372,6.035488,-5.047979\C,0,10.63  
9309,3.335353,-5.775942\C,0,10.55814,1.330846,-4.449156\H,0,9.437375,1  
.492671,-2.652157\P,0,8.992785,8.254541,-5.158898\C,0,10.978125,2.0026  
77,-5.591961\C,0,11.121863,4.047457,-7.010738\C,0,10.904801,-0.108006,  
-4.16434\C,0,8.324526,8.896716,-3.607089\C,0,10.416439,9.297618,-5.556  
581\C,0,7.752985,8.653247,-6.423414\H,0,11.571509,1.48718,-6.336908\C,  
0,10.455035,4.009015,-8.19423\C,0,12.252536,4.796172,-6.978895\C,0,10.

701739,-1.096529,-5.064785\C,0,11.367246,-0.457649,-2.933081\C,0,8.784  
028,8.374995,-2.418288\C,0,7.345467,9.846797,-3.552249\C,0,10.467073,1  
0.641278,-5.275301\C,0,11.489043,8.713656,-6.138597\C,0,6.714156,7.778  
22,-6.575552\C,0,7.797637,9.757098,-7.2301\F,0,9.320547,3.282266,-8.28  
7991\C,0,10.858806,4.679014,-9.314038\F,0,12.962238,4.924314,-5.867933  
\C,0,12.680035,5.502784,-8.079244\F,0,10.266287,-0.829262,-6.287198\C,  
0,10.918566,-2.427376,-4.751663\F,0,11.648782,0.441175,-1.983103\C,0,1  
1.625106,-1.790327,-2.589886\C,0,8.302341,8.832644,-1.201184\H,0,9.536  
435,7.596258,-2.435448\C,0,6.86465,10.309939,-2.352834\H,0,6.942356,10  
.244221,-4.475515\H,0,9.652029,11.119247,-4.746003\C,0,11.566579,11.38  
084,-5.669799\H,0,11.493597,7.645502,-6.316917\C,0,12.592903,9.486169,  
-6.510097\H,0,6.658364,6.896053,-5.949662\C,0,5.738482,8.010706,-7.520  
224\C,0,6.808902,9.998737,-8.169464\H,0,8.621754,10.453093,-7.132626\F  
,0,10.183492,4.60579,-10.455074\C,0,11.996882,5.413085,-9.246815\F,0,1  
3.805921,6.262483,-8.024402\F,0,10.764479,-3.371965,-5.662723\C,0,11.3  
75352,-2.74407,-3.516868\F,0,12.053158,-2.083222,-1.365705\H,0,8.69002  
1,8.436503,-0.270841\C,0,7.335031,9.784557,-1.199414\H,0,6.112548,11.0  
8886,-2.330721\C,0,12.605659,10.80054,-6.276582\H,0,11.586458,12.44789  
7,-5.485464\H,0,13.441463,9.017536,-6.993047\H,0,4.91605,7.314162,-7.6  
26897\C,0,5.800329,9.114558,-8.323371\H,0,6.842604,10.895732,-8.77554\  
F,0,12.432979,6.086746,-10.345393\F,0,11.608611,-4.030981,-3.212591\H,  
0,6.934367,10.132919,-0.255451\H,0,13.459623,11.395302,-6.576437\H,0,5  
.045844,9.27803,-9.082824\\Version=ES64L-G09RevE.01\HF=-3585.1434182\R  
MSD=6.089e-09\Dipole=-1.6839393,-0.1022657,-0.4602037\Quadrupole=-1.89  
99081,-25.0620546,26.9619627,-14.0526605,-7.9846975,-61.2203006\PG=C01  
[X(C84H34Au2F30P2)]\@\@

1\1\GINC-COMPUTE021\SP\RB3LYP\Gen\C84H34Au2F30P2\CRAT\17-Sep-2020\0\#\#  
p b3lyp/gen pseudo=read counterpoise=2 empiricaldispersion=gd3bj nosym  
m gfpint\CystalExplorer Job symop = -x, y, -z+1/2, r = 6.07284\0,1  
\F,0,7.463523,13.70021,-1.609834\C,0,8.138836,13.626987,-0.468798\C,0,  
9.276914,12.892916,-0.401574\C,0,7.735065,14.296986,0.65101\F,0,9.7130  
1,12.219255,-1.500153\C,0,9.960066,12.803216,0.765998\F,0,6.600577,15.  
023734,0.55725\C,0,8.401895,14.258544,1.834503\F,0,11.085952,12.043517  
,0.820838\C,0,9.532567,13.509828,1.866346\C,0,7.919339,14.970646,3.069  
299\F,0,10.242269,13.381686,2.977308\C,0,7.159447,14.254882,3.99451\C,  
0,8.258155,16.303324,3.253279\Au,0,6.753403,12.270512,3.797262\C,0,6.7  
23353,14.965155,5.130239\H,0,8.85154,16.818821,2.508333\C,0,7.83817,16  
.975153,4.396085\p,0,6.272816,10.051458,3.686342\C,0,7.066087,16.29417  
,5.308913\C,0,6.004399,14.296986,6.227049\C,0,8.184832,18.414005,4.680  
902\C,0,5.033016,9.652754,2.421827\C,0,5.604558,9.409284,5.238152\C,0,  
7.69647,9.008382,3.288661\H,0,6.717406,16.813328,6.193084\C,0,4.789371  
,13.744144,6.097909\C,0,6.573611,14.194471,7.49015\C,0,7.98177,19.4025  
29,3.780456\C,0,8.647276,18.763649,5.912158\C,0,3.994187,10.527781,2.2  
69689\C,0,5.077668,8.548902,1.615141\C,0,6.064059,9.931005,6.426952\C,  
0,4.625498,8.459202,5.292992\C,0,8.769074,9.592343,2.706644\C,0,7.7471  
05,7.664722,3.569939\F,0,4.1208,13.828352,4.912647\C,0,4.161398,13.068  
653,7.166414\F,0,7.765901,14.750975,7.700666\C,0,5.966749,13.553762,8.  
519735\F,0,7.546317,19.135262,2.558044\C,0,8.198596,20.733376,4.093577  
\F,0,8.928812,17.864824,6.862138\C,0,8.905136,20.096327,6.255354\H,0,3  
.938395,11.409946,2.895578\C,0,3.018513,10.295294,1.325017\C,0,4.08893  
4,8.307262,0.675776\H,0,5.901785,7.852908,1.712615\H,0,6.816466,10.709  
742,6.409792\C,0,5.582373,9.473354,7.644057\C,0,4.144681,7.99606,6.492

407\H,0,4.222387,8.061779,4.369726\H,0,8.773628,10.660499,2.528324\C,0  
,9.872934,8.81983,2.335144\C,0,8.84661,6.92516,3.175441\H,0,6.932061,7  
.186752,4.099238\F,0,2.993164,12.484691,6.996585\C,0,4.785675,13.00275  
1,8.369367\F,0,6.583515,13.493352,9.717381\F,0,8.044508,21.677965,3.18  
2518\C,0,8.655381,21.05007,5.328373\F,0,9.333188,20.389221,7.479536\H,  
0,2.196081,10.991838,1.218343\C,0,3.08036,9.191442,0.521869\H,0,4.1226  
35,7.410269,0.069701\H,0,5.970052,9.869496,8.5744\C,0,4.615062,8.52144  
2,7.645826\H,0,3.39258,7.21714,6.51452\H,0,10.721494,9.288464,1.852193  
\C,0,9.885691,7.50546,2.568658\H,0,8.866489,5.858103,3.359776\F,0,4.17  
6307,12.363872,9.3848\F,0,8.888641,22.336981,5.632649\H,0,2.325875,9.0  
27969,-0.237583\H,0,4.214398,8.173079,8.58979\H,0,10.739655,6.910698,2  
.268804\F,0,13.551515,13.493353,-0.872141\C,0,14.168281,13.553762,0.32  
5505\C,0,13.561418,14.194471,1.355091\C,0,15.349354,13.002752,0.475874  
\F,0,12.369127,14.750975,1.144574\C,0,14.130631,14.296986,2.618191\F,0  
,15.958722,12.363873,-0.53956\C,0,15.973631,13.068654,1.678827\C,0,13.  
411676,14.965155,3.715001\C,0,15.345659,13.744144,2.747332\F,0,17.1418  
65,12.484692,1.848655\C,0,12.975584,14.254882,4.85073\C,0,13.068943,16  
.29417,3.536327\F,0,16.014229,13.828352,3.932594\C,0,12.215691,14.9706  
46,5.775942\Au,0,13.381626,12.270512,5.047979\C,0,12.296859,16.975153,  
4.449156\H,0,13.417624,16.813328,2.652157\C,0,11.876875,16.303324,5.59  
1961\C,0,11.733135,14.258543,7.010737\P,0,13.862213,10.051458,5.158898  
\C,0,11.950196,18.414005,4.16434\H,0,11.28349,16.818819,6.336907\C,0,1  
0.602463,13.509827,6.978895\C,0,12.399964,14.296986,8.194231\C,0,14.53  
0473,9.409284,3.607089\C,0,12.43856,9.008382,5.55658\C,0,15.102015,9.6  
52753,6.423414\C,0,12.153259,19.402529,5.064785\C,0,11.487753,18.76364  
9,2.933082\F,0,9.89276,13.381685,5.867933\C,0,10.174964,12.803216,8.07  
9243\C,0,11.996193,13.626987,9.314038\F,0,13.534451,15.023733,8.287991  
\C,0,14.070971,9.931005,2.418289\C,0,15.509532,8.459202,3.552249\C,0,1  
2.387924,7.664722,5.275301\C,0,11.365956,9.592343,6.138597\C,0,16.1408  
44,10.527781,6.575552\C,0,15.057363,8.548902,7.2301\F,0,12.588712,19.1  
35262,6.287197\C,0,11.936433,20.733376,4.751663\F,0,11.206218,17.86482  
4,1.983103\C,0,11.229893,20.096327,2.589886\F,0,9.049078,12.043516,8.0  
24402\C,0,10.858116,12.892915,9.246815\F,0,12.671507,13.700209,10.4550  
74\H,0,13.318563,10.709742,2.435448\C,0,14.552656,9.473354,1.201184\C,  
0,15.990349,7.996061,2.352834\H,0,15.912643,8.061779,4.475515\C,0,11.2  
88421,6.925159,5.669799\H,0,13.20297,7.186752,4.746002\C,0,10.262095,8  
.81983,6.510097\H,0,11.361402,10.660499,6.316917\H,0,16.196634,11.4099  
46,5.949663\C,0,17.116516,10.295294,7.520224\C,0,16.046095,8.307262,8.  
169464\H,0,14.233245,7.852907,7.132625\F,0,12.090521,21.677965,5.66272  
3\C,0,11.479648,21.05007,3.516868\F,0,10.801841,20.389223,1.365705\F,0  
,10.42202,12.219254,10.345393\H,0,14.164978,9.869496,0.270841\C,0,15.5  
19968,8.521442,1.199415\H,0,16.742451,7.21714,2.330721\C,0,10.249338,7  
.505459,6.276582\H,0,11.26854,5.858103,5.485464\H,0,9.413536,9.288464,  
6.993047\H,0,17.93895,10.991837,7.626897\C,0,17.05467,9.191442,8.32337  
1\H,0,16.012396,7.410268,8.77554\F,0,11.246388,22.336981,3.212591\H,0,  
15.920633,8.173079,0.255451\H,0,9.395375,6.910698,6.576437\H,0,17.8091  
55,9.027969,9.082824\\Version=ES64L-G09RevE.01\HF=-3585.1433604\RMSD=6  
.089e-09\Dipole=-0.0000009,-5.9933166,-0.0000011\Quadrupole=114.408200  
3,-182.936905,68.5287047,-114.0219086,3.2035441,-50.0894252\PG=C01 [X(  
C84H34Au2F30P2)]\@

1\1\GINC-COMPUTE040\SP\RB3LYP\Gen\C84H34Au2F30P2\CRAT\17-Sep-2020\0\#\#  
p b3lyp/gen pseudo=read counterpoise=2 empiricaldispersion=gd3bj nosym

m gfpint\\CrystalExplorer Job symop = x, -y, z+1/2, r = 13.3743\\0,1\  
F,0,7.463523,13.70021,-1.609834\C,0,8.138836,13.626987,-0.468798\C,0,9  
.276914,12.892916,-0.401574\C,0,7.735065,14.296986,0.65101\F,0,9.71301  
,12.219255,-1.500153\C,0,9.960066,12.803216,0.765998\F,0,6.600577,15.0  
23734,0.55725\C,0,8.401895,14.258544,1.834503\F,0,11.085952,12.043517,  
0.820838\C,0,9.532567,13.509828,1.866346\C,0,7.919339,14.970646,3.0692  
99\F,0,10.242269,13.381686,2.977308\C,0,7.159447,14.254882,3.99451\C,0  
,8.258155,16.303324,3.253279\Au,0,6.753403,12.270512,3.797262\C,0,6.72  
3353,14.965155,5.130239\H,0,8.85154,16.818821,2.508333\C,0,7.83817,16.  
975153,4.396085\P,0,6.272816,10.051458,3.686342\C,0,7.066087,16.29417,  
5.308913\C,0,6.004399,14.296986,6.227049\C,0,8.184832,18.414005,4.6809  
02\C,0,5.033016,9.652754,2.421827\C,0,5.604558,9.409284,5.238152\C,0,7  
.69647,9.008382,3.288661\H,0,6.717406,16.813328,6.193084\C,0,4.789371,  
13.744144,6.097909\C,0,6.573611,14.194471,7.49015\C,0,7.98177,19.40252  
9,3.780456\C,0,8.647276,18.763649,5.912158\C,0,3.994187,10.527781,2.26  
9689\C,0,5.077668,8.548902,1.615141\C,0,6.064059,9.931005,6.426952\C,0  
,4.625498,8.459202,5.292992\C,0,8.769074,9.592343,2.706644\C,0,7.74710  
5,7.664722,3.569939\F,0,4.1208,13.828352,4.912647\C,0,4.161398,13.0686  
53,7.166414\F,0,7.765901,14.750975,7.700666\C,0,5.966749,13.553762,8.5  
19735\F,0,7.546317,19.135262,2.558044\C,0,8.198596,20.733376,4.093577\  
F,0,8.928812,17.864824,6.862138\C,0,8.905136,20.096327,6.255354\H,0,3.  
938395,11.409946,2.895578\C,0,3.018513,10.295294,1.325017\C,0,4.088934  
,8.307262,0.675776\H,0,5.901785,7.852908,1.712615\H,0,6.816466,10.7097  
42,6.409792\C,0,5.582373,9.473354,7.644057\C,0,4.144681,7.99606,6.4924  
07\H,0,4.222387,8.061779,4.369726\H,0,8.773628,10.660499,2.528324\C,0,  
9.872934,8.81983,2.335144\C,0,8.84661,6.92516,3.175441\H,0,6.932061,7.  
186752,4.099238\F,0,2.993164,12.484691,6.996585\C,0,4.785675,13.002751  
,8.369367\F,0,6.583515,13.493352,9.717381\F,0,8.044508,21.677965,3.182  
518\C,0,8.655381,21.05007,5.328373\F,0,9.333188,20.389221,7.479536\H,0  
,2.196081,10.991838,1.218343\C,0,3.08036,9.191442,0.521869\H,0,4.12263  
5,7.410269,0.069701\H,0,5.970052,9.869496,8.5744\C,0,4.615062,8.521442  
,7.645826\H,0,3.39258,7.21714,6.51452\H,0,10.721494,9.288464,1.852193\  
C,0,9.885691,7.50546,2.568658\H,0,8.866489,5.858103,3.359776\F,0,4.176  
307,12.363872,9.3848\F,0,8.888641,22.336981,5.632649\H,0,2.325875,9.02  
7969,-0.237583\H,0,4.214398,8.173079,8.58979\H,0,10.739655,6.910698,2.  
268804\F,0,11.60861,14.275019,-3.212591\C,0,11.375351,15.561931,-3.516  
868\C,0,10.918566,15.878624,-4.751663\C,0,11.625105,16.515673,-2.58988  
6\F,0,10.764478,14.934035,-5.662723\C,0,10.701738,17.209471,-5.064785\  
F,0,12.053157,16.222776,-1.365705\C,0,11.367245,17.848351,-2.933081\F,  
0,10.266286,17.476738,-6.287198\C,0,10.9048,18.197994,-4.16434\F,0,11.  
648781,18.747175,-1.983103\C,0,10.558139,19.636847,-4.449156\C,0,9.786  
056,20.317829,-3.536327\C,0,10.978124,20.308676,-5.591961\C,0,9.443322  
,21.646845,-3.715001\H,0,9.437374,19.798672,-2.652157\C,0,10.639308,21  
.641354,-5.775942\H,0,11.571508,19.79318,-6.336908\C,0,8.724367,22.315  
014,-2.618191\C,0,9.879416,22.357119,-4.85073\C,0,11.121863,22.353456,  
-7.010738\C,0,9.29358,22.417528,-1.355091\C,0,7.509339,22.867855,-2.74  
7332\Au,0,9.473371,24.341488,-5.047979\C,0,10.455034,22.315014,-8.1942  
3\C,0,12.252536,23.102173,-6.978895\C,0,8.686717,23.058237,-0.325505\F  
,0,10.485869,21.861025,-1.144574\C,0,6.881366,23.543346,-1.678827\F,0,  
6.840769,22.783648,-3.932594\P,0,8.992785,26.560541,-5.158898\F,0,9.32  
0546,21.588266,-8.287991\C,0,10.858805,22.985014,-9.314038\F,0,12.9622  
37,23.230314,-5.867933\C,0,12.680034,23.808784,-8.079244\F,0,9.303484,  
23.118647,0.872141\C,0,7.505643,23.609247,-0.475874\F,0,5.713133,24.12

7308,-1.848655\C,0,7.752984,26.959246,-6.423414\C,0,8.324525,27.202717  
,-3.607089\C,0,10.416438,27.603617,-5.556581\F,0,10.183491,22.911789,-  
10.455074\C,0,11.996881,23.719084,-9.246815\F,0,13.80592,24.568483,-8.  
024402\F,0,6.896276,24.248127,0.53956\C,0,6.714155,26.084219,-6.575552  
\C,0,7.797636,28.063097,-7.2301\C,0,8.784027,26.680994,-2.418288\C,0,7  
.345467,28.152796,-3.552249\C,0,11.489042,27.019657,-6.138597\C,0,10.4  
67072,28.947279,-5.275301\F,0,12.432979,24.392746,-10.345393\H,0,6.658  
363,25.202053,-5.949662\C,0,5.738481,26.316706,-7.520224\C,0,6.808902,  
28.304737,-8.169464\H,0,8.621753,28.759092,-7.132626\H,0,9.536434,25.9  
02258,-2.435448\C,0,8.302341,27.138645,-1.201184\C,0,6.864649,28.61593  
8,-2.352834\H,0,6.942355,28.55022,-4.475515\H,0,11.493596,25.951502,-6  
.316917\C,0,12.592902,27.79217,-6.510097\C,0,11.566578,29.68684,-5.669  
799\H,0,9.652029,29.425247,-4.746003\H,0,4.916049,25.620163,-7.626897\  
C,0,5.800328,27.420557,-8.323371\H,0,6.842603,29.201731,-8.77554\H,0,8  
.69002,26.742502,-0.270841\C,0,7.335031,28.090557,-1.199414\H,0,6.1125  
47,29.394859,-2.330721\H,0,13.441462,27.323536,-6.993047\C,0,12.605659  
,29.106539,-6.276582\H,0,11.586457,30.753897,-5.485464\H,0,5.045843,27  
.58403,-9.082824\H,0,6.934366,28.438919,-0.255451\H,0,13.459622,29.701  
302,-6.576437\\Version=ES64L-G09RevE.01\HF=-3585.1434314\RMSE=6.089e-0  
9\Dipole=-1.7103568,-0.0043402,-0.490234\Quadrupole=-75.1001676,124.11  
02225,-49.0100548,-43.9157376,-7.2160947,-68.0571344\PG=C01 [X(C84H34A  
u2F30P2)]\@

1\1\GINC-COMPUTE035\SP\RB3LYP\Gen\C84H34Au2F30P2\CRAT\17-Sep-2020\0\#\#  
p b3lyp/gen pseudo=read counterpoise=2 empiricaldispersion=gd3bj nosym  
m gfpint\CrystalExplorer Job symop = -x+1/2, -y+1/2, -z, r = 12.4998  
\0,1\F,0,7.463523,13.70021,-1.609834\C,0,8.138836,13.626987,-0.468798  
\C,0,9.276914,12.892916,-0.401574\C,0,7.735065,14.296986,0.65101\F,0,9  
.71301,12.219255,-1.500153\C,0,9.960066,12.803216,0.765998\F,0,6.60057  
7,15.023734,0.55725\C,0,8.401895,14.258544,1.834503\F,0,11.085952,12.0  
43517,0.820838\C,0,9.532567,13.509828,1.866346\C,0,7.919339,14.970646,  
3.069299\F,0,10.242269,13.381686,2.977308\C,0,7.159447,14.254882,3.994  
51\C,0,8.258155,16.303324,3.253279\Au,0,6.753403,12.270512,3.797262\C,  
0,6.723353,14.965155,5.130239\H,0,8.85154,16.818821,2.508333\C,0,7.838  
17,16.975153,4.396085\P,0,6.272816,10.051458,3.686342\C,0,7.066087,16.  
29417,5.308913\C,0,6.004399,14.296986,6.227049\C,0,8.184832,18.414005,  
4.680902\C,0,5.033016,9.652754,2.421827\C,0,5.604558,9.409284,5.238152  
\C,0,7.69647,9.008382,3.288661\H,0,6.717406,16.813328,6.193084\C,0,4.7  
89371,13.744144,6.097909\C,0,6.573611,14.194471,7.49015\C,0,7.98177,19  
.402529,3.780456\C,0,8.647276,18.763649,5.912158\C,0,3.994187,10.52778  
1,2.269689\C,0,5.077668,8.548902,1.615141\C,0,6.064059,9.931005,6.4269  
52\C,0,4.625498,8.459202,5.292992\C,0,8.769074,9.592343,2.706644\C,0,7  
.747105,7.664722,3.569939\F,0,4.1208,13.828352,4.912647\C,0,4.161398,1  
3.068653,7.166414\F,0,7.765901,14.750975,7.700666\C,0,5.966749,13.5537  
62,8.519735\F,0,7.546317,19.135262,2.558044\C,0,8.198596,20.733376,4.0  
93577\F,0,8.928812,17.864824,6.862138\C,0,8.905136,20.096327,6.255354\  
H,0,3.938395,11.409946,2.895578\C,0,3.018513,10.295294,1.325017\C,0,4.  
088934,8.307262,0.675776\H,0,5.901785,7.852908,1.712615\H,0,6.816466,1  
0.709742,6.409792\C,0,5.582373,9.473354,7.644057\C,0,4.144681,7.99606,  
6.492407\H,0,4.222387,8.061779,4.369726\H,0,8.773628,10.660499,2.52832  
4\C,0,9.872934,8.81983,2.335144\C,0,8.84661,6.92516,3.175441\H,0,6.932  
061,7.186752,4.099238\F,0,2.993164,12.484691,6.996585\C,0,4.785675,13.  
002751,8.369367\F,0,6.583515,13.493352,9.717381\F,0,8.044508,21.677965

,3.182518\C,0,8.655381,21.05007,5.328373\F,0,9.333188,20.389221,7.4795  
36\H,0,2.196081,10.991838,1.218343\C,0,3.08036,9.191442,0.521869\H,0,4  
.122635,7.410269,0.069701\H,0,5.970052,9.869496,8.5744\C,0,4.615062,8.  
521442,7.645826\H,0,3.39258,7.21714,6.51452\H,0,10.721494,9.288464,1.8  
52193\C,0,9.885691,7.50546,2.568658\H,0,8.866489,5.858103,3.359776\F,0  
,4.176307,12.363872,9.3848\F,0,8.888641,22.336981,5.632649\H,0,2.32587  
5,9.027969,-0.237583\H,0,4.214398,8.173079,8.58979\H,0,10.739655,6.910  
698,2.268804\F,0,2.994396,14.974307,10.693895\C,0,1.826163,14.390346,1  
0.524068\C,0,1.201886,14.456247,9.321115\C,0,1.19819,13.714854,11.5925  
73\F,0,1.811254,15.095126,8.305681\C,0,0.020812,13.905236,9.170746\F,0  
,1.86676,13.630647,12.777835\C,0,-0.016838,13.162013,11.463432\F,0,-0.  
595955,13.965647,7.9731\C,0,-0.586051,13.264527,10.200332\C,0,-0.73579  
2,12.493844,12.560242\F,0,-1.77834,12.708024,9.989815\C,0,-1.171885,13  
.204117,13.695971\C,0,-1.078526,11.164828,12.381567\Au,0,-0.765842,15.  
188487,13.89322\C,0,-1.931778,12.488353,14.621182\C,0,-1.850609,10.483  
846,13.294396\H,0,-0.729845,10.64567,11.497397\P,0,-0.285255,17.407539  
,14.004139\C,0,-2.270594,11.155675,14.437201\C,0,-2.414333,13.200455,1  
5.855979\C,0,-2.197271,9.044993,13.009581\C,0,0.954545,17.806246,15.26  
8654\C,0,0.383004,18.049715,12.45233\C,0,-1.708909,18.450617,14.401821  
\H,0,-2.863979,10.640179,15.182148\C,0,-1.747504,13.162012,17.039471\C  
,0,-3.545006,13.949171,15.824136\C,0,-1.994209,8.05647,13.910026\C,0,-  
2.659715,8.695349,11.778322\C,0,1.993374,16.931219,15.420793\C,0,0.909  
893,18.910097,16.07534\C,0,-0.076498,17.527994,11.263529\C,0,1.362063,  
18.999796,12.39749\C,0,-2.781513,17.866655,14.983838\C,0,-1.759544,19.  
794277,14.120543\F,0,-0.613017,12.435265,17.133232\C,0,-2.151276,13.83  
2012,18.159279\F,0,-4.254708,14.077312,14.713174\C,0,-3.972505,14.6557  
83,16.924484\F,0,-1.558756,8.323737,15.132438\C,0,-2.211035,6.725623,1  
3.596904\F,0,-2.941251,9.594174,10.828343\C,0,-2.917575,7.362673,11.43  
5126\H,0,2.049166,16.049051,14.794903\C,0,2.969049,17.163704,16.365465  
\C,0,1.898627,19.151735,17.014704\H,0,0.085776,19.606091,15.977866\H,0  
,0.828905,16.749258,11.280689\C,0,0.405188,17.985645,10.046424\C,0,1.  
84288,19.462938,11.198075\H,0,1.765174,19.397219,13.320756\H,0,-2.7860  
67,16.7985,15.162157\C,0,-3.885374,18.639168,15.355337\C,0,-2.859049,2  
0.533838,14.51504\H,0,-0.9445,20.272247,13.591244\F,0,-1.475962,13.758  
789,19.300316\C,0,-3.289352,14.566083,18.092054\F,0,-5.098391,15.41548  
2,16.869642\F,0,-2.056947,5.781034,14.507964\C,0,-2.667821,6.40893,12.  
362109\F,0,-3.345627,7.069777,10.210946\H,0,3.791479,16.467161,16.4721  
37\C,0,2.907201,18.267557,17.168612\H,0,1.864926,20.048731,17.620781\H  
,0,0.017509,17.589502,9.116081\C,0,1.372499,18.937555,10.044655\H,0,2.  
594981,20.241859,11.175961\H,0,-4.733932,18.170534,15.838287\C,0,-3.89  
813,19.953539,15.121823\H,0,-2.878929,21.600895,14.330705\F,0,-3.72544  
9,15.239743,19.190634\F,0,-2.90108,5.122018,12.057832\H,0,3.661686,18.  
431028,17.928064\H,0,1.773163,19.285919,9.100691\H,0,-4.752094,20.5483  
02,15.421677\\Version=ES64L-G09RevE.01\HF=-3585.1434271\RMSD=6.088e-09  
\Dipole=-0.0000005,-0.0000066,-0.0000077\Quadrupole=-24.0947313,38.690  
2843,-14.595553,-40.3008445,11.4331057,60.4436788\PG=C01 [X(C84H34Au2F  
30P2)]\@

1\1\GINC-COMPUTE041\SP\RB3LYP\Gen\C84H34Au2F30P2\CRAT\17-Sep-2020\0\#\#  
p b3lyp/gen pseudo=read counterpoise=2 empiricaldispersion=gd3bj nosym  
m gfpint\\CrystalExplorer Job symop = x, y, z, r = 18.306\\0,1\F,0,7.  
463523,13.70021,-1.609834\C,0,8.138836,13.626987,-0.468798\C,0,9.27691  
4,12.892916,-0.401574\C,0,7.735065,14.296986,0.65101\F,0,9.71301,12.21



9255,-1.500153\C,0,9.960066,12.803216,0.765998\F,0,6.600577,15.023734,  
0.55725\C,0,8.401895,14.258544,1.834503\F,0,11.085952,12.043517,0.8208  
38\C,0,9.532567,13.509828,1.866346\C,0,7.919339,14.970646,3.069299\F,0  
,10.242269,13.381686,2.977308\C,0,7.159447,14.254882,3.99451\C,0,8.258  
155,16.303324,3.253279\Au,0,6.753403,12.270512,3.797262\C,0,6.723353,1  
4.965155,5.130239\H,0,8.85154,16.818821,2.508333\C,0,7.83817,16.975153  
,4.396085\P,0,6.272816,10.051458,3.686342\C,0,7.066087,16.29417,5.3089  
13\C,0,6.004399,14.296986,6.227049\C,0,8.184832,18.414005,4.680902\C,0  
,5.033016,9.652754,2.421827\C,0,5.604558,9.409284,5.238152\C,0,7.69647  
,9.008382,3.288661\H,0,6.717406,16.813328,6.193084\C,0,4.789371,13.744  
144,6.097909\C,0,6.573611,14.194471,7.49015\C,0,7.98177,19.402529,3.78  
0456\C,0,8.647276,18.763649,5.912158\C,0,3.994187,10.527781,2.269689\C  
,0,5.077668,8.548902,1.615141\C,0,6.064059,9.931005,6.426952\C,0,4.625  
498,8.459202,5.292992\C,0,8.769074,9.592343,2.706644\C,0,7.747105,7.66  
4722,3.569939\F,0,4.1208,13.828352,4.912647\C,0,4.161398,13.068653,7.1  
66414\F,0,7.765901,14.750975,7.700666\C,0,5.966749,13.553762,8.519735\  
F,0,7.546317,19.135262,2.558044\C,0,8.198596,20.733376,4.093577\F,0,8.  
928812,17.864824,6.862138\C,0,8.905136,20.096327,6.255354\H,0,3.938395  
,11.409946,2.895578\C,0,3.018513,10.295294,1.325017\C,0,4.088934,8.307  
262,0.675776\H,0,5.901785,7.852908,1.712615\H,0,6.816466,10.709742,6.4  
09792\C,0,5.582373,9.473354,7.644057\C,0,4.144681,7.99606,6.492407\H,0  
,4.222387,8.061779,4.369726\H,0,8.773628,10.660499,2.528324\C,0,9.8729  
34,8.81983,2.335144\C,0,8.84661,6.92516,3.175441\H,0,6.932061,7.186752  
,4.099238\F,0,2.993164,12.484691,6.996585\C,0,4.785675,13.002751,8.369  
367\F,0,6.583515,13.493352,9.717381\F,0,8.044508,21.677965,3.182518\C,  
0,8.655381,21.05007,5.328373\F,0,9.333188,20.389221,7.479536\H,0,2.196  
081,10.991838,1.218343\C,0,3.08036,9.191442,0.521869\H,0,4.122635,7.41  
0269,0.069701\H,0,5.970052,9.869496,8.5744\C,0,4.615062,8.521442,7.645  
826\H,0,3.39258,7.21714,6.51452\H,0,10.721494,9.288464,1.852193\C,0,9.  
885691,7.50546,2.568658\H,0,8.866489,5.858103,3.359776\F,0,4.176307,12  
.363872,9.3848\F,0,8.888641,22.336981,5.632649\H,0,2.325875,9.027969,-  
0.237583\H,0,4.214398,8.173079,8.58979\H,0,10.739655,6.910698,2.268804  
\F,0,8.044509,3.371965,3.182518\C,0,8.198597,2.427375,4.093577\C,0,8.6  
55382,2.744069,5.328373\C,0,7.981771,1.096529,3.780456\F,0,8.888642,4.  
030981,5.632649\C,0,8.905137,1.790326,6.255354\F,0,7.546318,0.829262,2  
.558044\C,0,8.184833,0.108005,4.680902\F,0,9.333189,2.083222,7.479536\  
C,0,8.647277,0.45765,5.912158\C,0,7.838171,-1.330847,4.396085\F,0,8.92  
8813,-0.441175,6.862138\C,0,8.258156,-2.002676,3.253279\C,0,7.066088,-  
2.01183,5.308913\C,0,7.91934,-3.335354,3.069299\H,0,8.851541,-1.48718,  
2.508333\H,0,6.717407,-1.492671,6.193084\C,0,6.723354,-3.340845,5.1302  
39\C,0,7.159448,-4.051118,3.99451\C,0,8.401896,-4.047456,1.834503\C,0,  
6.0044,-4.009014,6.227049\Au,0,6.753403,-6.035488,3.797262\C,0,7.73506  
6,-4.009014,0.65101\C,0,9.532568,-4.796173,1.866346\C,0,4.789371,-4.56  
1855,6.097909\C,0,6.573612,-4.111528,7.49015\P,0,6.272817,-8.254541,3.  
686342\F,0,6.600578,-3.282266,0.55725\C,0,8.138837,-4.679013,-0.468798  
\F,0,10.24227,-4.924314,2.977308\C,0,9.960066,-5.502783,0.765998\F,0,4  
.120801,-4.477648,4.912647\C,0,4.161399,-5.237347,7.166414\F,0,7.76590  
2,-3.555025,7.700666\C,0,5.96675,-4.752238,8.519735\C,0,5.033017,-8.65  
3246,2.421827\C,0,5.604558,-8.896716,5.238152\C,0,7.696471,-9.297618,3  
.288661\F,0,7.463524,-4.60579,-1.609834\C,0,9.276915,-5.413085,-0.4015  
74\F,0,11.085953,-6.262483,0.820838\F,0,2.993165,-5.821309,6.996585\C,  
0,4.785676,-5.303248,8.369367\F,0,6.583516,-4.812648,9.717381\C,0,3.99  
4188,-7.778219,2.269689\C,0,5.077669,-9.757098,1.615141\C,0,6.06406,-8

.374995,6.426952\C,0,4.625499,-9.846798,5.292992\C,0,8.769075,-8.71365  
6,2.706644\C,0,7.747106,-10.641277,3.569939\F,0,9.713011,-6.086744,-1.  
500153\F,0,4.176308,-5.942128,9.3848\H,0,3.938396,-6.896053,2.895578\C  
,0,3.018513,-8.010706,1.325017\C,0,4.088934,-9.998737,0.675776\H,0,5.9  
01786,-10.453093,1.712615\H,0,6.816467,-7.596259,6.409792\C,0,5.582374  
, -8.832645,7.644057\C,0,4.144682,-10.309939,6.492407\H,0,4.222388,-10.  
244221,4.369726\H,0,8.773628,-7.645501,2.528324\C,0,9.872935,-9.48617,  
2.335144\C,0,8.846611,-11.38084,3.175441\H,0,6.932062,-11.119247,4.099  
238\H,0,2.196082,-7.314163,1.218343\C,0,3.080361,-9.114557,0.521869\H,  
0,4.122635,-10.895731,0.069701\H,0,5.970053,-8.436503,8.5744\C,0,4.615  
063,-9.784557,7.645826\H,0,3.39258,-11.08886,6.51452\H,0,10.721495,-9.  
017536,1.852193\C,0,9.885692,-10.80054,2.568658\H,0,8.86649,-12.447897  
,3.359776\H,0,2.325876,-9.27803,-0.237583\H,0,4.214398,-10.13292,8.589  
79\H,0,10.739655,-11.395302,2.268804\\Version=ES64L-G09RevE.01\HF=-358  
5.1434351\RMSD=6.089e-09\Dipole=-1.7254405,-6.7133474,-0.4759427\Quadr  
upole=7.1795124,-25.6903702,18.5108578,-95.1447815,-20.8467712,-53.295  
1767\PG=C01 [X(C84H34Au2F30P2)]\@\

1\1\GINC-COMPUTE008\SP\RB3LYP\Gen\C84H34Au2F30P2\CRAT\17-Sep-2020\0\#\#  
p b3lyp/gen pseudo=read counterpoise=2 empiricaldispersion=gd3bj nosym  
m gfpint\CystalExplorer Job symop = -x, -y, -z, r = 13.9451\0,1\F,  
0,7.463523,13.70021,-1.609834\C,0,8.138836,13.626987,-0.468798\C,0,9.2  
76914,12.892916,-0.401574\C,0,7.735065,14.296986,0.65101\F,0,9.71301,1  
2.219255,-1.500153\C,0,9.960066,12.803216,0.765998\F,0,6.600577,15.023  
734,0.55725\C,0,8.401895,14.258544,1.834503\F,0,11.085952,12.043517,0.  
820838\C,0,9.532567,13.509828,1.866346\C,0,7.919339,14.970646,3.069299  
\F,0,10.242269,13.381686,2.977308\C,0,7.159447,14.254882,3.99451\C,0,8  
.258155,16.303324,3.253279\Au,0,6.753403,12.270512,3.797262\C,0,6.7233  
53,14.965155,5.130239\H,0,8.85154,16.818821,2.508333\C,0,7.83817,16.97  
5153,4.396085\P,0,6.272816,10.051458,3.686342\C,0,7.066087,16.29417,5.  
308913\C,0,6.004399,14.296986,6.227049\C,0,8.184832,18.414005,4.680902  
\C,0,5.033016,9.652754,2.421827\C,0,5.604558,9.409284,5.238152\C,0,7.6  
9647,9.008382,3.288661\H,0,6.717406,16.813328,6.193084\C,0,4.789371,13  
.744144,6.097909\C,0,6.573611,14.194471,7.49015\C,0,7.98177,19.402529,  
3.780456\C,0,8.647276,18.763649,5.912158\C,0,3.994187,10.527781,2.2696  
89\C,0,5.077668,8.548902,1.615141\C,0,6.064059,9.931005,6.426952\C,0,4  
.625498,8.459202,5.292992\C,0,8.769074,9.592343,2.706644\C,0,7.747105,  
7.664722,3.569939\F,0,4.1208,13.828352,4.912647\C,0,4.161398,13.068653  
,7.166414\F,0,7.765901,14.750975,7.700666\C,0,5.966749,13.553762,8.519  
735\F,0,7.546317,19.135262,2.558044\C,0,8.198596,20.733376,4.093577\F,  
0,8.928812,17.864824,6.862138\C,0,8.905136,20.096327,6.255354\H,0,3.93  
8395,11.409946,2.895578\C,0,3.018513,10.295294,1.325017\C,0,4.088934,8  
.307262,0.675776\H,0,5.901785,7.852908,1.712615\H,0,6.816466,10.709742  
,6.409792\C,0,5.582373,9.473354,7.644057\C,0,4.144681,7.99606,6.492407  
\H,0,4.222387,8.061779,4.369726\H,0,8.773628,10.660499,2.528324\C,0,9.  
872934,8.81983,2.335144\C,0,8.84661,6.92516,3.175441\H,0,6.932061,7.18  
6752,4.099238\F,0,2.993164,12.484691,6.996585\C,0,4.785675,13.002751,8  
.369367\F,0,6.583515,13.493352,9.717381\F,0,8.044508,21.677965,3.18251  
8\C,0,8.655381,21.05007,5.328373\F,0,9.333188,20.389221,7.479536\H,0,2  
.196081,10.991838,1.218343\C,0,3.08036,9.191442,0.521869\H,0,4.122635,  
7.410269,0.069701\H,0,5.970052,9.869496,8.5744\C,0,4.615062,8.521442,7  
.645826\H,0,3.39258,7.21714,6.51452\H,0,10.721494,9.288464,1.852193\C,  
0,9.885691,7.50546,2.568658\H,0,8.866489,5.858103,3.359776\F,0,4.17630

7,12.363872,9.3848\F,0,8.888641,22.336981,5.632649\H,0,2.325875,9.0279  
69,-0.237583\H,0,4.214398,8.173079,8.58979\H,0,10.739655,6.910698,2.26  
8804\F,0,8.52642,14.275018,12.057832\C,0,8.759679,15.56193,12.362109\C  
,0,8.509925,16.515673,11.435126\C,0,9.216464,15.878623,13.596904\F,0,8  
.081872,16.222776,10.210946\C,0,8.767784,17.848349,11.778322\F,0,9.370  
552,14.934034,14.507964\C,0,9.43329,17.209471,13.910026\F,0,8.486249,1  
8.747173,10.828343\C,0,9.230227,18.197992,13.009581\F,0,9.868743,17.47  
6736,15.132438\C,0,9.57689,19.636845,13.294396\C,0,10.348974,20.317829  
,12.381567\C,0,9.156905,20.308676,14.437201\C,0,10.691707,21.646845,12  
.560242\H,0,10.697655,19.79867,11.497397\C,0,9.495722,21.641352,14.621  
182\H,0,8.56352,19.793179,15.182148\C,0,11.410662,22.315014,11.463432\  
C,0,10.255614,22.357117,13.695971\C,0,9.013165,22.353455,15.855979\C,0  
,10.841448,22.417526,10.200332\C,0,12.62569,22.867855,11.592573\Au,0,1  
0.661657,24.341486,13.89322\C,0,9.679996,22.315012,17.039471\C,0,7.882  
493,23.102171,15.824136\F,0,9.649158,21.861025,9.989815\C,0,11.448312,  
23.058237,9.170746\C,0,13.253662,23.543346,10.524068\F,0,13.29426,22.7  
83646,12.777835\P,0,11.142243,26.560539,14.004139\F,0,10.814483,21.588  
264,17.133232\C,0,9.276224,22.985012,18.159279\F,0,7.172791,23.230312,  
14.713174\C,0,7.454995,23.808783,16.924484\F,0,10.831545,23.118647,7.9  
731\C,0,12.629385,23.609247,9.321115\F,0,14.421896,24.127306,10.693895  
\C,0,12.382045,26.959246,15.268654\C,0,11.810503,27.202715,12.45233\C,  
0,9.718591,27.603617,14.401821\F,0,9.951537,22.911789,19.300316\C,0,8.  
138147,23.719084,18.092054\F,0,6.329109,24.568481,16.869642\F,0,13.238  
752,24.248127,8.305681\C,0,13.420874,26.084219,15.420793\C,0,12.337393  
,28.063097,16.07534\C,0,11.351001,26.680994,11.263529\C,0,12.789562,28  
.152796,12.39749\C,0,8.645987,27.019655,14.983838\C,0,9.667954,28.9472  
77,14.120543\F,0,7.70205,24.392744,19.190634\H,0,13.476665,25.202051,1  
4.794903\C,0,14.396547,26.316704,16.365465\C,0,13.326126,28.304735,17.  
014704\H,0,11.513274,28.75909,15.977866\H,0,10.598595,25.902256,11.280  
689\C,0,11.832687,27.138643,10.046424\C,0,13.270379,28.615938,11.19807  
5\H,0,13.192674,28.55022,13.320756\H,0,8.641432,25.9515,15.162157\C,0,  
7.542126,27.792168,15.355337\C,0,8.568451,29.686838,14.51504\H,0,10.48  
3,29.425247,13.591244\H,0,15.21898,25.620161,16.472137\C,0,14.334701,2  
7.420557,17.168612\H,0,13.292425,29.201731,17.620781\H,0,11.445008,26.  
742502,9.116081\C,0,12.799998,28.090555,10.044655\H,0,14.022481,29.394  
859,11.175961\H,0,6.693567,27.323534,15.838287\C,0,7.529369,29.106539,  
15.121823\H,0,8.548571,30.753895,14.330705\H,0,15.089186,27.584028,17.  
928064\H,0,13.200664,28.438919,9.100691\H,0,6.675406,29.7013,15.421677  
\\Version=ES64L-G09RevE.01\HF=-3585.1434307\RMSD=6.089e-09\Dipole=-0.0  
000058,-0.0000057,-0.0000078\Quadrupole=-33.2673391,99.3217299,-66.054  
3908,43.2727559,15.2979372,61.0756072\PG=C01 [X(C84H34Au2F30P2)]\@

1\1\GINC-COMPUTE021\SP\RB3LYP\Gen\C84H34Au2F30P2\CRAT\17-Sep-2020\0\#\#  
p b3lyp/gen pseudo=read counterpoise=2 empiricaldispersion=gd3bj nosym  
m gfpriint\CystalExplorer Job symop = -x, y, -z+1/2, r = 19.287\0,1\  
F,0,7.463523,13.70021,-1.609834\C,0,8.138836,13.626987,-0.468798\C,0,9  
.276914,12.892916,-0.401574\C,0,7.735065,14.296986,0.65101\F,0,9.71301  
,12.219255,-1.500153\C,0,9.960066,12.803216,0.765998\F,0,6.600577,15.0  
23734,0.55725\C,0,8.401895,14.258544,1.834503\F,0,11.085952,12.043517,  
0.820838\C,0,9.532567,13.509828,1.866346\C,0,7.919339,14.970646,3.0692  
99\F,0,10.242269,13.381686,2.977308\C,0,7.159447,14.254882,3.99451\C,0  
,8.258155,16.303324,3.253279\Au,0,6.753403,12.270512,3.797262\C,0,6.72  
3353,14.965155,5.130239\H,0,8.85154,16.818821,2.508333\C,0,7.83817,16.

975153,4.396085\P,0,6.272816,10.051458,3.686342\C,0,7.066087,16.29417,  
5.308913\C,0,6.004399,14.296986,6.227049\C,0,8.184832,18.414005,4.6809  
02\C,0,5.033016,9.652754,2.421827\C,0,5.604558,9.409284,5.238152\C,0,7  
.69647,9.008382,3.288661\H,0,6.717406,16.813328,6.193084\C,0,4.789371,  
13.744144,6.097909\C,0,6.573611,14.194471,7.49015\C,0,7.98177,19.40252  
9,3.780456\C,0,8.647276,18.763649,5.912158\C,0,3.994187,10.527781,2.26  
9689\C,0,5.077668,8.548902,1.615141\C,0,6.064059,9.931005,6.426952\C,0  
,4.625498,8.459202,5.292992\C,0,8.769074,9.592343,2.706644\C,0,7.74710  
5,7.664722,3.569939\F,0,4.1208,13.828352,4.912647\C,0,4.161398,13.0686  
53,7.166414\F,0,7.765901,14.750975,7.700666\C,0,5.966749,13.553762,8.5  
19735\F,0,7.546317,19.135262,2.558044\C,0,8.198596,20.733376,4.093577\  
F,0,8.928812,17.864824,6.862138\C,0,8.905136,20.096327,6.255354\H,0,3.  
938395,11.409946,2.895578\C,0,3.018513,10.295294,1.325017\C,0,4.088934  
,8.307262,0.675776\H,0,5.901785,7.852908,1.712615\H,0,6.816466,10.7097  
42,6.409792\C,0,5.582373,9.473354,7.644057\C,0,4.144681,7.99606,6.4924  
07\H,0,4.222387,8.061779,4.369726\H,0,8.773628,10.660499,2.528324\C,0,  
9.872934,8.81983,2.335144\C,0,8.84661,6.92516,3.175441\H,0,6.932061,7.  
186752,4.099238\F,0,2.993164,12.484691,6.996585\C,0,4.785675,13.002751  
,8.369367\F,0,6.583515,13.493352,9.717381\F,0,8.044508,21.677965,3.182  
518\C,0,8.655381,21.05007,5.328373\F,0,9.333188,20.389221,7.479536\H,0  
,2.196081,10.991838,1.218343\C,0,3.08036,9.191442,0.521869\H,0,4.12263  
5,7.410269,0.069701\H,0,5.970052,9.869496,8.5744\C,0,4.615062,8.521442  
,7.645826\H,0,3.39258,7.21714,6.51452\H,0,10.721494,9.288464,1.852193\  
C,0,9.885691,7.50546,2.568658\H,0,8.866489,5.858103,3.359776\F,0,4.176  
307,12.363872,9.3848\F,0,8.888641,22.336981,5.632649\H,0,2.325875,9.02  
7969,-0.237583\H,0,4.214398,8.173079,8.58979\H,0,10.739655,6.910698,2.  
268804\F,0,11.246388,4.030981,3.212591\C,0,11.479649,2.744069,3.516868  
\C,0,11.936434,2.427375,4.751663\C,0,11.229894,1.790327,2.589886\F,0,1  
2.090521,3.371965,5.662723\C,0,12.15326,1.096529,5.064785\F,0,10.80184  
2,2.083223,1.365705\C,0,11.487754,0.45765,2.933082\F,0,12.588713,0.829  
261,6.287197\C,0,11.950197,0.108005,4.16434\F,0,11.206218,-0.441175,1.  
983103\C,0,12.29686,-1.330847,4.449156\C,0,11.876875,-2.002676,5.59196  
1\C,0,13.068944,-2.01183,3.536327\C,0,12.215692,-3.335354,5.775942\H,0  
,11.28349,-1.48718,6.336907\H,0,13.417624,-1.492671,2.652157\C,0,13.41  
1676,-3.340845,3.715001\C,0,12.975584,-4.051118,4.85073\C,0,11.733136,  
-4.047456,7.010737\C,0,14.130632,-4.009014,2.618191\Au,0,13.381627,-6.  
035488,5.047979\C,0,12.399965,-4.009014,8.194231\C,0,10.602464,-4.7961  
73,6.978895\C,0,15.34566,-4.561855,2.747332\C,0,13.561419,-4.111528,1.  
355091\P,0,13.862214,-8.254541,5.158898\F,0,13.534452,-3.282266,8.2879  
91\C,0,11.996194,-4.679014,9.314038\F,0,9.892761,-4.924314,5.867933\C,  
0,10.174965,-5.502784,8.079243\F,0,16.014231,-4.477648,3.932594\C,0,15  
.973632,-5.237346,1.678827\F,0,12.369128,-3.555025,1.144574\C,0,14.168  
282,-4.752237,0.325505\C,0,15.102015,-8.653247,6.423414\C,0,14.530474,  
-8.896716,3.607089\C,0,12.438561,-9.297618,5.55658\F,0,12.671508,-4.60  
5791,10.455074\C,0,10.858117,-5.413085,9.246815\F,0,9.049079,-6.262484  
,8.024402\F,0,17.141867,-5.821308,1.848655\C,0,15.349355,-5.303247,0.4  
75874\F,0,13.551515,-4.812647,-0.872141\C,0,16.140844,-7.77822,6.57555  
2\C,0,15.057364,-9.757098,7.2301\C,0,14.070971,-8.374994,2.418289\C,0,  
15.509533,-9.846798,3.552249\C,0,11.365957,-8.713656,6.138597\C,0,12.3  
87925,-10.641278,5.275301\F,0,10.422021,-6.086745,10.345393\F,0,15.958  
723,-5.942127,-0.53956\H,0,16.196636,-6.896053,5.949663\C,0,17.116518,  
-8.010706,7.520224\C,0,16.046097,-9.998737,8.169464\H,0,14.233245,-10.  
453093,7.132625\H,0,13.318564,-7.596258,2.435448\C,0,14.552657,-8.8326

45,1.201184\C,0,15.99035,-10.309939,2.352834\H,0,15.912643,-10.244221,  
4.475515\H,0,11.361402,-7.645501,6.316917\C,0,10.262096,-9.48617,6.510  
097\C,0,11.288422,-11.38084,5.669799\H,0,13.202971,-11.119247,4.746002  
\H,0,17.93895,-7.314163,7.626897\C,0,17.05467,-9.114558,8.323371\H,0,1  
6.012396,-10.895732,8.77554\H,0,14.164979,-8.436503,0.270841\C,0,15.51  
9969,-9.784557,1.199415\H,0,16.742451,-11.08886,2.330721\H,0,9.413537,  
-9.017536,6.993047\C,0,10.249339,-10.80054,6.276582\H,0,11.268541,-12.  
447897,5.485464\H,0,17.809156,-9.27803,9.082824\H,0,15.920633,-10.1329  
2,0.255451\H,0,9.395376,-11.395302,6.576437\\Version=ES64L-G09RevE.01\  
HF=-3585.143436\RMSD=6.089e-09\Dipole=0.1319422,-6.6031059,0.0142111\Q  
uadrupole=51.3967442,-51.1918634,-0.2048808,-155.3440261,4.1712874,-64  
.0768584\PG=C01 [X(C84H34Au2F30P2)]\@

### Compound 3a

1\1\GINC-COMPUTE035\SP\RB3LYP\Gen\C74H40Au2Cl4F20P2\CRAT\18-Sep-2020\0  
\#p b3lyp/gen pseudo=read counterpoise=2 empiricaldispersion=gd3bj no  
symm gfprint\CrystalExplorer Job symop = y, -x+y, -z, r = 10.4624\0,  
1\Au,0,6.040917,8.340476,12.833357\Cl,0,5.871086,10.393337,13.990787\C  
l,0,3.732833,8.167566,12.804891\P,0,8.341955,8.522474,13.075194\C,0,6.  
057256,6.61786,11.750736\C,0,9.44938,7.440873,12.075381\C,0,8.831812,8  
.173018,14.78546\C,0,8.870785,10.177328,12.649391\C,0,6.408011,6.63343  
7,10.36982\C,0,5.697508,5.387233,12.305926\C,0,9.233531,6.070049,12.06  
1267\C,0,10.536118,8.004261,11.421387\C,0,8.02088,8.450817,15.844086\C  
,0,10.102921,7.700499,15.004243\C,0,8.415104,10.795238,11.503724\C,0,9  
.771653,10.880914,13.446889\C,0,6.397518,5.436563,9.628781\C,0,6.78874  
3,7.890026,9.598199\C,0,5.737979,4.216321,11.522544\C,0,5.22384,5.2729  
98,13.722131\H,0,8.37883,5.624531,12.555291\C,0,10.176371,5.283383,11.  
374336\C,0,11.442983,7.181248,10.788565\H,0,10.670874,9.078852,11.4068  
01\H,0,7.027976,8.845448,15.666708\C,0,8.451078,8.230135,17.1756\C,0,1  
0.534619,7.482413,16.323996\H,0,10.765008,7.496693,14.171695\H,0,7.664  
58,10.296497,10.902895\C,0,8.876781,12.010286,11.103799\C,0,10.228833,  
12.124522,13.039907\H,0,10.112064,10.459542,14.384594\H,0,6.692961,5.4  
58111,8.587095\C,0,6.031775,4.252669,10.186324\C,0,7.998396,7.939355,8  
.904212\C,0,5.941837,8.957088,9.386474\H,0,5.532174,3.261678,11.990691  
\C,0,5.9943,5.433966,14.818396\C,0,3.943736,4.893945,13.980906\H,0,10.  
064399,4.206715,11.336931\C,0,11.225636,5.880523,10.757981\H,0,12.3258  
66,7.599764,10.321122\H,0,7.785995,8.445884,18.002504\C,0,9.67722,7.75  
7616,17.413202\H,0,11.530972,7.101023,16.509844\H,0,8.528875,12.437891  
,10.171503\C,0,9.788142,12.700891,11.873067\H,0,10.951027,12.650524,13  
.652027\C,0,6.004794,2.985696,9.367654\F,0,8.855796,6.942392,8.948909\  
C,0,8.371634,9.047957,8.174936\F,0,4.696209,8.902567,9.925197\C,0,6.27  
91,10.029343,8.657199\F,0,7.317873,5.711766,14.667836\C,0,5.520632,5.2  
93768,16.121681\F,0,3.074346,4.675859,12.952864\C,0,3.414607,4.725188,  
15.246552\H,0,11.925345,5.257421,10.214789\H,0,10.011636,7.588081,18.4  
29247\H,0,10.14669,13.675527,11.56583\H,0,4.978013,2.7053,9.168398\H,0  
,6.494051,2.19176,9.918139\H,0,6.525379,3.147962,8.43183\F,0,9.548311,  
9.092093,7.560934\C,0,7.512737,10.089056,8.029082\F,0,5.378232,11.0340  
95,8.520754\F,0,6.352549,5.488487,17.170897\C,0,4.233034,4.964043,16.3  
21642\F,0,2.159986,4.322768,15.425342\F,0,7.817023,11.166503,7.316274\  
F,0,3.72489,4.800479,17.559059\F,0,5.586586,-0.324533,10.572134\C,0,6.  
210149,-0.968405,9.544091\C,0,5.799437,-0.594543,8.278447\C,0,7.178472  
, -1.887481,9.802867\F,0,4.823621,0.29078,8.099657\C,0,6.415506,-1.1838

94,7.203354\C,0,7.514236,-2.240571,11.219071\C,0,7.703104,-2.474235,8.706601\F,0,6.019783,-0.82561,5.96594\C,0,7.344854,-2.134124,7.403317\C,0,8.759864,-1.936809,11.774261\C,0,6.520432,-2.861076,12.002455\F,0,8.605473,-3.481583,8.857162\F,0,7.929445,-2.757226,6.354102\Au,0,10.243525,-1.061352,10.691641\C,0,8.948731,-2.232783,13.155178\C,0,6.698807,-3.097337,13.338673\H,0,5.590934,-3.160426,11.534307\Cl,0,8.939737,0.851052,10.720106\Cl,0,11.936438,0.112158,9.534211\P,0,11.551659,-2.96311,10.449804\C,0,7.90696,-2.822132,13.896215\C,0,10.227336,-1.934214,13.926799\C,0,5.588085,-3.707456,14.157344\C,0,11.168675,-4.462967,11.449616\C,0,11.493948,-3.562066,8.739536\C,0,13.249219,-2.593662,10.875607\H,0,8.073344,-3.067219,14.937903\C,0,10.874882,-2.957139,14.620787\C,0,10.727984,-0.667239,14.138524\H,0,4.831715,-2.958177,14.356601\H,0,5.145296,-4.528393,13.606859\H,0,5.988904,-4.077164,15.093167\C,0,9.873584,-4.961449,11.463732\C,0,12.199954,-5.122417,12.103612\C,0,11.329064,-2.720878,7.680912\C,0,11.720291,-4.899139,8.520754\C,0,13.556503,-1.890076,12.021274\C,0,14.308976,-3.022045,10.078109\F,0,10.440187,-4.19815,14.576089\C,0,12.021579,-2.726072,15.35006\F,0,10.057954,0.384245,13.599802\C,0,11.825216,-0.423192,14.867799\H,0,9.060403,-4.444015,10.969707\C,0,9.663731,-6.171305,12.150661\C,0,11.940636,-6.319292,12.736434\H,0,13.198105,-4.702084,12.118197\H,0,11.174373,-1.663682,7.85829\C,0,11.353047,-3.203782,6.349397\C,0,11.747272,-5.382043,7.201002\H,0,11.874831,-5.574425,9.353304\H,0,12.749319,-1.489474,12.622102\C,0,14.839604,-1.682377,12.421199\C,0,15.614562,-2.79617,10.485091\H,0,14.114263,-3.527535,9.140403\F,0,12.64814,-3.723035,15.964064\C,0,12.493748,-1.461694,15.495915\F,0,12.244923,0.85936,15.004243\H,0,8.675173,-6.612409,12.188066\C,0,10.705502,-6.781426,12.767016\H,0,12.744372,-6.874372,13.203876\H,0,11.20735,-2.519929,5.522493\C,0,11.556904,-4.501911,6.111794\H,0,11.915154,-6.435604,7.015154\H,0,15.035968,-1.167279,13.353495\C,0,15.893367,-2.126336,11.651931\H,0,16.43119,-3.158607,9.872971\F,0,13.578987,-1.186491,16.208723\H,0,10.515734,-7.698944,13.310208\H,0,11.577291,-4.876292,5.09575\H,0,16.9167,-1.94953,11.959168\\Version=ES64L-G09RevE.01\HF=-3817.6975402\RMSD=7.630e-09\Dipole=5.3535129,-6.9993293,-0.2185094\Quadrupole=114.7937959,-67.7321766,-47.0616193,-5.05833615,125.1586527,-157.9566413\PG=C01 [X(C74H40Au2Cl4F20P2)]\@\

1\1\GINC-COMPUTE035\SP\RB3LYP\Gen\C74H40Au2Cl4F20P2\CRAT\17-Sep-2020\0  
\\#p b3lyp/gen pseudo=read scf=maxcycle=2024 counterpoise=2 empiricald  
ispersion=gd3bj nosymm gffprint\\CrystalExplorer Job symop = -x, -y, -z  
, r = 10.7472\\0,1\Au,0,6.040917,8.340476,12.833357\Cl,0,5.871086,10.393337,13.990787\Cl,0,3.732833,8.167566,12.804891\P,0,8.341955,8.522474,13.075194\C,0,6.057256,6.61786,11.750736\C,0,9.44938,7.440873,12.075381\C,0,8.831812,8.173018,14.78546\C,0,8.870785,10.177328,12.649391\C,0,6.408011,6.633437,10.36982\C,0,5.697508,5.387233,12.305926\C,0,9.233531,6.070049,12.061267\C,0,10.536118,8.004261,11.421387\C,0,8.02088,8.450817,15.844086\C,0,10.102921,7.700499,15.004243\C,0,8.415104,10.795238,11.503724\C,0,9.771653,10.880914,13.446889\C,0,6.397518,5.436563,9.628781\C,0,6.788743,7.890026,9.598199\C,0,5.737979,4.216321,11.522544\C,0,5.22384,5.272998,13.722131\H,0,8.37883,5.624531,12.555291\C,0,10.176371,5.283383,11.374336\C,0,11.442983,7.181248,10.788565\H,0,10.670874,9.078852,11.406801\H,0,7.027976,8.845448,15.666708\C,0,8.451078,8.230135,17.1756\C,0,10.534619,7.482413,16.323996\H,0,10.765008,7.496693,14.171695\H,0,7.66458,10.296497,10.902895\C,0,8.876781,12.010286,11.103799\C,0,10.228833,12.124522,13.039907\H,0,10.112064,10.459542,14.384594

\H,0,6.692961,5.458111,8.587095\C,0,6.031775,4.252669,10.186324\C,0,7.998396,7.939355,8.904212\C,0,5.941837,8.957088,9.386474\H,0,5.532174,3.261678,11.990691\C,0,5.9943,5.433966,14.818396\C,0,3.943736,4.893945,13.980906\H,0,10.064399,4.206715,11.336931\C,0,11.225636,5.880523,10.757981\H,0,12.325866,7.599764,10.321122\H,0,7.785995,8.445884,18.002504\C,0,9.67722,7.757616,17.413202\H,0,11.530972,7.101023,16.509844\H,0,8.528875,12.437891,10.171503\C,0,9.788142,12.700891,11.873067\H,0,10.951027,12.650524,13.652027\C,0,6.004794,2.985696,9.367654\F,0,8.855796,6.942392,8.948909\C,0,8.371634,9.047957,8.174936\F,0,4.696209,8.902567,9.925197\C,0,6.2791,10.029343,8.657199\F,0,7.317873,5.711766,14.667836\C,0,5.520632,5.293768,16.121681\F,0,3.074346,4.675859,12.952864\C,0,3.414607,4.725188,15.246552\H,0,11.925345,5.257421,10.214789\H,0,10.011636,7.588081,18.429247\H,0,10.14669,13.675527,11.56583\H,0,4.978013,2.7053,9.168398\H,0,6.494051,2.19176,9.918139\H,0,6.525379,3.147962,8.43183\F,0,9.548311,9.092093,7.560934\C,0,7.512737,10.089056,8.029082\F,0,5.378232,11.034095,8.520754\F,0,6.352549,5.488487,17.170897\C,0,4.233034,4.964043,16.321642\F,0,2.159986,4.322768,15.425342\F,0,7.817023,11.166503,7.316274\F,0,3.72489,4.800479,17.559059\Cl,0,9.11841,15.569237,9.534211\Au,0,8.948581,17.622097,10.691641\Cl,0,11.256663,17.79501,10.720106\P,0,6.647541,17.4401,10.449804\C,0,8.93224,19.344715,11.774261\C,0,6.118712,15.785245,10.875607\C,0,5.540116,18.521702,11.449616\C,0,6.157685,17.789557,8.739536\C,0,8.581488,19.329136,13.155178\C,0,9.291989,20.57534,11.219071\C,0,6.574392,15.167336,12.021274\C,0,5.217844,15.08166,10.078109\C,0,5.755966,19.892525,11.463732\C,0,4.453379,17.958313,12.103612\C,0,6.968617,17.511757,7.680912\C,0,4.886575,18.262075,8.520754\C,0,8.200753,18.072548,13.926799\C,0,8.59198,20.526012,13.896215\C,0,9.251517,21.746252,12.002455\C,0,9.765658,20.689575,9.802867\H,0,7.324917,15.666077,12.622102\C,0,6.112717,13.952288,12.421199\C,0,4.760664,13.838052,10.485091\H,0,4.877431,15.503033,9.140403\H,0,6.610668,20.338043,10.969707\C,0,4.813126,20.679192,12.150661\C,0,3.546514,18.781326,12.736434\H,0,4.318624,16.88372,12.118197\H,0,7.961522,17.117126,7.85829\C,0,6.538418,17.732439,6.349397\C,0,4.454877,18.48016,7.201002\H,0,4.224489,18.465881,9.353304\C,0,9.047661,17.005486,14.138524\C,0,6.9911,18.023218,14.620787\H,0,8.296536,20.504463,14.937903\C,0,8.957723,21.709906,13.338673\H,0,9.457324,22.700895,11.534307\C,0,8.995196,20.528608,8.706601\C,0,11.045761,21.06863,9.544091\H,0,6.460623,13.524683,13.353495\C,0,5.201355,13.261683,11.651931\H,0,4.038469,13.312051,9.872971\H,0,4.925098,21.755859,12.188066\C,0,3.763861,20.082052,12.767016\H,0,2.663633,18.362808,13.203876\H,0,7.203502,17.516689,5.522493\C,0,5.312278,18.204958,6.111794\H,0,3.458526,18.861551,7.015154\C,0,8.710398,15.933231,14.867799\F,0,10.293286,17.060009,13.599802\C,0,6.617863,16.914618,15.35006\F,0,6.133702,19.020182,14.576089\C,0,8.984705,22.976879,14.157344\F,0,7.671625,20.250809,8.857162\C,0,9.468866,20.668806,7.403317\F,0,11.915152,21.286715,10.572134\C,0,11.574889,21.237387,8.278447\H,0,4.842806,12.287047,11.959168\H,0,3.064151,20.705154,13.310208\H,0,4.977861,18.374493,5.09575\F,0,9.611266,14.92848,15.004243\C,0,7.476761,15.873518,15.495915\F,0,5.441186,16.870481,15.964064\H,0,10.011484,23.257275,14.356601\H,0,8.495447,23.770813,13.606859\H,0,8.464119,22.814613,15.093167\F,0,8.636948,20.474087,6.354102\C,0,10.756463,20.998529,7.203354\F,0,12.82951,21.639807,8.099657\F,0,7.172475,14.79607,16.208723\F,0,11.264606,21.162096,5.96594\\Version=ES64L-G09Rev E.01\HF=-3817.697619\RMSD=7.631e-09\Dipole=0.0000049,-0.0000018,-0.0000086\Quadrupole=-46.248369,56.3002673,-10.0518983,-66.3091207,27.91946

03,20.9216025\PG=C01 [X(C74H40Au2Cl4F20P2)]\ \@

```
1\1\GINC-COMPUTE021\SP\RB3LYP\Gen\C74H40Au2Cl4F20P2\CRAT\17-Sep-2020\0
\#p b3lyp/gen pseudo=read scf=maxcycle=2024 counterpoise=2 empiricald
ispersion=gd3bj nosymm gfprint\CrystalExplorer Job symop = -x+y+1/3,
-x+2/3, z+2/3, r = 8.73495\0,1\Au,0,6.040917,8.340476,12.833357\Cl,0,
5.871086,10.393337,13.990787\Cl,0,3.732833,8.167566,12.804891\P,0,8.34
1955,8.522474,13.075194\C,0,6.057256,6.61786,11.750736\C,0,9.44938,7.4
40873,12.075381\C,0,8.831812,8.173018,14.78546\C,0,8.870785,10.177328,
12.649391\C,0,6.408011,6.633437,10.36982\C,0,5.697508,5.387233,12.3059
26\C,0,9.233531,6.070049,12.061267\C,0,10.536118,8.004261,11.421387\C,
0,8.02088,8.450817,15.844086\C,0,10.102921,7.700499,15.004243\C,0,8.41
5104,10.795238,11.503724\C,0,9.771653,10.880914,13.446889\C,0,6.397518
,5.436563,9.628781\C,0,6.788743,7.890026,9.598199\C,0,5.737979,4.21632
1,11.522544\C,0,5.22384,5.272998,13.722131\H,0,8.37883,5.624531,12.555
291\C,0,10.176371,5.283383,11.374336\C,0,11.442983,7.181248,10.788565\
H,0,10.670874,9.078852,11.406801\H,0,7.027976,8.845448,15.666708\C,0,8
.451078,8.230135,17.1756\C,0,10.534619,7.482413,16.323996\H,0,10.76500
8,7.496693,14.171695\H,0,7.66458,10.296497,10.902895\C,0,8.876781,12.0
10286,11.103799\C,0,10.228833,12.124522,13.039907\H,0,10.112064,10.459
542,14.384594\H,0,6.692961,5.458111,8.587095\C,0,6.031775,4.252669,10.
186324\C,0,7.998396,7.939355,8.904212\C,0,5.941837,8.957088,9.386474\H
,0,5.532174,3.261678,11.990691\C,0,5.9943,5.433966,14.818396\C,0,3.943
736,4.893945,13.980906\H,0,10.064399,4.206715,11.336931\C,0,11.225636,
5.880523,10.757981\H,0,12.325866,7.599764,10.321122\H,0,7.785995,8.445
884,18.002504\C,0,9.67722,7.757616,17.413202\H,0,11.530972,7.101023,16
.509844\H,0,8.528875,12.437891,10.171503\C,0,9.788142,12.700891,11.873
067\H,0,10.951027,12.650524,13.652027\C,0,6.004794,2.985696,9.367654\F
,0,8.855796,6.942392,8.948909\C,0,8.371634,9.047957,8.174936\F,0,4.696
209,8.902567,9.925197\C,0,6.2791,10.029343,8.657199\F,0,7.317873,5.711
766,14.667836\C,0,5.520632,5.293768,16.121681\F,0,3.074346,4.675859,12
.952864\C,0,3.414607,4.725188,15.246552\H,0,11.925345,5.257421,10.2147
89\H,0,10.011636,7.588081,18.429247\H,0,10.14669,13.675527,11.56583\H,
0,4.978013,2.7053,9.168398\H,0,6.494051,2.19176,9.918139\H,0,6.525379,
3.147962,8.43183\F,0,9.548311,9.092093,7.560934\C,0,7.512737,10.089056
,8.029082\F,0,5.378232,11.034095,8.520754\F,0,6.352549,5.488487,17.170
897\C,0,4.233034,4.964043,16.321642\F,0,2.159986,4.322768,15.425342\F,
0,7.817023,11.166503,7.316274\F,0,3.72489,4.800479,17.559059\Cl,0,6.06
5201,7.02729,6.149199\Au,0,4.202456,7.906643,4.991769\Cl,0,5.206751,9.
991957,4.963304\P,0,3.209551,5.822886,5.233606\C,0,2.702456,8.753801,3
.909149\C,0,2.661984,5.573386,6.943874\C,0,4.378283,4.537479,4.807804\
C,0,1.719145,5.404629,4.233794\C,0,2.540569,8.442251,2.528231\C,0,1.81
6577,9.680665,4.464339\C,0,3.308032,6.136774,8.002499\C,0,1.617216,4.7
08832,7.162656\C,0,4.537171,3.405511,5.605301\C,0,5.141248,4.623156,3.
662137\C,0,0.639901,6.276972,4.219679\C,0,1.663684,4.181792,3.579799\C
,0,1.509292,9.049775,1.787194\C,0,3.438441,7.484231,1.756612\C,0,1.954
48,10.147992,5.880544\C,0,0.782301,10.231072,3.680956\H,0,4.146245,6.7
99338,7.824884\C,0,2.901816,5.874551,9.334013\C,0,1.2125,4.444014,8.48
2409\H,0,1.109672,4.237351,6.330107\C,0,5.385577,2.387778,5.198319\H,0
,4.002046,3.321392,6.543007\C,0,5.962673,3.615808,3.262211\H,0,5.08473
8,5.52224,3.061073\H,0,0.681572,7.239664,4.713704\C,0,-0.512792,5.8537
82,3.532749\C,0,0.497501,3.807931,2.946976\H,0,2.527079,3.527535,3.565
213\H,0,1.380232,8.783139,0.745507\C,0,0.666882,9.958465,2.344737\C,0,
```



2.876335,6.411977,1.062624\C,0,4.785997,7.684143,1.544887\C,0,1.708652  
,9.40027,6.976809\C,0,2.266262,11.44612,6.139318\H,0,0.058608,10.88636  
8,4.149104\H,0,3.421502,6.342656,10.160917\C,0,1.879533,5.048942,9.571  
616\H,0,0.38403,3.771842,8.668256\H,0,5.48031,1.499338,5.810204\C,0,6.  
105073,2.481243,4.031479\H,0,6.506942,3.703301,2.329916\H,0,-1.388928,  
6.489086,3.495344\C,0,-0.520286,4.646522,2.916394\H,0,0.418806,2.83407  
4,2.479535\C,0,-0.416859,10.615318,1.526067\F,0,1.58424,6.167929,1.107  
322\C,0,3.649793,5.534442,0.333349\F,0,5.361593,8.790149,2.083609\C,0,  
5.545965,6.855937,0.815612\C,0,1.824072,9.880577,8.280093\F,0,1.287447  
,8.115122,6.826249\C,0,2.384678,11.988738,7.404964\F,0,2.512089,12.308  
079,5.111276\H,0,1.565503,4.844097,10.587661\H,0,6.770008,1.683154,3.7  
24242\H,0,-1.409613,4.351847,2.373202\H,0,-0.145999,11.644734,1.326575  
\H,0,-1.348906,10.588317,2.076316\H,0,-0.536325,10.083345,0.590242\F,0  
,3.099679,4.493343,-0.280653\C,0,4.98086,5.75772,0.187494\F,0,6.86654,  
7.133737,0.679167\F,0,1.576744,9.062756,9.329309\C,0,2.18232,11.160532  
,8.480056\F,0,2.663482,13.276482,7.583753\F,0,5.761813,4.955477,-0.525  
313\F,0,2.294741,11.68238,9.717471\\Version=ES64L-G09RevE.01\HF=-3817.  
6976093\RMSD=7.633e-09\Dipole=0.8272906,-4.0265986,-1.5607625\Quadrupo  
le=90.8838903,-74.5751281,-16.3087622,-21.0078897,62.8039512,-81.53824  
51\PG=C01 [X(C74H40Au2Cl4F20P2)]\@

1\1\GINC-COMPUTE041\SP\RB3LYP\Gen\C74H40Au2Cl4F20P2\CRAT\17-Sep-2020\0  
\#p b3lyp/gen pseudo=read scf=maxcycle=2024 counterpoise=2 empiricall  
ispersion=gd3bj nosymm gfpriint\CrystalExplorer Job symop = -y+2/3, x-  
y+1/3, z+1/3, r = 8.73482\0,1\Au,0,6.040917,8.340476,12.833357\Cl,0,5  
.871086,10.393337,13.990787\Cl,0,3.732833,8.167566,12.804891\P,0,8.341  
955,8.522474,13.075194\C,0,6.057256,6.61786,11.750736\C,0,9.44938,7.44  
0873,12.075381\C,0,8.831812,8.173018,14.78546\C,0,8.870785,10.177328,1  
2.649391\C,0,6.408011,6.633437,10.36982\C,0,5.697508,5.387233,12.30592  
6\C,0,9.233531,6.070049,12.061267\C,0,10.536118,8.004261,11.421387\C,0  
,8.02088,8.450817,15.844086\C,0,10.102921,7.700499,15.004243\C,0,8.415  
104,10.795238,11.503724\C,0,9.771653,10.880914,13.446889\C,0,6.397518,  
5.436563,9.628781\C,0,6.788743,7.890026,9.598199\C,0,5.737979,4.216321  
,11.522544\C,0,5.22384,5.272998,13.722131\H,0,8.37883,5.624531,12.5552  
91\C,0,10.176371,5.283383,11.374336\C,0,11.442983,7.181248,10.788565\H  
,0,10.670874,9.078852,11.406801\H,0,7.027976,8.845448,15.666708\C,0,8.  
451078,8.230135,17.1756\C,0,10.534619,7.482413,16.323996\H,0,10.765008  
,7.496693,14.171695\H,0,7.66458,10.296497,10.902895\C,0,8.876781,12.01  
0286,11.103799\C,0,10.228833,12.124522,13.039907\H,0,10.112064,10.4595  
42,14.384594\H,0,6.692961,5.458111,8.587095\C,0,6.031775,4.252669,10.1  
86324\C,0,7.998396,7.939355,8.904212\C,0,5.941837,8.957088,9.386474\H,  
0,5.532174,3.261678,11.990691\C,0,5.9943,5.433966,14.818396\C,0,3.9437  
36,4.893945,13.980906\H,0,10.064399,4.206715,11.336931\C,0,11.225636,5  
.880523,10.757981\H,0,12.325866,7.599764,10.321122\H,0,7.785995,8.4458  
84,18.002504\C,0,9.67722,7.757616,17.413202\H,0,11.530972,7.101023,16.  
509844\H,0,8.528875,12.437891,10.171503\C,0,9.788142,12.700891,11.8730  
67\H,0,10.951027,12.650524,13.652027\C,0,6.004794,2.985696,9.367654\F,  
0,8.855796,6.942392,8.948909\C,0,8.371634,9.047957,8.174936\F,0,4.6962  
09,8.902567,9.925197\C,0,6.2791,10.029343,8.657199\F,0,7.317873,5.7117  
66,14.667836\C,0,5.520632,5.293768,16.121681\F,0,3.074346,4.675859,12.  
952864\C,0,3.414607,4.725188,15.246552\H,0,11.925345,5.257421,10.21478  
9\H,0,10.011636,7.588081,18.429247\H,0,10.14669,13.675527,11.56583\H,0  
,4.978013,2.7053,9.168398\H,0,6.494051,2.19176,9.918139\H,0,6.525379,3

.147962,8.43183\F,0,9.548311,9.092093,7.560934\C,0,7.512737,10.089056,  
8.029082\F,0,5.378232,11.034095,8.520754\F,0,6.352549,5.488487,17.1708  
97\C,0,4.233034,4.964043,16.321642\F,0,2.159986,4.322768,15.425342\F,0  
,7.817023,11.166503,7.316274\F,0,3.72489,4.800479,17.559059\Cl,0,6.049  
91,7.803051,20.646479\Au,0,4.746124,9.715454,20.674944\C,0,6.229784,10  
.590912,19.592323\Cl,0,3.05321,8.541945,21.832375\P,0,3.43799,11.61721  
2,20.91678\C,0,6.040917,10.886886,18.211407\C,0,7.475412,10.894674,20.  
147514\C,0,3.820971,13.117071,19.916967\C,0,3.495699,12.216169,22.6270  
48\C,0,1.740429,11.247766,20.490978\C,0,7.082687,11.476236,17.470369\C  
,0,4.762312,10.588316,17.439787\C,0,8.469216,11.51518,19.364132\C,0,7.  
811177,10.541583,21.563719\C,0,5.116065,13.615552,19.902853\C,0,2.7896  
94,13.77652,19.262974\C,0,3.660584,11.374981,23.685673\C,0,3.269358,13  
.553242,22.845831\C,0,1.433144,10.544179,19.345312\C,0,0.680671,11.676  
147,21.288477\H,0,6.916304,11.721323,16.428682\C,0,8.290841,11.75144,1  
8.027912\C,0,4.114766,11.611242,16.7458\C,0,4.261663,9.321342,17.22806  
2\H,0,9.398715,11.814528,19.832279\C,0,8.779499,9.622508,21.822495\C,0  
,7.286544,11.128337,22.659985\H,0,5.929095,13.098377,20.396879\C,0,5.3  
25917,14.825409,19.215923\C,0,3.049012,14.973395,18.630152\H,0,1.79154  
3,13.356186,19.248625\H,0,3.815126,10.318045,23.508295\C,0,3.6366,11.8  
57885,25.017189\C,0,3.242377,14.036145,24.165583\H,0,3.114666,14.22878  
7,22.013517\H,0,2.240029,10.143578,18.744484\C,0,0.150043,10.336479,18  
.945385\C,0,-0.624914,11.450274,20.881493\H,0,0.875385,12.181639,22.22  
6418\C,0,9.401563,12.36156,17.209242\C,0,2.96807,11.380175,16.016523\F  
,0,4.549462,12.852252,16.790497\F,0,4.931694,8.269857,17.766785\C,0,3.  
164432,9.077294,16.498787\F,0,9.403062,8.978636,20.794453\C,0,9.190211  
,9.248647,23.088139\F,0,6.384176,12.135685,22.509424\C,0,7.644793,10.7  
88227,23.963268\H,0,6.314026,15.266771,19.178755\C,0,4.284147,15.43552  
9,18.599569\H,0,2.244975,15.528476,18.162708\H,0,3.781998,11.174031,25  
.844328\C,0,3.432743,13.156014,25.254791\H,0,3.074344,15.089966,24.351  
665\H,0,-0.046319,9.821382,18.013327\C,0,-0.903719,10.780439,19.714653  
\H,0,-1.441842,11.812711,21.493614\H,0,10.157483,11.612539,17.009985\H  
,0,9.000743,12.731267,16.273653\H,0,9.844353,13.182496,17.759727\C,0,2  
.4959,10.115797,15.870668\F,0,2.341508,12.377137,15.402522\F,0,2.74472  
6,7.794743,16.362341\F,0,10.166027,8.363322,23.266928\C,0,8.574142,9.8  
37997,24.163231\F,0,7.060203,11.411328,25.012484\H,0,4.473764,16.35330  
6,18.056612\H,0,3.412357,13.530395,26.270836\H,0,-1.927202,10.603893,1  
9.407417\F,0,1.410661,9.840593,15.157863\F,0,8.969865,9.479713,25.4006  
46\\Version=ES64L-G09RevE.01\HF=-3817.6974778\RMSD=7.631e-09\Dipole=3.  
0728694,2.7303368,-1.5605291\Quadrupole=50.3014855,84.6284137,-134.929  
8992,66.444637,40.5366936,110.1133708\PG=C01 [X(C74H40Au2Cl4F20P2)]\@\

1\1\GINC-COMPUTE008\SP\RB3LYP\Gen\C74H40Au2Cl4F20P2\CRAT\17-Sep-2020\0  
\#p b3lyp/gen pseudo=read scf=yqc counterpoise=2 empiricaldispersion=  
gd3bj nosymm gfprint\CrystalExplorer Job symop = y+1/3, -x+y+2/3, -z+  
2/3, r = 12.2029\0,1\Au,0,6.040917,8.340476,12.833357\Cl,0,5.871086,1  
0.393337,13.990787\Cl,0,3.732833,8.167566,12.804891\P,0,8.341955,8.522  
474,13.075194\C,0,6.057256,6.61786,11.750736\C,0,9.44938,7.440873,12.0  
75381\C,0,8.831812,8.173018,14.78546\C,0,8.870785,10.177328,12.649391\  
C,0,6.408011,6.633437,10.36982\C,0,5.697508,5.387233,12.305926\C,0,9.2  
33531,6.070049,12.061267\C,0,10.536118,8.004261,11.421387\C,0,8.02088,  
8.450817,15.844086\C,0,10.102921,7.700499,15.004243\C,0,8.415104,10.79  
5238,11.503724\C,0,9.771653,10.880914,13.446889\C,0,6.397518,5.436563,  
9.628781\C,0,6.788743,7.890026,9.598199\C,0,5.737979,4.216321,11.52254

4\C,0,5.22384,5.272998,13.722131\H,0,8.37883,5.624531,12.555291\C,0,10  
.176371,5.283383,11.374336\C,0,11.442983,7.181248,10.788565\H,0,10.670  
874,9.078852,11.406801\H,0,7.027976,8.845448,15.666708\C,0,8.451078,8.  
230135,17.1756\C,0,10.534619,7.482413,16.323996\H,0,10.765008,7.496693  
,14.171695\H,0,7.66458,10.296497,10.902895\C,0,8.876781,12.010286,11.1  
03799\C,0,10.228833,12.124522,13.039907\H,0,10.112064,10.459542,14.384  
594\H,0,6.692961,5.458111,8.587095\C,0,6.031775,4.252669,10.186324\C,0  
,7.998396,7.939355,8.904212\C,0,5.941837,8.957088,9.386474\H,0,5.53217  
4,3.261678,11.990691\C,0,5.9943,5.433966,14.818396\C,0,3.943736,4.8939  
45,13.980906\H,0,10.064399,4.206715,11.336931\C,0,11.225636,5.880523,1  
0.757981\H,0,12.325866,7.599764,10.321122\H,0,7.785995,8.445884,18.002  
504\C,0,9.67722,7.757616,17.413202\H,0,11.530972,7.101023,16.509844\H,  
0,8.528875,12.437891,10.171503\C,0,9.788142,12.700891,11.873067\H,0,10  
.951027,12.650524,13.652027\C,0,6.004794,2.985696,9.367654\F,0,8.85579  
6,6.942392,8.948909\C,0,8.371634,9.047957,8.174936\F,0,4.696209,8.9025  
67,9.925197\C,0,6.2791,10.029343,8.657199\F,0,7.317873,5.711766,14.667  
836\C,0,5.520632,5.293768,16.121681\F,0,3.074346,4.675859,12.952864\C,  
0,3.414607,4.725188,15.246552\H,0,11.925345,5.257421,10.214789\H,0,10.  
011636,7.588081,18.429247\H,0,10.14669,13.675527,11.56583\H,0,4.978013  
,2.7053,9.168398\H,0,6.494051,2.19176,9.918139\H,0,6.525379,3.147962,8  
.43183\F,0,9.548311,9.092093,7.560934\C,0,7.512737,10.089056,8.029082\  
F,0,5.378232,11.034095,8.520754\F,0,6.352549,5.488487,17.170897\C,0,4.  
233034,4.964043,16.321642\F,0,2.159986,4.322768,15.425342\F,0,7.817023  
,11.166503,7.316274\F,0,3.72489,4.800479,17.559059\F,0,10.440036,13.11  
0322,6.734501\C,0,10.874731,14.351333,6.779199\C,0,10.227184,15.374258  
,6.085211\C,0,12.021427,14.582399,7.508473\C,0,8.94858,15.075688,5.313  
591\C,0,10.727834,16.641232,6.296936\F,0,12.647988,13.585437,8.122477\  
C,0,12.493598,15.846776,7.654329\C,0,7.906809,14.486338,6.054628\C,0,8  
.759713,15.371661,3.932674\F,0,10.057804,17.692715,5.758214\C,0,11.825  
066,16.885281,7.026211\F,0,13.578836,16.121981,8.367136\H,0,8.073195,1  
4.241251,7.096315\C,0,6.698657,14.211135,5.497086\C,0,7.514086,15.0679  
,3.377484\Au,0,10.243373,16.24712,2.850054\F,0,12.244771,18.167831,7.1  
62656\C,0,5.587934,13.601014,6.315756\C,0,6.520282,14.447393,4.160866\  
C,0,7.17832,15.420991,1.961279\P,0,11.551506,14.345362,2.608217\Cl,0,1  
1.936289,17.420628,1.692624\Cl,0,8.939587,18.159523,2.878519\H,0,5.145  
145,12.780077,5.765271\H,0,5.988754,13.231308,7.251345\H,0,4.832014,14  
.350035,6.515013\H,0,5.590783,14.148046,3.692719\C,0,7.702953,14.83423  
7,0.865014\C,0,6.21,16.340065,1.702504\C,0,11.168527,12.845503,3.60802  
9\C,0,11.493797,13.746406,0.897949\C,0,13.249067,14.714809,3.034019\F,  
0,8.605321,13.826889,1.015574\C,0,7.344705,15.174346,-0.438271\F,0,5.5  
86436,16.983938,2.730546\C,0,5.799287,16.713926,0.436859\C,0,9.873434,  
12.347022,3.622144\C,0,12.199802,12.186054,4.262024\C,0,11.328913,14.5  
87592,-0.160675\C,0,11.72014,12.409332,0.679167\C,0,13.556354,15.41839  
4,4.179687\C,0,14.308826,14.286427,2.236521\F,0,7.929295,14.551245,-1.  
487485\C,0,6.415354,16.124578,-0.638233\F,0,4.823471,17.599251,0.25806  
9\C,0,9.66358,11.137166,4.309074\H,0,9.060401,12.864197,3.128119\C,0,1  
1.940484,10.989179,4.894846\H,0,13.197954,12.606388,4.276374\H,0,11.17  
4372,15.644529,0.016703\C,0,11.352897,14.104689,-1.492191\C,0,11.74712  
1,11.926428,-0.640586\H,0,11.874831,11.733787,1.511481\H,0,12.749467,1  
5.818997,4.780515\C,0,14.839455,15.626095,4.579611\C,0,15.614411,14.51  
23,2.643504\H,0,14.114112,13.780934,1.29858\F,0,6.019633,16.482861,-1.  
875647\H,0,8.675472,10.695802,4.346243\C,0,10.70535,10.527045,4.925429  
\H,0,12.744522,10.434099,5.362288\H,0,11.207498,14.788543,-2.31933\C,0

,11.556754,12.806561,-1.729794\H,0,11.915154,10.872607,-0.826668\H,0,1  
5.035815,16.141193,5.511672\C,0,15.893214,15.182136,3.810344\H,0,16.43  
1339,14.149862,2.031384\H,0,10.515734,9.609268,5.468386\H,0,11.577139,  
12.432179,-2.745838\H,0,16.916698,15.358682,4.11758\\Version=ES64L-G09  
RevE.01\HF=-3817.6975283\RMSD=6.863e-09\Dipole=4.8839624,-6.1955415,0.  
2658403\Quadrupole=200.4123727,-254.0163791,53.6040065,-17.6391384,111  
.7305998,-42.8180189\PG=C01 [X(C74H40Au2Cl4F20P2)]\@\

1\1\GINC-COMPUTE040\SP\RB3LYP\Gen\C74H40Au2Cl4F20P2\CRAT\18-Sep-2020\0  
\#p b3lyp/gen pseudo=read scf=yqc counterpoise=2 empiricaldispersion=  
gd3bj nosymm gfprint\CrystalExplorer Job symop = x-y+1/3, x+2/3, -z+2  
/3, r = 12.2028\0,1\Au,0,6.040917,8.340476,12.833357\Cl,0,5.871086,10  
.393337,13.990787\Cl,0,3.732833,8.167566,12.804891\P,0,8.341955,8.5224  
74,13.075194\C,0,6.057256,6.61786,11.750736\C,0,9.44938,7.440873,12.07  
5381\C,0,8.831812,8.173018,14.78546\C,0,8.870785,10.177328,12.649391\C  
,0,6.408011,6.633437,10.36982\C,0,5.697508,5.387233,12.305926\C,0,9.23  
3531,6.070049,12.061267\C,0,10.536118,8.004261,11.421387\C,0,8.02088,8  
.450817,15.844086\C,0,10.102921,7.700499,15.004243\C,0,8.415104,10.795  
238,11.503724\C,0,9.771653,10.880914,13.446889\C,0,6.397518,5.436563,9  
.628781\C,0,6.788743,7.890026,9.598199\C,0,5.737979,4.216321,11.522544  
\C,0,5.22384,5.272998,13.722131\H,0,8.37883,5.624531,12.555291\C,0,10.  
176371,5.283383,11.374336\C,0,11.442983,7.181248,10.788565\H,0,10.6708  
74,9.078852,11.406801\H,0,7.027976,8.845448,15.666708\C,0,8.451078,8.2  
30135,17.1756\C,0,10.534619,7.482413,16.323996\H,0,10.765008,7.496693,  
14.171695\H,0,7.66458,10.296497,10.902895\C,0,8.876781,12.010286,11.10  
3799\C,0,10.228833,12.124522,13.039907\H,0,10.112064,10.459542,14.3845  
94\H,0,6.692961,5.458111,8.587095\C,0,6.031775,4.252669,10.186324\C,0,  
7.998396,7.939355,8.904212\C,0,5.941837,8.957088,9.386474\H,0,5.532174  
,3.261678,11.990691\C,0,5.9943,5.433966,14.818396\C,0,3.943736,4.89394  
5,13.980906\H,0,10.064399,4.206715,11.336931\C,0,11.225636,5.880523,10  
.757981\H,0,12.325866,7.599764,10.321122\H,0,7.785995,8.445884,18.0025  
04\C,0,9.67722,7.757616,17.413202\H,0,11.530972,7.101023,16.509844\H,0  
,8.528875,12.437891,10.171503\C,0,9.788142,12.700891,11.873067\H,0,10.  
951027,12.650524,13.652027\C,0,6.004794,2.985696,9.367654\F,0,8.855796  
,6.942392,8.948909\C,0,8.371634,9.047957,8.174936\F,0,4.696209,8.90256  
7,9.925197\C,0,6.2791,10.029343,8.657199\F,0,7.317873,5.711766,14.6678  
36\C,0,5.520632,5.293768,16.121681\F,0,3.074346,4.675859,12.952864\C,0  
,3.414607,4.725188,15.246552\H,0,11.925345,5.257421,10.214789\H,0,10.0  
11636,7.588081,18.429247\H,0,10.14669,13.675527,11.56583\H,0,4.978013,  
2.7053,9.168398\H,0,6.494051,2.19176,9.918139\H,0,6.525379,3.147962,8.  
43183\F,0,9.548311,9.092093,7.560934\C,0,7.512737,10.089056,8.029082\F  
,0,5.378232,11.034095,8.520754\F,0,6.352549,5.488487,17.170897\C,0,4.2  
33034,4.964043,16.321642\F,0,2.159986,4.322768,15.425342\F,0,7.817023,  
11.166503,7.316274\F,0,3.72489,4.800479,17.559059\F,0,11.889521,4.1610  
22,8.122477\C,0,11.339406,3.119922,7.508473\C,0,10.008338,2.896644,7.6  
54329\C,0,12.112865,2.242387,6.779199\F,0,9.227386,3.698888,8.367136\C  
,0,9.443234,1.798427,7.026211\F,0,13.404959,2.486435,6.734501\C,0,11.5  
50758,1.170133,6.085211\F,0,8.12266,1.520628,7.162656\C,0,10.203202,0.  
970221,6.296936\C,0,12.448629,0.212114,5.313591\F,0,9.627605,-0.135785  
,5.758214\C,0,12.286743,-0.099437,3.932674\C,0,13.479908,-0.39541,6.05  
4628\Au,0,10.786744,0.747722,2.850054\C,0,13.172622,-1.0263,3.377484\H  
,0,13.609117,-0.129035,7.096315\C,0,14.322318,-1.304101,5.497086\P,0,1  
1.779648,2.831478,2.608217\Cl,0,8.923999,1.627074,1.692624\Cl,0,9.7824

48,-1.337592,2.878519\C,0,14.206898,-1.576707,4.160866\C,0,13.034719,-  
1.493627,1.961279\C,0,15.406058,-1.960954,6.315756\C,0,10.610917,4.116  
886,3.034019\C,0,13.270054,3.249736,3.608029\C,0,12.327215,3.080979,0.  
897949\H,0,14.931041,-2.232263,3.692719\C,0,13.280546,-0.745904,0.8650  
14\C,0,12.722938,-2.791756,1.702504\H,0,15.135648,-2.99063,6.515013\H,  
0,16.338554,-1.934213,5.765271\H,0,15.525825,-1.428981,7.251345\C,0,9.  
847951,4.031209,4.179687\C,0,10.452028,5.248854,2.236521\C,0,14.349298  
,2.377393,3.622144\C,0,13.325515,4.472573,4.262024\C,0,11.681167,2.517  
591,-0.160675\C,0,13.371983,3.945533,0.679167\F,0,13.701752,0.539243,1  
.015574\C,0,13.165128,-1.226213,-0.438271\F,0,12.47711,-3.653714,2.730  
546\C,0,12.604521,-3.334374,0.436859\C,0,9.026526,5.038557,4.579611\H,  
0,9.904612,3.131865,4.780515\C,0,9.603622,6.266587,2.643504\H,0,10.987  
303,5.332713,1.29858\H,0,14.308077,1.414441,3.128119\C,0,15.501991,2.8  
00583,4.309074\C,0,14.491698,4.846434,4.894846\H,0,12.462569,5.12657,4  
.276374\H,0,10.843254,1.855026,0.016703\C,0,12.087383,2.779813,-1.4921  
91\C,0,13.776699,4.210351,-0.640586\H,0,13.879976,4.416753,1.511481\F,  
0,13.412455,-0.408392,-1.487485\C,0,12.80688,-2.506168,-0.638233\F,0,1  
2.325716,-4.622118,0.258069\H,0,8.482258,4.951063,5.511672\C,0,8.88412  
7,6.173121,3.810344\H,0,9.509189,7.155026,2.031384\H,0,16.378426,2.165  
279,4.346243\C,0,15.509485,4.007843,4.925429\H,0,14.570543,5.82003,5.3  
62288\H,0,11.567997,2.311708,-2.31933\C,0,13.109667,3.605423,-1.729794  
\H,0,14.605468,4.882522,-0.826668\F,0,12.694458,-3.028016,-1.875647\H,  
0,8.219642,6.970952,4.11758\H,0,16.399261,4.302258,5.468386\H,0,13.423  
846,3.810008,-2.745838\\Version=ES64L-G09RevE.01\HF=-3817.697645\RMSD  
=6.863e-09\Dipole=7.8076629,1.1327482,-0.2670345\Quadrupole=187.352590  
3,-95.3223599,-92.0302304,109.9833613,130.8848882,-37.4554971\PG=C01 [  
X(C74H40Au2Cl4F20P2)]\@

1\1\GINC-COMPUTE035\SP\RB3LYP\Gen\C74H40Au2Cl4F20P2\CRAT\17-Sep-2020\0  
\#p b3lyp/gen pseudo=read scf=maxcycle=2024 counterpoise=2 empiricald  
ispersion=gd3bj nosymm gffrint\CrystalExplorer Job symop = -x+2/3, -y  
+1/3, -z+1/3, r = 9.39732\0,1\Au,0,6.040917,8.340476,12.833357\Cl,0,5  
.871086,10.393337,13.990787\Cl,0,3.732833,8.167566,12.804891\P,0,8.341  
955,8.522474,13.075194\C,0,6.057256,6.61786,11.750736\C,0,9.44938,7.44  
0873,12.075381\C,0,8.831812,8.173018,14.78546\C,0,8.870785,10.177328,1  
2.649391\C,0,6.408011,6.633437,10.36982\C,0,5.697508,5.387233,12.30592  
6\C,0,9.233531,6.070049,12.061267\C,0,10.536118,8.004261,11.421387\C,0  
,8.02088,8.450817,15.844086\C,0,10.102921,7.700499,15.004243\C,0,8.415  
104,10.795238,11.503724\C,0,9.771653,10.880914,13.446889\C,0,6.397518,  
5.436563,9.628781\C,0,6.788743,7.890026,9.598199\C,0,5.737979,4.216321  
,11.522544\C,0,5.22384,5.272998,13.722131\H,0,8.37883,5.624531,12.5552  
91\C,0,10.176371,5.283383,11.374336\C,0,11.442983,7.181248,10.788565\H  
,0,10.670874,9.078852,11.406801\H,0,7.027976,8.845448,15.666708\C,0,8.  
451078,8.230135,17.1756\C,0,10.534619,7.482413,16.323996\H,0,10.765008  
,7.496693,14.171695\H,0,7.66458,10.296497,10.902895\C,0,8.876781,12.01  
0286,11.103799\C,0,10.228833,12.124522,13.039907\H,0,10.112064,10.4595  
42,14.384594\H,0,6.692961,5.458111,8.587095\C,0,6.031775,4.252669,10.1  
86324\C,0,7.998396,7.939355,8.904212\C,0,5.941837,8.957088,9.386474\H,  
0,5.532174,3.261678,11.990691\C,0,5.9943,5.433966,14.818396\C,0,3.9437  
36,4.893945,13.980906\H,0,10.064399,4.206715,11.336931\C,0,11.225636,5  
.880523,10.757981\H,0,12.325866,7.599764,10.321122\H,0,7.785995,8.4458  
84,18.002504\C,0,9.67722,7.757616,17.413202\H,0,11.530972,7.101023,16.  
509844\H,0,8.528875,12.437891,10.171503\C,0,9.788142,12.700891,11.8730

67\H,0,10.951027,12.650524,13.652027\C,0,6.004794,2.985696,9.367654\F,  
0,8.855796,6.942392,8.948909\C,0,8.371634,9.047957,8.174936\F,0,4.6962  
09,8.902567,9.925197\C,0,6.2791,10.029343,8.657199\F,0,7.317873,5.7117  
66,14.667836\C,0,5.520632,5.293768,16.121681\F,0,3.074346,4.675859,12.  
952864\C,0,3.414607,4.725188,15.246552\H,0,11.925345,5.257421,10.21478  
9\H,0,10.011636,7.588081,18.429247\H,0,10.14669,13.675527,11.56583\H,0  
,4.978013,2.7053,9.168398\H,0,6.494051,2.19176,9.918139\H,0,6.525379,3  
.147962,8.43183\F,0,9.548311,9.092093,7.560934\C,0,7.512737,10.089056,  
8.029082\F,0,5.378232,11.034095,8.520754\F,0,6.352549,5.488487,17.1708  
97\C,0,4.233034,4.964043,16.321642\F,0,2.159986,4.322768,15.425342\F,0  
,7.817023,11.166503,7.316274\F,0,3.72489,4.800479,17.559059\F,0,7.6717  
75,2.942338,16.69875\C,0,8.995348,3.220137,16.548189\C,0,9.469016,3.36  
0335,15.244904\C,0,9.765808,3.381105,17.644453\F,0,8.637099,3.165616,1  
4.195689\C,0,10.756615,3.69006,15.044942\C,0,11.045911,3.760159,17.385  
679\C,0,9.29214,3.266869,19.060659\F,0,11.264758,3.853624,13.807527\C,  
0,11.575041,3.928915,16.120035\F,0,11.915303,3.978244,18.413721\C,0,9.  
251668,4.437781,19.844042\C,0,8.932392,2.036243,19.615849\F,0,12.82966  
2,4.331336,15.941244\H,0,9.457174,5.392426,19.375893\C,0,8.957873,4.40  
1434,21.180262\Au,0,8.948731,0.313626,18.53323\C,0,8.581638,2.020666,2  
0.996767\C,0,8.984856,5.668407,21.998932\C,0,8.59213,3.21754,21.737804  
\P,0,6.647693,0.131629,18.291391\Cl,0,9.118562,-1.739235,17.375799\Cl,  
0,11.256814,0.486537,18.561693\C,0,8.200904,0.764077,21.768385\H,0,8.4  
95148,6.462603,21.448681\H,0,10.011636,5.948803,22.198423\H,0,8.46427,  
5.506141,22.934755\H,0,8.296687,3.195991,22.779491\C,0,5.540268,1.2132  
3,19.291203\C,0,6.157836,0.481085,16.581123\C,0,6.118863,-1.523225,18.  
717194\C,0,6.991251,0.714748,22.462374\C,0,9.047811,-0.302985,21.98011  
\C,0,5.756117,2.584054,19.305319\C,0,4.453529,0.649842,19.945198\C,0,6  
.968768,0.203286,15.522499\C,0,4.886726,0.953604,16.362341\C,0,6.57454  
4,-2.141135,19.862862\C,0,5.217995,-2.226812,17.919697\F,0,6.133852,1.  
711711,22.417675\C,0,6.618013,-0.393853,23.191648\F,0,10.293439,-0.248  
464,21.441389\C,0,8.710547,-1.375239,22.709387\H,0,6.610518,3.029572,1  
8.811293\C,0,4.813277,3.37072,19.992249\C,0,3.546664,1.472855,20.57802  
\H,0,4.318324,-0.424489,19.959784\C,0,6.538569,0.423968,14.190985\H,0,  
7.961522,-0.191085,15.700112\C,0,4.455029,1.17169,15.042589\H,0,4.2244  
9,1.15767,17.194891\H,0,7.324769,-1.642395,20.463926\C,0,6.112867,-3.3  
56184,20.262785\C,0,4.760814,-3.470418,18.326679\H,0,4.877433,-1.80517  
9,16.981991\F,0,5.441338,-0.437991,23.805651\C,0,7.476912,-1.434954,23  
.337503\F,0,9.611416,-2.379991,22.845831\H,0,4.925249,4.447388,20.0296  
54\C,0,3.764012,2.773581,20.608604\H,0,2.663783,1.054339,21.045462\H,0  
,7.203653,0.208219,13.36408\C,0,5.312428,0.896487,13.953382\H,0,3.4585  
27,1.55334,14.856742\H,0,6.460773,-3.783787,21.195082\C,0,5.201506,-4.  
046789,19.493519\H,0,4.03862,-3.996421,17.714794\F,0,7.172625,-2.5124,  
24.05031\H,0,3.064003,3.396682,21.151794\H,0,4.977862,1.066282,12.9373  
37\H,0,4.842657,-5.021423,19.800755\\Version=ES64L-G09RevE.01\HF=-3817  
.6976094\RMSD=7.631e-09\Dipole=-0.0002195,0.000187,0.0000395\Quadrupol  
e=-21.5084752,-16.921897,38.4303722,78.6785927,-37.9631318,16.9810892\  
PG=C01 [X(C74H40Au2Cl4F20P2)]\@

1\1\GINC-COMPUTE021\SP\RB3LYP\Gen\C74H40Au2Cl4F20P2\CRAT\18-Sep-2020\0  
\#p b3lyp/gen pseudo=read scf=yqc counterpoise=2 empiricaldispersion=  
gd3bj nosymm gfprint\CrystalExplorer Job symop = x-y+2/3, x+1/3, -z+1  
/3, r = 13.5731\0,1\Au,0,6.040917,8.340476,12.833357\Cl,0,5.871086,10  
.393337,13.990787\Cl,0,3.732833,8.167566,12.804891\P,0,8.341955,8.5224

74,13.075194\C,0,6.057256,6.61786,11.750736\C,0,9.44938,7.440873,12.07  
5381\C,0,8.831812,8.173018,14.78546\C,0,8.870785,10.177328,12.649391\C  
,0,6.408011,6.633437,10.36982\C,0,5.697508,5.387233,12.305926\C,0,9.23  
3531,6.070049,12.061267\C,0,10.536118,8.004261,11.421387\C,0,8.02088,8  
.450817,15.844086\C,0,10.102921,7.700499,15.004243\C,0,8.415104,10.795  
238,11.503724\C,0,9.771653,10.880914,13.446889\C,0,6.397518,5.436563,9  
.628781\C,0,6.788743,7.890026,9.598199\C,0,5.737979,4.216321,11.522544  
\C,0,5.22384,5.272998,13.722131\H,0,8.37883,5.624531,12.555291\C,0,10.  
176371,5.283383,11.374336\C,0,11.442983,7.181248,10.788565\H,0,10.6708  
74,9.078852,11.406801\H,0,7.027976,8.845448,15.666708\C,0,8.451078,8.2  
30135,17.1756\C,0,10.534619,7.482413,16.323996\H,0,10.765008,7.496693,  
14.171695\H,0,7.66458,10.296497,10.902895\C,0,8.876781,12.010286,11.10  
3799\C,0,10.228833,12.124522,13.039907\H,0,10.112064,10.459542,14.3845  
94\H,0,6.692961,5.458111,8.587095\C,0,6.031775,4.252669,10.186324\C,0,  
7.998396,7.939355,8.904212\C,0,5.941837,8.957088,9.386474\H,0,5.532174  
,3.261678,11.990691\C,0,5.9943,5.433966,14.818396\C,0,3.943736,4.89394  
5,13.980906\H,0,10.064399,4.206715,11.336931\C,0,11.225636,5.880523,10  
.757981\H,0,12.325866,7.599764,10.321122\H,0,7.785995,8.445884,18.0025  
04\C,0,9.67722,7.757616,17.413202\H,0,11.530972,7.101023,16.509844\H,0  
,8.528875,12.437891,10.171503\C,0,9.788142,12.700891,11.873067\H,0,10.  
951027,12.650524,13.652027\C,0,6.004794,2.985696,9.367654\F,0,8.855796  
,6.942392,8.948909\C,0,8.371634,9.047957,8.174936\F,0,4.696209,8.90256  
7,9.925197\C,0,6.2791,10.029343,8.657199\F,0,7.317873,5.711766,14.6678  
36\C,0,5.520632,5.293768,16.121681\F,0,3.074346,4.675859,12.952864\C,0  
,3.414607,4.725188,15.246552\H,0,11.925345,5.257421,10.214789\H,0,10.0  
11636,7.588081,18.429247\H,0,10.14669,13.675527,11.56583\H,0,4.978013,  
2.7053,9.168398\H,0,6.494051,2.19176,9.918139\H,0,6.525379,3.147962,8.  
43183\F,0,9.548311,9.092093,7.560934\C,0,7.512737,10.089056,8.029082\F  
,0,5.378232,11.034095,8.520754\F,0,6.352549,5.488487,17.170897\C,0,4.2  
33034,4.964043,16.321642\F,0,2.159986,4.322768,15.425342\F,0,7.817023,  
11.166503,7.316274\F,0,3.72489,4.800479,17.559059\F,0,12.694756,14.280  
194,13.807527\C,0,12.807178,14.802042,15.044942\C,0,12.604819,13.97383  
6,16.120035\C,0,13.165426,16.081997,15.244904\F,0,12.326015,12.686092,  
15.941244\C,0,12.723236,14.516454,17.385679\F,0,13.412753,16.899818,14  
.195689\C,0,13.280845,16.562304,16.548189\F,0,12.477408,13.654496,18.4  
13721\C,0,13.035016,15.814583,17.644453\F,0,13.702049,17.847452,16.698  
75\C,0,13.17292,16.281908,19.060659\C,0,12.287042,17.208773,19.615849\  
C,0,14.207197,15.731502,19.844042\Au,0,10.787041,18.055933,18.53323\C,  
0,12.448927,17.520325,20.996767\C,0,14.322615,16.004108,21.180262\H,0,  
14.930888,15.076207,19.375893\Cl,0,8.924296,18.935284,17.375799\Cl,0,9  
.782744,15.970618,18.561693\P,0,11.779945,20.139688,18.291391\C,0,13.4  
80205,16.9128,21.737804\C,0,11.551056,18.478342,21.768385\C,0,15.40635  
6,15.347257,21.998932\C,0,13.270351,20.557945,19.291203\C,0,12.327513,  
20.389189,16.581123\C,0,10.611214,21.425095,18.717194\H,0,13.609264,17  
.179436,22.779491\C,0,12.113161,19.550596,22.462374\C,0,10.203501,18.2  
78431,21.98011\H,0,15.135496,14.31784,22.198423\H,0,16.338404,15.37425  
7,21.448681\H,0,15.525823,15.87923,22.934755\C,0,14.349597,19.685602,1  
9.305319\C,0,13.325812,21.780783,19.945198\C,0,11.681466,19.8258,15.52  
2499\C,0,13.37228,21.253742,16.362341\C,0,9.848249,21.339418,19.862862  
\C,0,10.452326,22.557064,17.919697\F,0,13.405256,19.794645,22.417675\C  
,0,11.339704,20.428133,23.191648\F,0,9.627904,17.172424,21.441389\C,0,  
9.443532,19.106638,22.709387\H,0,14.307926,18.72291,18.811293\C,0,15.5  
02289,20.108791,19.992249\C,0,14.491996,22.154644,20.57802\H,0,12.4624

17,22.43504,19.959784\H,0,10.843253,19.163237,15.700112\C,0,12.087681,  
20.088022,14.190985\C,0,13.776997,21.51856,15.042589\H,0,13.879826,21.  
725224,17.194891\H,0,9.904758,20.440334,20.463926\C,0,9.026824,22.3467  
66,20.262785\C,0,9.603921,23.574797,18.326679\H,0,10.987451,22.641182,  
16.981991\F,0,11.889818,21.469231,23.805651\C,0,10.008636,20.204853,23  
.337503\F,0,8.122958,18.828836,22.845831\H,0,16.378426,19.473488,20.02  
9654\C,0,15.509782,21.316053,20.608604\H,0,14.570691,23.1285,21.045462  
\H,0,11.567994,19.619917,13.36408\C,0,13.109964,20.913633,13.953382\H,  
0,14.605467,22.190731,14.856742\H,0,8.482555,22.259274,21.195082\C,0,8  
.884425,23.481331,19.493519\H,0,9.509187,24.463236,17.714794\F,0,9.227  
683,21.007097,24.05031\H,0,16.399109,21.610727,21.151794\H,0,13.423994  
,21.118477,12.937337\H,0,8.21949,24.279421,19.800755\\Version=ES64L-GO  
9RevE.01\HF=-3817.6976358\RMSD=6.869e-09\Dipole=7.8189694,1.8154139,0.  
3098542\Quadrupole=92.7586307,27.8221219,-120.5807526,236.4260159,245.  
9185167,97.8713771\PG=C01 [X(C74H40Au2Cl4F20P2)]\@

1\1\GINC-COMPUTE041\SP\RB3LYP\Gen\C74H40Au2Cl4F20P2\CRAT\18-Sep-2020\0  
\#p b3lyp/gen pseudo=read scf=yqc counterpoise=2 empiricdispersion=  
gd3bj nosymm gfprint\CrystalExplorer Job symop = -x+y, -x, z, r = 13.  
9604\0,1\Au,0,6.040917,8.340476,12.833357\Cl,0,5.871086,10.393337,13.  
990787\Cl,0,3.732833,8.167566,12.804891\P,0,8.341955,8.522474,13.07519  
4\C,0,6.057256,6.61786,11.750736\C,0,9.44938,7.440873,12.075381\C,0,8.  
831812,8.173018,14.78546\C,0,8.870785,10.177328,12.649391\C,0,6.408011  
,6.633437,10.36982\C,0,5.697508,5.387233,12.305926\C,0,9.233531,6.0700  
49,12.061267\C,0,10.536118,8.004261,11.421387\C,0,8.02088,8.450817,15.  
844086\C,0,10.102921,7.700499,15.004243\C,0,8.415104,10.795238,11.5037  
24\C,0,9.771653,10.880914,13.446889\C,0,6.397518,5.436563,9.628781\C,0  
,6.788743,7.890026,9.598199\C,0,5.737979,4.216321,11.522544\C,0,5.2238  
4,5.272998,13.722131\H,0,8.37883,5.624531,12.555291\C,0,10.176371,5.28  
3383,11.374336\C,0,11.442983,7.181248,10.788565\H,0,10.670874,9.078852  
,11.406801\H,0,7.027976,8.845448,15.666708\C,0,8.451078,8.230135,17.17  
56\C,0,10.534619,7.482413,16.323996\H,0,10.765008,7.496693,14.171695\H  
,0,7.66458,10.296497,10.902895\C,0,8.876781,12.010286,11.103799\C,0,10  
.228833,12.124522,13.039907\H,0,10.112064,10.459542,14.384594\H,0,6.69  
2961,5.458111,8.587095\C,0,6.031775,4.252669,10.186324\C,0,7.998396,7.  
939355,8.904212\C,0,5.941837,8.957088,9.386474\H,0,5.532174,3.261678,1  
1.990691\C,0,5.9943,5.433966,14.818396\C,0,3.943736,4.893945,13.980906  
\H,0,10.064399,4.206715,11.336931\C,0,11.225636,5.880523,10.757981\H,0  
,12.325866,7.599764,10.321122\H,0,7.785995,8.445884,18.002504\C,0,9.67  
722,7.757616,17.413202\H,0,11.530972,7.101023,16.509844\H,0,8.528875,1  
2.437891,10.171503\C,0,9.788142,12.700891,11.873067\H,0,10.951027,12.6  
50524,13.652027\C,0,6.004794,2.985696,9.367654\F,0,8.855796,6.942392,8  
.948909\C,0,8.371634,9.047957,8.174936\F,0,4.696209,8.902567,9.925197\  
C,0,6.2791,10.029343,8.657199\F,0,7.317873,5.711766,14.667836\C,0,5.52  
0632,5.293768,16.121681\F,0,3.074346,4.675859,12.952864\C,0,3.414607,4  
.725188,15.246552\H,0,11.925345,5.257421,10.214789\H,0,10.011636,7.588  
081,18.429247\H,0,10.14669,13.675527,11.56583\H,0,4.978013,2.7053,9.16  
8398\H,0,6.494051,2.19176,9.918139\H,0,6.525379,3.147962,8.43183\F,0,9  
.548311,9.092093,7.560934\C,0,7.512737,10.089056,8.029082\F,0,5.378232  
,11.034095,8.520754\F,0,6.352549,5.488487,17.170897\C,0,4.233034,4.964  
043,16.321642\F,0,2.159986,4.322768,15.425342\F,0,7.817023,11.166503,7  
.316274\F,0,3.72489,4.800479,17.559059\H,0,13.600721,15.143191,11.3369  
31\C,0,14.476858,14.507886,11.374336\C,0,14.469362,13.300627,10.757981



\C,0,15.62955,14.931077,12.061267\H,0,13.579885,13.006211,10.214789\C,  
0,15.487151,12.462035,10.788565\C,0,16.708796,14.058733,12.075381\H,0,  
15.671071,15.894029,12.555291\H,0,15.408456,11.48818,10.321122\C,0,16.  
653332,12.835896,11.421387\H,0,18.1992,14.476991,13.075194\H,0,17.5162  
77,12.181899,11.406801\Au,0,19.192104,16.560747,12.833357\C,0,17.65163  
4,14.227489,14.78546\C,0,19.367931,13.191584,12.649391\Cl,0,21.05485,1  
5.681394,13.990787\Cl,0,20.1964,18.646061,12.804891\C,0,17.692106,17.4  
07906,11.750736\C,0,18.297682,14.790878,15.844086\C,0,16.606865,13.362  
937,15.004243\C,0,20.130898,13.27726,11.503724\C,0,19.526819,12.059616  
,13.446889\C,0,17.530218,17.096355,10.36982\C,0,16.806225,18.33477,12.  
305926\H,0,19.135893,15.453444,15.666708\C,0,17.891466,14.528656,17.17  
56\C,0,16.202148,13.098118,16.323996\H,0,16.099321,12.891457,14.171695  
\H,0,20.074236,14.176604,10.902895\C,0,20.95232,12.269913,11.103799\C,  
0,20.375227,11.041883,13.039907\H,0,18.991695,11.975496,14.384594\C,0,  
16.498941,17.70388,9.628781\C,0,18.428089,16.138336,9.598199\C,0,15.77  
1951,18.885178,11.522544\C,0,16.944128,18.802097,13.722131\H,0,18.4108  
51,14.996761,18.002504\C,0,16.869183,13.703047,17.413202\H,0,15.37368,  
12.425947,16.509844\H,0,21.49659,12.357407,10.171503\C,0,21.094723,11.  
135348,11.873067\H,0,20.46966,10.153443,13.652027\H,0,16.369881,17.437  
244,8.587095\C,0,15.656531,18.61257,10.186324\C,0,17.865984,15.066081,  
8.904212\C,0,19.775646,16.338249,9.386474\H,0,15.047806,19.540733,11.9  
90691\C,0,16.698301,18.054375,14.818396\C,0,17.255911,20.100225,13.980  
906\H,0,16.555151,13.4982,18.429247\H,0,21.759506,10.337518,11.56583\C  
,0,14.572791,19.269424,9.367654\F,0,16.573889,14.822035,8.948909\C,0,1  
8.639441,14.188548,8.174936\F,0,20.351242,17.444254,9.925197\C,0,20.53  
5612,15.510042,8.657199\F,0,16.277096,16.769226,14.667836\C,0,16.81372  
1,18.534683,16.121681\F,0,17.50174,20.962183,12.952864\C,0,17.374329,2  
0.642841,15.246552\H,0,14.843651,20.29884,9.168398\H,0,13.640293,19.24  
2682,9.918139\H,0,14.453024,18.737452,8.43183\F,0,18.089327,13.147448,  
7.560934\C,0,19.97051,14.411826,8.029082\F,0,21.856188,15.787842,8.520  
754\F,0,16.566395,17.71686,17.170897\C,0,17.171968,19.814636,16.321642  
\F,0,17.653131,21.930586,15.425342\F,0,20.751461,13.609582,7.316274\F,  
0,17.284391,20.336483,17.559059\\Version=ES64L-G09RevE.01\HF=-3817.697  
6458\RMSD=6.863e-09\Dipole=0.7576261,-4.5049471,-1.3761603\Quadrupole=  
-3.3498097,-75.779554,79.1293637,-164.4492264,-7.3177306,-141.4098631\  
PG=C01 [X(C74H40Au2Cl4F20P2)]\@

1\1\GINC-COMPUTE008\SP\RB3LYP\Gen\C74H40Au2Cl4F20P2\CRAT\18-Sep-2020\0  
\#p b3lyp/gen pseudo=read scf=yqc counterpoise=2 empiricaldispersion=  
gd3bj nosymm gfpint\CrystalExplorer Job symop = x-y, x, -z, r = 10.4  
624\0,1\Au,0,6.040917,8.340476,12.833357\Cl,0,5.871086,10.393337,13.9  
90787\Cl,0,3.732833,8.167566,12.804891\H,0,8.341955,8.522474,13.075194  
\C,0,6.057256,6.61786,11.750736\C,0,9.44938,7.440873,12.075381\C,0,8.8  
31812,8.173018,14.78546\C,0,8.870785,10.177328,12.649391\C,0,6.408011,  
6.633437,10.36982\C,0,5.697508,5.387233,12.305926\C,0,9.233531,6.07004  
9,12.061267\C,0,10.536118,8.004261,11.421387\C,0,8.02088,8.450817,15.8  
44086\C,0,10.102921,7.700499,15.004243\C,0,8.415104,10.795238,11.50372  
4\C,0,9.771653,10.880914,13.446889\C,0,6.397518,5.436563,9.628781\C,0,  
6.788743,7.890026,9.598199\C,0,5.737979,4.216321,11.522544\C,0,5.22384  
,5.272998,13.722131\H,0,8.37883,5.624531,12.555291\C,0,10.176371,5.283  
383,11.374336\C,0,11.442983,7.181248,10.788565\H,0,10.670874,9.078852,  
11.406801\H,0,7.027976,8.845448,15.666708\C,0,8.451078,8.230135,17.175  
6\C,0,10.534619,7.482413,16.323996\H,0,10.765008,7.496693,14.171695\H,

0,7.66458,10.296497,10.902895\C,0,8.876781,12.010286,11.103799\C,0,10.228833,12.124522,13.039907\H,0,10.112064,10.459542,14.384594\H,0,6.692961,5.458111,8.587095\C,0,6.031775,4.252669,10.186324\C,0,7.998396,7.939355,8.904212\C,0,5.941837,8.957088,9.386474\H,0,5.532174,3.261678,11.990691\C,0,5.9943,5.433966,14.818396\C,0,3.943736,4.893945,13.980906\H,0,10.064399,4.206715,11.336931\C,0,11.225636,5.880523,10.757981\H,0,12.325866,7.599764,10.321122\H,0,7.785995,8.445884,18.002504\C,0,9.67722,7.757616,17.413202\H,0,11.530972,7.101023,16.509844\H,0,8.528875,12.437891,10.171503\C,0,9.788142,12.700891,11.873067\H,0,10.951027,12.650524,13.652027\C,0,6.004794,2.985696,9.367654\F,0,8.855796,6.942392,8.948909\C,0,8.371634,9.047957,8.174936\F,0,4.696209,8.902567,9.925197\C,0,6.2791,10.029343,8.657199\F,0,7.317873,5.711766,14.667836\C,0,5.520632,5.293768,16.121681\F,0,3.074346,4.675859,12.952864\C,0,3.414607,4.725188,15.246552\H,0,11.925345,5.257421,10.214789\H,0,10.011636,7.588081,18.429247\H,0,10.14669,13.675527,11.56583\H,0,4.978013,2.7053,9.168398\H,0,6.494051,2.19176,9.918139\H,0,6.525379,3.147962,8.43183\F,0,9.548311,9.092093,7.560934\C,0,7.512737,10.089056,8.029082\F,0,5.378232,11.034095,8.520754\F,0,6.352549,5.488487,17.170897\C,0,4.233034,4.964043,16.321642\F,0,2.159986,4.322768,15.425342\F,0,7.817023,11.166503,7.316274\F,0,3.72489,4.800479,17.559059\H,0,1.388776,10.819383,12.188066\C,0,0.51264,11.454687,12.150661\C,0,-0.640053,11.031498,11.463732\C,0,0.520135,12.661947,12.767016\C,0,-1.719297,11.90384,11.449616\H,0,-0.681574,10.068545,10.969707\H,0,1.409611,12.956363,13.310208\C,0,-0.497653,13.500538,12.736434\P,0,-3.209703,11.485583,10.449804\C,0,-1.663836,13.126677,12.103612\H,0,-0.418958,14.474395,13.203876\Au,0,-4.202607,9.401827,10.691641\C,0,-2.662136,11.735084,8.739536\C,0,-4.378434,12.77099,10.875607\H,0,-2.526781,13.780674,12.118197\C,0,-2.702608,8.554667,11.774261\Cl,0,-6.065353,10.281179,9.534211\Cl,0,-5.206903,7.316512,10.720106\C,0,-3.308184,11.171696,7.680912\C,0,-1.617368,12.599638,8.520754\C,0,-5.1414,12.685313,12.021274\C,0,-4.537323,13.902958,10.078109\C,0,-2.540722,8.866219,13.155178\C,0,-1.816728,7.627804,11.219071\H,0,-4.146397,10.50913,7.85829\C,0,-2.901968,11.433918,6.349397\C,0,-1.212652,12.864456,7.201002\H,0,-1.109824,13.071117,9.353304\H,0,-5.08474,11.78597,12.622102\C,0,-5.962825,13.692662,12.421199\C,0,-5.385729,14.920691,10.485091\H,0,-4.002198,13.987077,9.140403\C,0,-1.509444,8.258695,13.896215\C,0,-3.438592,9.824238,13.926799\C,0,-0.782453,7.077397,12.002455\C,0,-1.954632,7.160478,9.802867\H,0,-3.421354,10.965813,5.522493\C,0,-1.879685,12.259528,6.111794\H,0,-0.384183,13.536628,7.015154\H,0,-6.507094,13.605168,13.353495\C,0,-6.105225,14.827226,11.651931\H,0,-5.480163,15.809131,9.872971\C,0,-0.667034,7.350005,13.338673\H,0,-1.380384,8.52533,14.937903\C,0,-2.876487,10.896492,14.620787\C,0,-4.786149,9.624326,14.138524\H,0,-0.05831,6.421843,11.534307\C,0,-1.708804,7.9082,8.706601\C,0,-2.266413,5.862349,9.544091\H,0,-1.565654,12.464373,5.09575\H,0,-6.77001,15.625056,11.959168\C,0,0.416707,6.693151,14.157344\F,0,-1.584392,11.14054,14.576089\C,0,-3.649945,11.774027,15.35006\F,0,-5.361746,8.51832,13.599802\C,0,-5.546116,10.452532,14.867799\F,0,-1.287599,9.193347,8.857162\C,0,-1.824223,7.427892,7.403317\F,0,-2.512241,5.000391,10.572134\C,0,-2.38483,5.319731,8.278447\H,0,0.145847,5.663735,14.356601\H,0,1.349204,6.719893,13.606859\H,0,0.536473,7.225124,15.093167\F,0,-3.09983,12.815126,15.964064\C,0,-4.981012,11.550749,15.495915\F,0,-6.866692,10.174732,15.004243\F,0,-1.576896,8.245714,6.354102\C,0,-2.182472,6.147937,7.203354\F,0,-2.663635,4.031988,8.099657\F,0,-5.761966,12.352993,16.208723\F,0,-2.294893,5.62609,5.96594\\Versio

n=ES64L-G09RevE.01\HF=-3817.6976408\RMSD=6.862e-09\Dipole=8.7383637,1.137572,0.2175823\Quadrupole=15.219569,18.9235509,-34.1431199,104.3303156,189.0949668,21.1263118\PG=C01 [X(C74H40Au2Cl4F20P2)]\@

### Compound 3b

1\1\GINC-COMPUTE041\SP\RB3LYP\Gen\C72H30Au2Cl4F26P2\CRAT\18-Sep-2020\0  
\#p b3lyp/gen pseudo=read counterpoise=2 empiricaldispersion=gd3bj no  
symm gfprint\CrystalExplorer Job symop = x, y, z, r = 10.384\0,1\H,0  
,-1.405725,4.438617,6.731711\C,0,-0.463708,4.612436,7.23702\C,0,-0.261  
154,4.110392,8.505737\C,0,0.531718,5.337443,6.609924\C,0,0.94661,4.304  
536,9.135254\H,0,-1.051578,3.562845,9.004024\C,0,1.747952,5.546754,7.2  
63653\H,0,0.369066,5.742112,5.618678\C,0,1.954344,5.003757,8.500895\H,  
0,1.107261,3.908209,10.130132\P,0,3.056298,6.529002,6.48281\H,0,2.9155  
88,5.121306,8.985622\Au,0,4.852028,5.148152,5.961279\C,0,3.287514,7.94  
7769,7.590517\C,0,2.40037,7.22883,4.944126\Cl,0,3.273652,3.639745,5.13  
4192\Cl,0,6.543721,3.741215,5.203681\C,0,6.323387,6.343048,6.716457\C,  
0,4.33689,8.850236,7.355659\C,0,2.332058,8.243536,8.554162\C,0,2.55639  
1,6.596345,3.723832\C,0,1.68806,8.410378,4.994972\C,0,7.147326,7.07260  
5,5.852083\C,0,6.589951,6.344565,8.098973\H,0,5.087709,8.634402,6.6055  
66\C,0,4.398926,10.025717,8.098973\C,0,2.424787,9.425084,9.275684\H,0,  
1.516869,7.555083,8.739385\H,0,3.125113,5.67674,3.662576\C,0,1.994636,  
7.128725,2.590703\C,0,1.123485,8.936691,3.859421\H,0,1.573592,8.926831  
,5.939973\C,0,8.193188,7.818846,6.387172\C,0,7.012127,7.087772,4.36303  
4\C,0,7.659499,7.105973,8.559004\C,0,5.832413,5.564955,9.10862\H,0,5.2  
09247,10.724635,7.932393\C,0,3.44746,10.304799,9.038404\H,0,1.684252,9  
.652444,10.032557\H,0,2.115167,6.625315,1.639406\C,0,1.281747,8.296622  
,2.663339\H,0,0.553853,9.856145,3.913656\F,0,8.993299,8.512303,5.56492  
6\C,0,8.456908,7.846147,7.733369\C,0,6.067505,7.864348,3.704463\C,0,7.  
956422,6.452254,3.576138\F,0,7.949246,7.10749,9.870577\C,0,5.114925,6.  
177722,10.113425\C,0,5.906926,4.171062,9.178836\H,0,3.501013,11.229712  
,9.599159\H,0,0.841147,8.715852,1.767247\F,0,9.500862,8.527168,8.20744  
3\F,0,5.183177,8.577221,4.408311\C,0,6.02985,7.965971,2.343739\F,0,8.9  
33347,5.742415,4.131566\C,0,7.936265,6.531125,2.20815\F,0,5.070955,7.5  
19742,10.158945\C,0,4.450375,5.480017,11.084334\F,0,6.679865,3.4999,8.  
31543\C,0,5.262105,3.46274,10.149744\F,0,5.118653,8.751648,1.760225\C,  
0,6.970908,7.29405,1.600425\F,0,8.861542,5.910774,1.466532\F,0,3.71672  
,6.112502,12.00028\C,0,4.512689,4.105842,11.101282\F,0,5.377394,2.1160  
17,10.192115\F,0,6.956409,7.40629,0.262702\F,0,3.869386,3.40662,12.034  
177\Cl,0,-3.840278,3.741215,5.203681\Au,0,-5.531972,5.148152,5.961279\  
C,0,-4.060613,6.343048,6.716457\Cl,0,-7.110348,3.639745,5.134192\P,0,-  
7.327701,6.529002,6.48281\C,0,-3.236673,7.072605,5.852083\C,0,-3.79405  
,6.344565,8.098973\C,0,-7.096486,7.947769,7.590517\C,0,-8.636047,5.546  
754,7.263653\C,0,-7.98363,7.22883,4.944126\C,0,-2.190812,7.818846,6.38  
7172\C,0,-3.371873,7.087772,4.363034\C,0,-2.724501,7.105973,8.559004\C  
,0,-4.551587,5.564955,9.10862\C,0,-6.04711,8.850236,7.355659\C,0,-8.05  
1942,8.243536,8.554162\C,0,-8.429656,5.003757,8.500895\C,0,-9.852282,5  
.337443,6.609924\C,0,-7.827609,6.596345,3.723832\C,0,-8.69594,8.410378  
,4.994972\F,0,-1.3907,8.512303,5.564926\C,0,-1.927091,7.846147,7.73336  
9\C,0,-2.427578,6.452254,3.576138\C,0,-4.316494,7.864348,3.704463\F,0,  
-2.434753,7.10749,9.870577\C,0,-4.477074,4.171062,9.178836\C,0,-5.2690  
74,6.177722,10.113425\H,0,-5.29629,8.634402,6.605566\C,0,-5.985074,10.  
025717,8.098973\C,0,-7.959212,9.425084,9.275684\H,0,-8.86713,7.555083,

8.739385\H,0,-7.468412,5.121306,8.985622\C,0,-9.43739,4.304536,9.135254\C,0,-10.847708,4.612436,7.23702\H,0,-10.014934,5.742112,5.618678\H,0,-7.258886,5.67674,3.662576\C,0,-8.389363,7.128725,2.590703\C,0,-9.260514,8.936691,3.859421\H,0,-8.810408,8.926831,5.939973\F,0,-0.883138,8.527168,8.207443\F,0,-1.450654,5.742415,4.131566\C,0,-2.447734,6.531125,2.20815\C,0,-4.35415,7.965971,2.343739\F,0,-5.200822,8.577221,4.408311\F,0,-3.704135,3.4999,8.31543\C,0,-5.121895,3.46274,10.149744\F,0,-5.313045,7.519742,10.158945\C,0,-5.933625,5.480017,11.084334\H,0,-5.174753,10.724635,7.932393\C,0,-6.93654,10.304799,9.038404\H,0,-8.699748,9.652444,10.032557\H,0,-9.276739,3.908209,10.130132\C,0,-10.645154,4.110392,8.505737\H,0,-11.789725,4.438617,6.731711\H,0,-8.268833,6.625315,1.639406\C,0,-9.102253,8.296622,2.663339\H,0,-9.830147,9.856145,3.913656\F,0,-1.522458,5.910774,1.466532\C,0,-3.413091,7.29405,1.600425\F,0,-5.265347,8.751648,1.760225\F,0,-5.006606,2.116017,10.192115\C,0,-5.871311,4.105842,11.101282\F,0,-6.66728,6.112502,12.00028\H,0,-6.882987,11.229712,9.599159\H,0,-11.435577,3.562845,9.004024\H,0,-9.542853,8.715852,1.767247\F,0,-3.427592,7.40629,0.262702\F,0,-6.514613,3.40662,12.034177\\Version=ES64L-G09RevE.01\HF=-4076.0765958\RMSD=5.133e-09\Dipole=-6.730141,5.9401283,2.1800247\Quadrupole=-38.2916305,54.5311536,-16.2395231,-86.2509902,-80.0574979,87.4155613\PG=C01 [X(C72H30Au2Cl4F26P2)]\@

1\1\GINC-COMPUTE040\SP\RB3LYP\Gen\C72H30Au2Cl4F26P2\CRAT\18-Sep-2020\0  
\\#p b3lyp/gen pseudo=read counterpoise=2 empiricaldispersion=gd3bj no  
symm gfpint\CrystalExplorer Job symop = -x+1/2, y+1/2, -z+1/2, r = 9  
.83399\0,1\H,0,-1.405725,4.438617,6.731711\C,0,-0.463708,4.612436,7.23702\C,0,-0.261154,4.110392,8.505737\C,0,0.531718,5.337443,6.609924\C,0,0.94661,4.304536,9.135254\H,0,-1.051578,3.562845,9.004024\C,0,1.747952,5.546754,7.263653\H,0,0.369066,5.742112,5.618678\C,0,1.954344,5.003757,8.500895\H,0,1.107261,3.908209,10.130132\p,0,3.056298,6.529002,6.48281\H,0,2.915588,5.121306,8.985622\Au,0,4.852028,5.148152,5.961279\C,0,3.287514,7.947769,7.590517\C,0,2.40037,7.22883,4.944126\Cl,0,3.273652,3.639745,5.134192\Cl,0,6.543721,3.741215,5.203681\C,0,6.323387,6.343048,6.716457\C,0,4.33689,8.850236,7.355659\C,0,2.332058,8.243536,8.554162\C,0,2.556391,6.596345,3.723832\C,0,1.68806,8.410378,4.994972\C,0,7.147326,7.072605,5.852083\C,0,6.589951,6.344565,8.098973\H,0,5.087709,8.634402,6.605566\C,0,4.398926,10.025717,8.098973\C,0,2.424787,9.425084,9.275684\H,0,1.516869,7.555083,8.739385\H,0,3.125113,5.67674,3.662576\C,0,1.994636,7.128725,2.590703\C,0,1.123485,8.936691,3.859421\H,0,1.573592,8.926831,5.939973\C,0,8.193188,7.818846,6.387172\C,0,7.012127,7.087772,4.363034\C,0,7.659499,7.105973,8.559004\C,0,5.832413,5.564955,9.10862\H,0,5.209247,10.724635,7.932393\C,0,3.44746,10.304799,9.038404\H,0,1.684252,9.652444,10.032557\H,0,2.115167,6.625315,1.639406\C,0,1.281747,8.296622,2.663339\H,0,0.553853,9.856145,3.913656\F,0,8.993299,8.512303,5.564926\C,0,8.456908,7.846147,7.733369\C,0,6.067505,7.864348,3.704463\C,0,7.956422,6.452254,3.576138\F,0,7.949246,7.10749,9.870577\C,0,5.114925,6.177722,10.113425\C,0,5.906926,4.171062,9.178836\H,0,3.501013,11.229712,9.599159\H,0,0.841147,8.715852,1.767247\F,0,9.500862,8.527168,8.207443\F,0,5.183177,8.577221,4.408311\C,0,6.02985,7.965971,2.343739\F,0,8.933347,5.742415,4.131566\C,0,7.936265,6.531125,2.20815\F,0,5.070955,7.519742,10.158945\C,0,4.450375,5.480017,11.084334\F,0,6.679865,3.4999,8.31543\C,0,5.262105,3.46274,10.149744\F,0,5.118653,8.751648,1.760225\C,0,6.970908,7.29405,1.600425\F,0,8.861542,5.910774,1.466

532\F,0,3.71672,6.112502,12.00028\C,0,4.512689,4.105842,11.101282\F,0,  
5.377394,2.116017,10.192115\F,0,6.956409,7.40629,0.262702\F,0,3.869386  
,3.40662,12.034177\F,0,-1.466895,0.993471,7.697777\C,0,-2.351222,0.280  
598,8.401625\C,0,-2.313567,0.382221,9.762349\C,0,-3.295844,-0.495978,7  
.743053\F,0,-1.40237,1.167897,10.345862\C,0,-3.254625,-0.2897,10.50566  
3\C,0,-3.431043,-0.511145,6.254005\C,0,-4.240139,-1.131496,8.529949\F,  
0,-3.240125,-0.17746,11.843386\C,0,-4.219983,-1.052625,9.897938\C,0,-2  
.607104,-1.240701,5.38963\C,0,-4.476905,0.235096,5.718916\F,0,-5.21706  
3,-1.841335,7.974522\F,0,-5.145258,-1.672976,10.639556\Au,0,-1.135744,  
-2.435597,6.144808\C,0,-2.873667,-1.239185,4.007115\F,0,-5.277017,0.92  
8554,6.541161\C,0,-4.740625,0.262398,4.372719\P,0,0.659985,-1.054749,5  
.623278\Cl,0,0.442632,-3.944005,6.971896\Cl,0,-2.827438,-3.842535,6.90  
2407\C,0,-3.943215,-0.477776,3.547084\C,0,-2.11613,-2.018794,2.997467\  
F,0,-5.784579,0.943418,3.898644\C,0,1.315913,-0.35492,7.161962\C,0,0.4  
28769,0.36402,4.515571\C,0,1.968331,-2.036995,4.842435\F,0,-4.232963,-  
0.47626,2.23551\C,0,-1.398642,-1.406027,1.992662\C,0,-2.190642,-3.4126  
88,2.927252\C,0,2.028223,0.826628,7.111116\C,0,1.159892,-0.987405,8.38  
2255\C,0,-0.620607,1.266486,4.750429\C,0,1.384225,0.659786,3.551926\C,  
0,1.76194,-2.579991,3.605193\C,0,3.184566,-2.246307,5.496164\F,0,-1.35  
4672,-0.064007,1.947143\C,0,-0.734091,-2.103732,1.021754\F,0,-2.963582  
,-4.083849,3.790658\C,0,-1.545821,-4.12101,1.956344\C,0,2.592798,1.352  
941,8.246667\H,0,2.142691,1.343082,6.166114\C,0,1.721647,-0.455025,9.5  
15385\H,0,0.59117,-1.90701,8.443512\H,0,-1.371427,1.050652,5.500522\C,  
0,-0.682643,2.441967,4.007115\C,0,1.291496,1.841334,2.830403\H,0,2.199  
414,-0.028667,3.366703\H,0,0.800696,-2.462444,3.120465\C,0,2.769674,-3  
.279213,2.970834\C,0,4.179992,-2.971314,4.869069\H,0,3.347217,-1.84163  
9,6.487411\F,0,-0.000437,-1.471248,0.105807\C,0,-0.796406,-3.477908,1.  
004805\F,0,-1.66111,-5.467732,1.913972\C,0,2.434536,0.712872,9.442748\  
H,0,3.162429,2.272394,8.192432\H,0,1.601116,-0.958435,10.466681\H,0,-1  
.492964,3.140886,4.173695\C,0,0.268823,2.721049,3.067683\H,0,2.032031,  
2.068695,2.073531\H,0,2.609023,-3.67554,1.975956\C,0,3.977437,-3.47335  
7,3.60035\H,0,5.122009,-3.145133,5.374377\F,0,-0.153103,-4.177129,0.07  
191\H,0,2.875137,1.132102,10.338841\H,0,0.21527,3.645963,2.506929\H,0,  
4.767861,-4.020905,3.102064\\Version=ES64L-G09RevE.01\HF=-4076.0765856  
\RMSD=5.133e-09\Dipole=0.5124416,6.5109264,-0.0549068\Quadrupole=-46.5  
458271,45.625488,0.9203391,-18.0380119,17.8883452,92.512383\PG=C01 [X(  
C72H30Au2Cl4F26P2)]\@

1\1\GINC-COMPUTE035\SP\RB3LYP\Gen\C37H16Au1Cl5F13P1\CRAT\18-Sep-2020\0  
\#p b3lyp/gen pseudo=read counterpoise=2 empiricaldispersion=gd3bj no  
symm gfprint\CrystalExplorer Job symop = -, r = 9.10485\0,1\H,0,-1.4  
05725,4.438617,6.731711\C,0,-0.463708,4.612436,7.23702\C,0,-0.261154,4  
.110392,8.505737\C,0,0.531718,5.337443,6.609924\C,0,0.94661,4.304536,9  
.135254\H,0,-1.051578,3.562845,9.004024\C,0,1.747952,5.546754,7.263653  
\H,0,0.369066,5.742112,5.618678\C,0,1.954344,5.003757,8.500895\H,0,1.1  
07261,3.908209,10.130132\P,0,3.056298,6.529002,6.48281\H,0,2.915588,5.  
121306,8.985622\Au,0,4.852028,5.148152,5.961279\C,0,3.287514,7.947769,  
7.590517\C,0,2.40037,7.22883,4.944126\Cl,0,3.273652,3.639745,5.134192\  
Cl,0,6.543721,3.741215,5.203681\C,0,6.323387,6.343048,6.716457\C,0,4.3  
3689,8.850236,7.355659\C,0,2.332058,8.243536,8.554162\C,0,2.556391,6.5  
96345,3.723832\C,0,1.68806,8.410378,4.994972\C,0,7.147326,7.072605,5.8  
52083\C,0,6.589951,6.344565,8.098973\H,0,5.087709,8.634402,6.605566\C,  
0,4.398926,10.025717,8.098973\C,0,2.424787,9.425084,9.275684\H,0,1.516

869,7.555083,8.739385\H,0,3.125113,5.67674,3.662576\C,0,1.994636,7.128  
725,2.590703\C,0,1.123485,8.936691,3.859421\H,0,1.573592,8.926831,5.93  
9973\C,0,8.193188,7.818846,6.387172\C,0,7.012127,7.087772,4.363034\C,0  
,7.659499,7.105973,8.559004\C,0,5.832413,5.564955,9.10862\H,0,5.209247  
,10.724635,7.932393\C,0,3.44746,10.304799,9.038404\H,0,1.684252,9.6524  
44,10.032557\H,0,2.115167,6.625315,1.639406\C,0,1.281747,8.296622,2.66  
3339\H,0,0.553853,9.856145,3.913656\F,0,8.993299,8.512303,5.564926\C,0  
,8.456908,7.846147,7.733369\C,0,6.067505,7.864348,3.704463\C,0,7.95642  
2,6.452254,3.576138\F,0,7.949246,7.10749,9.870577\C,0,5.114925,6.17772  
2,10.113425\C,0,5.906926,4.171062,9.178836\H,0,3.501013,11.229712,9.59  
9159\H,0,0.841147,8.715852,1.767247\F,0,9.500862,8.527168,8.207443\F,0  
,5.183177,8.577221,4.408311\C,0,6.02985,7.965971,2.343739\F,0,8.933347  
,5.742415,4.131566\C,0,7.936265,6.531125,2.20815\F,0,5.070955,7.519742  
,10.158945\C,0,4.450375,5.480017,11.084334\F,0,6.679865,3.4999,8.31543  
\C,0,5.262105,3.46274,10.149744\F,0,5.118653,8.751648,1.760225\C,0,6.9  
70908,7.29405,1.600425\F,0,8.861542,5.910774,1.466532\F,0,3.71672,6.11  
2502,12.00028\C,0,4.512689,4.105842,11.101282\F,0,5.377394,2.116017,10  
.192115\F,0,6.956409,7.40629,0.262702\F,0,3.869386,3.40662,12.034177\C  
,0,-1.444203,10.731005,10.5783\H,0,-1.174394,10.489842,9.557514\C,0,-  
0.829893,12.316313,10.939545\C,0,-0.724553,9.546576,11.617244\C,0,-3  
.178757,10.694451,10.701055\\Version=ES64L-G09RevE.01\HF=-1419.2745885  
\RMSD=1.831e-09\Dipole=-2.9012385,2.9498344,0.7499746\Quadrupole=-54.1  
559542,50.6995526,3.4564016,-6.7138859,-21.2803017,35.272502\PG=C01 [X  
(C37H16Au1Cl5F13P1)]\@\

1\1\GINC-COMPUTE035\SP\RB3LYP\Gen\C72H30Au2Cl4F26P2\CRAT\18-Sep-2020\0  
\#p b3lyp/gen pseudo=read counterpoise=2 empiricaldispersion=gd3bj no  
symm gfprint\CrystalExplorer Job symop = -x+1/2, y+1/2, -z+1/2, r = 8  
.72648\0,1\H,0,-1.405725,4.438617,6.731711\C,0,-0.463708,4.612436,7.2  
3702\C,0,-0.261154,4.110392,8.505737\C,0,0.531718,5.337443,6.609924\C,  
0,0.94661,4.304536,9.135254\H,0,-1.051578,3.562845,9.004024\C,0,1.7479  
52,5.546754,7.263653\H,0,0.369066,5.742112,5.618678\C,0,1.954344,5.003  
757,8.500895\H,0,1.107261,3.908209,10.130132\P,0,3.056298,6.529002,6.4  
8281\H,0,2.915588,5.121306,8.985622\Au,0,4.852028,5.148152,5.961279\C,  
0,3.287514,7.947769,7.590517\C,0,2.40037,7.22883,4.944126\C,0,3.27365  
2,3.639745,5.134192\C,0,6.543721,3.741215,5.203681\C,0,6.323387,6.343  
048,6.716457\C,0,4.33689,8.850236,7.355659\C,0,2.332058,8.243536,8.554  
162\C,0,2.556391,6.596345,3.723832\C,0,1.68806,8.410378,4.994972\C,0,7  
.147326,7.072605,5.852083\C,0,6.589951,6.344565,8.098973\H,0,5.087709,  
8.634402,6.605566\C,0,4.398926,10.025717,8.098973\C,0,2.424787,9.42508  
4,9.275684\H,0,1.516869,7.555083,8.739385\H,0,3.125113,5.67674,3.66257  
6\C,0,1.994636,7.128725,2.590703\C,0,1.123485,8.936691,3.859421\H,0,1.  
573592,8.926831,5.939973\C,0,8.193188,7.818846,6.387172\C,0,7.012127,7  
.087772,4.363034\C,0,7.659499,7.105973,8.559004\C,0,5.832413,5.564955,  
9.10862\H,0,5.209247,10.724635,7.932393\C,0,3.44746,10.304799,9.038404  
\H,0,1.684252,9.652444,10.032557\H,0,2.115167,6.625315,1.639406\C,0,1.  
281747,8.296622,2.663339\H,0,0.553853,9.856145,3.913656\F,0,8.993299,8  
.512303,5.564926\C,0,8.456908,7.846147,7.733369\C,0,6.067505,7.864348,  
3.704463\C,0,7.956422,6.452254,3.576138\F,0,7.949246,7.10749,9.870577\  
C,0,5.114925,6.177722,10.113425\C,0,5.906926,4.171062,9.178836\H,0,3.5  
01013,11.229712,9.599159\H,0,0.841147,8.715852,1.767247\F,0,9.500862,8  
.527168,8.207443\F,0,5.183177,8.577221,4.408311\C,0,6.02985,7.965971,2  
.343739\F,0,8.933347,5.742415,4.131566\C,0,7.936265,6.531125,2.20815\F

,0,5.070955,7.519742,10.158945\C,0,4.450375,5.480017,11.084334\F,0,6.679865,3.4999,8.31543\C,0,5.262105,3.46274,10.149744\F,0,5.118653,8.751648,1.760225\C,0,6.970908,7.29405,1.600425\F,0,8.861542,5.910774,1.466532\F,0,3.71672,6.112502,12.00028\C,0,4.512689,4.105842,11.101282\F,0,5.377394,2.116017,10.192115\F,0,6.956409,7.40629,0.262702\F,0,3.869386,3.40662,12.034177\F,0,7.143875,-0.17746,11.843386\C,0,7.129375,-0.2897,10.505663\C,0,6.164017,-1.052625,9.897938\C,0,8.070433,0.382221,9.762349\C,0,6.143861,-1.131496,8.529949\F,0,5.238741,-1.672976,10.639556\F,0,8.98163,1.167897,10.345862\C,0,8.032778,0.280598,8.401625\F,0,5.166937,-1.841335,7.974522\C,0,7.088156,-0.495978,7.743053\F,0,8.917106,0.993471,7.697777\C,0,6.952957,-0.511145,6.254005\C,0,5.907095,0.235096,5.718916\C,0,7.776896,-1.240701,5.38963\F,0,5.106983,0.928554,6.541161\C,0,5.643374,0.262398,4.372719\C,0,7.510333,-1.239185,4.007115\Au,0,9.248256,-2.435597,6.144808\F,0,4.599421,0.943418,3.898644\C,0,6.440784,-0.477776,3.547084\C,0,8.26787,-2.018794,2.997467\P,0,11.043984,-1.054749,5.623278\Cl,0,10.826632,-3.944005,6.971896\Cl,0,7.556562,-3.842535,6.902407\F,0,6.151037,-0.47626,2.23551\C,0,8.985358,-1.406027,1.992662\C,0,8.193357,-3.412688,2.927252\C,0,10.812769,0.36402,4.515571\C,0,12.352331,-2.036995,4.842435\C,0,11.699913,-0.35492,7.161962\F,0,9.029327,-0.064007,1.947143\C,0,9.649908,-2.103732,1.021754\F,0,7.420418,-4.083849,3.790658\C,0,8.838179,-4.12101,1.956344\C,0,9.763392,1.266486,4.750429\C,0,11.768225,0.659786,3.551926\C,0,12.14594,-2.579991,3.605193\C,0,13.568565,-2.246307,5.496164\C,0,11.543892,-0.987405,8.382255\C,0,12.412223,0.826628,7.111116\F,0,10.383563,-1.471248,0.105807\C,0,9.587594,-3.477908,1.004805\F,0,8.72289,-5.467732,1.913972\H,0,9.012573,1.050652,5.500522\C,0,9.701357,2.441967,4.007115\C,0,11.675495,1.841334,2.830403\H,0,12.583414,-0.028667,3.366703\H,0,11.184695,-2.462444,3.120465\C,0,13.153673,-3.279213,2.970834\C,0,14.563992,-2.971314,4.869069\H,0,13.731216,-1.841639,6.487411\H,0,10.97517,-1.90701,8.443512\C,0,12.105647,-0.455025,9.515385\C,0,12.976798,1.352941,8.246667\H,0,12.52669,1.343082,6.166114\F,0,10.230897,-4.177129,0.07191\H,0,8.891036,3.140886,4.173695\C,0,10.652822,2.721049,3.067683\H,0,12.416031,2.068695,2.073531\H,0,12.993022,-3.67554,1.975956\C,0,14.361437,-3.473357,3.60035\H,0,15.506008,-3.145133,5.374377\H,0,11.985116,-0.958435,10.466681\C,0,12.818536,0.712872,9.442748\H,0,13.54643,2.272394,8.192432\H,0,10.59927,3.645963,2.506929\H,0,15.151861,-4.020905,3.102064\H,0,13.259136,1.132102,10.338841\\Version=ES64L-G09RevE.01\HF=-4076.0765866\RMSE=5.133e-09\Dipole=-0.9666907,6.9137515,0.0519136\Quadrupole=13.1988316,13.7988952,-26.9977268,46.390686,-19.9124354,95.5562111\PG=C01 [X(C72H30Au2Cl4F26P2)]\@\

1\1\GINC-COMPUTE041\SP\RB3LYP\Gen\C37H16Au1Cl5F13P1\CRAT\18-Sep-2020\0  
\\#p b3lyp/gen pseudo=read counterpoise=2 empiricaldispersion=gd3bj no  
symm gfprint\CrystalExplorer Job symop = -, r = 9.47032\0,1\H,0,-1.405725,4.438617,6.731711\C,0,-0.463708,4.612436,7.23702\C,0,-0.261154,4.110392,8.505737\C,0,0.531718,5.337443,6.609924\C,0,0.94661,4.304536,9.135254\H,0,-1.051578,3.562845,9.004024\C,0,1.747952,5.546754,7.263653\H,0,0.369066,5.742112,5.618678\C,0,1.954344,5.003757,8.500895\H,0,1.107261,3.908209,10.130132\P,0,3.056298,6.529002,6.48281\H,0,2.915588,5.121306,8.985622\Au,0,4.852028,5.148152,5.961279\C,0,3.287514,7.947769,7.590517\C,0,2.40037,7.22883,4.944126\Cl,0,3.273652,3.639745,5.134192\Cl,0,6.543721,3.741215,5.203681\C,0,6.323387,6.343048,6.716457\C,0,4.33689,8.850236,7.355659\C,0,2.332058,8.243536,8.554162\C,0,2.556391,6.5

96345,3.723832\C,0,1.68806,8.410378,4.994972\C,0,7.147326,7.072605,5.8  
52083\C,0,6.589951,6.344565,8.098973\H,0,5.087709,8.634402,6.605566\C,  
0,4.398926,10.025717,8.098973\C,0,2.424787,9.425084,9.275684\H,0,1.516  
869,7.555083,8.739385\H,0,3.125113,5.67674,3.662576\C,0,1.994636,7.128  
725,2.590703\C,0,1.123485,8.936691,3.859421\H,0,1.573592,8.926831,5.93  
9973\C,0,8.193188,7.818846,6.387172\C,0,7.012127,7.087772,4.363034\C,0  
,7.659499,7.105973,8.559004\C,0,5.832413,5.564955,9.10862\H,0,5.209247  
,10.724635,7.932393\C,0,3.44746,10.304799,9.038404\H,0,1.684252,9.6524  
44,10.032557\H,0,2.115167,6.625315,1.639406\C,0,1.281747,8.296622,2.66  
3339\H,0,0.553853,9.856145,3.913656\F,0,8.993299,8.512303,5.564926\C,0  
,8.456908,7.846147,7.733369\C,0,6.067505,7.864348,3.704463\C,0,7.95642  
2,6.452254,3.576138\F,0,7.949246,7.10749,9.870577\C,0,5.114925,6.17772  
2,10.113425\C,0,5.906926,4.171062,9.178836\H,0,3.501013,11.229712,9.59  
9159\H,0,0.841147,8.715852,1.767247\F,0,9.500862,8.527168,8.207443\F,0  
,5.183177,8.577221,4.408311\C,0,6.02985,7.965971,2.343739\F,0,8.933347  
,5.742415,4.131566\C,0,7.936265,6.531125,2.20815\F,0,5.070955,7.519742  
,10.158945\C,0,4.450375,5.480017,11.084334\F,0,6.679865,3.4999,8.31543  
\C,0,5.262105,3.46274,10.149744\F,0,5.118653,8.751648,1.760225\C,0,6.9  
70908,7.29405,1.600425\F,0,8.861542,5.910774,1.466532\F,0,3.71672,6.11  
2502,12.00028\C,0,4.512689,4.105842,11.101282\F,0,5.377394,2.116017,10  
.192115\F,0,6.956409,7.40629,0.262702\F,0,3.869386,3.40662,12.034177\C  
l,0,5.837823,10.434937,-1.166542\C,0,5.223513,12.020244,-1.527788\Cl,0  
,3.488959,12.056797,-1.405033\Cl,0,5.943163,13.204673,-0.488844\H,0,5.  
493321,12.261406,-2.548574\\Version=ES64L-G09RevE.01\HF=-1419.2745885\  
RMSD=1.831e-09\Dipole=-2.8622949,3.1735871,0.6785432\Quadrupole=-61.40  
5576,49.5941588,11.8114172,-4.3671549,-29.3625039,34.7545424\PG=C01 [X  
(C37H16Au1Cl5F13P1)]\@\

1\1\GINC-COMPUTE021\SP\RB3LYP\Gen\C72H30Au2Cl4F26P2\CRAT\18-Sep-2020\0  
\#p b3lyp/gen pseudo=read counterpoise=2 empiricaldispersion=gd3bj no  
symm gfprint\CrystalExplorer Job symop = -x, -y, -z, r = 13.3504\0,1  
\H,0,-1.405725,4.438617,6.731711\C,0,-0.463708,4.612436,7.23702\C,0,-0  
.261154,4.110392,8.505737\C,0,0.531718,5.337443,6.609924\C,0,0.94661,4  
.304536,9.135254\H,0,-1.051578,3.562845,9.004024\C,0,1.747952,5.546754  
,7.263653\H,0,0.369066,5.742112,5.618678\C,0,1.954344,5.003757,8.50089  
5\H,0,1.107261,3.908209,10.130132\P,0,3.056298,6.529002,6.48281\H,0,2.  
915588,5.121306,8.985622\Au,0,4.852028,5.148152,5.961279\C,0,3.287514,  
7.947769,7.590517\C,0,2.40037,7.22883,4.944126\Cl,0,3.273652,3.639745,  
5.134192\Cl,0,6.543721,3.741215,5.203681\C,0,6.323387,6.343048,6.71645  
7\C,0,4.33689,8.850236,7.355659\C,0,2.332058,8.243536,8.554162\C,0,2.5  
56391,6.596345,3.723832\C,0,1.68806,8.410378,4.994972\C,0,7.147326,7.0  
72605,5.852083\C,0,6.589951,6.344565,8.098973\H,0,5.087709,8.634402,6.  
605566\C,0,4.398926,10.025717,8.098973\C,0,2.424787,9.425084,9.275684\  
H,0,1.516869,7.555083,8.739385\H,0,3.125113,5.67674,3.662576\C,0,1.994  
636,7.128725,2.590703\C,0,1.123485,8.936691,3.859421\H,0,1.573592,8.92  
6831,5.939973\C,0,8.193188,7.818846,6.387172\C,0,7.012127,7.087772,4.3  
63034\C,0,7.659499,7.105973,8.559004\C,0,5.832413,5.564955,9.10862\H,0  
,5.209247,10.724635,7.932393\C,0,3.44746,10.304799,9.038404\H,0,1.6842  
52,9.652444,10.032557\H,0,2.115167,6.625315,1.639406\C,0,1.281747,8.29  
6622,2.663339\H,0,0.553853,9.856145,3.913656\F,0,8.993299,8.512303,5.5  
64926\C,0,8.456908,7.846147,7.733369\C,0,6.067505,7.864348,3.704463\C,  
0,7.956422,6.452254,3.576138\F,0,7.949246,7.10749,9.870577\C,0,5.11492  
5,6.177722,10.113425\C,0,5.906926,4.171062,9.178836\H,0,3.501013,11.22



9712,9.599159\H,0,0.841147,8.715852,1.767247\F,0,9.500862,8.527168,8.2  
07443\F,0,5.183177,8.577221,4.408311\C,0,6.02985,7.965971,2.343739\F,0  
,8.933347,5.742415,4.131566\C,0,7.936265,6.531125,2.20815\F,0,5.070955  
,7.519742,10.158945\C,0,4.450375,5.480017,11.084334\F,0,6.679865,3.499  
9,8.31543\C,0,5.262105,3.46274,10.149744\F,0,5.118653,8.751648,1.76022  
5\C,0,6.970908,7.29405,1.600425\F,0,8.861542,5.910774,1.466532\F,0,3.7  
1672,6.112502,12.00028\C,0,4.512689,4.105842,11.101282\F,0,5.377394,2.  
116017,10.192115\F,0,6.956409,7.40629,0.262702\F,0,3.869386,3.40662,12  
.034177\F,0,5.265347,6.415853,-1.760226\C,0,4.354149,7.201529,-2.34373  
9\C,0,3.413091,7.873449,-1.600425\C,0,4.316494,7.303151,-3.704463\F,0,  
3.427591,7.761209,-0.262702\C,0,2.447733,8.636374,-2.20815\F,0,5.20082  
1,6.590279,-4.408311\C,0,3.371872,8.079727,-4.363034\F,0,1.522457,9.25  
6725,-1.466532\C,0,2.427577,8.715245,-3.576138\C,0,3.236673,8.094894,-  
5.852083\F,0,1.450653,9.425084,-4.131566\C,0,4.060612,8.824451,-6.7164  
58\C,0,2.190812,7.348654,-6.387173\Au,0,5.531971,10.019347,-5.961279\C  
,0,3.794049,8.822935,-8.098973\F,0,1.390699,6.655196,-5.564926\C,0,1.9  
27091,7.321352,-7.733369\P,0,7.327701,8.638498,-6.48281\C,0,7.110347,  
11.527755,-5.134192\C,0,3.840277,11.426285,-5.203681\C,0,2.724501,8.0  
61526,-8.559004\C,0,4.551586,9.602544,-9.108621\F,0,0.883137,6.640332,  
-8.207443\C,0,7.983629,7.93867,-4.944127\C,0,7.096485,7.21973,-7.59051  
7\C,0,8.636047,9.620746,-7.263653\F,0,2.434753,8.06001,-9.870578\C,0,5  
.269074,8.989778,-10.113425\C,0,4.477073,10.996438,-9.178836\C,0,7.827  
608,8.571155,-3.723833\C,0,8.69594,6.757121,-4.994972\C,0,6.047109,6.3  
17264,-7.355659\C,0,8.051941,6.923964,-8.554161\C,0,8.429656,10.163741  
, -8.500896\C,0,9.852282,9.830057,-6.609924\F,0,5.313043,7.647757,-10.1  
58944\C,0,5.933625,9.687483,-11.084333\F,0,3.704134,11.667599,-8.31543  
\C,0,5.121894,11.704761,-10.149744\C,0,8.389362,8.038774,-2.590703\H,0  
,7.258886,9.490759,-3.662575\C,0,9.260513,6.230809,-3.859421\H,0,8.810  
407,6.240668,-5.939972\H,0,5.296289,6.533097,-6.605566\C,0,5.985073,5.  
141783,-8.098973\C,0,7.959212,5.742416,-9.275683\H,0,8.86713,7.612417,  
-8.739385\H,0,7.468411,10.046194,-8.985622\C,0,9.437389,10.862964,-9.1  
35254\C,0,10.847708,10.555063,-7.23702\H,0,10.014934,9.425388,-5.61867  
8\F,0,6.667279,9.054997,-12.000281\C,0,5.87131,11.061658,-11.101283\F,  
0,5.006605,13.051482,-10.192115\H,0,8.268831,8.542184,-1.639406\C,0,9.  
102253,6.870878,-2.66334\H,0,9.830146,5.311355,-3.913656\H,0,5.174753,  
4.442864,-7.932394\C,0,6.93654,4.862701,-9.038405\H,0,8.699747,5.51505  
5,-10.032557\H,0,9.276738,11.259291,-10.130132\C,0,10.645153,11.057107  
, -8.505737\H,0,11.789724,10.728883,-6.73171\F,0,6.514613,11.76088,-12.  
034178\H,0,9.542852,6.451648,-1.767247\H,0,6.882986,3.937787,-9.599159  
\H,0,11.435577,11.604654,-9.004024\\Version=ES64L-G09RevE.01\HF=-4076.  
0766162\RMSD=5.133e-09\Dipole=0.0000023,0.0000086,0.0000011\Quadrupole  
=16.2822426,-59.0961808,42.8139381,8.5871581,-71.6478173,59.6795501\PG  
=C01 [X(C72H30Au2Cl4F26P2)]\@

1\1\GINC-COMPUTE008\SP\RB3LYP\Gen\C72H30Au2Cl4F26P2\CRAT\18-Sep-2020\0  
\#p b3lyp/gen pseudo=read counterpoise=2 empiricaldispersion=gd3bj no  
symm gfprint\CrystalExplorer Job symop = x+1/2, -y+1/2, z+1/2, r = 13  
.6278\0,1\H,0,-1.405725,4.438617,6.731711\C,0,-0.463708,4.612436,7.23  
702\C,0,-0.261154,4.110392,8.505737\C,0,0.531718,5.337443,6.609924\C,0  
,0.94661,4.304536,9.135254\H,0,-1.051578,3.562845,9.004024\C,0,1.74795  
2,5.546754,7.263653\H,0,0.369066,5.742112,5.618678\C,0,1.954344,5.0037  
57,8.500895\H,0,1.107261,3.908209,10.130132\P,0,3.056298,6.529002,6.48  
281\H,0,2.915588,5.121306,8.985622\Au,0,4.852028,5.148152,5.961279\C,0

,3.287514,7.947769,7.590517\C,0,2.40037,7.22883,4.944126\Cl,0,3.273652  
,3.639745,5.134192\Cl,0,6.543721,3.741215,5.203681\C,0,6.323387,6.3430  
48,6.716457\C,0,4.33689,8.850236,7.355659\C,0,2.332058,8.243536,8.5541  
62\C,0,2.556391,6.596345,3.723832\C,0,1.68806,8.410378,4.994972\C,0,7.  
147326,7.072605,5.852083\C,0,6.589951,6.344565,8.098973\H,0,5.087709,8  
.634402,6.605566\C,0,4.398926,10.025717,8.098973\C,0,2.424787,9.425084  
,9.275684\H,0,1.516869,7.555083,8.739385\H,0,3.125113,5.67674,3.662576  
\C,0,1.994636,7.128725,2.590703\C,0,1.123485,8.936691,3.859421\H,0,1.5  
73592,8.926831,5.939973\C,0,8.193188,7.818846,6.387172\C,0,7.012127,7.  
087772,4.363034\C,0,7.659499,7.105973,8.559004\C,0,5.832413,5.564955,9  
.10862\H,0,5.209247,10.724635,7.932393\C,0,3.44746,10.304799,9.038404\  
H,0,1.684252,9.652444,10.032557\H,0,2.115167,6.625315,1.639406\C,0,1.2  
81747,8.296622,2.663339\H,0,0.553853,9.856145,3.913656\F,0,8.993299,8.  
512303,5.564926\C,0,8.456908,7.846147,7.733369\C,0,6.067505,7.864348,3  
.704463\C,0,7.956422,6.452254,3.576138\F,0,7.949246,7.10749,9.870577\C  
,0,5.114925,6.177722,10.113425\C,0,5.906926,4.171062,9.178836\H,0,3.50  
1013,11.229712,9.599159\H,0,0.841147,8.715852,1.767247\F,0,9.500862,8.  
527168,8.207443\F,0,5.183177,8.577221,4.408311\C,0,6.02985,7.965971,2.  
343739\F,0,8.933347,5.742415,4.131566\C,0,7.936265,6.531125,2.20815\F,  
0,5.070955,7.519742,10.158945\C,0,4.450375,5.480017,11.084334\F,0,6.67  
9865,3.4999,8.31543\C,0,5.262105,3.46274,10.149744\F,0,5.118653,8.7516  
48,1.760225\C,0,6.970908,7.29405,1.600425\F,0,8.861542,5.910774,1.4665  
32\F,0,3.71672,6.112502,12.00028\C,0,4.512689,4.105842,11.101282\F,0,5  
.377394,2.116017,10.192115\F,0,6.956409,7.40629,0.262702\F,0,3.869386,  
3.40662,12.034177\F,0,0.153103,4.17713,-0.07191\C,0,0.796406,3.477908,  
-1.004805\C,0,1.545821,4.12101,-1.956344\C,0,0.734091,2.103732,-1.0217  
55\F,0,1.661111,5.467732,-1.913973\C,0,2.190642,3.412688,-2.927251\F,0  
,0.000437,1.471248,-0.105807\C,0,1.398642,1.406027,-1.992662\F,0,2.963  
582,4.083849,-3.790658\C,0,2.11613,2.018794,-2.997467\F,0,1.354673,0.0  
64007,-1.947144\C,0,2.873667,1.239185,-4.007115\C,0,2.607104,1.240702,  
-5.38963\C,0,3.943215,0.477776,-3.547083\Au,0,1.135744,2.435597,-6.144  
808\C,0,3.431043,0.511145,-6.254005\F,0,4.232963,0.47626,-2.23551\C,0,  
4.740625,-0.262398,-4.372718\Cl,0,-0.442632,3.944005,-6.971895\Cl,0,2.  
827438,3.842535,-6.902407\P,0,-0.659985,1.054748,-5.623277\C,0,4.47690  
4,-0.235096,-5.718915\C,0,3.295844,0.495978,-7.743054\F,0,5.784579,-0.  
943418,-3.898644\C,0,-0.428769,-0.36402,-4.515571\C,0,-1.968331,2.0369  
95,-4.842435\C,0,-1.315913,0.35492,-7.161961\F,0,5.277017,-0.928554,-6  
.541162\C,0,2.351223,-0.280598,-8.401625\C,0,4.240139,1.131496,-8.5299  
49\C,0,0.620607,-1.266486,-4.750429\C,0,-1.384225,-0.659786,-3.551927\  
C,0,-1.76194,2.579992,-3.605192\C,0,-3.184566,2.246307,-5.496164\C,0,-  
1.159892,0.987405,-8.382255\C,0,-2.028224,-0.826628,-7.111115\F,0,1.46  
6895,-0.993471,-7.697776\C,0,2.313566,-0.382221,-9.762348\F,0,5.217063  
,1.841335,-7.974522\C,0,4.219983,1.052625,-9.897938\H,0,1.371427,-1.05  
0653,-5.500522\C,0,0.682643,-2.441967,-4.007115\C,0,-1.291496,-1.84133  
4,-2.830404\H,0,-2.199414,0.028667,-3.366703\H,0,-0.800696,2.462444,-3  
.120466\C,0,-2.769674,3.279213,-2.970833\C,0,-4.179992,2.971313,-4.869  
068\H,0,-3.347217,1.841638,-6.48741\H,0,-0.59117,1.90701,-8.443513\C,0  
,-1.721647,0.455025,-9.515385\C,0,-2.592798,-1.352941,-8.246667\H,0,-2  
.14269,-1.343081,-6.166115\F,0,1.40237,-1.167897,-10.345862\C,0,3.2546  
25,0.2897,-10.505663\F,0,5.145258,1.672976,-10.639556\H,0,1.492964,-3.  
140886,-4.173694\C,0,-0.268823,-2.72105,-3.067682\H,0,-2.032031,-2.068  
695,-2.073531\H,0,-2.609022,3.67554,-1.975956\C,0,-3.977437,3.473358,-  
3.60035\H,0,-5.122009,3.145133,-5.374377\H,0,-1.601116,0.958435,-10.46

6681\C,0,-2.434536,-0.712872,-9.442748\H,0,-3.162429,-2.272395,-8.1924  
32\F,0,3.240125,0.17746,-11.843386\H,0,-0.21527,-3.645963,-2.506929\H,  
0,-4.767861,4.020905,-3.102064\H,0,-2.875136,-1.132101,-10.338841\\Ver  
sion=ES64L-G09RevE.01\HF=-4076.0766205\RMSD=5.133e-09\Dipole=-5.869451  
1,-0.0578685,2.2503829\Quadrupole=-45.2495427,42.7375845,2.5119582,-20  
.6022764,11.5407854,86.6704548\PG=C01 [X(C72H30Au2Cl4F26P2)]\\@  
1\1\GINC-COMPUTE040\SP\RB3LYP\Gen\C37H16Au1Cl5F13P1\CRAT\18-Sep-2020\0  
\\#p b3lyp/gen pseudo=read counterpoise=2 empiricaldispersion=gd3bj no  
symm gfprint\\CrystalExplorer Job symop = -, r = 9.39289\\0,1\H,0,-1.4  
05725,4.438617,6.731711\C,0,-0.463708,4.612436,7.23702\C,0,-0.261154,4  
.110392,8.505737\C,0,0.531718,5.337443,6.609924\C,0,0.94661,4.304536,9  
.135254\H,0,-1.051578,3.562845,9.004024\C,0,1.747952,5.546754,7.263653  
\H,0,0.369066,5.742112,5.618678\C,0,1.954344,5.003757,8.500895\H,0,1.1  
07261,3.908209,10.130132\P,0,3.056298,6.529002,6.48281\H,0,2.915588,5.  
121306,8.985622\Au,0,4.852028,5.148152,5.961279\C,0,3.287514,7.947769,  
7.590517\C,0,2.40037,7.22883,4.944126\Cl,0,3.273652,3.639745,5.134192\  
Cl,0,6.543721,3.741215,5.203681\C,0,6.323387,6.343048,6.716457\C,0,4.3  
3689,8.850236,7.355659\C,0,2.332058,8.243536,8.554162\C,0,2.556391,6.5  
96345,3.723832\C,0,1.68806,8.410378,4.994972\C,0,7.147326,7.072605,5.8  
52083\C,0,6.589951,6.344565,8.098973\H,0,5.087709,8.634402,6.605566\C,  
0,4.398926,10.025717,8.098973\C,0,2.424787,9.425084,9.275684\H,0,1.516  
869,7.555083,8.739385\H,0,3.125113,5.67674,3.662576\C,0,1.994636,7.128  
725,2.590703\C,0,1.123485,8.936691,3.859421\H,0,1.573592,8.926831,5.93  
9973\C,0,8.193188,7.818846,6.387172\C,0,7.012127,7.087772,4.363034\C,0  
,7.659499,7.105973,8.559004\C,0,5.832413,5.564955,9.10862\H,0,5.209247  
,10.724635,7.932393\C,0,3.44746,10.304799,9.038404\H,0,1.684252,9.6524  
44,10.032557\H,0,2.115167,6.625315,1.639406\C,0,1.281747,8.296622,2.66  
3339\H,0,0.553853,9.856145,3.913656\F,0,8.993299,8.512303,5.564926\C,0  
,8.456908,7.846147,7.733369\C,0,6.067505,7.864348,3.704463\C,0,7.95642  
2,6.452254,3.576138\F,0,7.949246,7.10749,9.870577\C,0,5.114925,6.17772  
2,10.113425\C,0,5.906926,4.171062,9.178836\H,0,3.501013,11.229712,9.59  
9159\H,0,0.841147,8.715852,1.767247\F,0,9.500862,8.527168,8.207443\F,0  
,5.183177,8.577221,4.408311\C,0,6.02985,7.965971,2.343739\F,0,8.933347  
,5.742415,4.131566\C,0,7.936265,6.531125,2.20815\F,0,5.070955,7.519742  
,10.158945\C,0,4.450375,5.480017,11.084334\F,0,6.679865,3.4999,8.31543  
\C,0,5.262105,3.46274,10.149744\F,0,5.118653,8.751648,1.760225\C,0,6.9  
70908,7.29405,1.600425\F,0,8.861542,5.910774,1.466532\F,0,3.71672,6.11  
2502,12.00028\C,0,4.512689,4.105842,11.101282\F,0,5.377394,2.116017,10  
.192115\F,0,6.956409,7.40629,0.262702\F,0,3.869386,3.40662,12.034177\C  
l,0,0.227324,4.473047,13.511121\C,0,-1.50723,4.436493,13.633876\Cl,0,-  
2.121541,2.851186,13.27263\Cl,0,-2.226881,5.620923,12.594932\H,0,-1.77  
7039,4.677656,14.654661\\Version=ES64L-G09RevE.01\HF=-1419.2745886\RMS  
D=1.831e-09\Dipole=-3.1797887,3.1321522,1.6956586\Quadrupole=-70.17556  
07,39.9299944,30.2455663,-10.797946,-29.498647,52.4652393\PG=C01 [X(C3  
7H16Au1Cl5F13P1)]\\@

1\1\GINC-COMPUTE041\SP\RB3LYP\Gen\C37H16Au1Cl5F13P1\CRAT\18-Sep-2020\0  
\\#p b3lyp/gen pseudo=read counterpoise=2 empiricaldispersion=gd3bj no  
symm gfprint\\CrystalExplorer Job symop = -, r = 7.45168\\0,1\H,0,-1.4  
05725,4.438617,6.731711\C,0,-0.463708,4.612436,7.23702\C,0,-0.261154,4  
.110392,8.505737\C,0,0.531718,5.337443,6.609924\C,0,0.94661,4.304536,9  
.135254\H,0,-1.051578,3.562845,9.004024\C,0,1.747952,5.546754,7.263653  
\H,0,0.369066,5.742112,5.618678\C,0,1.954344,5.003757,8.500895\H,0,1.1

07261,3.908209,10.130132\P,0,3.056298,6.529002,6.48281\H,0,2.915588,5.121306,8.985622\Au,0,4.852028,5.148152,5.961279\C,0,3.287514,7.947769,7.590517\C,0,2.40037,7.22883,4.944126\Cl,0,3.273652,3.639745,5.134192\Cl,0,6.543721,3.741215,5.203681\C,0,6.323387,6.343048,6.716457\C,0,4.33689,8.850236,7.355659\C,0,2.332058,8.243536,8.554162\C,0,2.556391,6.596345,3.723832\C,0,1.68806,8.410378,4.994972\C,0,7.147326,7.072605,5.852083\C,0,6.589951,6.344565,8.098973\H,0,5.087709,8.634402,6.605566\C,0,4.398926,10.025717,8.098973\C,0,2.424787,9.425084,9.275684\H,0,1.516869,7.555083,8.739385\H,0,3.125113,5.67674,3.662576\C,0,1.994636,7.128725,2.590703\C,0,1.123485,8.936691,3.859421\H,0,1.573592,8.926831,5.939973\C,0,8.193188,7.818846,6.387172\C,0,7.012127,7.087772,4.363034\C,0,7.659499,7.105973,8.559004\C,0,5.832413,5.564955,9.10862\H,0,5.209247,10.724635,7.932393\C,0,3.44746,10.304799,9.038404\H,0,1.684252,9.652444,10.032557\H,0,2.115167,6.625315,1.639406\C,0,1.281747,8.296622,2.663339\H,0,0.553853,9.856145,3.913656\F,0,8.993299,8.512303,5.564926\C,0,8.456908,7.846147,7.733369\C,0,6.067505,7.864348,3.704463\C,0,7.956422,6.452254,3.576138\F,0,7.949246,7.10749,9.870577\C,0,5.114925,6.177722,10.113425\C,0,5.906926,4.171062,9.178836\H,0,3.501013,11.229712,9.599159\H,0,0.841147,8.715852,1.767247\F,0,9.500862,8.527168,8.207443\F,0,5.183177,8.577221,4.408311\C,0,6.02985,7.965971,2.343739\F,0,8.933347,5.742415,4.131566\C,0,7.936265,6.531125,2.20815\F,0,5.070955,7.519742,10.158945\C,0,4.450375,5.480017,11.084334\F,0,6.679865,3.4999,8.31543\C,0,5.262105,3.46274,10.149744\F,0,5.118653,8.751648,1.760225\C,0,6.970908,7.29405,1.600425\F,0,8.861542,5.910774,1.466532\F,0,3.71672,6.112502,12.00028\C,0,4.512689,4.105842,11.101282\F,0,5.377394,2.116017,10.192115\F,0,6.956409,7.40629,0.262702\F,0,3.869386,3.40662,12.034177\C,0,7.205243,10.694451,10.701055\C,0,8.939796,10.731005,10.5783\H,0,9.209605,10.489842,9.557514\Cl,0,9.659447,9.546576,11.617244\Cl,0,9.554107,12.316313,10.939545\Version=ES64L-G09RevE.01\HF=-1419.2745883\RMSD=1.831e-09\Dipole=-2.9480838,2.8205846,0.6752416\Quadrupole=-49.9640879,47.4788367,2.4852512,-10.9358447,-30.7741248,31.420617\PG=C01 [X(C37H16Au1Cl5F13P1)]\@\

1\1\GINC-COMPUTE040\SP\RB3LYP\Gen\C37H16Au1Cl5F13P1\CRAT\18-Sep-2020\0  
\\#p b3lyp/gen pseudo=read counterpoise=2 empiricaldispersion=gd3bj no  
symm gfprint\CrystalExplorer Job symop = -, r = 6.26888\0,1\H,0,-1.4  
05725,4.438617,6.731711\C,0,-0.463708,4.612436,7.23702\C,0,-0.261154,4  
.110392,8.505737\C,0,0.531718,5.337443,6.609924\C,0,0.94661,4.304536,9  
.135254\H,0,-1.051578,3.562845,9.004024\C,0,1.747952,5.546754,7.263653  
\H,0,0.369066,5.742112,5.618678\C,0,1.954344,5.003757,8.500895\H,0,1.1  
07261,3.908209,10.130132\P,0,3.056298,6.529002,6.48281\H,0,2.915588,5.121306,8.985622\Au,0,4.852028,5.148152,5.961279\C,0,3.287514,7.947769,7.590517\C,0,2.40037,7.22883,4.944126\Cl,0,3.273652,3.639745,5.134192\Cl,0,6.543721,3.741215,5.203681\C,0,6.323387,6.343048,6.716457\C,0,4.33689,8.850236,7.355659\C,0,2.332058,8.243536,8.554162\C,0,2.556391,6.596345,3.723832\C,0,1.68806,8.410378,4.994972\C,0,7.147326,7.072605,5.852083\C,0,6.589951,6.344565,8.098973\H,0,5.087709,8.634402,6.605566\C,0,4.398926,10.025717,8.098973\C,0,2.424787,9.425084,9.275684\H,0,1.516869,7.555083,8.739385\H,0,3.125113,5.67674,3.662576\C,0,1.994636,7.128725,2.590703\C,0,1.123485,8.936691,3.859421\H,0,1.573592,8.926831,5.939973\C,0,8.193188,7.818846,6.387172\C,0,7.012127,7.087772,4.363034\C,0,7.659499,7.105973,8.559004\C,0,5.832413,5.564955,9.10862\H,0,5.209247,10.724635,7.932393\C,0,3.44746,10.304799,9.038404\H,0,1.684252,9.6524

44,10.032557\H,0,2.115167,6.625315,1.639406\C,0,1.281747,8.296622,2.66  
3339\H,0,0.553853,9.856145,3.913656\F,0,8.993299,8.512303,5.564926\C,0  
,8.456908,7.846147,7.733369\C,0,6.067505,7.864348,3.704463\C,0,7.95642  
2,6.452254,3.576138\F,0,7.949246,7.10749,9.870577\C,0,5.114925,6.17772  
2,10.113425\C,0,5.906926,4.171062,9.178836\H,0,3.501013,11.229712,9.59  
9159\H,0,0.841147,8.715852,1.767247\F,0,9.500862,8.527168,8.207443\F,0  
,5.183177,8.577221,4.408311\C,0,6.02985,7.965971,2.343739\F,0,8.933347  
,5.742415,4.131566\C,0,7.936265,6.531125,2.20815\F,0,5.070955,7.519742  
,10.158945\C,0,4.450375,5.480017,11.084334\F,0,6.679865,3.4999,8.31543  
\C,0,5.262105,3.46274,10.149744\F,0,5.118653,8.751648,1.760225\C,0,6.9  
70908,7.29405,1.600425\F,0,8.861542,5.910774,1.466532\F,0,3.71672,6.11  
2502,12.00028\C,0,4.512689,4.105842,11.101282\F,0,5.377394,2.116017,10  
.192115\F,0,6.956409,7.40629,0.262702\F,0,3.869386,3.40662,12.034177\C  
l,0,6.89504,3.110703,1.405033\C,0,5.160486,3.147256,1.527788\Cl,0,4.54  
6175,4.732563,1.166543\H,0,4.890677,2.906093,2.548573\Cl,0,4.440836,1.  
962826,0.488844\\Version=ES64L-G09RevE.01\HF=-1419.274588\RMSD=1.831e-  
09\Dipole=-3.0708034,3.0051807,1.7534401\Quadrupole=-63.0690684,46.958  
9356,16.1101327,-9.6433657,-18.8937217,49.610557\PG=C01 [X(C37H16Au1Cl  
5F13P1)]\@

1\1\GINC-COMPUTE040\SP\RB3LYP\Gen\C37H16Au1Cl5F13P1\CRAT\18-Sep-2020\0  
\#p b3lyp/gen pseudo=read counterpoise=2 empiricaldispersion=gd3bj no  
symm gfpint\CystalExplorer Job symop = -, r = 8.02456\0,1\H,0,-1.4  
05725,4.438617,6.731711\C,0,-0.463708,4.612436,7.23702\C,0,-0.261154,4  
.110392,8.505737\C,0,0.531718,5.337443,6.609924\C,0,0.94661,4.304536,9  
.135254\H,0,-1.051578,3.562845,9.004024\C,0,1.747952,5.546754,7.263653  
\H,0,0.369066,5.742112,5.618678\C,0,1.954344,5.003757,8.500895\H,0,1.1  
07261,3.908209,10.130132\P,0,3.056298,6.529002,6.48281\H,0,2.915588,5.  
121306,8.985622\Au,0,4.852028,5.148152,5.961279\C,0,3.287514,7.947769,  
7.590517\C,0,2.40037,7.22883,4.944126\Cl,0,3.273652,3.639745,5.134192\  
Cl,0,6.543721,3.741215,5.203681\C,0,6.323387,6.343048,6.716457\C,0,4.3  
3689,8.850236,7.355659\C,0,2.332058,8.243536,8.554162\C,0,2.556391,6.5  
96345,3.723832\C,0,1.68806,8.410378,4.994972\C,0,7.147326,7.072605,5.8  
52083\C,0,6.589951,6.344565,8.098973\H,0,5.087709,8.634402,6.605566\C,  
0,4.398926,10.025717,8.098973\C,0,2.424787,9.425084,9.275684\H,0,1.516  
869,7.555083,8.739385\H,0,3.125113,5.67674,3.662576\C,0,1.994636,7.128  
725,2.590703\C,0,1.123485,8.936691,3.859421\H,0,1.573592,8.926831,5.93  
9973\C,0,8.193188,7.818846,6.387172\C,0,7.012127,7.087772,4.363034\C,0  
,7.659499,7.105973,8.559004\C,0,5.832413,5.564955,9.10862\H,0,5.209247  
,10.724635,7.932393\C,0,3.44746,10.304799,9.038404\H,0,1.684252,9.6524  
44,10.032557\H,0,2.115167,6.625315,1.639406\C,0,1.281747,8.296622,2.66  
3339\H,0,0.553853,9.856145,3.913656\F,0,8.993299,8.512303,5.564926\C,0  
,8.456908,7.846147,7.733369\C,0,6.067505,7.864348,3.704463\C,0,7.95642  
2,6.452254,3.576138\F,0,7.949246,7.10749,9.870577\C,0,5.114925,6.17772  
2,10.113425\C,0,5.906926,4.171062,9.178836\H,0,3.501013,11.229712,9.59  
9159\H,0,0.841147,8.715852,1.767247\F,0,9.500862,8.527168,8.207443\F,0  
,5.183177,8.577221,4.408311\C,0,6.02985,7.965971,2.343739\F,0,8.933347  
,5.742415,4.131566\C,0,7.936265,6.531125,2.20815\F,0,5.070955,7.519742  
,10.158945\C,0,4.450375,5.480017,11.084334\F,0,6.679865,3.4999,8.31543  
\C,0,5.262105,3.46274,10.149744\F,0,5.118653,8.751648,1.760225\C,0,6.9  
70908,7.29405,1.600425\F,0,8.861542,5.910774,1.466532\F,0,3.71672,6.11  
2502,12.00028\C,0,4.512689,4.105842,11.101282\F,0,5.377394,2.116017,10  
.192115\F,0,6.956409,7.40629,0.262702\F,0,3.869386,3.40662,12.034177\C

l,0,8.157119,5.620923,12.594932\C,0,8.876769,4.436493,13.633876\Cl,0,1  
0.611323,4.473047,13.511121\Cl,0,8.262459,2.851186,13.27263\H,0,8.6069  
61,4.677656,14.654661\\Version=ES64L-G09RevE.01\HF=-1419.2745885\RMSE=  
1.831e-09\Dipole=-3.0630852,3.1479125,1.6135089\Quadrupole=-70.9845254  
,42.1783594,28.806166,-7.572384,-18.6855593,52.0267813\PG=C01 [X(C37H1  
6Au1Cl5F13P1)]\@

1\1\GINC-COMPUTE041\SP\RB3LYP\Gen\C72H30Au2Cl4F26P2\CRAT\18-Sep-2020\0  
\#p b3lyp/gen pseudo=read counterpoise=2 empiricaldispersion=gd3bj no  
symm gfprint\CrystalExplorer Job symop = x+1/2, -y+1/2, z+1/2, r = 14  
.7093\0,1\H,0,-1.405725,4.438617,6.731711\C,0,-0.463708,4.612436,7.23  
702\C,0,-0.261154,4.110392,8.505737\C,0,0.531718,5.337443,6.609924\C,0  
,0.94661,4.304536,9.135254\H,0,-1.051578,3.562845,9.004024\C,0,1.74795  
2,5.546754,7.263653\H,0,0.369066,5.742112,5.618678\C,0,1.954344,5.0037  
57,8.500895\H,0,1.107261,3.908209,10.130132\P,0,3.056298,6.529002,6.48  
281\H,0,2.915588,5.121306,8.985622\Au,0,4.852028,5.148152,5.961279\C,0  
,3.287514,7.947769,7.590517\C,0,2.40037,7.22883,4.944126\Cl,0,3.273652  
,3.639745,5.134192\Cl,0,6.543721,3.741215,5.203681\C,0,6.323387,6.3430  
48,6.716457\C,0,4.33689,8.850236,7.355659\C,0,2.332058,8.243536,8.5541  
62\C,0,2.556391,6.596345,3.723832\C,0,1.68806,8.410378,4.994972\C,0,7.  
147326,7.072605,5.852083\C,0,6.589951,6.344565,8.098973\H,0,5.087709,8.  
634402,6.605566\C,0,4.398926,10.025717,8.098973\C,0,2.424787,9.425084  
,9.275684\H,0,1.516869,7.555083,8.739385\H,0,3.125113,5.67674,3.662576  
\C,0,1.994636,7.128725,2.590703\C,0,1.123485,8.936691,3.859421\H,0,1.5  
73592,8.926831,5.939973\C,0,8.193188,7.818846,6.387172\C,0,7.012127,7.  
087772,4.363034\C,0,7.659499,7.105973,8.559004\C,0,5.832413,5.564955,9.  
10862\H,0,5.209247,10.724635,7.932393\C,0,3.44746,10.304799,9.038404\  
H,0,1.684252,9.652444,10.032557\H,0,2.115167,6.625315,1.639406\C,0,1.2  
81747,8.296622,2.663339\H,0,0.553853,9.856145,3.913656\F,0,8.993299,8.  
512303,5.564926\C,0,8.456908,7.846147,7.733369\C,0,6.067505,7.864348,3.  
704463\C,0,7.956422,6.452254,3.576138\F,0,7.949246,7.10749,9.870577\C  
,0,5.114925,6.177722,10.113425\C,0,5.906926,4.171062,9.178836\H,0,3.50  
1013,11.229712,9.599159\H,0,0.841147,8.715852,1.767247\F,0,9.500862,8.  
527168,8.207443\F,0,5.183177,8.577221,4.408311\C,0,6.02985,7.965971,2.  
343739\F,0,8.933347,5.742415,4.131566\C,0,7.936265,6.531125,2.20815\F,  
0,5.070955,7.519742,10.158945\C,0,4.450375,5.480017,11.084334\F,0,6.67  
9865,3.4999,8.31543\C,0,5.262105,3.46274,10.149744\F,0,5.118653,8.7516  
48,1.760225\C,0,6.970908,7.29405,1.600425\F,0,8.861542,5.910774,1.4665  
32\F,0,3.71672,6.112502,12.00028\C,0,4.512689,4.105842,11.101282\F,0,5  
.377394,2.116017,10.192115\F,0,6.956409,7.40629,0.262702\F,0,3.869386,  
3.40662,12.034177\F,0,2.193825,1.672974,13.572619\C,0,1.26855,1.052624  
,14.314238\C,0,0.303192,0.289699,13.706512\C,0,1.288706,1.131495,15.68  
2226\F,0,0.288692,0.177459,12.36879\C,0,-0.637866,-0.382222,14.449827\  
F,0,2.26563,1.841334,16.237654\C,0,0.344411,0.495976,16.469122\F,0,-1.  
549063,-1.167899,13.866313\C,0,-0.60021,-0.280599,15.810551\C,0,0.4796  
1,0.511144,17.95817\F,0,-1.484538,-0.993472,16.514399\C,0,-0.344329,1.  
2407,18.822546\C,0,1.525471,-0.235097,18.493259\Au,0,-1.815689,2.43559  
6,18.067368\C,0,-0.077766,1.239184,20.205061\F,0,2.325584,-0.928555,17.  
.671013\C,0,1.789193,-0.262399,19.839457\Cl,0,-3.394064,3.944004,17.24  
028\Cl,0,-0.123995,3.842534,17.309769\P,0,-3.611418,1.054747,18.588898  
\C,0,0.991782,0.477775,20.665092\C,0,-0.835303,2.018793,21.214708\F,0,  
2.833146,-0.94342,20.313532\C,0,-3.380202,-0.364021,19.696604\C,0,-4.9  
19764,2.036994,19.369741\C,0,-4.267346,0.354919,17.050215\F,0,1.28153,

0.476258,21.976665\C,0,-1.552791,1.406026,22.219513\C,0,-0.760791,3.41  
2686,21.284924\C,0,-2.330826,-1.266488,19.461746\C,0,-4.335658,-0.6597  
87,20.660248\C,0,-4.713373,2.579991,20.606983\C,0,-6.135999,2.246306,1  
8.716011\C,0,-4.111325,0.987403,15.829921\C,0,-4.979656,-0.826629,17.1  
01061\F,0,-1.59676,0.064006,22.265032\C,0,-2.217342,2.103731,23.19042\  
F,0,0.012149,4.083848,20.421516\C,0,-1.405612,4.121008,22.255831\H,0,-  
1.580006,-1.050654,18.711653\C,0,-2.26879,-2.441969,20.205061\C,0,-4.2  
42929,-1.841336,21.381771\H,0,-5.150847,0.028666,20.845472\H,0,-3.7521  
29,2.462442,21.091709\C,0,-5.721107,3.279212,21.241343\C,0,-7.131424,2  
.971312,19.343107\H,0,-6.29865,1.841637,17.724766\H,0,-3.542603,1.9070  
09,15.768662\C,0,-4.673079,0.455024,14.696791\C,0,-5.54423,-1.352942,1  
5.965508\H,0,-5.094123,-1.343083,18.046061\F,0,-2.950996,1.471246,24.1  
06369\C,0,-2.155027,3.477907,23.207371\F,0,-1.290322,5.467731,22.29820  
3\H,0,-1.458469,-3.140887,20.038481\C,0,-3.220256,-2.721051,21.144493\  
H,0,-4.983464,-2.068696,22.138645\H,0,-5.560455,3.675539,22.236219\C,0  
,-6.92887,3.473356,20.611824\H,0,-8.073442,3.145132,18.837799\H,0,-4.5  
52549,0.958434,13.745494\C,0,-5.38597,-0.712873,14.769427\H,0,-6.11386  
3,-2.272396,16.019743\F,0,-2.79833,4.177128,24.140266\H,0,-3.166703,-3  
.645964,21.705246\H,0,-7.719295,4.020903,21.110111\H,0,-5.826569,-1.13  
2102,13.873334\\Version=ES64L-G09RevE.01\HF=-4076.0766209\RMSD=5.133e-  
09\Dipole=-6.0284508,-0.090926,2.5526634\Quadrupole=-62.9703259,-7.489  
7134,70.4600393,-4.8647043,-130.1325033,-54.0449947\PG=C01 [X(C72H30Au  
2Cl4F26P2)]\@

1\1\GINC-COMPUTE021\SP\RB3LYP\Gen\C72H30Au2Cl4F26P2\CRAT\18-Sep-2020\0  
\#p b3lyp/gen pseudo=read counterpoise=2 empiricaldispersion=gd3bj no  
symm gfprint\CystalExplorer Job symop = -x, -y, -z, r = 11.6683\0,1  
\H,0,-1.405725,4.438617,6.731711\C,0,-0.463708,4.612436,7.23702\C,0,-0  
.261154,4.110392,8.505737\C,0,0.531718,5.337443,6.609924\C,0,0.94661,4  
.304536,9.135254\H,0,-1.051578,3.562845,9.004024\C,0,1.747952,5.546754  
,7.263653\H,0,0.369066,5.742112,5.618678\C,0,1.954344,5.003757,8.50089  
5\H,0,1.107261,3.908209,10.130132\P,0,3.056298,6.529002,6.48281\H,0,2.  
915588,5.121306,8.985622\Au,0,4.852028,5.148152,5.961279\C,0,3.287514,  
7.947769,7.590517\C,0,2.40037,7.22883,4.944126\Cl,0,3.273652,3.639745,  
5.134192\Cl,0,6.543721,3.741215,5.203681\C,0,6.323387,6.343048,6.71645  
7\C,0,4.33689,8.850236,7.355659\C,0,2.332058,8.243536,8.554162\C,0,2.5  
56391,6.596345,3.723832\C,0,1.68806,8.410378,4.994972\C,0,7.147326,7.0  
72605,5.852083\C,0,6.589951,6.344565,8.098973\H,0,5.087709,8.634402,6.  
605566\C,0,4.398926,10.025717,8.098973\C,0,2.424787,9.425084,9.275684\  
H,0,1.516869,7.555083,8.739385\H,0,3.125113,5.67674,3.662576\C,0,1.994  
636,7.128725,2.590703\C,0,1.123485,8.936691,3.859421\H,0,1.573592,8.92  
6831,5.939973\C,0,8.193188,7.818846,6.387172\C,0,7.012127,7.087772,4.3  
63034\C,0,7.659499,7.105973,8.559004\C,0,5.832413,5.564955,9.10862\H,0  
,5.209247,10.724635,7.932393\C,0,3.44746,10.304799,9.038404\H,0,1.6842  
52,9.652444,10.032557\H,0,2.115167,6.625315,1.639406\C,0,1.281747,8.29  
6622,2.663339\H,0,0.553853,9.856145,3.913656\F,0,8.993299,8.512303,5.5  
64926\C,0,8.456908,7.846147,7.733369\C,0,6.067505,7.864348,3.704463\C,  
0,7.956422,6.452254,3.576138\F,0,7.949246,7.10749,9.870577\C,0,5.11492  
5,6.177722,10.113425\C,0,5.906926,4.171062,9.178836\H,0,3.501013,11.22  
9712,9.599159\H,0,0.841147,8.715852,1.767247\F,0,9.500862,8.527168,8.2  
07443\F,0,5.183177,8.577221,4.408311\C,0,6.02985,7.965971,2.343739\F,0  
,8.933347,5.742415,4.131566\C,0,7.936265,6.531125,2.20815\F,0,5.070955  
,7.519742,10.158945\C,0,4.450375,5.480017,11.084334\F,0,6.679865,3.499

9,8.31543\C,0,5.262105,3.46274,10.149744\F,0,5.118653,8.751648,1.76022  
5\C,0,6.970908,7.29405,1.600425\F,0,8.861542,5.910774,1.466532\F,0,3.7  
1672,6.112502,12.00028\C,0,4.512689,4.105842,11.101282\F,0,5.377394,2.  
116017,10.192115\F,0,6.956409,7.40629,0.262702\F,0,3.869386,3.40662,12  
.034177\F,0,2.36161,7.647756,14.053231\C,0,2.317641,8.989777,14.09875\  
C,0,2.982192,9.687482,13.127842\C,0,1.600153,9.602543,15.103555\F,0,3.  
715846,9.054996,12.211894\C,0,2.919877,11.061657,13.110892\C,0,1.52564  
,10.996437,15.03334\C,0,0.842616,8.822934,16.113203\F,0,3.563179,11.76  
0879,12.177998\C,0,2.170462,11.704759,14.062431\F,0,0.752701,11.667598  
,15.896746\C,0,1.109179,8.82445,17.495718\C,0,-0.226932,8.061525,15.65  
3172\F,0,2.055172,13.051481,14.020061\Au,0,2.580539,10.019345,18.25089  
6\C,0,0.28524,8.094893,18.360092\F,0,-0.51668,8.060009,14.341598\C,0,-  
1.024342,7.321351,16.478806\P,0,4.376268,8.638497,17.729364\Cl,0,4.158  
914,11.527753,19.077984\Cl,0,0.888844,11.426283,19.008495\C,0,-0.76062  
1,7.348652,17.825003\C,0,0.420439,8.079726,19.849142\F,0,-2.068296,6.6  
4033,16.004732\C,0,4.145052,7.219729,16.621658\C,0,5.684614,9.620744,1  
6.948523\C,0,5.032197,7.938668,19.268049\F,0,-1.560734,6.655195,18.647  
249\C,0,1.365061,7.30315,20.507713\C,0,-0.523856,8.715244,20.636036\C,  
0,5.100508,6.923963,15.658014\C,0,3.095676,6.317263,16.856516\C,0,5.47  
8223,10.16374,15.71128\C,0,6.900849,9.830056,17.602251\C,0,4.876175,8.  
571154,20.488342\C,0,5.744507,6.75712,19.217203\F,0,2.249388,6.590278,  
19.803864\C,0,1.402717,7.201528,21.868437\F,0,-1.50078,9.425083,20.080  
61\C,0,-0.503699,8.636374,22.004025\C,0,5.007779,5.742414,14.936492\H,  
0,5.915697,7.612416,15.472791\C,0,3.03364,5.141781,16.113203\H,0,2.344  
857,6.533096,17.606609\H,0,4.516979,10.046192,15.226553\C,0,6.485956,1  
0.862963,15.076921\C,0,7.896275,10.555062,16.975157\H,0,7.0635,9.42538  
7,18.593498\H,0,4.307453,9.490758,20.549601\C,0,5.43793,8.038774,21.62  
1473\C,0,6.309081,6.230808,20.352755\H,0,5.858974,6.240667,18.272203\F  
,0,2.313914,6.415851,22.45195\C,0,0.461658,7.873448,22.61175\F,0,-1.42  
8975,9.256724,22.745644\C,0,3.985106,4.8627,15.17377\H,0,5.748314,5.51  
5054,14.179619\H,0,2.22332,4.442863,16.279781\H,0,6.325305,11.25929,14  
.082044\C,0,7.69372,11.057106,15.706438\H,0,8.838291,10.728882,17.4804  
65\H,0,5.317399,8.542183,22.572769\C,0,6.15082,6.870876,21.548836\H,0,  
6.878713,5.311354,20.298519\F,0,0.476158,7.761208,23.949472\H,0,3.9315  
53,3.937786,14.613016\H,0,8.484144,11.604653,15.208152\H,0,6.59142,6.4  
51646,22.444929\Version=ES64L-G09RevE.01\HF=-4076.0766104\RMSD=5.133e  
-09\Dipole=0.0000023,0.0000097,-0.0000016\Quadrupole=27.5101895,-14.76  
82141,-12.7419754,26.2245727,73.6832573,-82.7086156\PG=C01 [X(C72H30Au  
2Cl4F26P2)]\@

### Compound 3c

1\1\GINC-COMPUTE040\SP\RB3LYP\Gen\C43H18Au1Cl5F15P1\CRAT\18-Sep-2020\0  
\#p b3lyp/gen pseudo=read counterpoise=2 empiricaldispersion=gd3bj no  
symm gfprint\CrystalExplorer Job symop = -, r = 8.47953\0,1\F,0,-1.1  
54257,7.48701,6.256066\C,0,-2.444196,7.169269,6.325716\C,0,-2.893473,6  
.272045,7.294133\C,0,-3.289746,7.72075,5.395464\C,0,-1.947517,5.696214  
,8.291173\C,0,-4.225567,5.962825,7.275051\F,0,-2.829366,8.558322,4.465  
211\C,0,-4.604365,7.396922,5.428857\C,0,-1.766835,4.331509,8.439058\C,  
0,-1.180818,6.547177,9.080694\F,0,-4.723805,5.110645,8.185744\C,0,-5.1  
07273,6.517959,6.349569\F,0,-5.470142,7.944752,4.539155\H,0,-2.401281,  
3.656704,7.877806\C,0,-0.797973,3.794635,9.285827\C,0,-0.194529,6.0626  
51,9.920306\H,0,-1.359815,7.61435,9.035135\F,0,-6.391539,6.183174,6.36



9128\C,0,0.051839,4.684555,9.985902\C,0,-0.679418,2.316712,9.366925\C,  
0,0.529038,7.053615,10.755148\Au,0,1.615334,3.994045,11.1127\C,0,-0.57  
1375,1.532706,8.233926\C,0,-0.747661,1.615489,10.559557\C,0,1.836008,7  
.429791,10.509467\C,0,-0.078645,7.698836,11.814205\Cl,0,3.260511,3.081  
604,12.52382\Cl,0,0.443065,4.678102,13.002542\P,0,2.994464,3.494911,9.  
291313\F,0,-0.558617,2.102449,7.021497\C,0,-0.444371,0.164349,8.274475  
\F,0,-0.966629,2.257059,11.712593\C,0,-0.629347,0.226436,10.6335\F,0,2  
.472983,6.895353,9.43419\C,0,2.536792,8.319711,11.279906\F,0,-1.337059  
,7.417618,12.111408\C,0,0.600126,8.610669,12.601341\C,0,2.288103,3.461  
068,7.616143\C,0,3.744577,1.863839,9.548205\C,0,4.368786,4.671164,9.19  
7572\F,0,-0.283371,-0.549047,7.150301\C,0,-0.459539,-0.489395,9.483804  
\F,0,-0.676029,-0.400525,11.812058\F,0,3.813807,8.611887,10.99439\C,0,  
1.914796,8.915019,12.336577\F,0,-0.040857,9.231544,13.605776\C,0,1.581  
765,4.543336,7.117624\C,0,2.588604,2.399495,6.776531\C,0,2.962443,0.82  
2962,10.003791\C,0,5.058256,1.645924,9.297753\C,0,5.151002,4.937774,10  
.31626\C,0,4.693041,5.329777,8.014482\F,0,-0.325143,-1.824883,9.541288  
\F,0,2.558406,9.789112,13.105587\H,0,1.339665,5.372507,7.770947\C,0,1.  
181891,4.574989,5.796188\C,0,2.174417,2.433582,5.45271\H,0,3.140984,1.  
547924,7.154118\C,0,3.519912,-0.399308,10.22085\H,0,1.906356,0.978424,  
10.186979\C,0,5.604357,0.385915,9.512426\H,0,5.682237,2.452452,8.93304  
6\H,0,4.911926,4.463718,11.260109\C,0,6.217889,5.791171,10.242317\C,0,  
5.728672,6.209957,7.959621\H,0,4.108508,5.139254,7.12287\H,0,0.635316,  
5.425951,5.408821\C,0,1.490647,3.501242,4.968502\H,0,2.4011,1.600394,4  
.799148\H,0,2.90582,-1.213018,10.586272\C,0,4.835547,-0.603831,9.98470  
9\H,0,6.650148,0.204036,9.297515\H,0,6.842899,5.952842,11.111745\C,0,6  
.49363,6.437611,9.075924\H,0,5.950183,6.728326,7.034855\H,0,1.181705,3  
.51719,3.930674\H,0,5.270361,-1.576412,10.179585\H,0,7.319936,7.136154  
,9.029411\Cl,0,-3.609944,-2.134224,8.069819\C,0,-5.190539,-1.942971,8.  
784922\Cl,0,-5.350073,-0.375812,9.504317\Cl,0,-6.428793,-2.193512,7.58  
2749\H,0,-5.308545,-2.690211,9.559894\\Version=ES64L-G09RevE.01\HF=-14  
19.274894\RMSD=2.681e-09\Dipole=1.5097908,-0.9134267,-3.5099817\Quadru  
pole=61.5338564,42.2772219,-103.8110784,13.7100057,9.7388325,-46.86341  
23\PG=C01 [X(C43H18Au1Cl5F15P1)]\@

1\1\GINC-COMPUTE041\SP\RB3LYP\Gen\C84H34Au2Cl4F30P2\CRAT\18-Sep-2020\0  
\#p b3lyp/gen pseudo=read counterpoise=2 empiricaldispersion=gd3bj no  
symm gfprint\CrystalExplorer Job symop = -x, -y, -z, r = 11.7368\0,1  
\F,0,-1.154257,7.48701,6.256066\C,0,-2.444196,7.169269,6.325716\C,0,-2  
.893473,6.272045,7.294133\C,0,-3.289746,7.72075,5.395464\C,0,-1.947517  
,5.696214,8.291173\C,0,-4.225567,5.962825,7.275051\F,0,-2.829366,8.558  
322,4.465211\C,0,-4.604365,7.396922,5.428857\C,0,-1.766835,4.331509,8.  
439058\C,0,-1.180818,6.547177,9.080694\F,0,-4.723805,5.110645,8.185744  
\C,0,-5.107273,6.517959,6.349569\F,0,-5.470142,7.944752,4.539155\H,0,-  
2.401281,3.656704,7.877806\C,0,-0.797973,3.794635,9.285827\C,0,-0.1945  
29,6.062651,9.920306\H,0,-1.359815,7.61435,9.035135\F,0,-6.391539,6.18  
3174,6.369128\C,0,0.051839,4.684555,9.985902\C,0,-0.679418,2.316712,9.  
366925\C,0,0.529038,7.053615,10.755148\Au,0,1.615334,3.994045,11.1127\  
C,0,-0.571375,1.532706,8.233926\C,0,-0.747661,1.615489,10.559557\C,0,1  
.836008,7.429791,10.509467\C,0,-0.078645,7.698836,11.814205\Cl,0,3.260  
511,3.081604,12.52382\Cl,0,0.443065,4.678102,13.002542\P,0,2.994464,3.  
494911,9.291313\F,0,-0.558617,2.102449,7.021497\C,0,-0.444371,0.164349  
,8.274475\F,0,-0.966629,2.257059,11.712593\C,0,-0.629347,0.226436,10.6  
335\F,0,2.472983,6.895353,9.43419\C,0,2.536792,8.319711,11.279906\F,0,

-1.337059,7.417618,12.111408\C,0,0.600126,8.610669,12.601341\C,0,2.288  
103,3.461068,7.616143\C,0,3.744577,1.863839,9.548205\C,0,4.368786,4.67  
1164,9.197572\F,0,-0.283371,-0.549047,7.150301\C,0,-0.459539,-0.489395  
,9.483804\F,0,-0.676029,-0.400525,11.812058\F,0,3.813807,8.611887,10.9  
9439\C,0,1.914796,8.915019,12.336577\F,0,-0.040857,9.231544,13.605776\  
C,0,1.581765,4.543336,7.117624\C,0,2.588604,2.399495,6.776531\C,0,2.96  
2443,0.822962,10.003791\C,0,5.058256,1.645924,9.297753\C,0,5.151002,4.  
937774,10.31626\C,0,4.693041,5.329777,8.014482\F,0,-0.325143,-1.824883  
,9.541288\F,0,2.558406,9.789112,13.105587\H,0,1.339665,5.372507,7.7709  
47\C,0,1.181891,4.574989,5.796188\C,0,2.174417,2.433582,5.45271\H,0,3.  
140984,1.547924,7.154118\C,0,3.519912,-0.399308,10.22085\H,0,1.906356,  
0.978424,10.186979\C,0,5.604357,0.385915,9.512426\H,0,5.682237,2.45245  
2,8.933046\H,0,4.911926,4.463718,11.260109\C,0,6.217889,5.791171,10.24  
2317\C,0,5.728672,6.209957,7.959621\H,0,4.108508,5.139254,7.12287\H,0,  
0.635316,5.425951,5.408821\C,0,1.490647,3.501242,4.968502\H,0,2.4011,1  
.600394,4.799148\H,0,2.90582,-1.213018,10.586272\C,0,4.835547,-0.60383  
1,9.984709\H,0,6.650148,0.204036,9.297515\H,0,6.842899,5.952842,11.111  
745\C,0,6.49363,6.437611,9.075924\H,0,5.950183,6.728326,7.034855\H,0,1  
.181705,3.51719,3.930674\H,0,5.270361,-1.576412,10.179585\H,0,7.319936  
,7.136154,9.029411\F,0,-3.136716,-2.25706,12.140032\C,0,-3.355684,-1.6  
15491,13.293067\C,0,-3.473998,-0.226437,13.219125\C,0,-3.423927,-2.316  
713,14.485699\F,0,-3.427316,0.400524,12.040566\C,0,-3.643806,0.489394,  
14.368821\C,0,-3.305372,-3.794636,14.566798\C,0,-3.53197,-1.532707,15.  
618699\F,0,-3.778202,1.824882,14.311337\C,0,-3.658974,-0.164349,15.578  
15\C,0,-4.155184,-4.684556,13.866724\C,0,-2.336509,-4.33151,15.413567\  
F,0,-3.544727,-2.10245,16.831127\F,0,-3.819974,0.549047,16.702324\Au,0  
, -5.718679,-3.994046,12.739925\C,0,-3.908816,-6.062653,13.932319\C,0,-  
2.155828,-5.696215,15.561453\H,0,-1.702064,-3.656705,15.974818\Cl,0,-7  
.363855,-3.081605,11.328804\Cl,0,-4.54641,-4.678103,10.850082\P,0,-7.0  
97809,-3.494912,14.561312\C,0,-2.922527,-6.547178,14.771931\C,0,-4.632  
383,-7.053616,13.097476\C,0,-1.209872,-6.272046,16.558493\C,0,-6.39144  
8,-3.461069,16.236483\C,0,-7.847921,-1.86384,14.304419\C,0,-8.472132,-  
4.671165,14.655053\H,0,-2.743529,-7.614351,14.817489\C,0,-5.939353,-7.  
429793,13.343159\C,0,-4.0247,-7.698838,12.03842\C,0,-1.659149,-7.16927  
,17.526909\C,0,0.122222,-5.962826,16.577574\C,0,-5.68511,-4.543337,16.  
735003\C,0,-6.691949,-2.399496,17.076094\C,0,-7.065788,-0.822963,13.84  
8835\C,0,-9.161601,-1.645926,14.554872\C,0,-9.254347,-4.937775,13.5363  
65\C,0,-8.796386,-5.329778,15.838142\F,0,-6.576328,-6.895354,14.418435  
\C,0,-6.640137,-8.319713,12.57272\F,0,-2.766286,-7.417619,11.741217\C,  
0,-4.703472,-8.610671,11.251284\F,0,-2.949087,-7.487011,17.59656\C,0,-  
0.813599,-7.720752,18.457161\F,0,0.620461,-5.110646,15.666881\C,0,1.00  
3928,-6.517961,17.503056\H,0,-5.44301,-5.372509,16.081678\C,0,-5.28523  
6,-4.57499,18.056438\C,0,-6.277762,-2.433583,18.399914\H,0,-7.244329,-  
1.547925,16.698507\H,0,-6.009701,-0.978425,13.665647\C,0,-7.623257,0.3  
99306,13.631775\C,0,-9.707703,-0.385917,14.340198\H,0,-9.785583,-2.452  
453,14.919579\H,0,-9.015271,-4.463719,12.592517\C,0,-10.321234,-5.7911  
73,13.610307\C,0,-9.832017,-6.209958,15.893003\H,0,-8.211852,-5.139255  
,16.729753\F,0,-7.917152,-8.611888,12.858234\C,0,-6.018141,-8.915021,1  
1.516047\F,0,-4.062488,-9.231544,10.246849\F,0,-1.273978,-8.558323,19.  
387413\C,0,0.50102,-7.396923,18.423767\F,0,2.288193,-6.183176,17.48349  
8\H,0,-4.738661,-5.425952,18.443804\C,0,-5.593992,-3.501243,18.884123\  
H,0,-6.504445,-1.600395,19.053476\H,0,-7.009165,1.213017,13.266353\C,0  
, -8.938892,0.60383,13.867915\H,0,-10.753493,-0.204037,14.55511\H,0,-10

.946244,-5.952843,12.74088\C,0,-10.596975,-6.437612,14.776701\H,0,-10.053529,-6.728327,16.81777\F,0,-6.661751,-9.789114,10.747039\F,0,1.366797,-7.944753,19.313471\H,0,-5.28505,-3.517191,19.921951\H,0,-9.373706,1.576411,13.67304\H,0,-11.423281,-7.136156,14.823214\\Version=ES64L-GO9RevE.01\HF=-4505.5965462\RMSD=5.816e-09\Dipole=-0.0000073,-0.0000063,0.0000016\Quadrupole=31.3874668,-36.7894104,5.4019436,13.8589924,-72.9240438,-52.2269982\PG=C01 [X(C84H34Au2Cl4F30P2)]\ \@

1\1\GINC-COMPUTE040\SP\RB3LYP\Gen\C84H34Au2Cl4F30P2\CRAT\18-Sep-2020\0  
\\#p b3lyp/gen pseudo=read counterpoise=2 empiricaldispersion=gd3bj no  
symm gfprint\\CrystalExplorer Job symop = -x, -y, -z, r = 8.09874\\0,1  
\F,0,-1.154257,7.48701,6.256066\C,0,-2.444196,7.169269,6.325716\C,0,-2.893473,6.272045,7.294133\C,0,-3.289746,7.72075,5.395464\C,0,-1.947517,5.696214,8.291173\C,0,-4.225567,5.962825,7.275051\F,0,-2.829366,8.558322,4.465211\C,0,-4.604365,7.396922,5.428857\C,0,-1.766835,4.331509,8.439058\C,0,-1.180818,6.547177,9.080694\F,0,-4.723805,5.110645,8.185744\C,0,-5.107273,6.517959,6.349569\F,0,-5.470142,7.944752,4.539155\H,0,-2.401281,3.656704,7.877806\C,0,-0.797973,3.794635,9.285827\C,0,-0.194529,6.062651,9.920306\H,0,-1.359815,7.61435,9.035135\F,0,-6.391539,6.183174,6.369128\C,0,0.051839,4.684555,9.985902\C,0,-0.679418,2.316712,9.366925\C,0,0.529038,7.053615,10.755148\Au,0,1.615334,3.994045,11.1127\C,0,-0.571375,1.532706,8.233926\C,0,-0.747661,1.615489,10.559557\C,0,1.836008,7.429791,10.509467\C,0,-0.078645,7.698836,11.814205\Cl,0,3.260511,3.081604,12.52382\Cl,0,0.443065,4.678102,13.002542\P,0,2.994464,3.494911,9.291313\F,0,-0.558617,2.102449,7.021497\C,0,-0.444371,0.164349,8.274475\F,0,-0.966629,2.257059,11.712593\C,0,-0.629347,0.226436,10.6335\F,0,2.472983,6.895353,9.43419\C,0,2.536792,8.319711,11.279906\F,0,-1.337059,7.417618,12.111408\C,0,0.600126,8.610669,12.601341\C,0,2.288103,3.461068,7.616143\C,0,3.744577,1.863839,9.548205\C,0,4.368786,4.671164,9.197572\F,0,-0.283371,-0.549047,7.150301\C,0,-0.459539,-0.489395,9.483804\F,0,-0.676029,-0.400525,11.812058\F,0,3.813807,8.611887,10.99439\C,0,1.914796,8.915019,12.336577\F,0,-0.040857,9.231544,13.605776\C,0,1.581765,4.543336,7.117624\C,0,2.588604,2.399495,6.776531\C,0,2.962443,0.822962,10.003791\C,0,5.058256,1.645924,9.297753\C,0,5.151002,4.937774,10.31626\C,0,4.693041,5.329777,8.014482\F,0,-0.325143,-1.824883,9.541288\F,0,2.558406,9.789112,13.105587\H,0,1.339665,5.372507,7.770947\C,0,1.181891,4.574989,5.796188\C,0,2.174417,2.433582,5.45271\H,0,3.140984,1.547924,7.154118\C,0,3.519912,-0.399308,10.22085\H,0,1.906356,0.978424,10.186979\C,0,5.604357,0.385915,9.512426\H,0,5.682237,2.452452,8.933046\H,0,4.911926,4.463718,11.260109\C,0,6.217889,5.791171,10.242317\C,0,5.728672,6.209957,7.959621\H,0,4.108508,5.139254,7.12287\H,0,0.635316,5.425951,5.408821\C,0,1.490647,3.501242,4.968502\H,0,2.4011,1.600394,4.799148\H,0,2.90582,-1.213018,10.586272\C,0,4.835547,-0.603831,9.984709\H,0,6.650148,0.204036,9.297515\H,0,6.842899,5.952842,11.111745\C,0,6.49363,6.437611,9.075924\H,0,5.950183,6.728326,7.034855\H,0,1.181705,3.51719,3.930674\H,0,5.270361,-1.576412,10.179585\H,0,7.319936,7.136154,9.029411\Cl,0,-4.546411,7.495896,10.850082\Au,0,-5.71868,8.179954,12.739925\C,0,-4.155184,7.489444,13.866724\Cl,0,-7.363856,9.092395,11.328804\P,0,-7.097809,8.679088,14.561312\C,0,-3.908816,6.111347,13.932319\C,0,-3.305372,8.379363,14.566798\C,0,-6.391449,8.712931,16.236483\C,0,-7.847921,10.31016,14.304419\C,0,-8.472133,7.502835,14.655053\C,0,-2.922528,5.626822,14.771931\C,0,-4.632383,5.120384,13.097476\C,0,-3.423928,9.857287,14.485699\C,0,-2.33651,7.84249,15.413567\C,0,-5.68

5111,7.630662,16.735003\C,0,-6.69195,9.774504,17.076094\C,0,-7.065788,  
11.351036,13.848835\C,0,-9.161602,10.528074,14.554872\C,0,-9.254347,7.  
236225,13.536365\C,0,-8.796387,6.844222,15.838142\H,0,-2.74353,4.55964  
9,14.817489\C,0,-2.155828,6.477785,15.561453\C,0,-4.024701,4.475162,12  
.03842\C,0,-5.939354,4.744207,13.343159\C,0,-3.355684,10.558509,13.293  
067\C,0,-3.531971,10.641293,15.618699\H,0,-1.702064,8.517295,15.974818  
\H,0,-5.44301,6.801491,16.081678\C,0,-5.285236,7.59901,18.056438\C,0,-  
6.277762,9.740417,18.399914\H,0,-7.24433,10.626075,16.698507\H,0,-6.00  
9702,11.195575,13.665647\C,0,-7.623258,12.573306,13.631775\C,0,-9.7077  
03,11.788083,14.340198\H,0,-9.785583,9.721547,14.919579\H,0,-9.015271,  
7.71028,12.592517\C,0,-10.321235,6.382827,13.610307\C,0,-9.832017,5.96  
4042,15.893003\H,0,-8.211853,7.034745,16.729753\C,0,-1.209872,5.901954  
,16.558493\F,0,-2.766287,4.756381,11.741217\C,0,-4.703472,3.563329,11.  
251284\C,0,-6.640137,3.854288,12.57272\F,0,-6.576328,5.278646,14.41843  
5\F,0,-3.136717,9.91694,12.140032\C,0,-3.473999,11.947563,13.219125\F,  
0,-3.544728,10.071549,16.831127\C,0,-3.658975,12.00965,15.57815\H,0,-4  
.738662,6.748047,18.443804\C,0,-5.593993,8.672757,18.884123\H,0,-6.504  
445,10.573605,19.053476\H,0,-7.009165,13.387016,13.266353\C,0,-8.93889  
2,12.777829,13.867915\H,0,-10.753493,11.969963,14.55511\H,0,-10.946245  
,6.221157,12.74088\C,0,-10.596975,5.736388,14.776701\H,0,-10.053529,5.  
445673,16.81777\C,0,0.122221,6.211174,16.577574\C,0,-1.65915,5.00473,1  
7.526909\F,0,-4.062489,2.942455,10.246849\C,0,-6.018142,3.258979,11.51  
6047\F,0,-7.917152,3.562112,12.858234\F,0,-3.427317,12.574524,12.04056  
6\C,0,-3.643806,12.663394,14.368821\F,0,-3.819975,12.723046,16.702324\  
H,0,-5.28505,8.656809,19.921951\H,0,-9.373707,13.75041,13.67304\H,0,-1  
1.423282,5.037844,14.823214\F,0,0.62046,7.063354,15.666881\C,0,1.00392  
7,5.656039,17.503056\F,0,-2.949088,4.686989,17.59656\C,0,-0.813599,4.4  
53248,18.457161\F,0,-6.661752,2.384886,10.747039\F,0,-3.778203,13.9988  
81,14.311337\F,0,2.288193,5.990824,17.483498\C,0,0.50102,4.777077,18.4  
23767\F,0,-1.273979,3.615677,19.387413\F,0,1.366797,4.229247,19.313471  
\Version=E564L-G09RevE.01\HF=-4505.5965107\RMSD=5.815e-09\Dipole=-0.0  
000065,-0.000013,0.000006\Quadrupole=21.5786405,-18.6945172,-2.88412  
33,-18.9299458,-71.6872824,35.236456\PG=C01 [X(C84H34Au2Cl4F30P2)]\@\

1\1\GINC-COMPUTE008\SP\RB3LYP\Gen\C43H18Au1Cl5F15P1\CRAT\18-Sep-2020\0  
\#p b3lyp/gen pseudo=read counterpoise=2 empiricaldispersion=gd3bj no  
symm gfprint\CrystalExplorer Job symop = -, r = 7.63856\0,1\F,0,-1.1  
54257,7.48701,6.256066\C,0,-2.444196,7.169269,6.325716\C,0,-2.893473,6  
.272045,7.294133\C,0,-3.289746,7.72075,5.395464\C,0,-1.947517,5.696214  
,8.291173\C,0,-4.225567,5.962825,7.275051\F,0,-2.829366,8.558322,4.465  
211\C,0,-4.604365,7.396922,5.428857\C,0,-1.766835,4.331509,8.439058\C,  
0,-1.180818,6.547177,9.080694\F,0,-4.723805,5.110645,8.185744\C,0,-5.1  
07273,6.517959,6.349569\F,0,-5.470142,7.944752,4.539155\H,0,-2.401281,  
3.656704,7.877806\C,0,-0.797973,3.794635,9.285827\C,0,-0.194529,6.0626  
51,9.920306\H,0,-1.359815,7.61435,9.035135\F,0,-6.391539,6.183174,6.36  
9128\C,0,0.051839,4.684555,9.985902\C,0,-0.679418,2.316712,9.366925\C,  
0,0.529038,7.053615,10.755148\Au,0,1.615334,3.994045,11.1127\C,0,-0.57  
1375,1.532706,8.233926\C,0,-0.747661,1.615489,10.559557\C,0,1.836008,7  
.429791,10.509467\C,0,-0.078645,7.698836,11.814205\Cl,0,3.260511,3.081  
604,12.52382\Cl,0,0.443065,4.678102,13.002542\P,0,2.994464,3.494911,9.  
291313\F,0,-0.558617,2.102449,7.021497\C,0,-0.444371,0.164349,8.274475  
\F,0,-0.966629,2.257059,11.712593\C,0,-0.629347,0.226436,10.6335\F,0,2  
.472983,6.895353,9.43419\C,0,2.536792,8.319711,11.279906\F,0,-1.337059

,7.417618,12.111408\C,0,0.600126,8.610669,12.601341\C,0,2.288103,3.461068,7.616143\C,0,3.744577,1.863839,9.548205\C,0,4.368786,4.671164,9.197572\F,0,-0.283371,-0.549047,7.150301\C,0,-0.459539,-0.489395,9.483804\F,0,-0.676029,-0.400525,11.812058\F,0,3.813807,8.611887,10.99439\C,0,1.914796,8.915019,12.336577\F,0,-0.040857,9.231544,13.605776\C,0,1.581765,4.543336,7.117624\C,0,2.588604,2.399495,6.776531\C,0,2.962443,0.822962,10.003791\C,0,5.058256,1.645924,9.297753\C,0,5.151002,4.937774,10.31626\C,0,4.693041,5.329777,8.014482\F,0,-0.325143,-1.824883,9.541288\F,0,2.558406,9.789112,13.105587\H,0,1.339665,5.372507,7.770947\C,0,1.181891,4.574989,5.796188\C,0,2.174417,2.433582,5.45271\H,0,3.140984,1.547924,7.154118\C,0,3.519912,-0.399308,10.22085\H,0,1.906356,0.978424,10.186979\C,0,5.604357,0.385915,9.512426\H,0,5.682237,2.452452,8.933046\H,0,4.911926,4.463718,11.260109\C,0,6.217889,5.791171,10.242317\C,0,5.728672,6.209957,7.959621\H,0,4.108508,5.139254,7.12287\H,0,0.635316,5.425951,5.408821\C,0,1.490647,3.501242,4.968502\H,0,2.4011,1.600394,4.799148\H,0,2.90582,-1.213018,10.586272\C,0,4.835547,-0.603831,9.984709\H,0,6.650148,0.204036,9.297515\H,0,6.842899,5.952842,11.111745\C,0,6.49363,6.437611,9.075924\H,0,5.950183,6.728326,7.034855\H,0,1.181705,3.51719,3.930674\H,0,5.270361,-1.576412,10.179585\H,0,7.319936,7.136154,9.029411\Cl,0,-4.063099,5.711188,2.421995\C,0,-4.222633,4.14403,3.141391\Cl,0,-5.803228,3.952776,3.856492\Cl,0,-2.984379,3.893488,4.343563\H,0,-4.104627,3.39679,2.366419\\Version=ES64L-G09RevE.01\HF=-1419.2748938\RMSD=2.681e-09\Dipole=1.5563797,-0.8473894,-4.3208058\Quadrupole=68.9957578,44.041205,-113.0369628,12.0891027,17.7221246,-43.7155361\PG=C01 [X(C43H18Au1Cl5F15P1)]\@\@

1\1\GINC-COMPUTE035\SP\RB3LYP\Gen\C43H18Au1Cl5F15P1\CRAT\18-Sep-2020\0  
\\#p b3lyp/gen pseudo=read counterpoise=2 empiricaldispersion=gd3bj no  
symm gfprint\CrystalExplorer Job symop = -, r = 8.40241\\0,1\F,0,-1.154257,7.48701,6.256066\C,0,-2.444196,7.169269,6.325716\C,0,-2.893473,6.272045,7.294133\C,0,-3.289746,7.72075,5.395464\C,0,-1.947517,5.696214,8.291173\C,0,-4.225567,5.962825,7.275051\F,0,-2.829366,8.558322,4.465211\C,0,-4.604365,7.396922,5.428857\C,0,-1.766835,4.331509,8.439058\C,0,-1.180818,6.547177,9.080694\F,0,-4.723805,5.110645,8.185744\C,0,-5.107273,6.517959,6.349569\F,0,-5.470142,7.944752,4.539155\H,0,-2.401281,3.656704,7.877806\C,0,-0.797973,3.794635,9.285827\C,0,-0.194529,6.062651,9.920306\H,0,-1.359815,7.61435,9.035135\F,0,-6.391539,6.183174,6.369128\C,0,0.051839,4.684555,9.985902\C,0,-0.679418,2.316712,9.366925\C,0,0.529038,7.053615,10.755148\Au,0,1.615334,3.994045,11.1127\C,0,-0.571375,1.532706,8.233926\C,0,-0.747661,1.615489,10.559557\C,0,1.836008,7.429791,10.509467\C,0,-0.078645,7.698836,11.814205\Cl,0,3.260511,3.081604,12.52382\Cl,0,0.443065,4.678102,13.002542\P,0,2.994464,3.494911,9.291313\F,0,-0.558617,2.102449,7.021497\C,0,-0.444371,0.164349,8.274475\F,0,-0.966629,2.257059,11.712593\C,0,-0.629347,0.226436,10.6335\F,0,2.472983,6.895353,9.43419\C,0,2.536792,8.319711,11.279906\F,0,-1.337059,7.417618,12.111408\C,0,0.600126,8.610669,12.601341\C,0,2.288103,3.461068,7.616143\C,0,3.744577,1.863839,9.548205\C,0,4.368786,4.671164,9.197572\F,0,-0.283371,-0.549047,7.150301\C,0,-0.459539,-0.489395,9.483804\F,0,-0.676029,-0.400525,11.812058\F,0,3.813807,8.611887,10.99439\C,0,1.914796,8.915019,12.336577\F,0,-0.040857,9.231544,13.605776\C,0,1.581765,4.543336,7.117624\C,0,2.588604,2.399495,6.776531\C,0,2.962443,0.822962,10.003791\C,0,5.058256,1.645924,9.297753\C,0,5.151002,4.937774,10.31626\C,0,4.693041,5.329777,8.014482\F,0,-0.325143,-1.824883,9.541288

\F,0,2.558406,9.789112,13.105587\H,0,1.339665,5.372507,7.770947\C,0,1.181891,4.574989,5.796188\C,0,2.174417,2.433582,5.45271\H,0,3.140984,1.547924,7.154118\C,0,3.519912,-0.399308,10.22085\H,0,1.906356,0.978424,10.186979\C,0,5.604357,0.385915,9.512426\H,0,5.682237,2.452452,8.933046\H,0,4.911926,4.463718,11.260109\C,0,6.217889,5.791171,10.242317\C,0,5.728672,6.209957,7.959621\H,0,4.108508,5.139254,7.12287\H,0,0.635316,5.425951,5.408821\C,0,1.490647,3.501242,4.968502\H,0,2.4011,1.600394,4.799148\H,0,2.90582,-1.213018,10.586272\C,0,4.835547,-0.603831,9.984709\H,0,6.650148,0.204036,9.297515\H,0,6.842899,5.952842,11.111745\C,0,6.49363,6.437611,9.075924\H,0,5.950183,6.728326,7.034855\H,0,1.181705,3.51719,3.930674\H,0,5.270361,-1.576412,10.179585\H,0,7.319936,7.136154,9.029411\C,0,-3.609945,10.039775,8.069819\C,0,-5.19054,10.231029,8.784922\C,0,-6.428794,9.980488,7.582749\C,0,-5.350074,11.798187,9.504317\H,0,-5.308546,9.483788,9.559894\\Version=ES64L-G09RevE.01\HF=-1419.2748939\RMSD=2.681e-09\Dipole=1.5189488,-0.7692666,-3.5220066\Quadrupole=65.933061,34.5111741,-100.4442351,10.4839803,10.1311017,-36.1893409\PG=C01 [X(C43H18Au1Cl5F15P1)]\@

1\1\GINC-COMPUTE016\SP\RB3LYP\Gen\C84H34Au2Cl4F30P2\CRAT\18-Sep-2020\0  
\\#p b3lyp/gen pseudo=read counterpoise=2 empiricaldispersion=gd3bj no  
symm gfprint\CystalExplorer Job symop = x+1/2, -y+1/2, z+1/2, r = 15  
.9768\0,1\F,0,-1.154257,7.48701,6.256066\C,0,-2.444196,7.169269,6.325  
716\C,0,-2.893473,6.272045,7.294133\C,0,-3.289746,7.72075,5.395464\C,0  
,-1.947517,5.696214,8.291173\C,0,-4.225567,5.962825,7.275051\F,0,-2.82  
9366,8.558322,4.465211\C,0,-4.604365,7.396922,5.428857\C,0,-1.766835,4  
.331509,8.439058\C,0,-1.180818,6.547177,9.080694\F,0,-4.723805,5.11064  
5,8.185744\C,0,-5.107273,6.517959,6.349569\F,0,-5.470142,7.944752,4.53  
9155\H,0,-2.401281,3.656704,7.877806\C,0,-0.797973,3.794635,9.285827\C  
,0,-0.194529,6.062651,9.920306\H,0,-1.359815,7.61435,9.035135\F,0,-6.3  
91539,6.183174,6.369128\C,0,0.051839,4.684555,9.985902\C,0,-0.679418,2  
.316712,9.366925\C,0,0.529038,7.053615,10.755148\Au,0,1.615334,3.99404  
5,11.1127\C,0,-0.571375,1.532706,8.233926\C,0,-0.747661,1.615489,10.55  
9557\C,0,1.836008,7.429791,10.509467\C,0,-0.078645,7.698836,11.814205\  
Cl,0,3.260511,3.081604,12.52382\C,0,0.443065,4.678102,13.002542\P,0,2  
.994464,3.494911,9.291313\F,0,-0.558617,2.102449,7.021497\C,0,-0.44437  
1,0.164349,8.274475\F,0,-0.966629,2.257059,11.712593\C,0,-0.629347,0.2  
26436,10.6335\F,0,2.472983,6.895353,9.43419\C,0,2.536792,8.319711,11.2  
79906\F,0,-1.337059,7.417618,12.111408\C,0,0.600126,8.610669,12.601341  
\C,0,2.288103,3.461068,7.616143\C,0,3.744577,1.863839,9.548205\C,0,4.3  
68786,4.671164,9.197572\F,0,-0.283371,-0.549047,7.150301\C,0,-0.459539  
,-0.489395,9.483804\F,0,-0.676029,-0.400525,11.812058\F,0,3.813807,8.6  
11887,10.99439\C,0,1.914796,8.915019,12.336577\F,0,-0.040857,9.231544,  
13.605776\C,0,1.581765,4.543336,7.117624\C,0,2.588604,2.399495,6.77653  
1\C,0,2.962443,0.822962,10.003791\C,0,5.058256,1.645924,9.297753\C,0,5  
.151002,4.937774,10.31626\C,0,4.693041,5.329777,8.014482\F,0,-0.325143  
,-1.824883,9.541288\F,0,2.558406,9.789112,13.105587\H,0,1.339665,5.372  
507,7.770947\C,0,1.181891,4.574989,5.796188\C,0,2.174417,2.433582,5.45  
271\H,0,3.140984,1.547924,7.154118\C,0,3.519912,-0.399308,10.22085\H,0  
,1.906356,0.978424,10.186979\C,0,5.604357,0.385915,9.512426\H,0,5.6822  
37,2.452452,8.933046\H,0,4.911926,4.463718,11.260109\C,0,6.217889,5.79  
1171,10.242317\C,0,5.728672,6.209957,7.959621\H,0,4.108508,5.139254,7.  
12287\H,0,0.635316,5.425951,5.408821\C,0,1.490647,3.501242,4.968502\H,  
0,2.4011,1.600394,4.799148\H,0,2.90582,-1.213018,10.586272\C,0,4.83554

7,-0.603831,9.984709\H,0,6.650148,0.204036,9.297515\H,0,6.842899,5.952  
842,11.111745\C,0,6.49363,6.437611,9.075924\H,0,5.950183,6.728326,7.03  
4855\H,0,1.181705,3.51719,3.930674\H,0,5.270361,-1.576412,10.179585\H,  
0,7.319936,7.136154,9.029411\F,0,-2.751421,8.471887,1.179274\C,0,-3.39  
5031,9.34598,0.410265\C,0,-4.709701,9.65033,0.675029\C,0,-2.773036,9.9  
41289,-0.646407\F,0,-5.350684,9.029455,1.679463\C,0,-5.388472,10.56216  
2,-0.112107\F,0,-1.49602,9.649112,-0.931922\C,0,-3.473819,10.831207,-1  
.416846\F,0,-6.646886,10.843381,0.185096\C,0,-4.780789,11.207384,-1.17  
1163\F,0,-2.836845,11.365646,-2.492123\C,0,-5.504357,12.198348,-2.0060  
06\C,0,-5.257989,13.576445,-1.940412\C,0,-6.490645,11.713822,-2.845618  
\Au,0,-3.694493,14.266953,-0.813613\C,0,-6.107801,14.466364,-2.640486\  
H,0,-6.669643,10.646649,-2.891176\C,0,-7.257345,12.564785,-3.63514\Cl,  
0,-2.049317,15.179395,0.597508\Cl,0,-4.866763,13.582897,1.07623\P,0,-2  
.315364,14.766088,-2.635\C,0,-7.076663,13.929491,-3.487254\C,0,-5.9892  
45,15.944288,-2.559386\C,0,-8.2033,11.988955,-4.632179\C,0,-3.021724,1  
4.799932,-4.310169\C,0,-1.565252,16.39716,-2.378106\C,0,-0.941041,13.5  
89836,-2.728741\H,0,-7.711109,14.604296,-4.048506\C,0,-5.881203,16.728  
292,-3.692386\C,0,-6.057489,16.64551,-1.366755\C,0,-7.754023,11.091731  
, -5.600596\C,0,-9.535394,12.298175,-4.651262\C,0,-3.728063,13.717663,-  
4.80869\C,0,-2.721224,15.861505,-5.149782\C,0,-2.347385,17.438038,-1.9  
22522\C,0,-0.251572,16.615076,-2.628559\C,0,-0.158826,13.323225,-1.610  
052\C,0,-0.616787,12.931223,-3.91183\F,0,-5.868445,16.15855,-4.904815\  
C,0,-5.754199,18.096651,-3.651837\F,0,-6.276457,16.003941,-0.21372\C,0  
, -5.939175,18.034563,-1.292812\F,0,-6.464085,10.77399,-5.670246\C,0,-8  
.599573,10.54025,-6.530849\F,0,-10.033633,13.150354,-3.740569\C,0,-10.  
4171,11.743041,-5.576744\H,0,-3.970163,12.888492,-4.155366\C,0,-4.1279  
37,13.686011,-6.130126\C,0,-3.135411,15.827417,-6.473602\H,0,-2.168844  
,16.713076,-4.772195\H,0,-3.403472,17.282576,-1.739334\C,0,-1.789916,1  
8.660307,-1.705463\C,0,0.294529,17.875084,-2.413885\H,0,0.37241,15.808  
548,-2.993266\H,0,-0.397902,13.797281,-0.666204\C,0,0.908061,12.469828  
, -1.683995\C,0,0.418844,12.051043,-3.966691\H,0,-1.20132,13.121746,-4.  
803442\F,0,-5.593199,18.810047,-4.776011\C,0,-5.769368,18.750395,-2.44  
2509\F,0,-5.985857,18.661524,-0.114254\F,0,-8.139194,9.702678,-7.46110  
1\C,0,-9.914193,10.864079,-6.497456\F,0,-11.701365,12.077826,-5.557185  
\H,0,-4.674511,12.835049,-6.51749\C,0,-3.81918,14.759758,-6.957811\H,0  
, -2.908728,16.660606,-7.127164\H,0,-2.404008,19.474018,-1.34004\C,0,-0  
.474281,18.86483,-1.941603\H,0,1.34032,18.056963,-2.628798\H,0,1.53307  
2,12.308157,-0.814567\C,0,1.183802,11.823389,-2.850388\H,0,0.640356,11  
.532674,-4.891458\F,0,-5.634971,20.085882,-2.385024\F,0,-10.779969,10.  
316248,-7.387158\H,0,-4.128123,14.74381,-7.995639\H,0,-0.039467,19.837  
412,-1.746728\H,0,2.010108,11.124845,-2.896901\\Version=ES64L-G09RevE.  
01\HF=-4505.5965546\RMSD=5.816e-09\Dipole=3.0974013,0.1683688,-7.79582  
33\Quadrupole=38.0554764,71.8115985,-109.8670749,47.9905307,31.8379956  
, -144.6522364\PG=C01 [X(C84H34Au2Cl4F30P2)]\@

1\1\GINC-COMPUTE008\SP\RB3LYP\Gen\C84H34Au2Cl4F30P2\CRAT\18-Sep-2020\0  
\#p b3lyp/gen pseudo=read counterpoise=2 empiricaldispersion=gd3bj no  
symm gfprint\CrystalExplorer Job symop = -x+1/2, y+1/2, -z+1/2, r = 1  
4.0335\0,1\F,0,-1.154257,7.48701,6.256066\C,0,-2.444196,7.169269,6.32  
5716\C,0,-2.893473,6.272045,7.294133\C,0,-3.289746,7.72075,5.395464\C,  
0,-1.947517,5.696214,8.291173\C,0,-4.225567,5.962825,7.275051\F,0,-2.8  
29366,8.558322,4.465211\C,0,-4.604365,7.396922,5.428857\C,0,-1.766835,  
4.331509,8.439058\C,0,-1.180818,6.547177,9.080694\F,0,-4.723805,5.1106

45,8.185744\C,0,-5.107273,6.517959,6.349569\F,0,-5.470142,7.944752,4.5  
39155\H,0,-2.401281,3.656704,7.877806\C,0,-0.797973,3.794635,9.285827\  
C,0,-0.194529,6.062651,9.920306\H,0,-1.359815,7.61435,9.035135\F,0,-6.  
391539,6.183174,6.369128\C,0,0.051839,4.684555,9.985902\C,0,-0.679418,  
2.316712,9.366925\C,0,0.529038,7.053615,10.755148\Au,0,1.615334,3.9940  
45,11.1127\C,0,-0.571375,1.532706,8.233926\C,0,-0.747661,1.615489,10.5  
59557\C,0,1.836008,7.429791,10.509467\C,0,-0.078645,7.698836,11.814205  
\Cl,0,3.260511,3.081604,12.52382\Cl,0,0.443065,4.678102,13.002542\P,0,  
2.994464,3.494911,9.291313\F,0,-0.558617,2.102449,7.021497\C,0,-0.4443  
71,0.164349,8.274475\F,0,-0.966629,2.257059,11.712593\C,0,-0.629347,0.  
226436,10.6335\F,0,2.472983,6.895353,9.43419\C,0,2.536792,8.319711,11.  
279906\F,0,-1.337059,7.417618,12.111408\C,0,0.600126,8.610669,12.60134  
1\C,0,2.288103,3.461068,7.616143\C,0,3.744577,1.863839,9.548205\C,0,4.  
368786,4.671164,9.197572\F,0,-0.283371,-0.549047,7.150301\C,0,-0.45953  
9,-0.489395,9.483804\F,0,-0.676029,-0.400525,11.812058\F,0,3.813807,8.  
611887,10.99439\C,0,1.914796,8.915019,12.336577\F,0,-0.040857,9.231544  
,13.605776\C,0,1.581765,4.543336,7.117624\C,0,2.588604,2.399495,6.7765  
31\C,0,2.962443,0.822962,10.003791\C,0,5.058256,1.645924,9.297753\C,0,  
5.151002,4.937774,10.31626\C,0,4.693041,5.329777,8.014482\F,0,-0.32514  
3,-1.824883,9.541288\F,0,2.558406,9.789112,13.105587\H,0,1.339665,5.37  
2507,7.770947\C,0,1.181891,4.574989,5.796188\C,0,2.174417,2.433582,5.4  
5271\H,0,3.140984,1.547924,7.154118\C,0,3.519912,-0.399308,10.22085\H,  
0,1.906356,0.978424,10.186979\C,0,5.604357,0.385915,9.512426\H,0,5.682  
237,2.452452,8.933046\H,0,4.911926,4.463718,11.260109\C,0,6.217889,5.7  
91171,10.242317\C,0,5.728672,6.209957,7.959621\H,0,4.108508,5.139254,7  
.12287\H,0,0.635316,5.425951,5.408821\C,0,1.490647,3.501242,4.968502\H  
,0,2.4011,1.600394,4.799148\H,0,2.90582,-1.213018,10.586272\C,0,4.8355  
47,-0.603831,9.984709\H,0,6.650148,0.204036,9.297515\H,0,6.842899,5.95  
2842,11.111745\C,0,6.49363,6.437611,9.075924\H,0,5.950183,6.728326,7.0  
34855\H,0,1.181705,3.51719,3.930674\H,0,5.270361,-1.576412,10.179585\H  
,0,7.319936,7.136154,9.029411\F,0,-8.854555,8.189449,4.904815\C,0,-8.8  
41798,7.619706,3.692386\C,0,-8.968801,6.251348,3.651837\C,0,-8.733755,  
8.403711,2.559387\F,0,-9.129802,5.537952,4.776011\C,0,-8.953633,5.5976  
05,2.442509\C,0,-8.615199,9.881636,2.640486\C,0,-8.665512,7.70249,1.36  
6755\F,0,-9.08803,4.262117,2.385024\C,0,-8.783826,6.313436,1.292812\C,  
0,-7.646338,10.418509,3.487254\C,0,-9.465012,10.771555,1.940411\F,0,-8  
.446544,8.34406,0.21372\F,0,-8.737144,5.686475,0.114254\H,0,-7.011892,  
9.743704,4.048506\C,0,-7.465656,11.783214,3.63514\C,0,-9.218643,12.149  
652,2.006006\Au,0,-11.028507,10.081046,0.813613\C,0,-6.5197,12.359044,  
4.63218\C,0,-8.232355,12.634177,2.845618\C,0,-9.942211,13.140615,1.171  
164\Cl,0,-12.673683,9.168605,-0.597508\Cl,0,-9.856237,10.765103,-1.076  
23\P,0,-12.407637,9.581911,2.635\C,0,-5.187606,12.049825,4.651262\C,0,  
-6.968977,13.256269,5.600596\H,0,-8.053358,13.701349,2.891177\C,0,-11.  
249182,13.516792,1.416846\C,0,-9.334528,13.785837,0.112107\C,0,-11.701  
276,9.548068,4.310169\C,0,-13.157749,7.95084,2.378107\C,0,-13.78196,10  
.758163,2.72874\F,0,-4.689367,11.197644,3.740569\C,0,-4.3059,12.604959  
,5.576744\F,0,-8.258916,13.57401,5.670246\C,0,-6.123427,13.807751,6.53  
0849\F,0,-11.886156,12.982353,2.492122\C,0,-11.949965,14.406712,0.6464  
06\F,0,-8.076115,13.504618,-0.185096\C,0,-10.0133,14.69767,-0.675029\C  
,0,-10.994939,10.630337,4.808689\C,0,-12.001777,8.486495,5.149782\C,0,  
-12.375616,6.909962,1.922522\C,0,-14.471429,7.732925,2.628559\C,0,-14.  
564175,11.024775,1.610052\C,0,-14.106214,11.416777,3.911831\F,0,-3.021  
634,12.270174,5.557185\C,0,-4.808808,13.483922,6.497455\F,0,-6.583807,



14.645321,7.461101\F,0,-13.22698,14.698887,0.931922\C,0,-11.32797,15.0  
0202,-0.410265\F,0,-9.372316,15.318544,-1.679464\H,0,-10.752838,11.459  
507,4.155366\C,0,-10.595064,10.661989,6.130125\C,0,-11.58759,8.520582,  
6.473602\H,0,-12.554156,7.634924,4.772194\H,0,-11.319529,7.065424,1.73  
9334\C,0,-12.933084,5.687693,1.705463\C,0,-15.017529,6.472916,2.413886  
\H,0,-15.09541,8.539452,2.993266\H,0,-14.325099,10.550718,0.666204\C,0  
, -15.631063,11.878172,1.683995\C,0,-15.141845,12.296957,3.966691\H,0,-  
13.52168,11.226254,4.803442\F,0,-3.943031,14.031752,7.387158\F,0,-11.9  
7158,15.876113,-1.179274\H,0,-10.04849,11.512951,6.517491\C,0,-10.9038  
2,9.588242,6.957811\H,0,-11.814272,7.687394,7.127164\H,0,-12.318993,4.  
873982,1.34004\C,0,-14.248719,5.48317,1.941604\H,0,-16.063322,6.291036  
,2.628798\H,0,-16.256071,12.039843,0.814567\C,0,-15.906803,12.524611,2  
.850389\H,0,-15.363357,12.815326,4.891458\H,0,-10.594878,9.60419,7.995  
638\H,0,-14.683534,4.510589,1.746728\H,0,-16.733109,13.223155,2.896901  
\Version=ES64L-G09RevE.01\HF=-4505.5965465\RMSD=5.817e-09\Dipole=0.18  
9847,-1.1817902,0.0959881\Quadrupole=114.7572141,2.9295376,-117.686751  
8,-6.0871829,-73.4764948,32.518392\PG=C01 [X(C84H34Au2Cl4F30P2)]\@

1\1\GINC-COMPUTE021\SP\RB3LYP\Gen\C84H34Au2Cl4F30P2\CRAT\18-Sep-2020\0  
\#p b3lyp/gen pseudo=read counterpoise=2 empiricaldispersion=gd3bj no  
symm gfprint\CrystalExplorer Job symop = -x+1/2, y+1/2, -z+1/2, r = 9  
.93905\0,1\F,0,-1.154257,7.48701,6.256066\C,0,-2.444196,7.169269,6.32  
5716\C,0,-2.893473,6.272045,7.294133\C,0,-3.289746,7.72075,5.395464\C,  
0,-1.947517,5.696214,8.291173\C,0,-4.225567,5.962825,7.275051\F,0,-2.8  
29366,8.558322,4.465211\C,0,-4.604365,7.396922,5.428857\C,0,-1.766835,  
4.331509,8.439058\C,0,-1.180818,6.547177,9.080694\F,0,-4.723805,5.1106  
45,8.185744\C,0,-5.107273,6.517959,6.349569\F,0,-5.470142,7.944752,4.5  
39155\H,0,-2.401281,3.656704,7.877806\C,0,-0.797973,3.794635,9.285827\  
C,0,-0.194529,6.062651,9.920306\H,0,-1.359815,7.61435,9.035135\F,0,-6.  
391539,6.183174,6.369128\C,0,0.051839,4.684555,9.985902\C,0,-0.679418,  
2.316712,9.366925\C,0,0.529038,7.053615,10.755148\Au,0,1.615334,3.9940  
45,11.1127\C,0,-0.571375,1.532706,8.233926\C,0,-0.747661,1.615489,10.5  
59557\C,0,1.836008,7.429791,10.509467\C,0,-0.078645,7.698836,11.814205  
\Cl,0,3.260511,3.081604,12.52382\Cl,0,0.443065,4.678102,13.002542\P,0,  
2.994464,3.494911,9.291313\F,0,-0.558617,2.102449,7.021497\C,0,-0.4443  
71,0.164349,8.274475\F,0,-0.966629,2.257059,11.712593\C,0,-0.629347,0.  
226436,10.6335\F,0,2.472983,6.895353,9.43419\C,0,2.536792,8.319711,11.  
279906\F,0,-1.337059,7.417618,12.111408\C,0,0.600126,8.610669,12.60134  
1\C,0,2.288103,3.461068,7.616143\C,0,3.744577,1.863839,9.548205\C,0,4.  
368786,4.671164,9.197572\F,0,-0.283371,-0.549047,7.150301\C,0,-0.45953  
9,-0.489395,9.483804\F,0,-0.676029,-0.400525,11.812058\F,0,3.813807,8.  
611887,10.99439\C,0,1.914796,8.915019,12.336577\F,0,-0.040857,9.231544  
,13.605776\C,0,1.581765,4.543336,7.117624\C,0,2.588604,2.399495,6.7765  
31\C,0,2.962443,0.822962,10.003791\C,0,5.058256,1.645924,9.297753\C,0,  
5.151002,4.937774,10.31626\C,0,4.693041,5.329777,8.014482\F,0,-0.32514  
3,-1.824883,9.541288\F,0,2.558406,9.789112,13.105587\H,0,1.339665,5.37  
2507,7.770947\C,0,1.181891,4.574989,5.796188\C,0,2.174417,2.433582,5.4  
5271\H,0,3.140984,1.547924,7.154118\C,0,3.519912,-0.399308,10.22085\H,  
0,1.906356,0.978424,10.186979\C,0,5.604357,0.385915,9.512426\H,0,5.682  
237,2.452452,8.933046\H,0,4.911926,4.463718,11.260109\C,0,6.217889,5.7  
91171,10.242317\C,0,5.728672,6.209957,7.959621\H,0,4.108508,5.139254,7  
.12287\H,0,0.635316,5.425951,5.408821\C,0,1.490647,3.501242,4.968502\H  
,0,2.4011,1.600394,4.799148\H,0,2.90582,-1.213018,10.586272\C,0,4.8355

47,-0.603831,9.984709\H,0,6.650148,0.204036,9.297515\H,0,6.842899,5.95  
2842,11.111745\C,0,6.49363,6.437611,9.075924\H,0,5.950183,6.728326,7.0  
34855\H,0,1.181705,3.51719,3.930674\H,0,5.270361,-1.576412,10.179585\H  
,0,7.319936,7.136154,9.029411\H,0,-1.340322,6.291036,2.628798\C,0,-0.2  
9453,6.472916,2.413886\C,0,0.47428,5.48317,1.941604\C,0,0.25157,7.7329  
25,2.628559\C,0,1.789915,5.687693,1.705463\H,0,0.039466,4.510589,1.746  
728\H,0,-0.37241,8.539452,2.993266\C,0,1.565251,7.95084,2.378107\H,0,2  
.404007,4.873982,1.34004\C,0,2.347384,6.909962,1.922522\H,0,2.315363,9  
.581911,2.635\H,0,3.403471,7.065424,1.739334\C,0,3.021724,9.548068,4.3  
10169\Au,0,3.694492,10.081046,0.813613\C,0,0.94104,10.758163,2.72874\C  
,0,2.721222,8.486495,5.149782\C,0,3.728061,10.630337,4.808689\C,0,5.25  
7987,10.771555,1.940411\Cl,0,2.049316,9.168605,-0.597508\Cl,0,4.866762  
,10.765103,-1.07623\C,0,0.158825,11.024775,1.610052\C,0,0.616786,11.41  
6777,3.911831\C,0,3.135409,8.520582,6.473602\H,0,2.168843,7.634924,4.7  
72194\C,0,4.127936,10.661989,6.130125\H,0,3.970162,11.459507,4.155366\  
C,0,6.1078,9.881636,2.640486\C,0,5.504356,12.149652,2.006006\H,0,0.397  
901,10.550718,0.666204\C,0,-0.908063,11.878172,1.683995\C,0,-0.418845,  
12.296957,3.966691\H,0,1.201319,11.226254,4.803442\C,0,3.81918,9.58824  
2,6.957811\H,0,2.908728,7.687394,7.127164\H,0,4.67451,11.512951,6.5174  
91\C,0,5.989244,8.403711,2.559387\C,0,7.076662,10.418509,3.487254\C,0,  
6.490644,12.634177,2.845618\C,0,4.780788,13.140615,1.171164\H,0,-1.533  
072,12.039843,0.814567\C,0,-1.183804,12.524611,2.850389\H,0,-0.640357,  
12.815326,4.891458\H,0,4.128122,9.60419,7.995638\C,0,5.881202,7.619706  
,3.692386\C,0,6.057488,7.70249,1.366755\C,0,7.257343,11.783214,3.63514  
\H,0,7.711108,9.743704,4.048506\H,0,6.669642,13.701349,2.891177\C,0,3.  
473818,13.516792,1.416846\C,0,5.388472,13.785837,0.112107\H,0,-2.01011  
,13.223155,2.896901\F,0,5.868444,8.189449,4.904815\C,0,5.754198,6.2513  
48,3.651837\C,0,5.939174,6.313436,1.292812\F,0,6.276456,8.34406,0.2137  
2\C,0,8.2033,12.359044,4.63218\F,0,2.836843,12.982353,2.492122\C,0,2.7  
73034,14.406712,0.646406\F,0,6.646885,13.504618,-0.185096\C,0,4.7097,1  
4.69767,-0.675029\F,0,5.593198,5.537952,4.776011\C,0,5.769366,5.597605  
,2.442509\F,0,5.985857,5.686475,0.114254\C,0,7.754023,13.256269,5.6005  
96\C,0,9.535394,12.049825,4.651262\F,0,1.496019,14.698887,0.931922\C,0  
,3.39503,15.00202,-0.410265\F,0,5.350683,15.318544,-1.679464\F,0,5.634  
97,4.262117,2.385024\F,0,6.464084,13.57401,5.670246\C,0,8.599572,13.80  
7751,6.530849\F,0,10.033632,11.197644,3.740569\C,0,10.417099,12.604959  
,5.576744\F,0,2.75142,15.876113,-1.179274\F,0,8.139193,14.645321,7.461  
101\C,0,9.914192,13.483922,6.497455\F,0,11.701365,12.270174,5.557185\F  
,0,10.779968,14.031752,7.387158\\Version=ES64L-G09RevE.01\HF=-4505.596  
5317\RMSE=5.818e-09\Dipole=-0.0215233,-1.0146979,0.0254959\Quadrupole=  
52.9960114,37.5360173,-90.5320287,-24.0511495,32.1700097,30.7540932\PG  
=C01 [X(C84H34Au2Cl4F30P2)]\@

1\1\GINC-COMPUTE035\SP\RB3LYP\Gen\C84H34Au2Cl4F30P2\CRAT\18-Sep-2020\0  
\#p b3lyp/gen pseudo=read counterpoise=2 empiricaldispersion=gd3bj no  
symm gfprint\CrystalExplorer Job symop = x, y, z, r = 14.723\0,1\F,0  
, -1.154257,7.48701,6.256066\C,0,-2.444196,7.169269,6.325716\C,0,-2.893  
473,6.272045,7.294133\C,0,-3.289746,7.72075,5.395464\C,0,-1.947517,5.6  
96214,8.291173\C,0,-4.225567,5.962825,7.275051\F,0,-2.829366,8.558322,  
4.465211\C,0,-4.604365,7.396922,5.428857\C,0,-1.766835,4.331509,8.4390  
58\C,0,-1.180818,6.547177,9.080694\F,0,-4.723805,5.110645,8.185744\C,0  
, -5.107273,6.517959,6.349569\F,0,-5.470142,7.944752,4.539155\H,0,-2.40  
1281,3.656704,7.877806\C,0,-0.797973,3.794635,9.285827\C,0,-0.194529,6

.062651,9.920306\H,0,-1.359815,7.61435,9.035135\F,0,-6.391539,6.183174  
,6.369128\C,0,0.051839,4.684555,9.985902\C,0,-0.679418,2.316712,9.3669  
25\C,0,0.529038,7.053615,10.755148\Au,0,1.615334,3.994045,11.1127\C,0,  
-0.571375,1.532706,8.233926\C,0,-0.747661,1.615489,10.559557\C,0,1.836  
008,7.429791,10.509467\C,0,-0.078645,7.698836,11.814205\Cl,0,3.260511,  
3.081604,12.52382\Cl,0,0.443065,4.678102,13.002542\P,0,2.994464,3.4949  
11,9.291313\F,0,-0.558617,2.102449,7.021497\C,0,-0.444371,0.164349,8.2  
74475\F,0,-0.966629,2.257059,11.712593\C,0,-0.629347,0.226436,10.6335\  
F,0,2.472983,6.895353,9.43419\C,0,2.536792,8.319711,11.279906\F,0,-1.3  
37059,7.417618,12.111408\C,0,0.600126,8.610669,12.601341\C,0,2.288103,  
3.461068,7.616143\C,0,3.744577,1.863839,9.548205\C,0,4.368786,4.671164  
,9.197572\F,0,-0.283371,-0.549047,7.150301\C,0,-0.459539,-0.489395,9.4  
83804\F,0,-0.676029,-0.400525,11.812058\F,0,3.813807,8.611887,10.99439  
\C,0,1.914796,8.915019,12.336577\F,0,-0.040857,9.231544,13.605776\C,0,  
1.581765,4.543336,7.117624\C,0,2.588604,2.399495,6.776531\C,0,2.962443  
,0.822962,10.003791\C,0,5.058256,1.645924,9.297753\C,0,5.151002,4.9377  
74,10.31626\C,0,4.693041,5.329777,8.014482\F,0,-0.325143,-1.824883,9.5  
41288\F,0,2.558406,9.789112,13.105587\H,0,1.339665,5.372507,7.770947\C  
,0,1.181891,4.574989,5.796188\C,0,2.174417,2.433582,5.45271\H,0,3.1409  
84,1.547924,7.154118\C,0,3.519912,-0.399308,10.22085\H,0,1.906356,0.97  
8424,10.186979\C,0,5.604357,0.385915,9.512426\H,0,5.682237,2.452452,8.  
933046\H,0,4.911926,4.463718,11.260109\C,0,6.217889,5.791171,10.242317  
\C,0,5.728672,6.209957,7.959621\H,0,4.108508,5.139254,7.12287\H,0,0.63  
5316,5.425951,5.408821\C,0,1.490647,3.501242,4.968502\H,0,2.4011,1.600  
394,4.799148\H,0,2.90582,-1.213018,10.586272\C,0,4.835547,-0.603831,9.  
984709\H,0,6.650148,0.204036,9.297515\H,0,6.842899,5.952842,11.111745\  
C,0,6.49363,6.437611,9.075924\H,0,5.950183,6.728326,7.034855\H,0,1.181  
705,3.51719,3.930674\H,0,5.270361,-1.576412,10.179585\H,0,7.319936,7.1  
36154,9.029411\C,0,-8.229369,6.437611,9.075924\H,0,-7.403063,7.136154,  
9.029411\C,0,-8.994328,6.209957,7.959621\C,0,-8.505111,5.791171,10.242  
317\H,0,-8.772816,6.728326,7.034855\C,0,-10.029959,5.329777,8.014482\C  
,0,-9.571998,4.937774,10.31626\H,0,-7.880101,5.952842,11.111745\C,0,-1  
0.354214,4.671164,9.197572\H,0,-10.614492,5.139254,7.12287\H,0,-9.8110  
73,4.463718,11.260109\P,0,-11.728536,3.494911,9.291313\Au,0,-13.107665  
,3.994045,11.1127\C,0,-12.434896,3.461068,7.616143\C,0,-10.978423,1.86  
3839,9.548205\Cl,0,-11.462489,3.081604,12.52382\Cl,0,-14.279935,4.6781  
02,13.002542\C,0,-14.671161,4.684555,9.985902\C,0,-13.141234,4.543336,  
7.117624\C,0,-12.134396,2.399495,6.776531\C,0,-11.760556,0.822962,10.0  
03791\C,0,-9.664743,1.645924,9.297753\C,0,-14.917529,6.062651,9.920306  
\C,0,-15.520973,3.794635,9.285827\H,0,-13.383334,5.372507,7.770947\C,0  
, -13.541109,4.574989,5.796188\C,0,-12.548582,2.433582,5.45271\H,0,-11.  
582016,1.547924,7.154118\H,0,-12.816644,0.978424,10.186979\C,0,-11.203  
088,-0.399308,10.22085\C,0,-9.118642,0.385915,9.512426\H,0,-9.040762,2  
.452452,8.933046\C,0,-15.903817,6.547177,9.080694\C,0,-14.193961,7.053  
615,10.755148\C,0,-16.489836,4.331509,8.439058\C,0,-15.402417,2.316712  
,9.366925\H,0,-14.087684,5.425951,5.408821\C,0,-13.232352,3.501242,4.9  
68502\H,0,-12.3219,1.600394,4.799148\H,0,-11.81718,-1.213018,10.586272  
\C,0,-9.887452,-0.603831,9.984709\H,0,-8.072851,0.204036,9.297515\H,0,  
-16.082815,7.61435,9.035135\C,0,-16.670517,5.696214,8.291173\C,0,-12.8  
86992,7.429791,10.509467\C,0,-14.801644,7.698836,11.814205\H,0,-17.124  
281,3.656704,7.877806\C,0,-15.294374,1.532706,8.233926\C,0,-15.47066,1  
.615489,10.559557\H,0,-13.541294,3.51719,3.930674\H,0,-9.452639,-1.576  
412,10.179585\C,0,-17.616472,6.272045,7.294133\F,0,-12.250016,6.895353

,9.43419\C,0,-12.186208,8.319711,11.279906\F,0,-16.060059,7.417618,12.111408\C,0,-14.122873,8.610669,12.601341\F,0,-15.281617,2.102449,7.021497\C,0,-15.167371,0.164349,8.274475\F,0,-15.689629,2.257059,11.712593\C,0,-15.352346,0.226436,10.6335\C,0,-17.167196,7.169269,6.325716\C,0,-18.948566,5.962825,7.275051\F,0,-10.909192,8.611887,10.99439\C,0,-12.808204,8.915019,12.336577\F,0,-14.763856,9.231544,13.605776\F,0,-15.006371,-0.549047,7.150301\C,0,-15.182539,-0.489395,9.483804\F,0,-15.399029,-0.400525,11.812058\F,0,-15.877256,7.48701,6.256066\C,0,-18.012745,7.72075,5.395464\F,0,-19.446806,5.110645,8.185744\C,0,-19.830273,6.517959,6.349569\F,0,-12.164594,9.789112,13.105587\F,0,-15.048142,-1.824883,9.541288\F,0,-17.552366,8.558322,4.465211\C,0,-19.327366,7.396922,5.428857\F,0,-21.114538,6.183174,6.369128\F,0,-20.193142,7.944752,4.539155\\Version=ES64L-G09RevE.01\HF=-4505.5965509\RMSD=5.818e-09\Dipole=3.5277676,-1.0600241,-7.588934\Quadrupole=65.2018719,120.9310714,-186.1329433,37.3637044,141.8576681,-75.9568735\PG=C01 [X(C84H34Au2Cl4F30P2)]\@

1\1\GINC-COMPUTE041\SP\RB3LYP\Gen\C84H34Au2Cl4F30P2\CRAT\18-Sep-2020\0  
\\#p b3lyp/gen pseudo=read counterpoise=2 empiricaldispersion=gd3bj no  
symm gfprint\CrystalExplorer Job symop = -x, -y, -z, r = 13.9983\\0,1  
\F,0,-1.154257,7.48701,6.256066\C,0,-2.444196,7.169269,6.325716\C,0,-2.893473,6.272045,7.294133\C,0,-3.289746,7.72075,5.395464\C,0,-1.947517,5.696214,8.291173\C,0,-4.225567,5.962825,7.275051\F,0,-2.829366,8.558322,4.465211\C,0,-4.604365,7.396922,5.428857\C,0,-1.766835,4.331509,8.439058\C,0,-1.180818,6.547177,9.080694\F,0,-4.723805,5.110645,8.185744\C,0,-5.107273,6.517959,6.349569\F,0,-5.470142,7.944752,4.539155\H,0,-2.401281,3.656704,7.877806\C,0,-0.797973,3.794635,9.285827\C,0,-0.194529,6.062651,9.920306\H,0,-1.359815,7.61435,9.035135\F,0,-6.391539,6.183174,6.369128\C,0,0.051839,4.684555,9.985902\C,0,-0.679418,2.316712,9.366925\C,0,0.529038,7.053615,10.755148\Au,0,1.615334,3.994045,11.1127\C,0,-0.571375,1.532706,8.233926\C,0,-0.747661,1.615489,10.559557\C,0,1.836008,7.429791,10.509467\C,0,-0.078645,7.698836,11.814205\Cl,0,3.260511,3.081604,12.52382\Cl,0,0.443065,4.678102,13.002542\P,0,2.994464,3.494911,9.291313\F,0,-0.558617,2.102449,7.021497\C,0,-0.444371,0.164349,8.274475\F,0,-0.966629,2.257059,11.712593\C,0,-0.629347,0.226436,10.6335\F,0,2.472983,6.895353,9.43419\C,0,2.536792,8.319711,11.279906\F,0,-1.337059,7.417618,12.111408\C,0,0.600126,8.610669,12.601341\C,0,2.288103,3.461068,7.616143\C,0,3.744577,1.863839,9.548205\C,0,4.368786,4.671164,9.197572\F,0,-0.283371,-0.549047,7.150301\C,0,-0.459539,-0.489395,9.483804\F,0,-0.676029,-0.400525,11.812058\F,0,3.813807,8.611887,10.99439\C,0,1.914796,8.915019,12.336577\F,0,-0.040857,9.231544,13.605776\C,0,1.581765,4.543336,7.117624\C,0,2.588604,2.399495,6.776531\C,0,2.962443,0.822962,10.003791\C,0,5.058256,1.645924,9.297753\C,0,5.151002,4.937774,10.31626\C,0,4.693041,5.329777,8.014482\F,0,-0.325143,-1.824883,9.541288\F,0,2.558406,9.789112,13.105587\H,0,1.339665,5.372507,7.770947\C,0,1.181891,4.574989,5.796188\C,0,2.174417,2.433582,5.45271\H,0,3.140984,1.547924,7.154118\C,0,3.519912,-0.399308,10.22085\H,0,1.906356,0.978424,10.186979\C,0,5.604357,0.385915,9.512426\H,0,5.682237,2.452452,8.933046\H,0,4.911926,4.463718,11.260109\C,0,6.217889,5.791171,10.242317\C,0,5.728672,6.209957,7.959621\H,0,4.108508,5.139254,7.12287\H,0,0.635316,5.425951,5.408821\C,0,1.490647,3.501242,4.968502\H,0,2.4011,1.600394,4.799148\H,0,2.90582,-1.213018,10.586272\C,0,4.835547,-0.603831,9.984709\H,0,6.650148,0.204036,9.297515\H,0,6.842899,5.952842,11.111

745\C,0,6.49363,6.437611,9.075924\H,0,5.950183,6.728326,7.034855\H,0,1  
.181705,3.51719,3.930674\H,0,5.270361,-1.576412,10.179585\H,0,7.319936  
,7.136154,9.029411\C,0,7.359144,-3.081605,11.328804\Au,0,9.00432,-3.9  
94046,12.739925\C,0,10.17659,-4.678103,10.850082\P,0,7.625191,-3.4949  
12,14.561312\C,0,10.567816,-4.684556,13.866724\C,0,6.250868,-4.671165,  
14.655053\C,0,8.331552,-3.461069,16.236483\C,0,6.875079,-1.86384,14.30  
4419\C,0,10.814184,-6.062653,13.932319\C,0,11.417628,-3.794636,14.5667  
98\C,0,5.468653,-4.937775,13.536365\C,0,5.926614,-5.329778,15.838142\C  
,0,9.037889,-4.543337,16.735003\C,0,8.031051,-2.399496,17.076094\C,0,7  
.657212,-0.822963,13.848835\C,0,5.561399,-1.645926,14.554872\C,0,11.80  
0472,-6.547178,14.771931\C,0,10.090616,-7.053616,13.097476\C,0,12.3864  
91,-4.33151,15.413567\C,0,11.299072,-2.316713,14.485699\H,0,5.707729,-  
4.463719,12.592517\C,0,4.401766,-5.791173,13.610307\C,0,4.890983,-6.20  
9958,15.893003\H,0,6.511147,-5.139255,16.729753\H,0,9.279989,-5.372509  
,16.081678\C,0,9.437763,-4.57499,18.056438\C,0,8.445238,-2.433583,18.3  
99914\H,0,7.478671,-1.547925,16.698507\C,0,7.099742,0.399306,13.631775  
\H,0,8.713299,-0.978425,13.665647\C,0,5.015297,-0.385917,14.340198\H,0  
,4.937417,-2.452453,14.919579\H,0,11.97947,-7.614351,14.817489\C,0,12.  
567172,-5.696215,15.561453\C,0,8.783647,-7.429793,13.343159\C,0,10.698  
299,-7.698838,12.03842\H,0,13.020936,-3.656705,15.974818\C,0,11.19103,  
-1.532707,15.618699\C,0,11.367315,-1.615491,13.293067\H,0,3.776755,-5.  
952843,12.74088\C,0,4.126025,-6.437612,14.776701\H,0,4.669471,-6.72832  
7,16.81777\H,0,9.984339,-5.425952,18.443804\C,0,9.129007,-3.501243,18.  
884123\H,0,8.218554,-1.600395,19.053476\C,0,5.784108,0.60383,13.867915  
\H,0,7.713835,1.213017,13.266353\H,0,3.969507,-0.204037,14.55511\C,0,1  
3.513127,-6.272046,16.558493\F,0,8.146672,-6.895354,14.418435\C,0,8.08  
2863,-8.319713,12.57272\F,0,11.956713,-7.417619,11.741217\C,0,10.01952  
7,-8.610671,11.251284\F,0,11.178272,-2.10245,16.831127\C,0,11.064025,-  
0.164349,15.57815\F,0,11.586284,-2.25706,12.140032\C,0,11.249002,-0.22  
6437,13.219125\H,0,3.299719,-7.136156,14.823214\H,0,9.437949,-3.517191  
,19.921951\H,0,5.349293,1.576411,13.67304\C,0,13.06385,-7.16927,17.526  
909\C,0,14.845222,-5.962826,16.577574\F,0,6.805848,-8.611888,12.858234  
\C,0,8.704858,-8.915021,11.516047\F,0,10.660512,-9.231544,10.246849\F,  
0,10.903026,0.549047,16.702324\C,0,11.079194,0.489394,14.368821\F,0,11  
.295684,0.400524,12.040566\F,0,11.773912,-7.487011,17.59656\C,0,13.909  
401,-7.720752,18.457161\F,0,15.34346,-5.110646,15.666881\C,0,15.726928  
, -6.517961,17.503056\F,0,8.061248,-9.789114,10.747039\F,0,10.944798,1.  
824882,14.311337\F,0,13.449021,-8.558323,19.387413\C,0,15.22402,-7.396  
923,18.423767\F,0,17.011192,-6.183176,17.483498\F,0,16.089798,-7.94475  
3,19.313471\\Version=ES64L-G09RevE.01\HF=-4505.5965466\RMSD=5.815e-09\  
Dipole=-0.0000049,-0.0000033,0.0000017\Quadrupole=-30.0504565,-5.21530  
67,35.2657632,32.1683681,36.396753,-54.1442261\PG=C01 [X(C84H34Au2Cl4F  
30P2)]\@

1\1\GINC-COMPUTE040\SP\RB3LYP\Gen\C43H18Au1Cl5F15P1\CRAT\18-Sep-2020\0  
\#p b3lyp/gen pseudo=read counterpoise=2 empiricaldispersion=gd3bj no  
symm gfprint\CrystalExplorer Job symop = -, r = 10.887\0,1\F,0,-1.15  
4257,7.48701,6.256066\C,0,-2.444196,7.169269,6.325716\C,0,-2.893473,6.  
272045,7.294133\C,0,-3.289746,7.72075,5.395464\C,0,-1.947517,5.696214,  
8.291173\C,0,-4.225567,5.962825,7.275051\F,0,-2.829366,8.558322,4.4652  
11\C,0,-4.604365,7.396922,5.428857\C,0,-1.766835,4.331509,8.439058\C,0  
, -1.180818,6.547177,9.080694\F,0,-4.723805,5.110645,8.185744\C,0,-5.10  
7273,6.517959,6.349569\F,0,-5.470142,7.944752,4.539155\H,0,-2.401281,3

.656704,7.877806\C,0,-0.797973,3.794635,9.285827\C,0,-0.194529,6.06265  
1,9.920306\H,0,-1.359815,7.61435,9.035135\F,0,-6.391539,6.183174,6.369  
128\C,0,0.051839,4.684555,9.985902\C,0,-0.679418,2.316712,9.366925\C,0  
,0.529038,7.053615,10.755148\Au,0,1.615334,3.994045,11.1127\C,0,-0.571  
375,1.532706,8.233926\C,0,-0.747661,1.615489,10.559557\C,0,1.836008,7.  
429791,10.509467\C,0,-0.078645,7.698836,11.814205\Cl,0,3.260511,3.0816  
04,12.52382\Cl,0,0.443065,4.678102,13.002542\P,0,2.994464,3.494911,9.2  
91313\F,0,-0.558617,2.102449,7.021497\C,0,-0.444371,0.164349,8.274475\  
F,0,-0.966629,2.257059,11.712593\C,0,-0.629347,0.226436,10.6335\F,0,2.  
472983,6.895353,9.43419\C,0,2.536792,8.319711,11.279906\F,0,-1.337059,  
7.417618,12.111408\C,0,0.600126,8.610669,12.601341\C,0,2.288103,3.4610  
68,7.616143\C,0,3.744577,1.863839,9.548205\C,0,4.368786,4.671164,9.197  
572\F,0,-0.283371,-0.549047,7.150301\C,0,-0.459539,-0.489395,9.483804\  
F,0,-0.676029,-0.400525,11.812058\F,0,3.813807,8.611887,10.99439\C,0,1  
.914796,8.915019,12.336577\F,0,-0.040857,9.231544,13.605776\C,0,1.5817  
65,4.543336,7.117624\C,0,2.588604,2.399495,6.776531\C,0,2.962443,0.822  
962,10.003791\C,0,5.058256,1.645924,9.297753\C,0,5.151002,4.937774,10.  
31626\C,0,4.693041,5.329777,8.014482\F,0,-0.325143,-1.824883,9.541288\  
F,0,2.558406,9.789112,13.105587\H,0,1.339665,5.372507,7.770947\C,0,1.1  
81891,4.574989,5.796188\C,0,2.174417,2.433582,5.45271\H,0,3.140984,1.5  
47924,7.154118\C,0,3.519912,-0.399308,10.22085\H,0,1.906356,0.978424,1  
0.186979\C,0,5.604357,0.385915,9.512426\H,0,5.682237,2.452452,8.933046  
\H,0,4.911926,4.463718,11.260109\C,0,6.217889,5.791171,10.242317\C,0,5  
.728672,6.209957,7.959621\H,0,4.108508,5.139254,7.12287\H,0,0.635316,5  
.425951,5.408821\C,0,1.490647,3.501242,4.968502\H,0,2.4011,1.600394,4.  
799148\H,0,2.90582,-1.213018,10.586272\C,0,4.835547,-0.603831,9.984709  
\H,0,6.650148,0.204036,9.297515\H,0,6.842899,5.952842,11.111745\C,0,6.  
49363,6.437611,9.075924\H,0,5.950183,6.728326,7.034855\H,0,1.181705,3.  
51719,3.930674\H,0,5.270361,-1.576412,10.179585\H,0,7.319936,7.136154,  
9.029411\Cl,0,9.372926,-0.375812,9.504317\C,0,9.53246,-1.942971,8.7849  
22\Cl,0,8.294207,-2.193512,7.582749\Cl,0,11.113055,-2.134224,8.069819\  
H,0,9.414454,-2.690211,9.559894\\Version=ES64L-G09RevE.01\HF=-1419.274  
894\RMSD=2.681e-09\Dipole=1.7239385,-0.9296508,-3.5208522\Quadrupole=6  
1.5540766,42.5211862,-104.0752628,3.9998918,23.4509252,-47.0395742\PG=  
C01 [X(C43H18Au1Cl5F15P1)]\@\

1\1\GINC-COMPUTE035\SP\RB3LYP\Gen\C84H34Au2Cl4F30P2\CRAT\18-Sep-2020\0  
\#p b3lyp/gen pseudo=read counterpoise=2 empiricaldispersion=gd3bj no  
symm gfprint\CrystalExplorer Job symop = x, y, z, r = 12.174\0,1\F,0  
,-1.154257,7.48701,6.256066\C,0,-2.444196,7.169269,6.325716\C,0,-2.893  
473,6.272045,7.294133\C,0,-3.289746,7.72075,5.395464\C,0,-1.947517,5.6  
96214,8.291173\C,0,-4.225567,5.962825,7.275051\F,0,-2.829366,8.558322,  
4.465211\C,0,-4.604365,7.396922,5.428857\C,0,-1.766835,4.331509,8.4390  
58\C,0,-1.180818,6.547177,9.080694\F,0,-4.723805,5.110645,8.185744\C,0  
,-5.107273,6.517959,6.349569\F,0,-5.470142,7.944752,4.539155\H,0,-2.40  
1281,3.656704,7.877806\C,0,-0.797973,3.794635,9.285827\C,0,-0.194529,6  
.062651,9.920306\H,0,-1.359815,7.61435,9.035135\F,0,-6.391539,6.183174  
,6.369128\C,0,0.051839,4.684555,9.985902\C,0,-0.679418,2.316712,9.3669  
25\C,0,0.529038,7.053615,10.755148\Au,0,1.615334,3.994045,11.1127\C,0,  
-0.571375,1.532706,8.233926\C,0,-0.747661,1.615489,10.559557\C,0,1.836  
008,7.429791,10.509467\C,0,-0.078645,7.698836,11.814205\Cl,0,3.260511,  
3.081604,12.52382\Cl,0,0.443065,4.678102,13.002542\P,0,2.994464,3.4949  
11,9.291313\F,0,-0.558617,2.102449,7.021497\C,0,-0.444371,0.164349,8.2

74475\F,0,-0.966629,2.257059,11.712593\C,0,-0.629347,0.226436,10.6335\  
F,0,2.472983,6.895353,9.43419\C,0,2.536792,8.319711,11.279906\F,0,-1.3  
37059,7.417618,12.111408\C,0,0.600126,8.610669,12.601341\C,0,2.288103,  
3.461068,7.616143\C,0,3.744577,1.863839,9.548205\C,0,4.368786,4.671164  
,9.197572\F,0,-0.283371,-0.549047,7.150301\C,0,-0.459539,-0.489395,9.4  
83804\F,0,-0.676029,-0.400525,11.812058\F,0,3.813807,8.611887,10.99439  
\C,0,1.914796,8.915019,12.336577\F,0,-0.040857,9.231544,13.605776\C,0,  
1.581765,4.543336,7.117624\C,0,2.588604,2.399495,6.776531\C,0,2.962443  
,0.822962,10.003791\C,0,5.058256,1.645924,9.297753\C,0,5.151002,4.9377  
74,10.31626\C,0,4.693041,5.329777,8.014482\F,0,-0.325143,-1.824883,9.5  
41288\F,0,2.558406,9.789112,13.105587\H,0,1.339665,5.372507,7.770947\C  
,0,1.181891,4.574989,5.796188\C,0,2.174417,2.433582,5.45271\H,0,3.1409  
84,1.547924,7.154118\C,0,3.519912,-0.399308,10.22085\H,0,1.906356,0.97  
8424,10.186979\C,0,5.604357,0.385915,9.512426\H,0,5.682237,2.452452,8.  
933046\H,0,4.911926,4.463718,11.260109\C,0,6.217889,5.791171,10.242317  
\C,0,5.728672,6.209957,7.959621\H,0,4.108508,5.139254,7.12287\H,0,0.63  
5316,5.425951,5.408821\C,0,1.490647,3.501242,4.968502\H,0,2.4011,1.600  
394,4.799148\H,0,2.90582,-1.213018,10.586272\C,0,4.835547,-0.603831,9.  
984709\H,0,6.650148,0.204036,9.297515\H,0,6.842899,5.952842,11.111745\  
C,0,6.49363,6.437611,9.075924\H,0,5.950183,6.728326,7.034855\H,0,1.181  
705,3.51719,3.930674\H,0,5.270361,-1.576412,10.179585\H,0,7.319936,7.1  
36154,9.029411\F,0,3.813807,-3.562113,10.99439\C,0,2.536793,-3.854289,  
11.279906\C,0,1.836009,-4.744208,10.509467\C,0,1.914797,-3.258981,12.3  
36577\C,0,0.529039,-5.120385,10.755148\F,0,2.472984,-5.278647,9.43419\  
F,0,2.558407,-2.384887,13.105587\C,0,0.600127,-3.56333,12.601341\C,0,-  
0.078645,-4.475163,11.814205\C,0,-0.194529,-6.111349,9.920306\F,0,-0.0  
40856,-2.942456,13.605776\F,0,-1.337058,-4.756382,12.111408\C,0,-1.180  
817,-5.626823,9.080694\C,0,0.05184,-7.489445,9.985902\H,0,-1.359815,-4  
.55965,9.035135\C,0,-1.947516,-6.477786,8.291173\Au,0,1.615335,-8.1799  
55,11.1127\C,0,-0.797973,-8.379365,9.285827\C,0,-1.766835,-7.842491,8.  
439058\C,0,-2.893472,-5.901955,7.294133\Cl,0,3.260511,-9.092396,12.523  
82\Cl,0,0.443065,-7.495897,13.002542\P,0,2.994464,-8.679089,9.291313\C  
,0,-0.679417,-9.857288,9.366925\H,0,-2.40128,-8.517296,7.877806\C,0,-2  
.444196,-5.004731,6.325716\C,0,-4.225566,-6.211175,7.275051\C,0,2.2881  
03,-8.712932,7.616143\C,0,3.744577,-10.310161,9.548205\C,0,4.368787,-7  
.502836,9.197572\C,0,-0.571374,-10.641294,8.233926\C,0,-0.747661,-10.5  
58511,10.559557\F,0,-1.154257,-4.68699,6.256066\C,0,-3.289745,-4.45324  
9,5.395464\F,0,-4.723805,-7.063355,8.185744\C,0,-5.107272,-5.656041,6.  
349569\C,0,1.581766,-7.630663,7.117624\C,0,2.588605,-9.774505,6.776531  
\C,0,2.962444,-11.351038,10.003791\C,0,5.058257,-10.528075,9.297753\C,  
0,5.151003,-7.236226,10.31626\C,0,4.693041,-6.844223,8.014482\F,0,-0.5  
58617,-10.07155,7.021497\C,0,-0.44437,-12.009651,8.274475\F,0,-0.96662  
8,-9.916941,11.712593\C,0,-0.629346,-11.947564,10.6335\F,0,-2.829366,-  
3.615678,4.465211\C,0,-4.604365,-4.777078,5.428857\F,0,-6.391538,-5.99  
0826,6.369128\H,0,1.339666,-6.801493,7.770947\C,0,1.181891,-7.599011,5.  
.796188\C,0,2.174418,-9.740417,5.45271\H,0,3.140984,-10.626076,7.15411  
8\H,0,1.906357,-11.195576,10.186979\C,0,3.519913,-12.573308,10.22085\C  
,0,5.604358,-11.788084,9.512426\H,0,5.682238,-9.721548,8.933046\H,0,4.  
911926,-7.710282,11.260109\C,0,6.21789,-6.382829,10.242317\C,0,5.72867  
3,-5.964043,7.959621\H,0,4.108508,-7.034746,7.12287\F,0,-0.28337,-12.7  
23047,7.150301\C,0,-0.459539,-12.663395,9.483804\F,0,-0.676029,-12.574  
525,11.812058\F,0,-5.470141,-4.229248,4.539155\H,0,0.635317,-6.748048,  
5.408821\C,0,1.490647,-8.672757,4.968502\H,0,2.4011,-10.573606,4.79914

8\H,0,2.90582,-13.387018,10.586272\C,0,4.835547,-12.777831,9.984709\H,  
0,6.650149,-11.969964,9.297515\H,0,6.842899,-6.221158,11.111745\C,0,6.  
493631,-5.736389,9.075924\H,0,5.950184,-5.445674,7.034855\F,0,-0.32514  
2,-13.998883,9.541288\H,0,1.181706,-8.65681,3.930674\H,0,5.270362,-13.  
750412,10.179585\H,0,7.319937,-5.037846,9.029411\\Version=ES64L-G09Rev  
E.01\HF=-4505.5965422\RMSD=5.817e-09\Dipole=3.1288582,-1.1087782,-7.43  
81686\Quadrupole=117.3884043,104.8133562,-222.2017604,-16.6431567,29.2  
879277,10.1048648\PG=C01 [X(C84H34Au2Cl4F30P2)]\@

1\1\GINC-COMPUTE021\SP\RB3LYP\Gen\C84H34Au2Cl4F30P2\CRAT\18-Sep-2020\0  
\#p b3lyp/gen pseudo=read counterpoise=2 empiricaldispersion=gd3bj no  
symm gfprint\CrystalExplorer Job symop = -x, -y, -z, r = 11.126\0,1\  
F,0,-1.154257,7.48701,6.256066\C,0,-2.444196,7.169269,6.325716\C,0,-2.  
893473,6.272045,7.294133\C,0,-3.289746,7.72075,5.395464\C,0,-1.947517,  
5.696214,8.291173\C,0,-4.225567,5.962825,7.275051\F,0,-2.829366,8.5583  
22,4.465211\C,0,-4.604365,7.396922,5.428857\C,0,-1.766835,4.331509,8.4  
39058\C,0,-1.180818,6.547177,9.080694\F,0,-4.723805,5.110645,8.185744\  
C,0,-5.107273,6.517959,6.349569\F,0,-5.470142,7.944752,4.539155\H,0,-2  
.401281,3.656704,7.877806\C,0,-0.797973,3.794635,9.285827\C,0,-0.19452  
9,6.062651,9.920306\H,0,-1.359815,7.61435,9.035135\F,0,-6.391539,6.183  
174,6.369128\C,0,0.051839,4.684555,9.985902\C,0,-0.679418,2.316712,9.3  
66925\C,0,0.529038,7.053615,10.755148\Au,0,1.615334,3.994045,11.1127\C  
,0,-0.571375,1.532706,8.233926\C,0,-0.747661,1.615489,10.559557\C,0,1.  
836008,7.429791,10.509467\C,0,-0.078645,7.698836,11.814205\Cl,0,3.2605  
11,3.081604,12.52382\Cl,0,0.443065,4.678102,13.002542\P,0,2.994464,3.4  
94911,9.291313\F,0,-0.558617,2.102449,7.021497\C,0,-0.444371,0.164349,  
8.274475\F,0,-0.966629,2.257059,11.712593\C,0,-0.629347,0.226436,10.63  
35\F,0,2.472983,6.895353,9.43419\C,0,2.536792,8.319711,11.279906\F,0,-  
1.337059,7.417618,12.111408\C,0,0.600126,8.610669,12.601341\C,0,2.2881  
03,3.461068,7.616143\C,0,3.744577,1.863839,9.548205\C,0,4.368786,4.671  
164,9.197572\F,0,-0.283371,-0.549047,7.150301\C,0,-0.459539,-0.489395,  
9.483804\F,0,-0.676029,-0.400525,11.812058\F,0,3.813807,8.611887,10.99  
439\C,0,1.914796,8.915019,12.336577\F,0,-0.040857,9.231544,13.605776\C  
,0,1.581765,4.543336,7.117624\C,0,2.588604,2.399495,6.776531\C,0,2.962  
443,0.822962,10.003791\C,0,5.058256,1.645924,9.297753\C,0,5.151002,4.9  
37774,10.31626\C,0,4.693041,5.329777,8.014482\F,0,-0.325143,-1.824883,  
9.541288\F,0,2.558406,9.789112,13.105587\H,0,1.339665,5.372507,7.77094  
7\C,0,1.181891,4.574989,5.796188\C,0,2.174417,2.433582,5.45271\H,0,3.1  
40984,1.547924,7.154118\C,0,3.519912,-0.399308,10.22085\H,0,1.906356,0  
.978424,10.186979\C,0,5.604357,0.385915,9.512426\H,0,5.682237,2.452452  
,8.933046\H,0,4.911926,4.463718,11.260109\C,0,6.217889,5.791171,10.242  
317\C,0,5.728672,6.209957,7.959621\H,0,4.108508,5.139254,7.12287\H,0,0  
.635316,5.425951,5.408821\C,0,1.490647,3.501242,4.968502\H,0,2.4011,1.  
600394,4.799148\H,0,2.90582,-1.213018,10.586272\C,0,4.835547,-0.603831  
,9.984709\H,0,6.650148,0.204036,9.297515\H,0,6.842899,5.952842,11.1117  
45\C,0,6.49363,6.437611,9.075924\H,0,5.950183,6.728326,7.034855\H,0,1.  
181705,3.51719,3.930674\H,0,5.270361,-1.576412,10.179585\H,0,7.319936,  
7.136154,9.029411\Au,0,9.00432,8.179954,12.739925\Cl,0,7.359144,9.0923  
95,11.328804\Cl,0,10.176589,7.495896,10.850082\P,0,7.62519,8.679088,14  
.561312\C,0,10.567816,7.489444,13.866724\C,0,6.875078,10.31016,14.3044  
19\C,0,6.250867,7.502835,14.655053\C,0,8.331551,8.712931,16.236483\C,0  
,10.814183,6.111347,13.932319\C,0,11.417627,8.379363,14.566798\C,0,5.5  
61398,10.528074,14.554872\C,0,7.657211,11.351036,13.848835\C,0,5.46865



2,7.236225,13.536365\C,0,5.926613,6.844222,15.838142\C,0,9.037889,7.63  
0662,16.735003\C,0,8.03105,9.774504,17.076094\C,0,10.090616,5.120384,1  
3.097476\C,0,11.800472,5.626822,14.771931\C,0,12.38649,7.84249,15.4135  
67\C,0,11.299071,9.857287,14.485699\C,0,5.015297,11.788083,14.340198\H  
,0,4.937417,9.721547,14.919579\C,0,7.099742,12.573306,13.631775\H,0,8.  
713298,11.195575,13.665647\H,0,5.707728,7.71028,12.592517\C,0,4.401765  
,6.382827,13.610307\C,0,4.890982,5.964042,15.893003\H,0,6.511147,7.034  
745,16.729753\H,0,9.279989,6.801491,16.081678\C,0,9.437763,7.59901,18.  
056438\C,0,8.445237,9.740417,18.399914\H,0,7.47867,10.626075,16.698507  
\C,0,8.783646,4.744207,13.343159\C,0,10.698298,4.475162,12.03842\H,0,1  
1.979469,4.559649,14.817489\C,0,12.567171,6.477785,15.561453\H,0,13.02  
0935,8.517295,15.974818\C,0,11.191029,10.641293,15.618699\C,0,11.36731  
5,10.558509,13.293067\H,0,3.969506,11.969963,14.55511\C,0,5.784107,12.  
777829,13.867915\H,0,7.713834,13.387016,13.266353\H,0,3.776755,6.22115  
7,12.74088\C,0,4.126024,5.736388,14.776701\H,0,4.66947,5.445673,16.817  
77\H,0,9.984338,6.748047,18.443804\C,0,9.129006,8.672757,18.884123\H,0  
,8.218554,10.573605,19.053476\F,0,8.146671,5.278646,14.418435\C,0,8.08  
2862,3.854288,12.57272\C,0,10.019527,3.563329,11.251284\F,0,11.956713,  
4.756381,11.741217\C,0,13.513127,5.901954,16.558493\F,0,11.178271,10.0  
71549,16.831127\C,0,11.064025,12.00965,15.57815\F,0,11.586283,9.91694,  
12.140032\C,0,11.249001,11.947563,13.219125\H,0,5.349293,13.75041,13.6  
7304\H,0,3.299718,5.037844,14.823214\H,0,9.437949,8.656809,19.921951\F  
,0,6.805847,3.562112,12.858234\C,0,8.704858,3.258979,11.516047\F,0,10.  
660511,2.942455,10.246849\C,0,13.063849,5.00473,17.526909\C,0,14.84522  
1,6.211174,16.577574\F,0,10.903025,12.723046,16.702324\C,0,11.079194,1  
2.663394,14.368821\F,0,11.295683,12.574524,12.040566\F,0,8.061248,2.38  
4886,10.747039\F,0,11.773911,4.686989,17.59656\C,0,13.9094,4.453248,18  
.457161\F,0,15.34346,7.063354,15.666881\C,0,15.726927,5.656039,17.5030  
56\F,0,10.944797,13.998881,14.311337\F,0,13.44902,3.615677,19.387413\C  
,0,15.224019,4.777077,18.423767\F,0,17.011192,5.990824,17.483498\F,0,1  
6.089796,4.229247,19.313471\\Version=ES64L-G09RevE.01\HF=-4505.5965208  
\RMSD=5.816e-09\Dipole=-0.0000067,-0.0000014,0.0000016\Quadrupole=-40.  
417874,12.843991,27.573883,-7.7281663,35.0801337,35.1197634\PG=C01 [X(  
C84H34Au2Cl4F30P2)]\@

1\1\GINC-COMPUTE008\SP\RB3LYP\Gen\C43H18Au1Cl5F15P1\CRAT\18-Sep-2020\0  
\#p b3lyp/gen pseudo=read counterpoise=2 empiricaldispersion=gd3bj no  
symm gfprint\CrystalExplorer Job symop = -, r = 6.75282\0,1\F,0,-1.1  
54257,7.48701,6.256066\C,0,-2.444196,7.169269,6.325716\C,0,-2.893473,6  
.272045,7.294133\C,0,-3.289746,7.72075,5.395464\C,0,-1.947517,5.696214  
,8.291173\C,0,-4.225567,5.962825,7.275051\F,0,-2.829366,8.558322,4.465  
211\C,0,-4.604365,7.396922,5.428857\C,0,-1.766835,4.331509,8.439058\C,  
0,-1.180818,6.547177,9.080694\F,0,-4.723805,5.110645,8.185744\C,0,-5.1  
07273,6.517959,6.349569\F,0,-5.470142,7.944752,4.539155\H,0,-2.401281,  
3.656704,7.877806\C,0,-0.797973,3.794635,9.285827\C,0,-0.194529,6.0626  
51,9.920306\H,0,-1.359815,7.61435,9.035135\F,0,-6.391539,6.183174,6.36  
9128\C,0,0.051839,4.684555,9.985902\C,0,-0.679418,2.316712,9.366925\C,  
0,0.529038,7.053615,10.755148\Au,0,1.615334,3.994045,11.1127\C,0,-0.57  
1375,1.532706,8.233926\C,0,-0.747661,1.615489,10.559557\C,0,1.836008,7  
.429791,10.509467\C,0,-0.078645,7.698836,11.814205\Cl,0,3.260511,3.081  
604,12.52382\Cl,0,0.443065,4.678102,13.002542\P,0,2.994464,3.494911,9.  
291313\F,0,-0.558617,2.102449,7.021497\C,0,-0.444371,0.164349,8.274475  
\F,0,-0.966629,2.257059,11.712593\C,0,-0.629347,0.226436,10.6335\F,0,2

.472983,6.895353,9.43419\C,0,2.536792,8.319711,11.279906\F,0,-1.337059  
,7.417618,12.111408\C,0,0.600126,8.610669,12.601341\C,0,2.288103,3.461  
068,7.616143\C,0,3.744577,1.863839,9.548205\C,0,4.368786,4.671164,9.19  
7572\F,0,-0.283371,-0.549047,7.150301\C,0,-0.459539,-0.489395,9.483804  
\F,0,-0.676029,-0.400525,11.812058\F,0,3.813807,8.611887,10.99439\C,0,  
1.914796,8.915019,12.336577\F,0,-0.040857,9.231544,13.605776\C,0,1.581  
765,4.543336,7.117624\C,0,2.588604,2.399495,6.776531\C,0,2.962443,0.82  
2962,10.003791\C,0,5.058256,1.645924,9.297753\C,0,5.151002,4.937774,10  
.31626\C,0,4.693041,5.329777,8.014482\F,0,-0.325143,-1.824883,9.541288  
\F,0,2.558406,9.789112,13.105587\H,0,1.339665,5.372507,7.770947\C,0,1.  
181891,4.574989,5.796188\C,0,2.174417,2.433582,5.45271\H,0,3.140984,1.  
547924,7.154118\C,0,3.519912,-0.399308,10.22085\H,0,1.906356,0.978424,  
10.186979\C,0,5.604357,0.385915,9.512426\H,0,5.682237,2.452452,8.93304  
6\H,0,4.911926,4.463718,11.260109\C,0,6.217889,5.791171,10.242317\C,0,  
5.728672,6.209957,7.959621\H,0,4.108508,5.139254,7.12287\H,0,0.635316,  
5.425951,5.408821\C,0,1.490647,3.501242,4.968502\H,0,2.4011,1.600394,4  
.799148\H,0,2.90582,-1.213018,10.586272\C,0,4.835547,-0.603831,9.98470  
9\H,0,6.650148,0.204036,9.297515\H,0,6.842899,5.952842,11.111745\C,0,6  
.49363,6.437611,9.075924\H,0,5.950183,6.728326,7.034855\H,0,1.181705,3  
.51719,3.930674\H,0,5.270361,-1.576412,10.179585\H,0,7.319936,7.136154  
,9.029411\Cl,0,1.246728,0.375811,14.348309\C,0,1.087195,1.94297,15.067  
702\H,0,1.2052,2.69021,14.292732\Cl,0,-0.493401,2.134223,15.782804\Cl,  
0,2.325448,2.193511,16.269875\\Version=ES64L-G09RevE.01\HF=-1419.27489  
18\RMSD=2.681e-09\Dipole=1.7631011,-0.0176582,-4.7001671\Quadrupole=78  
.8516936,62.7420499,-141.5937435,11.7180795,17.18326,-28.5632486\PG=CO  
1 [X(C43H18Au1Cl5F15P1)]\@\@

1\1\GINC-COMPUTE040\SP\RB3LYP\Gen\C43H18Au1Cl5F15P1\CRAT\18-Sep-2020\0  
\#p b3lyp/gen pseudo=read counterpoise=2 empiricaldispersion=gd3bj no  
symm gfprint\CrystalExplorer Job symop = -, r = 10.8271\0,1\F,0,-1.1  
54257,7.48701,6.256066\C,0,-2.444196,7.169269,6.325716\C,0,-2.893473,6  
.272045,7.294133\C,0,-3.289746,7.72075,5.395464\C,0,-1.947517,5.696214  
,8.291173\C,0,-4.225567,5.962825,7.275051\F,0,-2.829366,8.558322,4.465  
211\C,0,-4.604365,7.396922,5.428857\C,0,-1.766835,4.331509,8.439058\C,  
0,-1.180818,6.547177,9.080694\F,0,-4.723805,5.110645,8.185744\C,0,-5.1  
07273,6.517959,6.349569\F,0,-5.470142,7.944752,4.539155\H,0,-2.401281,  
3.656704,7.877806\C,0,-0.797973,3.794635,9.285827\C,0,-0.194529,6.0626  
51,9.920306\H,0,-1.359815,7.61435,9.035135\F,0,-6.391539,6.183174,6.36  
9128\C,0,0.051839,4.684555,9.985902\C,0,-0.679418,2.316712,9.366925\C,  
0,0.529038,7.053615,10.755148\Au,0,1.615334,3.994045,11.1127\C,0,-0.57  
1375,1.532706,8.233926\C,0,-0.747661,1.615489,10.559557\C,0,1.836008,7  
.429791,10.509467\C,0,-0.078645,7.698836,11.814205\Cl,0,3.260511,3.081  
604,12.52382\Cl,0,0.443065,4.678102,13.002542\P,0,2.994464,3.494911,9.  
291313\F,0,-0.558617,2.102449,7.021497\C,0,-0.444371,0.164349,8.274475  
\F,0,-0.966629,2.257059,11.712593\C,0,-0.629347,0.226436,10.6335\F,0,2  
.472983,6.895353,9.43419\C,0,2.536792,8.319711,11.279906\F,0,-1.337059  
,7.417618,12.111408\C,0,0.600126,8.610669,12.601341\C,0,2.288103,3.461  
068,7.616143\C,0,3.744577,1.863839,9.548205\C,0,4.368786,4.671164,9.19  
7572\F,0,-0.283371,-0.549047,7.150301\C,0,-0.459539,-0.489395,9.483804  
\F,0,-0.676029,-0.400525,11.812058\F,0,3.813807,8.611887,10.99439\C,0,  
1.914796,8.915019,12.336577\F,0,-0.040857,9.231544,13.605776\C,0,1.581  
765,4.543336,7.117624\C,0,2.588604,2.399495,6.776531\C,0,2.962443,0.82  
2962,10.003791\C,0,5.058256,1.645924,9.297753\C,0,5.151002,4.937774,10

.31626\C,0,4.693041,5.329777,8.014482\F,0,-0.325143,-1.824883,9.541288  
\F,0,2.558406,9.789112,13.105587\H,0,1.339665,5.372507,7.770947\C,0,1.  
181891,4.574989,5.796188\C,0,2.174417,2.433582,5.45271\H,0,3.140984,1.  
547924,7.154118\C,0,3.519912,-0.399308,10.22085\H,0,1.906356,0.978424,  
10.186979\C,0,5.604357,0.385915,9.512426\H,0,5.682237,2.452452,8.93304  
6\H,0,4.911926,4.463718,11.260109\C,0,6.217889,5.791171,10.242317\C,0,  
5.728672,6.209957,7.959621\H,0,4.108508,5.139254,7.12287\H,0,0.635316,  
5.425951,5.408821\C,0,1.490647,3.501242,4.968502\H,0,2.4011,1.600394,4  
.799148\H,0,2.90582,-1.213018,10.586272\C,0,4.835547,-0.603831,9.98470  
9\H,0,6.650148,0.204036,9.297515\H,0,6.842899,5.952842,11.111745\C,0,6  
.49363,6.437611,9.075924\H,0,5.950183,6.728326,7.034855\H,0,1.181705,3  
.51719,3.930674\H,0,5.270361,-1.576412,10.179585\H,0,7.319936,7.136154  
,9.029411\Cl,0,8.294206,9.980488,7.582749\C,0,9.53246,10.231029,8.7849  
22\H,0,9.414454,9.483788,9.559894\Cl,0,9.372926,11.798187,9.504317\Cl,  
0,11.113055,10.039775,8.069819\\Version=ES64L-G09RevE.01\HF=-1419.2748  
94\RMSD=2.681e-09\Dipole=1.5514812,-0.8414714,-3.5078594\Quadrupole=63  
.4624292,34.6914415,-98.1538708,3.772387,20.6996821,-37.1293352\PG=C01  
[X(C43H18Au1Cl5F15P1)]\@

1\1\GINC-COMPUTE008\SP\RB3LYP\Gen\C43H18Au1Cl5F15P1\CRAT\18-Sep-2020\0  
\#p b3lyp/gen pseudo=read counterpoise=2 empiricaldispersion=gd3bj no  
symm gfprint\CystalExplorer Job symop = -, r = 11.0881\0,1\F,0,-1.1  
54257,7.48701,6.256066\C,0,-2.444196,7.169269,6.325716\C,0,-2.893473,6  
.272045,7.294133\C,0,-3.289746,7.72075,5.395464\C,0,-1.947517,5.696214  
,8.291173\C,0,-4.225567,5.962825,7.275051\F,0,-2.829366,8.558322,4.465  
211\C,0,-4.604365,7.396922,5.428857\C,0,-1.766835,4.331509,8.439058\C,  
0,-1.180818,6.547177,9.080694\F,0,-4.723805,5.110645,8.185744\C,0,-5.1  
07273,6.517959,6.349569\F,0,-5.470142,7.944752,4.539155\H,0,-2.401281,  
3.656704,7.877806\C,0,-0.797973,3.794635,9.285827\C,0,-0.194529,6.0626  
51,9.920306\H,0,-1.359815,7.61435,9.035135\F,0,-6.391539,6.183174,6.36  
9128\C,0,0.051839,4.684555,9.985902\C,0,-0.679418,2.316712,9.366925\C,  
0,0.529038,7.053615,10.755148\Au,0,1.615334,3.994045,11.1127\C,0,-0.57  
1375,1.532706,8.233926\C,0,-0.747661,1.615489,10.559557\C,0,1.836008,7  
.429791,10.509467\C,0,-0.078645,7.698836,11.814205\Cl,0,3.260511,3.081  
604,12.52382\Cl,0,0.443065,4.678102,13.002542\P,0,2.994464,3.494911,9.  
291313\F,0,-0.558617,2.102449,7.021497\C,0,-0.444371,0.164349,8.274475  
\F,0,-0.966629,2.257059,11.712593\C,0,-0.629347,0.226436,10.6335\F,0,2  
.472983,6.895353,9.43419\C,0,2.536792,8.319711,11.279906\F,0,-1.337059  
,7.417618,12.111408\C,0,0.600126,8.610669,12.601341\C,0,2.288103,3.461  
068,7.616143\C,0,3.744577,1.863839,9.548205\C,0,4.368786,4.671164,9.19  
7572\F,0,-0.283371,-0.549047,7.150301\C,0,-0.459539,-0.489395,9.483804  
\F,0,-0.676029,-0.400525,11.812058\F,0,3.813807,8.611887,10.99439\C,0,  
1.914796,8.915019,12.336577\F,0,-0.040857,9.231544,13.605776\C,0,1.581  
765,4.543336,7.117624\C,0,2.588604,2.399495,6.776531\C,0,2.962443,0.82  
2962,10.003791\C,0,5.058256,1.645924,9.297753\C,0,5.151002,4.937774,10  
.31626\C,0,4.693041,5.329777,8.014482\F,0,-0.325143,-1.824883,9.541288  
\F,0,2.558406,9.789112,13.105587\H,0,1.339665,5.372507,7.770947\C,0,1.  
181891,4.574989,5.796188\C,0,2.174417,2.433582,5.45271\H,0,3.140984,1.  
547924,7.154118\C,0,3.519912,-0.399308,10.22085\H,0,1.906356,0.978424,  
10.186979\C,0,5.604357,0.385915,9.512426\H,0,5.682237,2.452452,8.93304  
6\H,0,4.911926,4.463718,11.260109\C,0,6.217889,5.791171,10.242317\C,0,  
5.728672,6.209957,7.959621\H,0,4.108508,5.139254,7.12287\H,0,0.635316,  
5.425951,5.408821\C,0,1.490647,3.501242,4.968502\H,0,2.4011,1.600394,4

.799148\H,0,2.90582,-1.213018,10.586272\C,0,4.835547,-0.603831,9.98470  
9\H,0,6.650148,0.204036,9.297515\H,0,6.842899,5.952842,11.111745\C,0,6  
.49363,6.437611,9.075924\H,0,5.950183,6.728326,7.034855\H,0,1.181705,3  
.51719,3.930674\H,0,5.270361,-1.576412,10.179585\H,0,7.319936,7.136154  
,9.029411\Cl,0,1.246728,12.54981,14.348309\C,0,1.087194,14.116969,15.0  
67702\Cl,0,-0.493401,14.308223,15.782804\Cl,0,2.325448,14.36751,16.269  
875\H,0,1.2052,14.864209,14.292732\\Version=ES64L-G09RevE.01\HF=-1419.  
274894\RMSD=2.681e-09\Dipole=1.6922436,-0.2991555,-4.2287381\Quadrupol  
e=67.6116736,61.6590509,-129.2707244,12.3317905,16.4422799,-42.1132053  
\PG=C01 [X(C43H18Au1Cl5F15P1)]\@
